# Supplementary material for: Comprehensive profiling of serum glycosphingolipids to discover the diagnostic biomarkers of lung cancer and uncover the variation of glycosphingolipid networks in different lung cancer subtypes
Source: Royal Society of Chemistry journal article supplement (doi:10.1039/d4ay01685h), 2024-01-01
Supplement: d4ay01685h1.xlsx [file d4ay01685h1.xlsx]

## Sheet: GM1
Name		dbs	C	H	N	O	mass(form[+H] name[+H])
31	:	0	68	123	3	31	1478.82
32	:	0	69	125	3	31	1492.84
33	:	0	70	127	3	31	1506.85
34	:	0	71	129	3	31	1520.87
35	:	0	72	131	3	31	1534.88
36	:	0	73	133	3	31	1548.9
37	:	0	74	135	3	31	1562.92
38	:	0	75	137	3	31	1576.93
39	:	0	76	139	3	31	1590.95
40	:	0	77	141	3	31	1604.96
41	:	0	78	143	3	31	1618.98
42	:	0	79	145	3	31	1632.99
43	:	0	80	147	3	31	1647.01
44	:	0	81	149	3	31	1661.03
45	:	0	82	151	3	31	1675.04
46	:	0	83	153	3	31	1689.06
47	:	0	84	155	3	31	1703.07
48	:	0	85	157	3	31	1717.09
49	:	0	86	159	3	31	1731.1
50	:	0	87	161	3	31	1745.12
30	:	1	67	119	3	31	1462.79
31	:	1	68	121	3	31	1476.81
32	:	1	69	123	3	31	1490.82
33	:	1	70	125	3	31	1504.84
34	:	1	71	127	3	31	1518.85
35	:	1	72	129	3	31	1532.87
36	:	1	73	131	3	31	1546.88
37	:	1	74	133	3	31	1560.9
38	:	1	75	135	3	31	1574.92
39	:	1	76	137	3	31	1588.93
40	:	1	77	139	3	31	1602.95
41	:	1	78	141	3	31	1616.96
42	:	1	79	143	3	31	1630.98
43	:	1	80	145	3	31	1644.99
44	:	1	81	147	3	31	1659.01
45	:	1	82	149	3	31	1673.03
46	:	1	83	151	3	31	1687.04
47	:	1	84	153	3	31	1701.06
48	:	1	85	155	3	31	1715.07
49	:	1	86	157	3	31	1729.09
50	:	1	87	159	3	31	1743.1
30	:	2	67	117	3	31	1460.77
31	:	2	68	119	3	31	1474.79
32	:	2	69	121	3	31	1488.81
33	:	2	70	123	3	31	1502.82
34	:	2	71	125	3	31	1516.84
35	:	2	72	127	3	31	1530.85
36	:	2	73	129	3	31	1544.87
37	:	2	74	131	3	31	1558.88
38	:	2	75	133	3	31	1572.9
39	:	2	76	135	3	31	1586.92
40	:	2	77	137	3	31	1600.93
41	:	2	78	139	3	31	1614.95
42	:	2	79	141	3	31	1628.96
43	:	2	80	143	3	31	1642.98
44	:	2	81	145	3	31	1656.99
45	:	2	82	147	3	31	1671.01
46	:	2	83	149	3	31	1685.03
47	:	2	84	151	3	31	1699.04
48	:	2	85	153	3	31	1713.06
49	:	2	86	155	3	31	1727.07
50	:	2	87	157	3	31	1741.09
30	:	3	67	115	3	31	1458.76
31	:	3	68	117	3	31	1472.78
32	:	3	69	119	3	31	1486.79
33	:	3	70	121	3	31	1500.81
34	:	3	71	123	3	31	1514.82
35	:	3	72	125	3	31	1528.84
36	:	3	73	127	3	31	1542.85
37	:	3	74	129	3	31	1556.87
38	:	3	75	131	3	31	1570.88
39	:	3	76	133	3	31	1584.9
40	:	3	77	135	3	31	1598.92
41	:	3	78	137	3	31	1612.93
42	:	3	79	139	3	31	1626.95
43	:	3	80	141	3	31	1640.96
44	:	3	81	143	3	31	1654.98
45	:	3	82	145	3	31	1668.99
46	:	3	83	147	3	31	1683.01
47	:	3	84	149	3	31	1697.03
48	:	3	85	151	3	31	1711.04
49	:	3	86	153	3	31	1725.06
50	:	3	87	155	3	31	1739.07
30	:	4	67	113	3	31	1456.74
31	:	4	68	115	3	31	1470.76
32	:	4	69	117	3	31	1484.78
33	:	4	70	119	3	31	1498.79
34	:	4	71	121	3	31	1512.81
35	:	4	72	123	3	31	1526.82
36	:	4	73	125	3	31	1540.84
37	:	4	74	127	3	31	1554.85
38	:	4	75	129	3	31	1568.87
39	:	4	76	131	3	31	1582.88
40	:	4	77	133	3	31	1596.9
41	:	4	78	135	3	31	1610.92
42	:	4	79	137	3	31	1624.93
43	:	4	80	139	3	31	1638.95
44	:	4	81	141	3	31	1652.96
45	:	4	82	143	3	31	1666.98
46	:	4	83	145	3	31	1680.99
47	:	4	84	147	3	31	1695.01
48	:	4	85	149	3	31	1709.03
49	:	4	86	151	3	31	1723.04
50	:	4	87	153	3	31	1737.06
30	:	5	67	111	3	31	1454.73
31	:	5	68	113	3	31	1468.74
32	:	5	69	115	3	31	1482.76
33	:	5	70	117	3	31	1496.78
34	:	5	71	119	3	31	1510.79
35	:	5	72	121	3	31	1524.81
36	:	5	73	123	3	31	1538.82
37	:	5	74	125	3	31	1552.84
38	:	5	75	127	3	31	1566.85
39	:	5	76	129	3	31	1580.87
40	:	5	77	131	3	31	1594.88
41	:	5	78	133	3	31	1608.9
42	:	5	79	135	3	31	1622.92
43	:	5	80	137	3	31	1636.93
44	:	5	81	139	3	31	1650.95
45	:	5	82	141	3	31	1664.96
46	:	5	83	143	3	31	1678.98
47	:	5	84	145	3	31	1692.99
48	:	5	85	147	3	31	1707.01
49	:	5	86	149	3	31	1721.03
50	:	5	87	151	3	31	1735.04

## Sheet: GM2
Name		dbs	C	H	N	O	mass(form[+H] name[+H])
32	:	0	63	115	3	26	1330.78
33	:	0	64	117	3	26	1344.8
34	:	0	65	119	3	26	1358.82
35	:	0	66	121	3	26	1372.83
36	:	0	67	123	3	26	1386.85
37	:	0	68	125	3	26	1400.86
38	:	0	69	127	3	26	1414.88
39	:	0	70	129	3	26	1428.89
40	:	0	71	131	3	26	1442.91
41	:	0	72	133	3	26	1456.93
42	:	0	73	135	3	26	1470.94
43	:	0	74	137	3	26	1484.96
44	:	0	75	139	3	26	1498.97
45	:	0	76	141	3	26	1512.99
46	:	0	77	143	3	26	1527
47	:	0	78	145	3	26	1541.02
48	:	0	79	147	3	26	1555.04
49	:	0	80	149	3	26	1569.05
50	:	0	81	151	3	26	1583.07
32	:	1	63	113	3	26	1328.77
33	:	1	64	115	3	26	1342.78
34	:	1	65	117	3	26	1356.8
35	:	1	66	119	3	26	1370.82
36	:	1	67	121	3	26	1384.83
37	:	1	68	123	3	26	1398.85
38	:	1	69	125	3	26	1412.86
39	:	1	70	127	3	26	1426.88
40	:	1	71	129	3	26	1440.89
41	:	1	72	131	3	26	1454.91
42	:	1	73	133	3	26	1468.93
43	:	1	74	135	3	26	1482.94
44	:	1	75	137	3	26	1496.96
45	:	1	76	139	3	26	1510.97
46	:	1	77	141	3	26	1524.99
47	:	1	78	143	3	26	1539
48	:	1	79	145	3	26	1553.02
49	:	1	80	147	3	26	1567.04
50	:	1	81	149	3	26	1581.05
32	:	2	63	111	3	26	1326.75
33	:	2	64	113	3	26	1340.77
34	:	2	65	115	3	26	1354.78
35	:	2	66	117	3	26	1368.8
36	:	2	67	119	3	26	1382.82
37	:	2	68	121	3	26	1396.83
38	:	2	69	123	3	26	1410.85
39	:	2	70	125	3	26	1424.86
40	:	2	71	127	3	26	1438.88
41	:	2	72	129	3	26	1452.89
42	:	2	73	131	3	26	1466.91
43	:	2	74	133	3	26	1480.93
44	:	2	75	135	3	26	1494.94
45	:	2	76	137	3	26	1508.96
46	:	2	77	139	3	26	1522.97
47	:	2	78	141	3	26	1536.99
48	:	2	79	143	3	26	1551
49	:	2	80	145	3	26	1565.02
50	:	2	81	147	3	26	1579.04
32	:	3	63	109	3	26	1324.74
33	:	3	64	111	3	26	1338.75
34	:	3	65	113	3	26	1352.77
35	:	3	66	115	3	26	1366.78
36	:	3	67	117	3	26	1380.8
37	:	3	68	119	3	26	1394.82
38	:	3	69	121	3	26	1408.83
39	:	3	70	123	3	26	1422.85
40	:	3	71	125	3	26	1436.86
41	:	3	72	127	3	26	1450.88
42	:	3	73	129	3	26	1464.89
43	:	3	74	131	3	26	1478.91
44	:	3	75	133	3	26	1492.93
45	:	3	76	135	3	26	1506.94
46	:	3	77	137	3	26	1520.96
47	:	3	78	139	3	26	1534.97
48	:	3	79	141	3	26	1548.99
49	:	3	80	143	3	26	1563
50	:	3	81	145	3	26	1577.02
32	:	4	63	107	3	26	1322.72
33	:	4	64	109	3	26	1336.74
34	:	4	65	111	3	26	1350.75
35	:	4	66	113	3	26	1364.77
36	:	4	67	115	3	26	1378.78
37	:	4	68	117	3	26	1392.8
38	:	4	69	119	3	26	1406.82
39	:	4	70	121	3	26	1420.83
40	:	4	71	123	3	26	1434.85
41	:	4	72	125	3	26	1448.86
42	:	4	73	127	3	26	1462.88
43	:	4	74	129	3	26	1476.89
44	:	4	75	131	3	26	1490.91
45	:	4	76	133	3	26	1504.93
46	:	4	77	135	3	26	1518.94
47	:	4	78	137	3	26	1532.96
48	:	4	79	139	3	26	1546.97
49	:	4	80	141	3	26	1560.99
50	:	4	81	143	3	26	1575
32	:	5	63	105	3	26	1320.71
33	:	5	64	107	3	26	1334.72
34	:	5	65	109	3	26	1348.74
35	:	5	66	111	3	26	1362.75
36	:	5	67	113	3	26	1376.77
37	:	5	68	115	3	26	1390.78
38	:	5	69	117	3	26	1404.8
39	:	5	70	119	3	26	1418.82
40	:	5	71	121	3	26	1432.83
41	:	5	72	123	3	26	1446.85
42	:	5	73	125	3	26	1460.86
43	:	5	74	127	3	26	1474.88
44	:	5	75	129	3	26	1488.89
45	:	5	76	131	3	26	1502.91
46	:	5	77	133	3	26	1516.93
47	:	5	78	135	3	26	1530.94
48	:	5	79	137	3	26	1544.96
49	:	5	80	139	3	26	1558.97
50	:	5	81	141	3	26	1572.99

## Sheet: GM3
Name		dbs	C	H	N	O	mass(form[+H] name[+H])
30	:	0	53	98	2	21	1099.67
31	:	0	54	100	2	21	1113.69
32	:	0	55	102	2	21	1127.71
33	:	0	56	104	2	21	1141.72
34	:	0	57	106	2	21	1155.74
35	:	0	58	108	2	21	1169.75
36	:	0	59	110	2	21	1183.77
37	:	0	60	112	2	21	1197.78
38	:	0	61	114	2	21	1211.8
39	:	0	62	116	2	21	1225.81
40	:	0	63	118	2	21	1239.83
41	:	0	64	120	2	21	1253.85
42	:	0	65	122	2	21	1267.86
43	:	0	66	124	2	21	1281.88
44	:	0	67	126	2	21	1295.89
45	:	0	68	128	2	21	1309.91
46	:	0	69	130	2	21	1323.92
47	:	0	70	132	2	21	1337.94
48	:	0	71	134	2	21	1351.96
49	:	0	72	136	2	21	1365.97
50	:	0	73	138	2	21	1379.99
30	:	1	53	96	2	21	1097.66
31	:	1	54	98	2	21	1111.67
32	:	1	55	100	2	21	1125.69
33	:	1	56	102	2	21	1139.71
34	:	1	57	104	2	21	1153.72
35	:	1	58	106	2	21	1167.74
36	:	1	59	108	2	21	1181.75
37	:	1	60	110	2	21	1195.77
38	:	1	61	112	2	21	1209.78
39	:	1	62	114	2	21	1223.8
40	:	1	63	116	2	21	1237.82
41	:	1	64	118	2	21	1251.83
42	:	1	65	120	2	21	1265.85
43	:	1	66	122	2	21	1279.86
44	:	1	67	124	2	21	1293.88
45	:	1	68	126	2	21	1307.89
46	:	1	69	128	2	21	1321.91
47	:	1	70	130	2	21	1335.92
48	:	1	71	132	2	21	1349.94
49	:	1	72	134	2	21	1363.96
50	:	1	73	136	2	21	1377.97
30	:	2	53	94	2	21	1095.64
31	:	2	54	96	2	21	1109.66
32	:	2	55	98	2	21	1123.67
33	:	2	56	100	2	21	1137.69
34	:	2	57	102	2	21	1151.71
35	:	2	58	104	2	21	1165.72
36	:	2	59	106	2	21	1179.74
37	:	2	60	108	2	21	1193.75
38	:	2	61	110	2	21	1207.77
39	:	2	62	112	2	21	1221.78
40	:	2	63	114	2	21	1235.8
41	:	2	64	116	2	21	1249.82
42	:	2	65	118	2	21	1263.83
43	:	2	66	120	2	21	1277.85
44	:	2	67	122	2	21	1291.86
45	:	2	68	124	2	21	1305.88
46	:	2	69	126	2	21	1319.89
47	:	2	70	128	2	21	1333.91
48	:	2	71	130	2	21	1347.93
49	:	2	72	132	2	21	1361.94
50	:	2	73	134	2	21	1375.96
30	:	3	53	92	2	21	1093.63
31	:	3	54	94	2	21	1107.64
32	:	3	55	96	2	21	1121.66
33	:	3	56	98	2	21	1135.67
34	:	3	57	100	2	21	1149.69
35	:	3	58	102	2	21	1163.71
36	:	3	59	104	2	21	1177.72
37	:	3	60	106	2	21	1191.74
38	:	3	61	108	2	21	1205.75
39	:	3	62	110	2	21	1219.77
40	:	3	63	112	2	21	1233.78
41	:	3	64	114	2	21	1247.8
42	:	3	65	116	2	21	1261.82
43	:	3	66	118	2	21	1275.83
44	:	3	67	120	2	21	1289.85
45	:	3	68	122	2	21	1303.86
46	:	3	69	124	2	21	1317.88
47	:	3	70	126	2	21	1331.89
48	:	3	71	128	2	21	1345.91
49	:	3	72	130	2	21	1359.93
50	:	3	73	132	2	21	1373.94
30	:	4	53	90	2	21	1091.61
31	:	4	54	92	2	21	1105.63
32	:	4	55	94	2	21	1119.64
33	:	4	56	96	2	21	1133.66
34	:	4	57	98	2	21	1147.67
35	:	4	58	100	2	21	1161.69
36	:	4	59	102	2	21	1175.71
37	:	4	60	104	2	21	1189.72
38	:	4	61	106	2	21	1203.74
39	:	4	62	108	2	21	1217.75
40	:	4	63	110	2	21	1231.77
41	:	4	64	112	2	21	1245.78
42	:	4	65	114	2	21	1259.8
43	:	4	66	116	2	21	1273.82
44	:	4	67	118	2	21	1287.83
45	:	4	68	120	2	21	1301.85
46	:	4	69	122	2	21	1315.86
47	:	4	70	124	2	21	1329.88
48	:	4	71	126	2	21	1343.89
49	:	4	72	128	2	21	1357.91
50	:	4	73	130	2	21	1371.93
30	:	5	53	88	2	21	1089.6
31	:	5	54	90	2	21	1103.61
32	:	5	55	92	2	21	1117.63
33	:	5	56	94	2	21	1131.64
34	:	5	57	96	2	21	1145.66
35	:	5	58	98	2	21	1159.67
36	:	5	59	100	2	21	1173.69
37	:	5	60	102	2	21	1187.71
38	:	5	61	104	2	21	1201.72
39	:	5	62	106	2	21	1215.74
40	:	5	63	108	2	21	1229.75
41	:	5	64	110	2	21	1243.77
42	:	5	65	112	2	21	1257.78
43	:	5	66	114	2	21	1271.8
44	:	5	67	116	2	21	1285.82
45	:	5	68	118	2	21	1299.83
46	:	5	69	120	2	21	1313.85
47	:	5	70	122	2	21	1327.86
48	:	5	71	124	2	21	1341.88
49	:	5	72	126	2	21	1355.89
50	:	5	73	128	2	21	1369.91
30	:	6	53	86	2	21	1087.58
31	:	6	54	88	2	21	1101.6
32	:	6	55	90	2	21	1115.61
33	:	6	56	92	2	21	1129.63
34	:	6	57	94	2	21	1143.64
35	:	6	58	96	2	21	1157.66
36	:	6	59	98	2	21	1171.67
37	:	6	60	100	2	21	1185.69
38	:	6	61	102	2	21	1199.71
39	:	6	62	104	2	21	1213.72
40	:	6	63	106	2	21	1227.74
41	:	6	64	108	2	21	1241.75
42	:	6	65	110	2	21	1255.77
43	:	6	66	112	2	21	1269.78
44	:	6	67	114	2	21	1283.8
45	:	6	68	116	2	21	1297.82
46	:	6	69	118	2	21	1311.83
47	:	6	70	120	2	21	1325.85
48	:	6	71	122	2	21	1339.86
49	:	6	72	124	2	21	1353.88
50	:	6	73	126	2	21	1367.89

## Sheet: GM4
Name		dbs	C	H	N	O	mass(form[+H] name[+H])
32	:	0	49	92	2	16	965.652
33	:	0	50	94	2	16	979.668
34	:	0	51	96	2	16	993.684
35	:	0	52	98	2	16	1007.7
36	:	0	53	100	2	16	1021.71
37	:	0	54	102	2	16	1035.73
38	:	0	55	104	2	16	1049.75
39	:	0	56	106	2	16	1063.76
40	:	0	57	108	2	16	1077.78
41	:	0	58	110	2	16	1091.79
42	:	0	59	112	2	16	1105.81
43	:	0	60	114	2	16	1119.82
44	:	0	61	116	2	16	1133.84
45	:	0	62	118	2	16	1147.86
46	:	0	63	120	2	16	1161.87
47	:	0	64	122	2	16	1175.89
48	:	0	65	124	2	16	1189.9
49	:	0	66	126	2	16	1203.92
50	:	0	67	128	2	16	1217.93
32	:	1	49	90	2	16	963.637
33	:	1	50	92	2	16	977.652
34	:	1	51	94	2	16	991.668
35	:	1	52	96	2	16	1005.68
36	:	1	53	98	2	16	1019.7
37	:	1	54	100	2	16	1033.72
38	:	1	55	102	2	16	1047.73
39	:	1	56	104	2	16	1061.75
40	:	1	57	106	2	16	1075.76
41	:	1	58	108	2	16	1089.78
42	:	1	59	110	2	16	1103.79
43	:	1	60	112	2	16	1117.81
44	:	1	61	114	2	16	1131.82
45	:	1	62	116	2	16	1145.84
46	:	1	63	118	2	16	1159.86
47	:	1	64	120	2	16	1173.87
48	:	1	65	122	2	16	1187.89
49	:	1	66	124	2	16	1201.9
50	:	1	67	126	2	16	1215.92
32	:	2	49	88	2	16	961.621
33	:	2	50	90	2	16	975.637
34	:	2	51	92	2	16	989.652
35	:	2	52	94	2	16	1003.67
36	:	2	53	96	2	16	1017.68
37	:	2	54	98	2	16	1031.7
38	:	2	55	100	2	16	1045.72
39	:	2	56	102	2	16	1059.73
40	:	2	57	104	2	16	1073.75
41	:	2	58	106	2	16	1087.76
42	:	2	59	108	2	16	1101.78
43	:	2	60	110	2	16	1115.79
44	:	2	61	112	2	16	1129.81
45	:	2	62	114	2	16	1143.83
46	:	2	63	116	2	16	1157.84
47	:	2	64	118	2	16	1171.86
48	:	2	65	120	2	16	1185.87
49	:	2	66	122	2	16	1199.89
50	:	2	67	124	2	16	1213.9
32	:	3	49	86	2	16	959.605
33	:	3	50	88	2	16	973.621
34	:	3	51	90	2	16	987.637
35	:	3	52	92	2	16	1001.65
36	:	3	53	94	2	16	1015.67
37	:	3	54	96	2	16	1029.68
38	:	3	55	98	2	16	1043.7
39	:	3	56	100	2	16	1057.72
40	:	3	57	102	2	16	1071.73
41	:	3	58	104	2	16	1085.75
42	:	3	59	106	2	16	1099.76
43	:	3	60	108	2	16	1113.78
44	:	3	61	110	2	16	1127.79
45	:	3	62	112	2	16	1141.81
46	:	3	63	114	2	16	1155.83
47	:	3	64	116	2	16	1169.84
48	:	3	65	118	2	16	1183.86
49	:	3	66	120	2	16	1197.87
50	:	3	67	122	2	16	1211.89
32	:	4	49	84	2	16	957.59
33	:	4	50	86	2	16	971.606
34	:	4	51	88	2	16	985.621
35	:	4	52	90	2	16	999.637
36	:	4	53	92	2	16	1013.65
37	:	4	54	94	2	16	1027.67
38	:	4	55	96	2	16	1041.68
39	:	4	56	98	2	16	1055.7
40	:	4	57	100	2	16	1069.72
41	:	4	58	102	2	16	1083.73
42	:	4	59	104	2	16	1097.75
43	:	4	60	106	2	16	1111.76
44	:	4	61	108	2	16	1125.78
45	:	4	62	110	2	16	1139.79
46	:	4	63	112	2	16	1153.81
47	:	4	64	114	2	16	1167.83
48	:	4	65	116	2	16	1181.84
49	:	4	66	118	2	16	1195.86
50	:	4	67	120	2	16	1209.87
32	:	5	49	82	2	16	955.574
33	:	5	50	84	2	16	969.59
34	:	5	51	86	2	16	983.606
35	:	5	52	88	2	16	997.621
36	:	5	53	90	2	16	1011.64
37	:	5	54	92	2	16	1025.65
38	:	5	55	94	2	16	1039.67
39	:	5	56	96	2	16	1053.68
40	:	5	57	98	2	16	1067.7
41	:	5	58	100	2	16	1081.72
42	:	5	59	102	2	16	1095.73
43	:	5	60	104	2	16	1109.75
44	:	5	61	106	2	16	1123.76
45	:	5	62	108	2	16	1137.78
46	:	5	63	110	2	16	1151.79
47	:	5	64	112	2	16	1165.81
48	:	5	65	114	2	16	1179.83
49	:	5	66	116	2	16	1193.84
50	:	5	67	118	2	16	1207.86
32	:	6	49	80	2	16	953.559
33	:	6	50	82	2	16	967.574
34	:	6	51	84	2	16	981.59
35	:	6	52	86	2	16	995.606
36	:	6	53	88	2	16	1009.62
37	:	6	54	90	2	16	1023.64
38	:	6	55	92	2	16	1037.65
39	:	6	56	94	2	16	1051.67
40	:	6	57	96	2	16	1065.68
41	:	6	58	98	2	16	1079.7
42	:	6	59	100	2	16	1093.72
43	:	6	60	102	2	16	1107.73
44	:	6	61	104	2	16	1121.75
45	:	6	62	106	2	16	1135.76
46	:	6	63	108	2	16	1149.78
47	:	6	64	110	2	16	1163.79
48	:	6	65	112	2	16	1177.81
49	:	6	66	114	2	16	1191.83
50	:	6	67	116	2	16	1205.84

## Sheet: GD1a
Name		dbs	C	H	N	O	mass(form[+H2] name[+H2] charge=2)
30	:	0	78	138	4	39	878.455
31	:	0	79	140	4	39	885.462
32	:	0	80	142	4	39	892.47
33	:	0	81	144	4	39	899.478
34	:	0	82	146	4	39	906.486
35	:	0	83	148	4	39	913.494
36	:	0	84	150	4	39	920.502
37	:	0	85	152	4	39	927.51
38	:	0	86	154	4	39	934.517
39	:	0	87	156	4	39	941.525
40	:	0	88	158	4	39	948.533
41	:	0	89	160	4	39	955.541
42	:	0	90	162	4	39	962.549
43	:	0	91	164	4	39	969.557
44	:	0	92	166	4	39	976.564
45	:	0	93	168	4	39	983.572
46	:	0	94	170	4	39	990.58
47	:	0	95	172	4	39	997.588
48	:	0	96	174	4	39	1004.6
49	:	0	97	176	4	39	1011.6
50	:	0	98	178	4	39	1018.61
30	:	1	78	136	4	39	877.447
31	:	1	79	138	4	39	884.455
32	:	1	80	140	4	39	891.462
33	:	1	81	142	4	39	898.47
34	:	1	82	144	4	39	905.478
35	:	1	83	146	4	39	912.486
36	:	1	84	148	4	39	919.494
37	:	1	85	150	4	39	926.502
38	:	1	86	152	4	39	933.51
39	:	1	87	154	4	39	940.517
40	:	1	88	156	4	39	947.525
41	:	1	89	158	4	39	954.533
42	:	1	90	160	4	39	961.541
43	:	1	91	162	4	39	968.549
44	:	1	92	164	4	39	975.557
45	:	1	93	166	4	39	982.564
46	:	1	94	168	4	39	989.572
47	:	1	95	170	4	39	996.58
48	:	1	96	172	4	39	1003.59
49	:	1	97	174	4	39	1010.6
50	:	1	98	176	4	39	1017.6
30	:	2	78	134	4	39	876.439
31	:	2	79	136	4	39	883.447
32	:	2	80	138	4	39	890.455
33	:	2	81	140	4	39	897.463
34	:	2	82	142	4	39	904.47
35	:	2	83	144	4	39	911.478
36	:	2	84	146	4	39	918.486
37	:	2	85	148	4	39	925.494
38	:	2	86	150	4	39	932.502
39	:	2	87	152	4	39	939.51
40	:	2	88	154	4	39	946.517
41	:	2	89	156	4	39	953.525
42	:	2	90	158	4	39	960.533
43	:	2	91	160	4	39	967.541
44	:	2	92	162	4	39	974.549
45	:	2	93	164	4	39	981.557
46	:	2	94	166	4	39	988.565
47	:	2	95	168	4	39	995.572
48	:	2	96	170	4	39	1002.58
49	:	2	97	172	4	39	1009.59
50	:	2	98	174	4	39	1016.6
30	:	3	78	132	4	39	875.431
31	:	3	79	134	4	39	882.439
32	:	3	80	136	4	39	889.447
33	:	3	81	138	4	39	896.455
34	:	3	82	140	4	39	903.463
35	:	3	83	142	4	39	910.47
36	:	3	84	144	4	39	917.478
37	:	3	85	146	4	39	924.486
38	:	3	86	148	4	39	931.494
39	:	3	87	150	4	39	938.502
40	:	3	88	152	4	39	945.51
41	:	3	89	154	4	39	952.517
42	:	3	90	156	4	39	959.525
43	:	3	91	158	4	39	966.533
44	:	3	92	160	4	39	973.541
45	:	3	93	162	4	39	980.549
46	:	3	94	164	4	39	987.557
47	:	3	95	166	4	39	994.565
48	:	3	96	168	4	39	1001.57
49	:	3	97	170	4	39	1008.58
50	:	3	98	172	4	39	1015.59
30	:	4	78	130	4	39	874.423
31	:	4	79	132	4	39	881.431
32	:	4	80	134	4	39	888.439
33	:	4	81	136	4	39	895.447
34	:	4	82	138	4	39	902.455
35	:	4	83	140	4	39	909.463
36	:	4	84	142	4	39	916.47
37	:	4	85	144	4	39	923.478
38	:	4	86	146	4	39	930.486
39	:	4	87	148	4	39	937.494
40	:	4	88	150	4	39	944.502
41	:	4	89	152	4	39	951.51
42	:	4	90	154	4	39	958.518
43	:	4	91	156	4	39	965.525
44	:	4	92	158	4	39	972.533
45	:	4	93	160	4	39	979.541
46	:	4	94	162	4	39	986.549
47	:	4	95	164	4	39	993.557
48	:	4	96	166	4	39	1000.56
49	:	4	97	168	4	39	1007.57
50	:	4	98	170	4	39	1014.58
30	:	5	78	128	4	39	873.416
31	:	5	79	130	4	39	880.423
32	:	5	80	132	4	39	887.431
33	:	5	81	134	4	39	894.439
34	:	5	82	136	4	39	901.447
35	:	5	83	138	4	39	908.455
36	:	5	84	140	4	39	915.463
37	:	5	85	142	4	39	922.471
38	:	5	86	144	4	39	929.478
39	:	5	87	146	4	39	936.486
40	:	5	88	148	4	39	943.494
41	:	5	89	150	4	39	950.502									%Height
42	:	5	90	152	4	39	957.51									1.26
43	:	5	91	154	4	39	964.518									0.43
44	:	5	92	156	4	39	971.525									0.28
45	:	5	93	158	4	39	978.533									97.64
46	:	5	94	160	4	39	985.541									0.09
47	:	5	95	162	4	39	992.549									0.24
48	:	5	96	164	4	39	999.557									0.05
49	:	5	97	166	4	39	1006.56
50	:	5	98	168	4	39	1013.57
30	:	6	78	126	4	39	872.408
31	:	6	79	128	4	39	879.416
32	:	6	80	130	4	39	886.423
33	:	6	81	132	4	39	893.431
34	:	6	82	134	4	39	900.439
35	:	6	83	136	4	39	907.447
36	:	6	84	138	4	39	914.455
37	:	6	85	140	4	39	921.463
38	:	6	86	142	4	39	928.471
39	:	6	87	144	4	39	935.478
40	:	6	88	146	4	39	942.486
41	:	6	89	148	4	39	949.494
42	:	6	90	150	4	39	956.502
43	:	6	91	152	4	39	963.51
44	:	6	92	154	4	39	970.518
45	:	6	93	156	4	39	977.525
46	:	6	94	158	4	39	984.533
47	:	6	95	160	4	39	991.541
48	:	6	96	162	4	39	998.549
49	:	6	97	164	4	39	1005.56
50	:	6	98	166	4	39	1012.56

## Sheet: GD2
Name		dbs	C	H	N	O	mass(form[+H] name[+H])
30	:	0	72	128	4	34	1593.85
31	:	0	73	130	4	34	1607.86
32	:	0	74	132	4	34	1621.88
33	:	0	75	134	4	34	1635.9
34	:	0	76	136	4	34	1649.91
35	:	0	77	138	4	34	1663.93
36	:	0	78	140	4	34	1677.94
37	:	0	79	142	4	34	1691.96
38	:	0	80	144	4	34	1705.97
39	:	0	81	146	4	34	1719.99
40	:	0	82	148	4	34	1734.01
41	:	0	83	150	4	34	1748.02
42	:	0	84	152	4	34	1762.04
43	:	0	85	154	4	34	1776.05
44	:	0	86	156	4	34	1790.07
45	:	0	87	158	4	34	1804.08
46	:	0	88	160	4	34	1818.1
47	:	0	89	162	4	34	1832.12
48	:	0	90	164	4	34	1846.13
49	:	0	91	166	4	34	1860.15
50	:	0	92	168	4	34	1874.16
30	:	1	72	126	4	34	1591.83
31	:	1	73	128	4	34	1605.85
32	:	1	74	130	4	34	1619.86
33	:	1	75	132	4	34	1633.88
34	:	1	76	134	4	34	1647.9
35	:	1	77	136	4	34	1661.91
36	:	1	78	138	4	34	1675.93
37	:	1	79	140	4	34	1689.94
38	:	1	80	142	4	34	1703.96
39	:	1	81	144	4	34	1717.97
40	:	1	82	146	4	34	1731.99
41	:	1	83	148	4	34	1746.01
42	:	1	84	150	4	34	1760.02
43	:	1	85	152	4	34	1774.04
44	:	1	86	154	4	34	1788.05
45	:	1	87	156	4	34	1802.07
46	:	1	88	158	4	34	1816.08
47	:	1	89	160	4	34	1830.1
48	:	1	90	162	4	34	1844.12
49	:	1	91	164	4	34	1858.13
50	:	1	92	166	4	34	1872.15
30	:	2	72	124	4	34	1589.82
31	:	2	73	126	4	34	1603.83
32	:	2	74	128	4	34	1617.85
33	:	2	75	130	4	34	1631.86
34	:	2	76	132	4	34	1645.88
35	:	2	77	134	4	34	1659.9
36	:	2	78	136	4	34	1673.91
37	:	2	79	138	4	34	1687.93
38	:	2	80	140	4	34	1701.94
39	:	2	81	142	4	34	1715.96
40	:	2	82	144	4	34	1729.97
41	:	2	83	146	4	34	1743.99
42	:	2	84	148	4	34	1758.01
43	:	2	85	150	4	34	1772.02
44	:	2	86	152	4	34	1786.04
45	:	2	87	154	4	34	1800.05
46	:	2	88	156	4	34	1814.07
47	:	2	89	158	4	34	1828.08
48	:	2	90	160	4	34	1842.1
49	:	2	91	162	4	34	1856.12
50	:	2	92	164	4	34	1870.13
30	:	3	72	122	4	34	1587.8
31	:	3	73	124	4	34	1601.82
32	:	3	74	126	4	34	1615.83
33	:	3	75	128	4	34	1629.85
34	:	3	76	130	4	34	1643.86
35	:	3	77	132	4	34	1657.88
36	:	3	78	134	4	34	1671.9
37	:	3	79	136	4	34	1685.91
38	:	3	80	138	4	34	1699.93
39	:	3	81	140	4	34	1713.94
40	:	3	82	142	4	34	1727.96
41	:	3	83	144	4	34	1741.97
42	:	3	84	146	4	34	1755.99
43	:	3	85	148	4	34	1770.01
44	:	3	86	150	4	34	1784.02
45	:	3	87	152	4	34	1798.04
46	:	3	88	154	4	34	1812.05
47	:	3	89	156	4	34	1826.07
48	:	3	90	158	4	34	1840.08
49	:	3	91	160	4	34	1854.1
50	:	3	92	162	4	34	1868.12
30	:	4	72	120	4	34	1585.79
31	:	4	73	122	4	34	1599.8
32	:	4	74	124	4	34	1613.82
33	:	4	75	126	4	34	1627.83
34	:	4	76	128	4	34	1641.85
35	:	4	77	130	4	34	1655.86
36	:	4	78	132	4	34	1669.88
37	:	4	79	134	4	34	1683.9
38	:	4	80	136	4	34	1697.91
39	:	4	81	138	4	34	1711.93
40	:	4	82	140	4	34	1725.94
41	:	4	83	142	4	34	1739.96
42	:	4	84	144	4	34	1753.97
43	:	4	85	146	4	34	1767.99
44	:	4	86	148	4	34	1782.01
45	:	4	87	150	4	34	1796.02
46	:	4	88	152	4	34	1810.04
47	:	4	89	154	4	34	1824.05
48	:	4	90	156	4	34	1838.07
49	:	4	91	158	4	34	1852.08
50	:	4	92	160	4	34	1866.1
30	:	5	72	118	4	34	1583.77
31	:	5	73	120	4	34	1597.79
32	:	5	74	122	4	34	1611.8
33	:	5	75	124	4	34	1625.82
34	:	5	76	126	4	34	1639.83
35	:	5	77	128	4	34	1653.85
36	:	5	78	130	4	34	1667.86
37	:	5	79	132	4	34	1681.88
38	:	5	80	134	4	34	1695.9
39	:	5	81	136	4	34	1709.91
40	:	5	82	138	4	34	1723.93
41	:	5	83	140	4	34	1737.94
42	:	5	84	142	4	34	1751.96
43	:	5	85	144	4	34	1765.97
44	:	5	86	146	4	34	1779.99
45	:	5	87	148	4	34	1794.01
46	:	5	88	150	4	34	1808.02
47	:	5	89	152	4	34	1822.04
48	:	5	90	154	4	34	1836.05
49	:	5	91	156	4	34	1850.07
50	:	5	92	158	4	34	1864.08
30	:	6	72	116	4	34	1581.76
31	:	6	73	118	4	34	1595.77
32	:	6	74	120	4	34	1609.79
33	:	6	75	122	4	34	1623.8
34	:	6	76	124	4	34	1637.82
35	:	6	77	126	4	34	1651.83
36	:	6	78	128	4	34	1665.85
37	:	6	79	130	4	34	1679.87
38	:	6	80	132	4	34	1693.88
39	:	6	81	134	4	34	1707.9
40	:	6	82	136	4	34	1721.91
41	:	6	83	138	4	34	1735.93
42	:	6	84	140	4	34	1749.94
43	:	6	85	142	4	34	1763.96
44	:	6	86	144	4	34	1777.97
45	:	6	87	146	4	34	1791.99
46	:	6	88	148	4	34	1806.01
47	:	6	89	150	4	34	1820.02
48	:	6	90	152	4	34	1834.04
49	:	6	91	154	4	34	1848.05
50	:	6	92	156	4	34	1862.07

## Sheet: GD3
Name		dbs	C	H	N	O	mass(form[+H] name[+H])
30	:	0	64	115	3	29	1390.77
31	:	0	65	117	3	29	1404.79
32	:	0	66	119	3	29	1418.8
33	:	0	67	121	3	29	1432.82
34	:	0	68	123	3	29	1446.83
35	:	0	69	125	3	29	1460.85
36	:	0	70	127	3	29	1474.86
37	:	0	71	129	3	29	1488.88
38	:	0	72	131	3	29	1502.89
39	:	0	73	133	3	29	1516.91
40	:	0	74	135	3	29	1530.93
41	:	0	75	137	3	29	1544.94
42	:	0	76	139	3	29	1558.96
43	:	0	77	141	3	29	1572.97
44	:	0	78	143	3	29	1586.99
45	:	0	79	145	3	29	1601
46	:	0	80	147	3	29	1615.02
47	:	0	81	149	3	29	1629.04
48	:	0	82	151	3	29	1643.05
49	:	0	83	153	3	29	1657.07
50	:	0	84	155	3	29	1671.08
30	:	1	64	113	3	29	1388.75
31	:	1	65	115	3	29	1402.77
32	:	1	66	117	3	29	1416.79
33	:	1	67	119	3	29	1430.8
34	:	1	68	121	3	29	1444.82
35	:	1	69	123	3	29	1458.83
36	:	1	70	125	3	29	1472.85
37	:	1	71	127	3	29	1486.86
38	:	1	72	129	3	29	1500.88
39	:	1	73	131	3	29	1514.9
40	:	1	74	133	3	29	1528.91
41	:	1	75	135	3	29	1542.93
42	:	1	76	137	3	29	1556.94
43	:	1	77	139	3	29	1570.96
44	:	1	78	141	3	29	1584.97
45	:	1	79	143	3	29	1598.99
46	:	1	80	145	3	29	1613
47	:	1	81	147	3	29	1627.02
48	:	1	82	149	3	29	1641.04
49	:	1	83	151	3	29	1655.05
50	:	1	84	153	3	29	1669.07
30	:	2	64	111	3	29	1386.74
31	:	2	65	113	3	29	1400.75
32	:	2	66	115	3	29	1414.77
33	:	2	67	117	3	29	1428.79
34	:	2	68	119	3	29	1442.8
35	:	2	69	121	3	29	1456.82
36	:	2	70	123	3	29	1470.83
37	:	2	71	125	3	29	1484.85
38	:	2	72	127	3	29	1498.86
39	:	2	73	129	3	29	1512.88
40	:	2	74	131	3	29	1526.9
41	:	2	75	133	3	29	1540.91
42	:	2	76	135	3	29	1554.93
43	:	2	77	137	3	29	1568.94
44	:	2	78	139	3	29	1582.96
45	:	2	79	141	3	29	1596.97
46	:	2	80	143	3	29	1610.99
47	:	2	81	145	3	29	1625.01
48	:	2	82	147	3	29	1639.02
49	:	2	83	149	3	29	1653.04
50	:	2	84	151	3	29	1667.05
30	:	3	64	109	3	29	1384.72
31	:	3	65	111	3	29	1398.74
32	:	3	66	113	3	29	1412.75
33	:	3	67	115	3	29	1426.77
34	:	3	68	117	3	29	1440.79
35	:	3	69	119	3	29	1454.8
36	:	3	70	121	3	29	1468.82
37	:	3	71	123	3	29	1482.83
38	:	3	72	125	3	29	1496.85
39	:	3	73	127	3	29	1510.86
40	:	3	74	129	3	29	1524.88
41	:	3	75	131	3	29	1538.9
42	:	3	76	133	3	29	1552.91
43	:	3	77	135	3	29	1566.93
44	:	3	78	137	3	29	1580.94
45	:	3	79	139	3	29	1594.96
46	:	3	80	141	3	29	1608.97
47	:	3	81	143	3	29	1622.99
48	:	3	82	145	3	29	1637.01
49	:	3	83	147	3	29	1651.02
50	:	3	84	149	3	29	1665.04
30	:	4	64	107	3	29	1382.71
31	:	4	65	109	3	29	1396.72
32	:	4	66	111	3	29	1410.74
33	:	4	67	113	3	29	1424.75
34	:	4	68	115	3	29	1438.77
35	:	4	69	117	3	29	1452.79
36	:	4	70	119	3	29	1466.8
37	:	4	71	121	3	29	1480.82
38	:	4	72	123	3	29	1494.83
39	:	4	73	125	3	29	1508.85
40	:	4	74	127	3	29	1522.86
41	:	4	75	129	3	29	1536.88
42	:	4	76	131	3	29	1550.9
43	:	4	77	133	3	29	1564.91
44	:	4	78	135	3	29	1578.93
45	:	4	79	137	3	29	1592.94
46	:	4	80	139	3	29	1606.96
47	:	4	81	141	3	29	1620.97
48	:	4	82	143	3	29	1634.99
49	:	4	83	145	3	29	1649.01
50	:	4	84	147	3	29	1663.02

## Sheet: GT1
Name		dbs	C	H	N	O	mass(form[+H2] name[+H2] charge=2)
32	:	0	91	159	5	47	1038.02
33	:	0	92	161	5	47	1045.03
34	:	0	93	163	5	47	1052.03
35	:	0	94	165	5	47	1059.04
36	:	0	95	167	5	47	1066.05
37	:	0	96	169	5	47	1073.06
38	:	0	97	171	5	47	1080.07
39	:	0	98	173	5	47	1087.07
40	:	0	99	175	5	47	1094.08
41	:	0	100	177	5	47	1101.09
42	:	0	101	179	5	47	1108.1
43	:	0	102	181	5	47	1115.1
44	:	0	103	183	5	47	1122.11
45	:	0	104	185	5	47	1129.12
46	:	0	105	187	5	47	1136.13
47	:	0	106	189	5	47	1143.14
48	:	0	107	191	5	47	1150.14
49	:	0	108	193	5	47	1157.15
50	:	0	109	195	5	47	1164.16
32	:	1	91	157	5	47	1037.01
33	:	1	92	159	5	47	1044.02
34	:	1	93	161	5	47	1051.03
35	:	1	94	163	5	47	1058.03
36	:	1	95	165	5	47	1065.04
37	:	1	96	167	5	47	1072.05
38	:	1	97	169	5	47	1079.06
39	:	1	98	171	5	47	1086.07
40	:	1	99	173	5	47	1093.07
41	:	1	100	175	5	47	1100.08
42	:	1	101	177	5	47	1107.09
43	:	1	102	179	5	47	1114.1
44	:	1	103	181	5	47	1121.1
45	:	1	104	183	5	47	1128.11
46	:	1	105	185	5	47	1135.12
47	:	1	106	187	5	47	1142.13
48	:	1	107	189	5	47	1149.14
49	:	1	108	191	5	47	1156.14
50	:	1	109	193	5	47	1163.15
32	:	2	91	155	5	47	1036
33	:	2	92	157	5	47	1043.01
34	:	2	93	159	5	47	1050.02
35	:	2	94	161	5	47	1057.03
36	:	2	95	163	5	47	1064.03
37	:	2	96	165	5	47	1071.04
38	:	2	97	167	5	47	1078.05
39	:	2	98	169	5	47	1085.06
40	:	2	99	171	5	47	1092.07
41	:	2	100	173	5	47	1099.07
42	:	2	101	175	5	47	1106.08
43	:	2	102	177	5	47	1113.09
44	:	2	103	179	5	47	1120.1
45	:	2	104	181	5	47	1127.1
46	:	2	105	183	5	47	1134.11
47	:	2	106	185	5	47	1141.12
48	:	2	107	187	5	47	1148.13
49	:	2	108	189	5	47	1155.14
50	:	2	109	191	5	47	1162.14
32	:	4	89	151	5	47	1033.99
33	:	4	90	153	5	47	1040.99
34	:	4	91	155	5	47	1048
35	:	4	92	157	5	47	1055.01
36	:	4	93	159	5	47	1062.02
37	:	4	94	161	5	47	1069.03
38	:	4	95	163	5	47	1076.03
39	:	4	96	165	5	47	1083.04
40	:	4	97	167	5	47	1090.05
41	:	4	98	169	5	47	1097.06
42	:	4	99	171	5	47	1104.07
43	:	4	100	173	5	47	1111.07
44	:	4	101	175	5	47	1118.08
45	:	4	102	177	5	47	1125.09
46	:	4	103	179	5	47	1132.1
47	:	4	104	181	5	47	1139.1
48	:	4	105	183	5	47	1146.11
49	:	4	106	185	5	47	1153.12
50	:	4	107	187	5	47	1160.13

## Sheet: GT3
Name		dbs	C	H	N	O	mass(form[+H] name[+H])
30	:	0	75	132	4	37	1681.86
30	:	1	75	130	4	37	1679.85
30	:	2	75	128	4	37	1677.83
31	:	0	76	134	4	37	1695.88
31	:	1	76	132	4	37	1693.86
31	:	2	76	130	4	37	1691.85
32	:	0	77	136	4	37	1709.9
32	:	1	77	134	4	37	1707.88
32	:	2	77	132	4	37	1705.86
33	:	0	78	138	4	37	1723.91
33	:	1	78	136	4	37	1721.9
33	:	2	78	134	4	37	1719.88
34	:	0	79	140	4	37	1737.93
34	:	1	79	138	4	37	1735.91
34	:	2	79	136	4	37	1733.9
35	:	0	80	142	4	37	1751.94
35	:	1	80	140	4	37	1749.93
35	:	2	80	138	4	37	1747.91
36	:	0	81	144	4	37	1765.96
36	:	1	81	142	4	37	1763.94
36	:	2	81	140	4	37	1761.93
37	:	0	82	146	4	37	1779.97
37	:	1	82	144	4	37	1777.96
37	:	2	82	142	4	37	1775.94
38	:	0	83	148	4	37	1793.99
38	:	1	83	146	4	37	1791.97
38	:	2	83	144	4	37	1789.96
39	:	0	84	150	4	37	1808.01
39	:	1	84	148	4	37	1805.99
39	:	2	84	146	4	37	1803.97
40	:	0	85	152	4	37	1822.02
40	:	1	85	150	4	37	1820.01
40	:	2	85	148	4	37	1817.99
41	:	0	86	154	4	37	1836.04
41	:	1	86	152	4	37	1834.02
41	:	2	86	150	4	37	1832.01
42	:	0	87	156	4	37	1850.05
42	:	1	87	154	4	37	1848.04
42	:	2	87	152	4	37	1846.02
43	:	0	88	158	4	37	1864.07
43	:	1	88	156	4	37	1862.05
43	:	2	88	154	4	37	1860.04
44	:	0	89	160	4	37	1878.08
44	:	1	89	158	4	37	1876.07
44	:	2	89	156	4	37	1874.05
45	:	0	90	162	4	37	1892.1
45	:	1	90	160	4	37	1890.08
45	:	2	90	158	4	37	1888.07
46	:	0	91	164	4	37	1906.11
46	:	1	91	162	4	37	1904.1
46	:	2	91	160	4	37	1902.08
47	:	0	92	166	4	37	1920.13
47	:	1	92	164	4	37	1918.11
47	:	2	92	162	4	37	1916.1
48	:	0	93	168	4	37	1934.15
48	:	1	93	166	4	37	1932.13
48	:	2	93	164	4	37	1930.11

## Sheet: GQ1
Name		dbs	C	H	N	O	mass(form[+H2] name[+H2] charge=2)
32	:	0	102	176	6	55	1183.57
33	:	0	103	178	6	55	1190.57
34	:	0	104	180	6	55	1197.58
35	:	0	105	182	6	55	1204.59
36	:	0	106	184	6	55	1211.6
37	:	0	107	186	6	55	1218.6
38	:	0	108	188	6	55	1225.61
39	:	0	109	190	6	55	1232.62
40	:	0	110	192	6	55	1239.63
41	:	0	111	194	6	55	1246.64
42	:	0	112	196	6	55	1253.64
43	:	0	113	198	6	55	1260.65
44	:	0	114	200	6	55	1267.66
45	:	0	115	202	6	55	1274.67
46	:	0	116	204	6	55	1281.68
47	:	0	117	206	6	55	1288.68
48	:	0	118	208	6	55	1295.69
49	:	0	119	210	6	55	1302.7
50	:	0	120	212	6	55	1309.71
32	:	1	102	174	6	55	1182.56
33	:	1	103	176	6	55	1189.57
34	:	1	104	178	6	55	1196.57
35	:	1	105	180	6	55	1203.58
36	:	1	106	182	6	55	1210.59
37	:	1	107	184	6	55	1217.6
38	:	1	108	186	6	55	1224.6
39	:	1	109	188	6	55	1231.61
40	:	1	110	190	6	55	1238.62
41	:	1	111	192	6	55	1245.63
42	:	1	112	194	6	55	1252.64
43	:	1	113	196	6	55	1259.64
44	:	1	114	198	6	55	1266.65
45	:	1	115	200	6	55	1273.66
46	:	1	116	202	6	55	1280.67
47	:	1	117	204	6	55	1287.68
48	:	1	118	206	6	55	1294.68
49	:	1	119	208	6	55	1301.69
50	:	1	120	210	6	55	1308.7
32	:	2	102	172	6	55	1181.55
33	:	2	103	174	6	55	1188.56
34	:	2	104	176	6	55	1195.57
35	:	2	105	178	6	55	1202.57
36	:	2	106	180	6	55	1209.58
37	:	2	107	182	6	55	1216.59
38	:	2	108	184	6	55	1223.6
39	:	2	109	186	6	55	1230.6
40	:	2	110	188	6	55	1237.61
41	:	2	111	190	6	55	1244.62
42	:	2	112	192	6	55	1251.63
43	:	2	113	194	6	55	1258.64
44	:	2	114	196	6	55	1265.64
45	:	2	115	198	6	55	1272.65
46	:	2	116	200	6	55	1279.66
47	:	2	117	202	6	55	1286.67
48	:	2	118	204	6	55	1293.68
49	:	2	119	206	6	55	1300.68
50	:	2	120	208	6	55	1307.69
32	:	4	102	168	6	55	1179.53
33	:	4	103	170	6	55	1186.54
34	:	4	104	172	6	55	1193.55
35	:	4	105	174	6	55	1200.56
36	:	4	106	176	6	55	1207.57
37	:	4	107	178	6	55	1214.57
38	:	4	108	180	6	55	1221.58
39	:	4	109	182	6	55	1228.59
40	:	4	110	184	6	55	1235.6
41	:	4	111	186	6	55	1242.61
42	:	4	112	188	6	55	1249.61
43	:	4	113	190	6	55	1256.62
44	:	4	114	192	6	55	1263.63
45	:	4	115	194	6	55	1270.64
46	:	4	116	196	6	55	1277.64
47	:	4	117	198	6	55	1284.65
48	:	4	118	200	6	55	1291.66
49	:	4	119	202	6	55	1298.67
50	:	4	120	204	6	55	1305.68

[truncated: 16 more sheets: GP1, Cer, Cer1P, S1P, HexCer, SphBase, Gb3, LacCer, N-Acetyl-psychosine, Fucosylated GM1, GA2, Lyso GM1, Gg4, Gb4, Psychosine,  Glucosylsphingosine]
