# Supplementary material for: Comprehensive profiling of serum glycosphingolipids to discover the diagnostic biomarkers of lung cancer and uncover the variation of glycosphingolipid networks in different lung cancer subtypes
Source: Royal Society of Chemistry journal article supplement (doi:10.1039/d4ay01685h), 2024-01-01
Supplement: d4ay01685h2.xlsx [file d4ay01685h2.xlsx]

## Sheet: Fucosylated GM1
Name		dbs	C	H	N	O	mass(form[-H] name[-H])
30	:	0	73	131	3	35	1608.85
31	:	0	74	133	3	35	1622.86
32	:	0	75	135	3	35	1636.88
33	:	0	76	137	3	35	1650.9
34	:	0	77	139	3	35	1664.91
35	:	0	78	141	3	35	1678.93
36	:	0	79	143	3	35	1692.94
37	:	0	80	145	3	35	1706.96
38	:	0	81	147	3	35	1720.97
39	:	0	82	149	3	35	1734.99
40	:	0	83	151	3	35	1749.01
41	:	0	84	153	3	35	1763.02
42	:	0	85	155	3	35	1777.04
43	:	0	86	157	3	35	1791.05
44	:	0	87	159	3	35	1805.07
45	:	0	88	161	3	35	1819.08
46	:	0	89	163	3	35	1833.1
47	:	0	90	165	3	35	1847.12
48	:	0	91	167	3	35	1861.13
49	:	0	92	169	3	35	1875.15
50	:	0	93	171	3	35	1889.16
30	:	1	73	129	3	35	1606.83
31	:	1	74	131	3	35	1620.85
32	:	1	75	133	3	35	1634.86
33	:	1	76	135	3	35	1648.88
34	:	1	77	137	3	35	1662.9
35	:	1	78	139	3	35	1676.91
36	:	1	79	141	3	35	1690.93
37	:	1	80	143	3	35	1704.94
38	:	1	81	145	3	35	1718.96
39	:	1	82	147	3	35	1732.97
40	:	1	83	149	3	35	1746.99
41	:	1	84	151	3	35	1761.01
42	:	1	85	153	3	35	1775.02
43	:	1	86	155	3	35	1789.04
44	:	1	87	157	3	35	1803.05
45	:	1	88	159	3	35	1817.07
46	:	1	89	161	3	35	1831.08
47	:	1	90	163	3	35	1845.1
48	:	1	91	165	3	35	1859.12
49	:	1	92	167	3	35	1873.13
50	:	1	93	169	3	35	1887.15
30	:	2	73	127	3	35	1604.82
31	:	2	74	129	3	35	1618.83
32	:	2	75	131	3	35	1632.85
33	:	2	76	133	3	35	1646.86
34	:	2	77	135	3	35	1660.88
35	:	2	78	137	3	35	1674.9
36	:	2	79	139	3	35	1688.91
37	:	2	80	141	3	35	1702.93
38	:	2	81	143	3	35	1716.94
39	:	2	82	145	3	35	1730.96
40	:	2	83	147	3	35	1744.97
41	:	2	84	149	3	35	1758.99
42	:	2	85	151	3	35	1773.01
43	:	2	86	153	3	35	1787.02
44	:	2	87	155	3	35	1801.04
45	:	2	88	157	3	35	1815.05
46	:	2	89	159	3	35	1829.07
47	:	2	90	161	3	35	1843.08
48	:	2	91	163	3	35	1857.1
49	:	2	92	165	3	35	1871.12
50	:	2	93	167	3	35	1885.13

## Sheet: Sulfatides
Name		dbs	C	H	N	O	S	mass(form[-H] name[-H])
32	:	0	38	75	1	11	1	752.499
33	:	0	39	77	1	11	1	766.514
34	:	0	40	79	1	11	1	780.53
35	:	0	41	81	1	11	1	794.546
36	:	0	42	83	1	11	1	808.561
37	:	0	43	85	1	11	1	822.577
38	:	0	44	87	1	11	1	836.593
39	:	0	45	89	1	11	1	850.609
40	:	0	46	91	1	11	1	864.624
41	:	0	47	93	1	11	1	878.64
42	:	0	48	95	1	11	1	892.656
43	:	0	49	97	1	11	1	906.671
44	:	0	50	99	1	11	1	920.687
45	:	0	51	101	1	11	1	934.703
46	:	0	52	103	1	11	1	948.718
47	:	0	53	105	1	11	1	962.734
48	:	0	54	107	1	11	1	976.75
49	:	0	55	109	1	11	1	990.766
50	:	0	56	111	1	11	1	1004.78
32	:	1	38	73	1	11	1	750.483
33	:	1	39	75	1	11	1	764.499
34	:	1	40	77	1	11	1	778.514
35	:	1	41	79	1	11	1	792.53
36	:	1	42	81	1	11	1	806.546
37	:	1	43	83	1	11	1	820.562
38	:	1	44	85	1	11	1	834.577
39	:	1	45	87	1	11	1	848.593
40	:	1	46	89	1	11	1	862.609
41	:	1	47	91	1	11	1	876.624
42	:	1	48	93	1	11	1	890.64
43	:	1	49	95	1	11	1	904.656
44	:	1	50	97	1	11	1	918.671
45	:	1	51	99	1	11	1	932.687
46	:	1	52	101	1	11	1	946.703
47	:	1	53	103	1	11	1	960.719
48	:	1	54	105	1	11	1	974.734
49	:	1	55	107	1	11	1	988.75
50	:	1	56	109	1	11	1	1002.77
32	:	2	38	71	1	11	1	748.467
33	:	2	39	73	1	11	1	762.483
34	:	2	40	75	1	11	1	776.499
35	:	2	41	77	1	11	1	790.514
36	:	2	42	79	1	11	1	804.53
37	:	2	43	81	1	11	1	818.546
38	:	2	44	83	1	11	1	832.562
39	:	2	45	85	1	11	1	846.577
40	:	2	46	87	1	11	1	860.593
41	:	2	47	89	1	11	1	874.609
42	:	2	48	91	1	11	1	888.624
43	:	2	49	93	1	11	1	902.64
44	:	2	50	95	1	11	1	916.656
45	:	2	51	97	1	11	1	930.672
46	:	2	52	99	1	11	1	944.687
47	:	2	53	101	1	11	1	958.703
48	:	2	54	103	1	11	1	972.719
49	:	2	55	105	1	11	1	986.734
50	:	2	56	107	1	11	1	1000.75
32	:	3	38	69	1	11	1	746.452
33	:	3	39	71	1	11	1	760.467
34	:	3	40	73	1	11	1	774.483
35	:	3	41	75	1	11	1	788.499
36	:	3	42	77	1	11	1	802.515
37	:	3	43	79	1	11	1	816.53
38	:	3	44	81	1	11	1	830.546
39	:	3	45	83	1	11	1	844.562
40	:	3	46	85	1	11	1	858.577
41	:	3	47	87	1	11	1	872.593
42	:	3	48	89	1	11	1	886.609
43	:	3	49	91	1	11	1	900.625
44	:	3	50	93	1	11	1	914.64
45	:	3	51	95	1	11	1	928.656
46	:	3	52	97	1	11	1	942.672
47	:	3	53	99	1	11	1	956.687
48	:	3	54	101	1	11	1	970.703
49	:	3	55	103	1	11	1	984.719
50	:	3	56	105	1	11	1	998.734
32	:	4	38	69	1	11	1	744.436
33	:	4	39	71	1	11	1	758.452
34	:	4	40	73	1	11	1	772.468
35	:	4	41	75	1	11	1	786.483
36	:	4	42	77	1	11	1	800.499
37	:	4	43	79	1	11	1	814.515
38	:	4	44	81	1	11	1	828.53
39	:	4	45	83	1	11	1	842.546
40	:	4	46	85	1	11	1	856.562
41	:	4	47	87	1	11	1	870.578
42	:	4	48	89	1	11	1	884.593
43	:	4	49	91	1	11	1	898.609
44	:	4	50	93	1	11	1	912.625
45	:	4	51	95	1	11	1	926.64
46	:	4	52	97	1	11	1	940.656
47	:	4	53	99	1	11	1	954.672
48	:	4	54	101	1	11	1	968.687
49	:	4	55	103	1	11	1	982.703
50	:	4	56	105	1	11	1	996.719
