# Supplementary material for: Comprehensive profiling of serum glycosphingolipids to discover the diagnostic biomarkers of lung cancer and uncover the variation of glycosphingolipid networks in different lung cancer subtypes
Source: Royal Society of Chemistry journal article supplement (doi:10.1039/d4ay01685h), 2024-01-01

➤ **Representative total ion chromatogram (TIC) of serum sample**

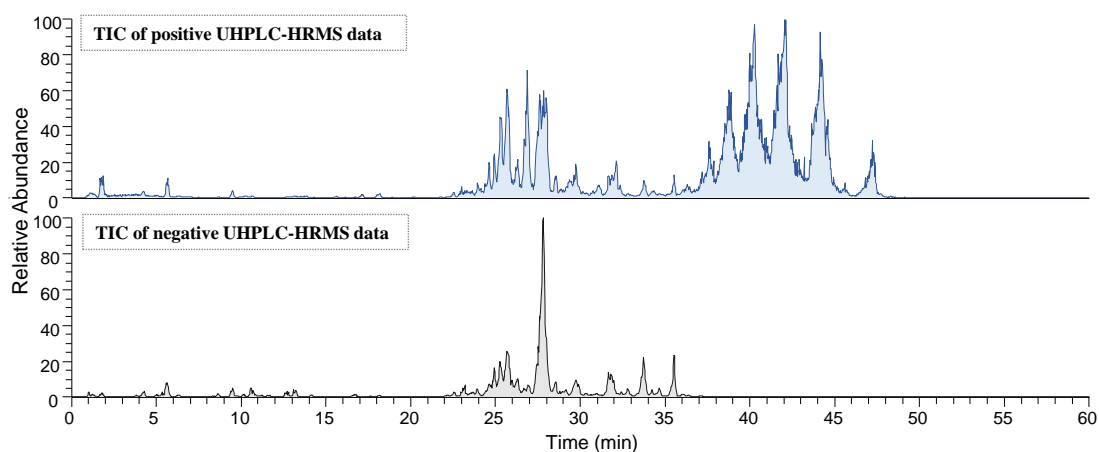

➤ **Typical MS/MS and fragmentation pattern of GA2**

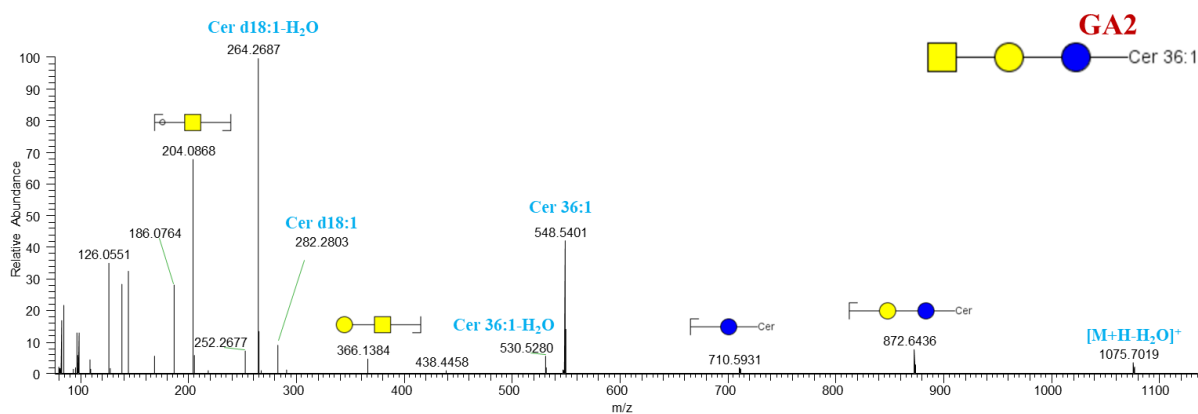

➤ **Typical MS/MS and fragmentation pattern of Gg4**

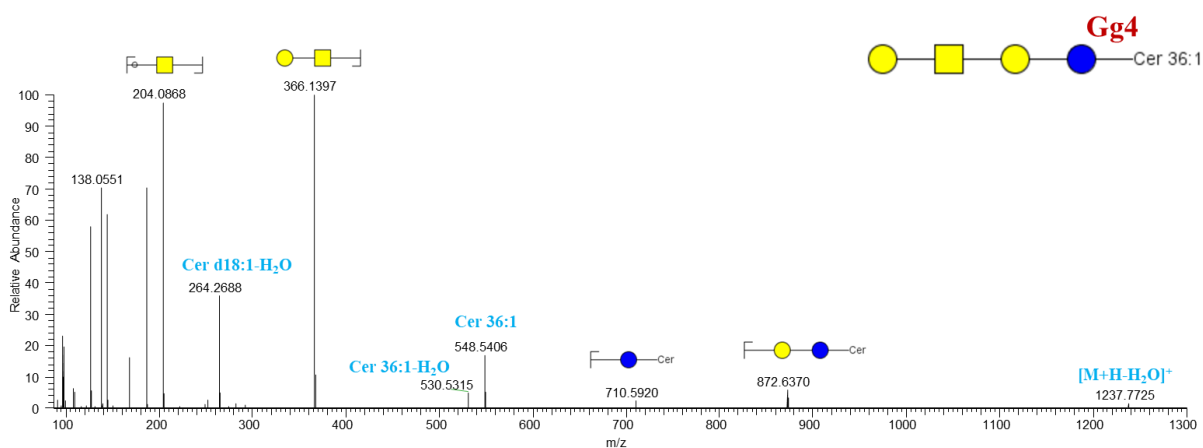

➤ **Typical MS/MS and fragmentation pattern of GM1**

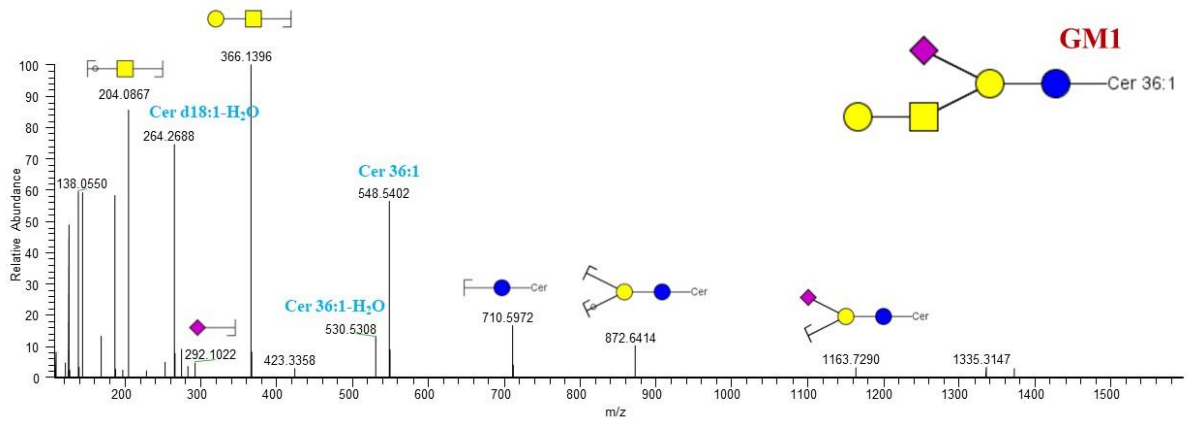

➤ **Typical MS/MS and fragmentation pattern of GM2**

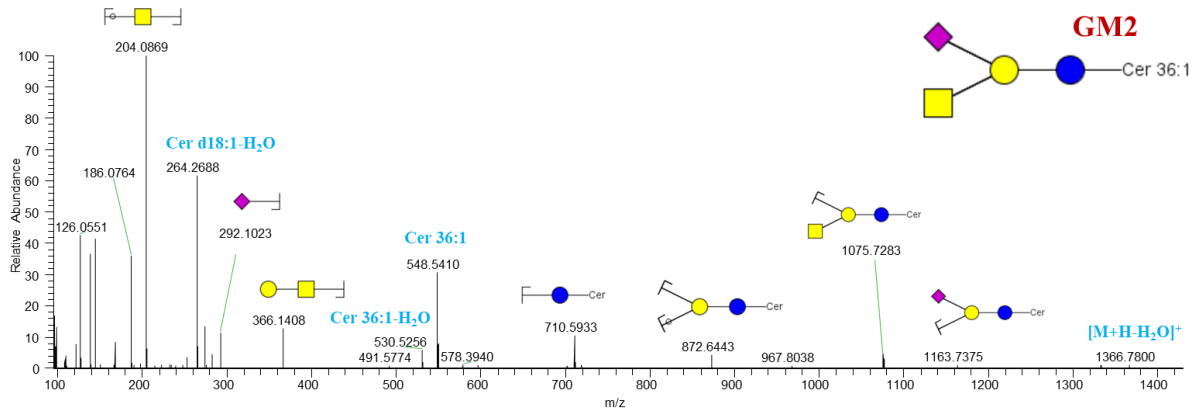

➤ **Typical MS/MS and fragmentation pattern of GM3**

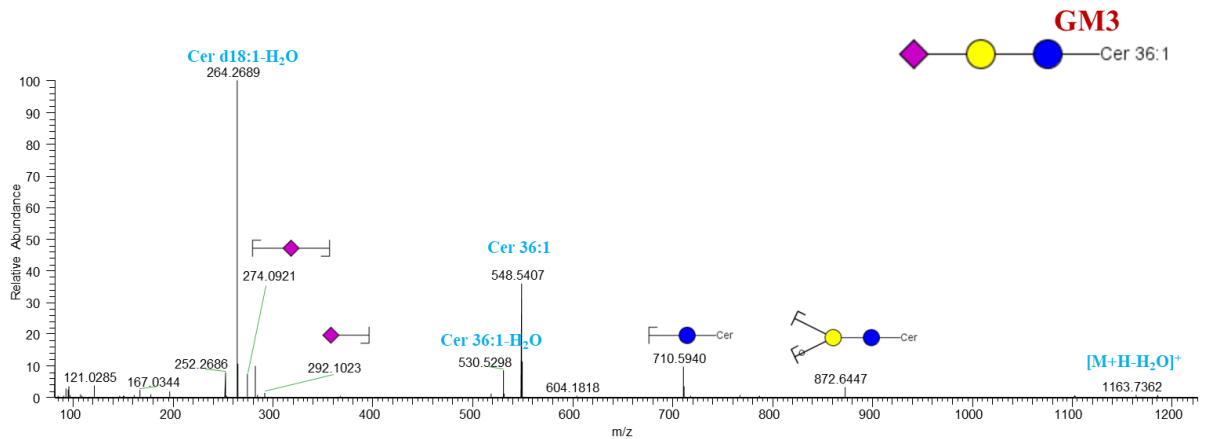

➤ **Typical MS/MS and fragmentation pattern of GD1a**

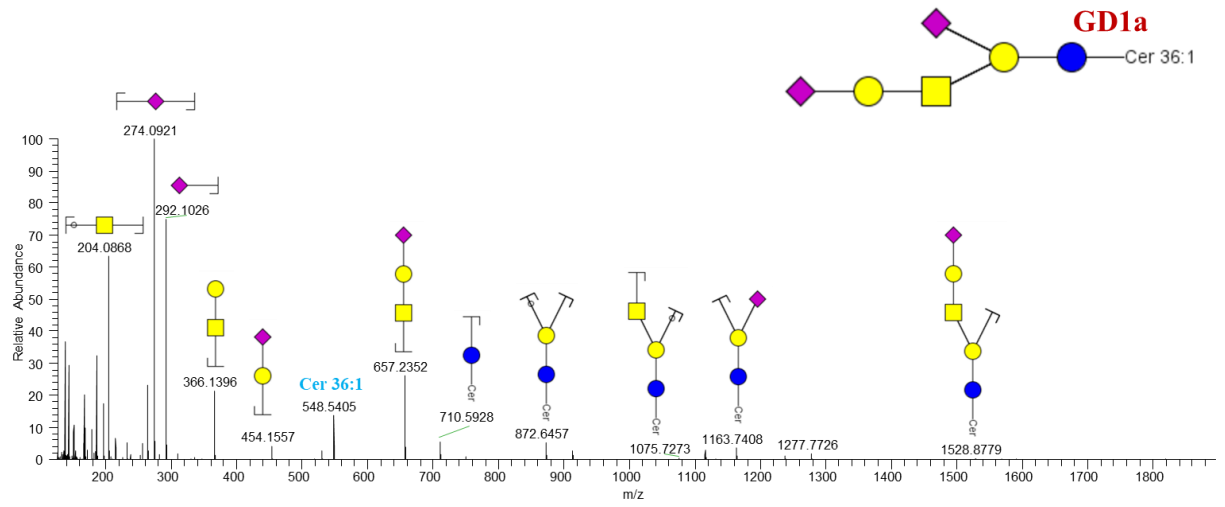

➤ **Typical MS/MS and fragmentation pattern of GD1b**

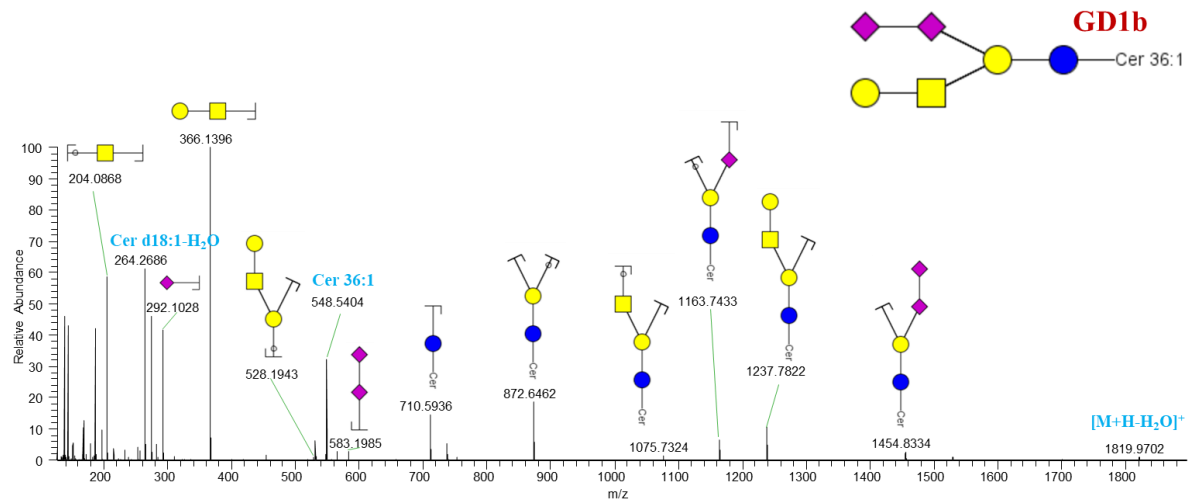

➤ **Typical MS/MS and fragmentation pattern of GD2**

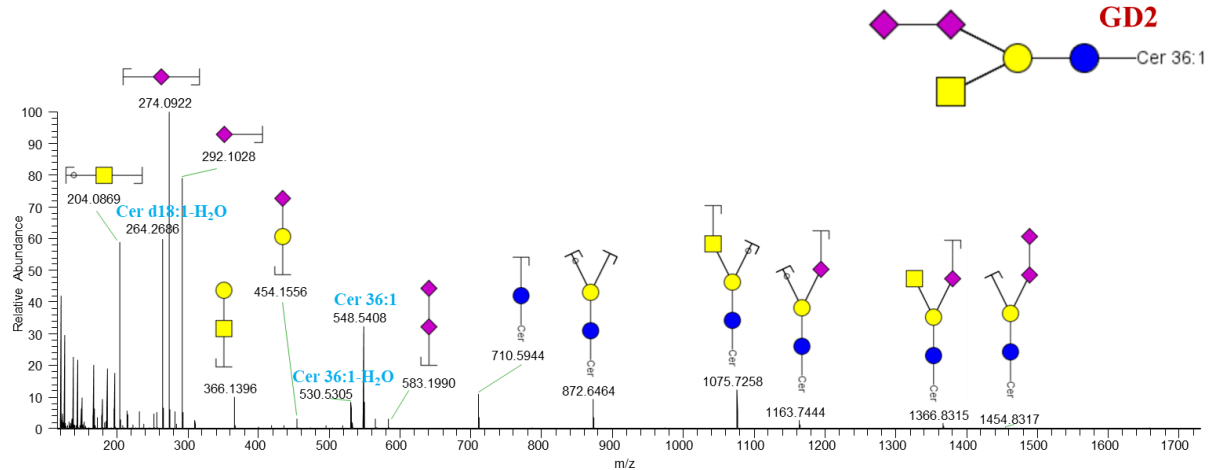

➤ **Typical MS/MS and fragmentation pattern of GT1**

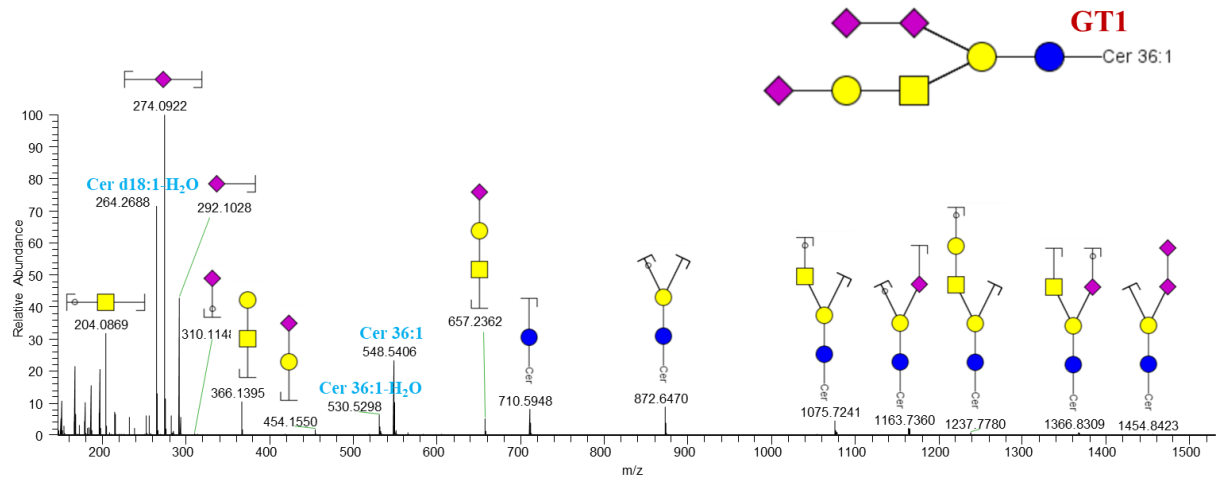

➤ **Typical MS/MS and fragmentation pattern of Fucosylated GM1**

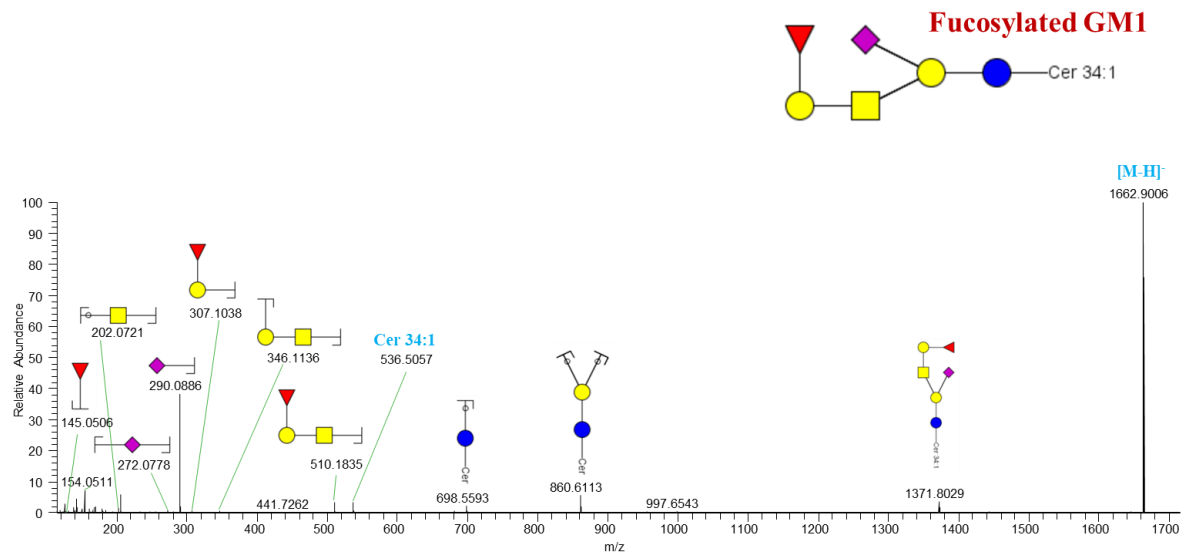

Supplement: d4ay01685h3.pdf [file d4ay01685h3.pdf]
