# Supplementary material for: Comprehensive profiling of serum glycosphingolipids to discover the diagnostic biomarkers of lung cancer and uncover the variation of glycosphingolipid networks in different lung cancer subtypes
Source: Royal Society of Chemistry journal article supplement (doi:10.1039/d4ay01685h), 2024-01-01
Supplement: d4ay01685h4.xlsx [file d4ay01685h4.xlsx]

## Sheet: Sheet1
					Supplementary Data 3. 1710 glycosphingolipids with CV values less than 30% in the QC samples
Name	Glycosphingolipid	RT [min]	Formula	Annot. DeltaMass [ppm]	Calc. MW	m/z	Reference Ion	Area: A1.raw (F110)	Area: A10.raw (F101)	Area: A11.raw (F100)	Area: A12.raw (F99)	Area: A13.raw (F98)	Area: A14.raw (F97)	Area: A15.raw (F96)	Area: A16.raw (F95)	Area: A17.raw (F94)	Area: A18.raw (F93)	Area: A19.raw (F92)	Area: A2.raw (F109)	Area: A20.raw (F91)	Area: A22.raw (F86)	Area: A23.raw (F85)	Area: A24.raw (F84)	Area: A25.raw (F83)	Area: A26.raw (F82)	Area: A27.raw (F81)	Area: A28.raw (F80)	Area: A29.raw (F79)	Area: A3.raw (F108)	Area: A30.raw (F78)	Area: A31.raw (F77)	Area: A32.raw (F76)	Area: A33.raw (F75)	Area: A34.raw (F74)	Area: A35.raw (F73)	Area: A36.raw (F72)	Area: A37.raw (F71)	Area: A38.raw (F70)	Area: A39.raw (F69)	Area: A4.raw (F107)	Area: A40.raw (F68)	Area: A41.raw (F64)	Area: A42.raw (F63)	Area: A43.raw (F62)	Area: A44.raw (F61)	Area: A5.raw (F106)	Area: A7.raw (F104)	Area: A8.raw (F103)	Area: A9.raw (F102)
Fucosylated GM1 d32:2_27.03	Fucosylated GM1 d32:2	27.03	C75 H131 N3 O35	-9.95	1633.84	817.927	[M+2H]+2	891915	1.44411e+06	1.77844e+06	1.91702e+06	1.42671e+06	788722	1.54177e+06	1.11564e+06	1.23482e+06	1.52716e+06	1.84098e+06	1.15561e+06	1.31211e+06	1.05892e+06	1.01456e+06	1.251e+06	1.3194e+06	1.02605e+06	1.04552e+06	1.18869e+06	1.20962e+06	1.41121e+06	1.30728e+06	1.03678e+06	1.2074e+06	1.68132e+06	1.1342e+06	1.70281e+06	956812	844394	1.34911e+06	1.41192e+06	1.36196e+06	1.57741e+06	1.2647e+06	1.26004e+06	1.48695e+06	1.4556e+06	1.05685e+06	1.40322e+06	1.33835e+06	1.7061e+06
Fucosylated GM1 d33:1_20.99	Fucosylated GM1 d33:1	20.99	C76 H135 N3 O35	0.02	1649.89	1648.88	[M-H]-1	147837	158955	71667.9	122671	135920	92094.5	119288	145011	107363	77965.2	104451	117144	135838	38829.1	129241	145697	98956.3	144594	124774	97698.3	120587	132921	84203.4	159385	106003	159037	116701	104837	117908	158753	84975.5	91036.6	37673.1	199484	191991	152147	136831	94415.4	37587.5	84245.8	97710	110976
Fucosylated GM1 d34:3_27.11	Fucosylated GM1 d34:3	27.11	C77 H133 N3 O35	4.01	1659.88	1658.87	[M-H]-1	1.00037e+06	1.22597e+06	1.60021e+06	3.20382e+06	1.78095e+06	1.32901e+06	988831	823661	3.1439e+06	2.18994e+06	2.2441e+06	1.39303e+06	1.16003e+06	2.72975e+06	1.08019e+06	1.32165e+06	2.59826e+06	1.12898e+06	1.31323e+06	3.07607e+06	1.40439e+06	1.05619e+06	1.64308e+06	716864	1.46272e+06	1.56723e+06	1.0332e+06	2.09032e+06	1.79003e+06	1.03096e+06	1.93585e+06	1.19198e+06	1.32905e+06	1.4407e+06	1.09606e+06	1.40163e+06	1.56117e+06	2.53998e+06	1.85892e+06	2.92718e+06	1.56019e+06	1.13198e+06
Fucosylated GM1 d39:4_8.38	Fucosylated GM1 d39:4	8.38	C82 H141 N3 O35	-3.48	1727.93	576.983	[M+3H]+3	53338	59882.5	59646.9	54375.7	65909	71379.3	111129	57339.8	61029.9	56012.1	55137.3	69337.9	81738.1	51567.3	52868.7	48653.2	50025.5	46725.1	81636.5	77762.7	108648	87349.7	98898.9	93395.4	135168	66417.4	84429.6	60443.6	63033.6	63413.3	68403.7	70470.8	65202.3	93924.5	109026	118622	128154	113095	69599.9	69835.3	66644	61423.2
Fucosylated GM1 d40:1_29.08	Fucosylated GM1 d40:1	29.08	C83 H149 N3 O35	0.82	1748	1746.99	[M-H]-1	381750	200963	350958	211237	271040	381453	260469	191862	485008	272212	367818	172747	252371	290145	238881	245323	312169	214269	201608	369260	325902	390808	203434	174719	214289	164294	194629	327923	335303	148628	196967	183769	253091	245682	205286	346103	371707	311669	347906	331982	355018	196669
Fucosylated GM1 d42:1_31.01	Fucosylated GM1 d42:1	31.01	C85 H153 N3 O35	0.23	1776.03	1775.02	[M-H]-1	126203	115824	153791	144422	119517	127087	131035	111665	147196	139486	121375	116811	127771	158234	105698	123600	151550	119007	108114	154739	128994	135666	109675	112241	139327	161596	117541	136544	190451	109042	150068	119657	132678	139263	112961	142068	146887	135490	152013	156405	156705	131842
Fucosylated GM1 d42:3_10.95	Fucosylated GM1 d42:3	10.95	C85 H149 N3 O35	-7.3	1771.98	886.999	[M+2H]+2	371847	394940	441345	274401	397928	314298	702409	559646	370510	315161	419031	303201	297335	309615	259209	432549	253115	245422	374641	362556	422965	403761	402945	351645	305761	314043	419679	294269	282952	330871	289514	337577	338365	553666	370492	320543	512818	359306	391669	269687	317663	431091
Fucosylated GM1 d42:3_27.19	Fucosylated GM1 d42:3	27.19	C85 H149 N3 O35	3.83	1772	1773.01	[M+H]+1	846819	1.02886e+06	1.48015e+06	1.71013e+06	1.44787e+06	888549	934091	688114	2.04141e+06	2.14e+06	1.75645e+06	702001	811657	1.00302e+06	1.03126e+06	1.44681e+06	1.38151e+06	961876	821693	1.53679e+06	981494	748474	810980	955858	810917	1.46966e+06	781822	2.0887e+06	1.47725e+06	786123	1.68477e+06	734095	767190	1.62471e+06	868477	1.02408e+06	809005	1.07399e+06	801164	1.89239e+06	1.18718e+06	1.18739e+06
Fucosylated GM1 d42:4_4.88	Fucosylated GM1 d42:4	4.88	C85 H147 N3 O35	-9.71	1769.96	885.989	[M+2H]+2	233753	317683	320963	263826	301857	348364	233346	241663	464200	295518	331298	230162	262657	257795	248922	316308	252009	219389	57161	61912.5	51543.1	277602	100312	85668.8	89918.2	214217	226901	379958	346247	242434	297713	238195	314124	59091.4	65941.5	48027.8	52278.1	49203.9	237363	333730	267807	272483
Fucosylated GM1 d44:2_30.83	Fucosylated GM1 d44:2	30.83	C87 H155 N3 O35	-1.81	1802.04	1801.03	[M-H]-1	126430	137092	147702	153507	135597	153746	139666	110090	180986	165545	180251	107884	104687	129124	126560	159745	130464	110518	101650	190753	113026	124135	124223	111067	142264	150196	97439.4	179481	167211	108340	170371	108118	145086	147948	128858	107115	110353	123911	117564	209028	117502	159664
Fucosylated GM1 t30:3_29.66	Fucosylated GM1 t30:3	29.66	C73 H125 N3 O36	-9.84	1619.79	1620.8	[M+H]+1	383945	334748	556539	674954	4.95796e+06	1.00969e+06	444888	378521	742533	1.32212e+06	2.59516e+06	267056	331321	425596	579612	797239	503906	468564	318858	700183	313337	287153	276165	391493	505720	663611	357752	1.34313e+06	469223	326755	762449	352129	327354	706554	326854	337740	415283	366424	343731	1.00721e+06	333315	366595
Fucosylated GM1 t30:3_29.67	Fucosylated GM1 t30:3	29.67	C73 H125 N3 O36	1.49	1619.81	1620.81	[M+H]+1	312091	272101	452384	493391	971181	477463	361628	245133	507842	620332	1.95462e+06	191158	269315	256297	405474	557283	354902	380873	259184	569146	252042	233413	222887	318226	409252	360246	243789	916859	381409	210888	543023	248716	218668	512956	265684	260486	337564	297849	279402	818712	232734	243601
Fucosylated GM1 t32:1_13.33	Fucosylated GM1 t32:1	13.33	C75 H133 N3 O36	1.37	1651.87	835.455	[M+H+NH4]+2	401501	687560	613310	390976	781121	403924	808858	712006	676357	689313	1.04665e+06	437062	375789	507481	594530	431278	458489	2.79783e+06	2.01971e+07	8.40881e+06	9.4637e+06	625472	1.36394e+07	1.76693e+07	8.37006e+06	1.16336e+06	490529	416769	526098	568235	515020	592116	398453	3.24287e+07	1.75222e+07	1.56074e+07	2.34828e+07	1.39727e+07	645004	343489	536155	513673
Fucosylated GM1 t32:1_33.46	Fucosylated GM1 t32:1	33.46	C75 H133 N3 O36	3.32	1651.87	1652.88	[M+H]+1	609558	848513	1.34855e+06	1.41193e+06	839161	808655	1.10988e+06	706373	1.17625e+06	905405	829670	670692	1.035e+06	651041	590728	912836	817437	1.06264e+06	568175	1.08712e+06	646474	973828	598638	920083	881035	956378	651803	1.56331e+06	1.05801e+06	715773	736950	722506	769431	657160	614737	825573	1.03354e+06	1.09226e+06	825640	1.54944e+06	876750	659947
Fucosylated GM1 t32:2_33.48	Fucosylated GM1 t32:2	33.48	C75 H131 N3 O36	7.71	1649.86	1650.87	[M+H]+1	969617	1.25685e+06	1.99752e+06	2.0914e+06	1.24912e+06	1.59627e+06	1.644e+06	1.25799e+06	1.74231e+06	1.34112e+06	1.29729e+06	993450	1.53308e+06	964343	875006	1.35212e+06	1.21081e+06	1.57401e+06	1.17644e+06	1.64169e+06	1.13466e+06	1.44247e+06	937912	1.36286e+06	1.30502e+06	1.43929e+06	965472	2.31562e+06	1.76274e+06	1.19942e+06	1.10327e+06	1.0702e+06	1.18913e+06	1.1095e+06	1.17557e+06	1.22287e+06	2.1573e+06	1.70247e+06	1.22297e+06	2.29508e+06	1.29867e+06	1.00153e+06
Fucosylated GM1 t33:0_15.71	Fucosylated GM1 t33:0	15.71	C76 H137 N3 O36	-9.74	1667.88	834.948	[M+2H]+2	266328	221541	312297	281895	389239	263140	221288	275574	257758	216362	400766	284110	304358	269237	376691	350453	188942	200513	247101	425422	309805	296591	278732	323999	335478	319261	284842	310618	310184	355298	256501	225463	236119	326341	266569	308628	337723	355542	281777	240656	308548	259714
Fucosylated GM1 t34:0_5.01	Fucosylated GM1 t34:0	5.01	C77 H139 N3 O36	-2.2	1681.91	841.962	[M+2H]+2	106275	161940	144604	122118	131622	166603	118058	123558	196651	154190	141701	106091	119770	130609	117200	141136	137991	114851	37074.8	56506	31238.7	142661	40154.7	33584.3	45327.2	109210	136843	134254	158821	109700	140964	118465	147820	35791.1	35751.8	33319.5	34371.2	26222.9	104381	165035	122652	164009
Fucosylated GM1 t38:0_26.11	Fucosylated GM1 t38:0	26.11	C81 H147 N3 O36	0.03	1737.98	1736.97	[M-H]-1	763434	658966	1.19784e+06	2.65287e+06	1.16071e+06	1.12443e+06	587282	703636	2.07682e+06	1.92357e+06	1.75322e+06	898413	709747	1.51542e+06	1.10749e+06	1.03494e+06	1.71512e+06	919739	990870	1.70088e+06	925246	785824	1.45465e+06	528441	1.13703e+06	825566	726771	1.65381e+06	720343	768619	1.2572e+06	844901	1.10097e+06	527334	735356	882015	1.09848e+06	1.555e+06	1.10383e+06	2.0686e+06	931582	795312
Fucosylated GM1 t39:4_26.28	Fucosylated GM1 t39:4	26.28	C82 H141 N3 O36	-8.74	1743.91	1744.92	[M+H]+1	337975	306813	627654	714307	573019	379232	422212	327532	650524	963759	590534	304142	323833	320933	490834	441268	437616	487530	444979	436022	273005	342270	379681	344670	497557	471048	235299	908575	311902	292880	599284	310735	440187	397458	293640	357431	336382	362466	310718	871731	419624	337534
Fucosylated GM1 t40:0_28.22	Fucosylated GM1 t40:0	28.22	C83 H151 N3 O36	0.85	1766.01	1765	[M-H]-1	397191	298783	614378	973383	403303	528666	344882	286456	984967	760176	670527	335360	326662	603406	464154	489448	767034	368771	437182	828365	377597	490116	522248	267150	579221	391752	325324	611616	434335	392448	512171	325119	471391	319966	316773	373232	538381	906686	659510	950406	545736	345536
Fucosylated GM1 t40:1_29.08	Fucosylated GM1 t40:1	29.08	C83 H149 N3 O36	-0.45	1763.99	1762.98	[M-H]-1	188610	118515	202291	132928	148387	206085	136487	91553.7	265856	152671	254878	119704	174880	201054	137127	149917	216316	148477	123266	225147	178219	234834	110746	121071	148490	97768.8	102503	192344	202789	86035.1	136488	127342	117408	136587	113297	239830	192801	173389	187389	202301	192948	136281
Fucosylated GM1 t42:1_30.97	Fucosylated GM1 t42:1	30.97	C85 H153 N3 O36	0.48	1792.02	1791.02	[M-H]-1	154467	158312	188233	198384	143753	155549	171733	136673	184425	170724	148558	144587	156386	193671	124908	151281	185490	145659	132326	189393	157883	166325	134237	137378	170530	197786	143865	155519	233103	133462	183677	146455	162392	170452	138259	173885	179783	165833	186057	191433	191800	161369
Fucosylated GM1 t44:4_28.05	Fucosylated GM1 t44:4	28.05	C87 H151 N3 O36	-0.8	1814.01	1815.01	[M+H]+1	379930	438080	738453	722666	696100	502042	398794	448432	781955	844247	663932	340067	545163	392153	450263	629658	546405	539986	321764	585441	437728	501951	372032	418541	506311	782945	373344	1.04096e+06	385082	370939	759375	428871	282943	327665	314356	321046	532957	460889	297255	706717	320832	521310
Fucosylated GM1 t44:4_10.86	Fucosylated GM1 t44:4	10.86	C87 H151 N3 O36	0.65	1814.01	908.012	[M+2H]+2	391417	497681	464573	601687	554307	344596	906695	589100	396644	387773	441084	379563	679675	355675	409627	455314	292673	752232	531582	594706	508397	558180	639180	478038	558373	429161	552410	349233	332575	384335	547963	1.77127e+06	402274	635797	633616	473924	577709	509908	429314	410566	468927	486224
Fucosylated GM1 t48:3_8.16	Fucosylated GM1 t48:3	8.16	C91 H161 N3 O36	-8.67	1872.07	937.042	[M+2H]+2	68490.3	72889.9	68876.8	61015.2	99976	214200	129235	75654.8	76427.8	75183.6	72839.9	66886.3	75326.4	67626.3	64030.9	73829.2	62172.4	63484.8	99194.7	78392.7	82323.9	72424.7	94716.6	78589.2	90392.1	68773.3	74533.7	74175.4	80518	64126.3	80080.3	74054.7	77708	94329.4	93762.8	94094.9	99594.6	81115.4	67448.5	66150.8	69713.7	77929.4
GA2 d29:2_3.4	GA2 d29:2	3.4	C49 H88 N2 O18	8.1	992.611	993.619	[M+H]+1	538191	536887	383164	730998	487744	598208	778530	568928	1.12096e+06	745413	413850	672789	672463	645745	259355	447952	476384	281220	32819.7	36863.4	40164.1	857584	42853.8	38016.3	43059	271453	364146	377029	558456	400214	376864	624831	765095	36983.3	35661.8	30732.8	47783.7	34408.2	357040	552116	484808	623580
GA2 d29:3_31.76	GA2 d29:3	31.76	C49 H86 N2 O18	-4.08	990.584	989.576	[M-H]-1	551003	534562	855066	490796	1.46575e+06	1.32691e+06	478703	672384	762770	771072	2.43652e+06	457408	561028	634520	960041	1.65681e+06	666286	1.12187e+06	505088	1.14128e+06	1.1117e+06	506035	911633	1.46302e+06	709553	637339	493522	1.98077e+06	1.17866e+06	1.57448e+06	1.45809e+06	620266	561225	891645	1.41236e+06	811010	547180	577530	585597	1.49167e+06	561986	545764
GA2 d30:2_3.19	GA2 d30:2	3.19	C50 H90 N2 O18	6.63	1006.63	1007.63	[M+H]+1	873309	1.16814e+06	608729	1.406e+06	740879	1.05846e+06	1.22407e+06	939258	1.50117e+06	1.20544e+06	645376	1.22283e+06	990327	1.05898e+06	427941	633214	788222	442078	56610.6	77006.2	66729	1.04704e+06	79364.2	71631.8	60845.2	491377	685576	549482	992924	871290	603288	1.1475e+06	1.75294e+06	60479.9	59833.8	44384.2	82380	61577.7	704617	926583	1.03638e+06	1.19147e+06
GA2 d31:0_34.77	GA2 d31:0	34.77	C51 H96 N2 O18	5.87	1024.67	1023.66	[M-H]-1	48589.6	62285.8	90260.6	80945.8	34627.7	39221.8	63747.1	59721.6	71483.2	91918.4	44537.1	69732.1	74038.5	72128	62727.1	55265.6	71710.2	90001.7	100324	52275.2	55954.8	69802.4	68982.7	69696	82368.8	126297	57881.6	77706.3	93142.9	59043.7	82146.8	83472	85378.2	51200	54848.9	93470.1	67785.1	63926.1	76809.5	59547	71468.3	73177
GA2 d31:3_6.65	GA2 d31:3	6.65	C51 H90 N2 O18	-9.83	1018.61	510.312	[M+2H]+2	126365	134714	136977	120100	276867	195927	148721	129707	187022	255502	239497	121126	123271	120878	163126	171621	123444	117508	3.32529e+06	2.23942e+06	1.44456e+06	190069	3.1117e+06	5.80069e+06	3.85598e+06	123248	120745	210190	140943	123568	135084	124208	128528	4.91866e+06	5.73294e+06	2.96779e+06	6.31345e+06	4.34667e+06	117528	155491	137818	139024
GA2 d31:3_31.77	GA2 d31:3	31.77	C51 H90 N2 O18	-8.47	1018.61	1017.6	[M-H]-1	487465	865249	531648	358073	579022	612539	456063	442759	570077	889770	1.31175e+06	367546	683384	505382	391369	931105	904028	693917	469442	1.05472e+06	510828	510271	475879	507236	996012	270023	470182	1.11133e+06	380711	621500	519663	505302	382118	722115	743163	429344	698187	683931	508611	1.46745e+06	508818	481462
GA2 d32:1_5.2	GA2 d32:1	5.2	C52 H96 N2 O18	4.34	1036.67	1035.66	[M-H]-1	192571	328014	224598	139269	766822	272706	229398	336567	753057	433467	497594	184663	128741	168845	590401	546933	232778	742069	295934	406314	112740	175081	226669	98442	456227	655576	309861	651256	356849	188689	471512	249852	777068	377103	451638	134241	367070	148275	185118	446614	175091	368574
GA2 d34:1_31.3	GA2 d34:1	31.3	C54 H100 N2 O18	-2.88	1064.69	1063.69	[M-H]-1	395264	477273	353486	452845	724711	534891	351418	459791	651894	673016	651135	438893	317717	541083	306449	555920	436470	303193	262158	732281	463947	352355	335510	359307	633349	535149	556186	554684	866163	304786	745084	321320	494608	696189	449400	371504	309211	460730	672129	751483	696206	459987
GA2 d35:1_32.31	GA2 d35:1	32.31	C55 H102 N2 O18	-5.25	1078.71	1077.7	[M-H]-1	164842	148224	176223	145838	103134	134199	170484	185274	197024	135695	145170	118727	187207	240039	133607	125455	201923	154902	180923	269446	190042	190999	157896	143191	178019	155842	147421	193116	191283	174739	155645	183608	225349	158121	186384	184731	213118	207979	189879	168788	227300	157453
GA2 d35:3_33.42	GA2 d35:3	33.42	C55 H98 N2 O18	1.91	1074.68	1075.69	[M+H]+1	1.09596e+06	1.27137e+06	2.4237e+06	2.5386e+06	1.50877e+06	1.45393e+06	1.99552e+06	1.27003e+06	2.11485e+06	1.62788e+06	1.49171e+06	1.20587e+06	1.86089e+06	1.17054e+06	1.0621e+06	1.64124e+06	1.2901e+06	1.91057e+06	1.02155e+06	1.84066e+06	1.16233e+06	1.7509e+06	1.07632e+06	1.65427e+06	1.58406e+06	1.71952e+06	1.17191e+06	2.81075e+06	1.90225e+06	1.28693e+06	1.325e+06	1.29903e+06	1.3834e+06	1.18154e+06	1.10527e+06	1.48434e+06	1.85826e+06	1.96384e+06	1.48446e+06	2.78582e+06	1.57636e+06	1.18656e+06
GA2 d37:1_34.01	GA2 d37:1	34.01	C57 H106 N2 O18	-5.93	1106.74	1105.73	[M-H]-1	391360	233277	286127	194552	155464	189309	257700	280015	371877	209599	255780	233940	334547	348324	240046	250524	356522	261644	279881	379167	240470	323640	242055	245472	294360	282579	246620	338460	461182	362761	355400	249661	337354	172514	346766	333372	371028	383551	326677	250558	320163	277384
GA2 d39:1_30.97	GA2 d39:1	30.97	C59 H110 N2 O18	8.29	1134.78	1135.79	[M+H]+1	813909	1.33874e+06	2.20032e+06	1.69551e+06	7.48974e+06	2.05882e+06	2.2526e+06	2.49444e+06	2.6484e+06	5.83182e+06	5.45433e+06	760212	780422	1.78882e+06	905440	3.24969e+06	1.41804e+06	1.16471e+06	2.02712e+06	2.60339e+06	682261	932753	917342	1.3205e+06	2.10829e+06	6.79599e+06	989525	5.2037e+06	2.78409e+06	2.28476e+06	4.03917e+06	996963	690462	4.06454e+06	831479	1.81336e+06	1.14353e+06	1.35437e+06	1.58837e+06	2.5799e+06	1.47826e+06	1.01841e+06
GA2 d39:3_4.65	GA2 d39:3	4.65	C59 H106 N2 O18	7.45	1130.75	1131.76	[M+H]+1	204946	604209	548583	215692	558065	171704	288657	434433	387438	206659	363056	188823	353491	176524	345482	181403	279802	156653	30545.3	32437.1	35662.9	204428	35228.7	71042.9	38268.2	195385	149684	162584	630004	419170	597209	171496	188148	33111	26613.8	28028.8	30310.1	25254.4	168253	203729	499954	332735
GA2 d40:3_29.82	GA2 d40:3	29.82	C60 H108 N2 O18	-1.09	1144.76	1145.77	[M+H]+1	386934	338514	477589	511489	619878	462532	333995	331523	410587	517452	688994	391116	389209	310247	301104	498274	363479	445002	360637	501665	338675	353494	308617	406005	527547	408325	283755	990391	361811	337284	437497	362339	348247	506841	362027	403901	476520	453581	327898	562673	370860	375814
GA2 d44:1_2.98	GA2 d44:1	2.98	C64 H120 N2 O18	-1.42	1204.85	603.433	[M+2H]+2	2.07305e+07	2.64678e+07	3.1251e+07	1.86402e+07	3.41239e+07	2.60144e+07	1.90436e+07	3.06003e+07	3.19648e+07	2.45253e+07	3.53084e+07	3.27276e+07	2.66876e+07	2.5516e+07	2.12422e+07	2.66758e+07	2.17185e+07	2.44011e+07	131744	186777	182189	4.16753e+07	182506	159779	144848	2.05153e+07	2.06871e+07	2.11513e+07	2.7809e+07	2.71152e+07	3.4817e+07	2.23318e+07	2.65275e+07	144253	143454	105742	163050	121425	2.88466e+07	3.79505e+07	3.73097e+07	3.42461e+07
GA2 d45:1_3.55	GA2 d45:1	3.55	C65 H122 N2 O18	-2.22	1218.87	610.441	[M+2H]+2	7.05524e+07	9.28293e+07	8.24376e+07	7.24116e+07	9.81307e+07	6.97646e+07	6.68863e+07	8.75876e+07	1.48169e+08	8.44728e+07	1.22168e+08	8.84827e+07	1.03438e+08	1.08307e+08	7.20181e+07	6.67679e+07	7.82402e+07	8.08389e+07	84797.9	118006	111039	1.20849e+08	106580	107310	109914	8.87171e+07	7.10934e+07	1.01283e+08	1.20963e+08	9.99355e+07	1.281e+08	7.93684e+07	8.59067e+07	85579	83012.7	78358.6	91442.2	84491.6	8.08305e+07	9.35082e+07	1.35518e+08	9.57416e+07
GA2 d46:3_3.62	GA2 d46:3	3.62	C66 H120 N2 O18	4.79	1228.86	615.437	[M+2H]+2	591301	643878	452950	639249	560479	458727	557322	506415	1.27733e+06	673086	415815	421545	692630	545133	283508	466566	896315	268480	29413.9	31090.8	30180.5	591293	28866.9	33665.4	30001.1	412951	385535	383346	517575	1.00212e+06	829779	672576	618837	26380.9	21664.6	21732.2	23945.6	24382.2	339989	445657	1.57619e+06	541960
GA2 d47:1_5.06	GA2 d47:1	5.06	C67 H126 N2 O18	-1.62	1246.9	624.457	[M+2H]+2	8.70541e+07	9.8455e+07	1.29827e+08	9.79331e+07	1.06767e+08	1.29961e+08	8.83937e+07	1.0188e+08	1.18085e+08	6.54752e+07	1.19261e+08	9.15909e+07	8.17169e+07	1.03686e+08	8.50922e+07	1.13951e+08	8.84176e+07	8.03866e+07	320193	608123	302238	1.1236e+08	354859	328557	333624	8.44704e+07	9.45231e+07	1.02943e+08	1.3814e+08	1.11885e+08	1.37849e+08	5.77044e+07	1.13165e+08	264607	254491	264868	273915	256983	9.5214e+07	1.06615e+08	1.16125e+08	1.33958e+08
GA2 d47:2_11.74	GA2 d47:2	11.74	C67 H124 N2 O18	6.82	1244.89	623.454	[M+2H]+2	50188.5	71128.3	55878.2	31230.9	68548.7	61699.8	57867.2	52794.5	55034.7	59425.4	65913.3	49524.7	50740.1	57432.2	45601	52421.4	46877.3	47956.8	41111.1	32291.1	42305.2	60493.1	39956.8	34745.4	45284	44613.7	61150.7	51475.4	52085	61771.9	57747.7	49383.8	53216.2	38974	38726.4	38373.3	42339.1	32613.2	49798.2	54439.9	53342	58304.3
GA2 t30:0_30.7	GA2 t30:0	30.7	C50 H94 N2 O19	-9.02	1026.64	1025.63	[M-H]-1	209982	206850	224691	226032	323305	242982	188775	175076	258365	570855	306542	166351	162314	184330	180670	232593	207752	167743	157244	307776	178662	179596	177333	174688	236063	214412	158069	263800	266071	166203	262717	154520	206449	227291	196517	170097	157534	215091	172162	315098	174253	227927
GA2 t31:3_29.76	GA2 t31:3	29.76	C51 H90 N2 O19	-0.06	1034.61	1033.61	[M-H]-1	412882	233525	346504	367156	480525	450252	299221	279040	675124	904812	635573	192478	230669	487042	436076	395688	440200	485536	201479	817194	341912	249330	301449	376820	558523	346869	261489	983375	387513	242960	348421	255528	248593	642322	279780	238776	285239	420427	430809	597027	299440	269900
GA2 t32:2_32.55	GA2 t32:2	32.55	C52 H94 N2 O19	0.79	1050.65	1049.64	[M-H]-1	318208	344321	447115	334596	902795	908910	333265	323603	803638	1.63339e+06	1.48862e+06	413120	673841	315367	285015	1.80206e+06	266197	371388	318441	1.16514e+06	256094	264714	259849	424984	660857	328993	279687	1.96217e+06	1.11624e+06	236720	1.08734e+06	314754	363269	392656	298118	339662	410595	571679	800940	828323	270747	707332
GA2 t32:3_30.75	GA2 t32:3	30.75	C52 H92 N2 O19	0.55	1048.63	1047.62	[M-H]-1	178563	175900	191070	362726	312445	198522	201752	148880	219706	450736	829340	141460	138027	171766	226801	540616	432970	142644	133716	261724	151929	152723	150799	167547	200741	355095	134417	1.06094e+06	444497	141334	673539	131399	176126	214662	187608	144646	133962	182907	146401	476583	166805	193823
GA2 t33:2_17.94	GA2 t33:2	17.94	C53 H96 N2 O19	-1.22	1064.66	1063.65	[M-H]-1	848614	1.49829e+06	1.49869e+06	1.10724e+06	1.36605e+06	1.10473e+06	1.35262e+06	1.24837e+06	886911	1.19901e+06	1.36571e+06	677288	1.16783e+06	1.28599e+06	1.02386e+06	1.24953e+06	1.04513e+06	1.07377e+06	1.40239e+06	1.19379e+06	1.47307e+06	1.16274e+06	1.55202e+06	1.36532e+06	1.00119e+06	1.21158e+06	1.35742e+06	777109	1.48904e+06	1.26677e+06	1.4653e+06	1.18564e+06	907505	1.40873e+06	1.50149e+06	1.51089e+06	963125	1.48264e+06	1.49188e+06	705438	730728	938288
GA2 t33:2_6.55	GA2 t33:2	6.55	C53 H96 N2 O19	5.4	1064.67	533.341	[M+2H]+2	39135.3	41693.6	46207.9	39768.4	103350	63648.7	46028.6	43353.4	63513	92228.4	88358.2	38421.1	41202.3	44252.7	52486.2	63108	40157.9	42462.6	37918.1	54627.6	43201.1	49650.7	38484	212783	39026.8	38144.8	40765.3	72292.5	48085.3	45413.9	51152.8	43185.6	39130.8	52150.8	39173.7	37498.8	37054.2	36667.9	38824.6	54110.2	42654.3	45109.6
GA2 t33:3_31.36	GA2 t33:3	31.36	C53 H94 N2 O19	-0.34	1062.64	1061.64	[M-H]-1	784862	887653	934872	1.2158e+06	2.7131e+06	2.56465e+06	990806	1.03997e+06	1.388e+06	1.79668e+06	914560	1.15365e+06	951438	1.40366e+06	1.34284e+06	2.19241e+06	1.0696e+06	742724	711242	1.4949e+06	973785	781629	1.02935e+06	850952	1.57096e+06	1.56137e+06	1.16884e+06	3.04537e+06	2.04977e+06	786692	2.92492e+06	885693	1.11896e+06	1.37381e+06	1.00607e+06	818347	853813	1.45007e+06	1.32407e+06	1.70487e+06	1.16011e+06	1.04137e+06
GA2 t33:3_31.76	GA2 t33:3	31.76	C53 H94 N2 O19	0.77	1062.65	1061.64	[M-H]-1	478993	492891	547798	437477	778097	477814	452538	399446	397869	875710	1.0829e+06	343879	500079	472840	468020	664839	484185	582557	439214	986805	991441	811043	396287	659734	441799	303695	943191	576743	356196	532169	971022	514443	357513	580038	558646	447947	1.12271e+06	497604	521979	538970	565080	450461
GA2 t34:2_34.34	GA2 t34:2	34.34	C54 H98 N2 O19	0.87	1078.68	1077.67	[M-H]-1	366695	411626	383611	362334	138922	256188	322553	291224	329930	321717	176401	279488	460263	330934	276326	278940	326745	289171	384844	340431	318465	285585	316876	280814	346412	263982	261917	417774	534925	289465	337066	300717	407403	286804	295618	313913	253182	323404	446468	370376	383824	410235
GA2 t34:3_32.47	GA2 t34:3	32.47	C54 H96 N2 O19	-0.58	1076.66	1075.65	[M-H]-1	80447.7	90561.3	99946.5	76555.3	67212.5	88165.1	80801.9	73368.8	102630	101424	124393	60814.9	91036.6	86219.1	83456.3	101375	80815.7	77821.5	96350.9	126024	83919.3	80847.5	68026.4	91545.6	93619.6	73376.8	74046.1	127853	150900	72498	120024	86396.1	94140.5	72991.3	82995.5	79328.5	67292.1	89976.7	103469	132325	77207.9	90244.9
GA2 t41:2_30	GA2 t41:2	30	C61 H112 N2 O19	-7.82	1176.78	1177.78	[M+H]+1	450844	372888	479381	587758	390622	357765	431402	376687	440357	371977	434535	516563	535599	407677	392305	449899	361386	424786	496529	460742	538979	517546	499793	586065	645723	474671	1.53253e+06	477904	1.02725e+06	438606	573451	455621	462819	558115	511532	593476	635154	549483	432821	488449	488231	439790
GA2 t42:0_25.66	GA2 t42:0	25.66	C62 H118 N2 O19	0.25	1194.83	1195.84	[M+H]+1	3.82441e+06	2.65308e+06	2.24385e+06	2.26671e+06	4.10028e+06	2.93843e+06	2.77982e+06	3.95063e+06	5.52601e+06	3.24006e+06	3.10297e+06	1.28214e+06	2.00886e+06	3.86168e+06	6.10601e+06	3.66771e+06	2.31365e+06	2.34136e+06	3.8629e+06	2.59668e+06	2.45659e+06	5.25717e+06	1.47378e+06	6.13307e+06	2.65025e+06	3.20139e+06	4.74556e+06	3.86804e+06	2.10575e+06	5.42274e+06	1.94375e+06	2.19177e+06	1.6608e+06	2.43275e+06	2.02901e+06	2.47502e+06	1.72823e+06	1.76565e+06	2.0192e+06	3.80675e+06	1.574e+06	3.09888e+06
Gb3 d30:0_34.57	Gb3 d30:0	34.57	C48 H91 N O18	8.37	969.632	968.624	[M-H]-1	144707	137655	144584	117542	50877.6	84179.7	128184	110391	109465	126992	62684.4	106676	141794	112958	101903	153965	117701	118787	117497	155403	110858	93317.7	103966	132612	157287	103528	87113.9	145784	177344	145737	120407	106631	180434	91772.4	110460	101798	97401.5	120443	133526	150060	91901	126682
Gb3 d30:2_32.56	Gb3 d30:2	32.56	C48 H87 N O18	3.81	965.596	966.603	[M+H]+1	1.32586e+06	1.14295e+06	2.09274e+06	923258	2.25826e+06	1.9293e+06	862840	1.05853e+06	2.28884e+06	1.93751e+06	2.70179e+06	270415	1.01211e+06	670409	979009	3.2225e+06	828842	1.38816e+06	1.01559e+06	2.6586e+06	899064	695775	660468	1.38772e+06	1.87382e+06	694562	1.08788e+06	2.97402e+06	2.45817e+06	588538	1.87902e+06	596663	1.15592e+06	768607	1.27287e+06	1.08207e+06	791148	1.61712e+06	1.36512e+06	2.86674e+06	839309	769639
Gb3 d30:3_29.51	Gb3 d30:3	29.51	C48 H85 N O18	-3.89	963.573	962.566	[M-H]-1	1.12072e+06	1.91312e+06	2.94341e+06	2.78202e+06	1.46428e+06	1.40785e+06	1.9221e+06	545248	2.65409e+06	2.78675e+06	1.21378e+06	1.06955e+06	520979	969707	2.84055e+06	1.58702e+06	2.13019e+06	2.63087e+06	869948	1.26644e+06	622231	459909	754711	1.53584e+06	2.21417e+06	3.19053e+06	588419	5.2376e+06	1.69394e+06	1.95695e+06	1.12334e+06	1.53374e+06	798080	1.26702e+06	1.18528e+06	575314	1.14851e+06	956070	983100	5.21738e+06	874061	909817
Gb3 d30:3_33.94	Gb3 d30:3	33.94	C48 H85 N O18	7.93	963.584	962.577	[M-H]-1	298210	177753	223768	155112	126335	150314	196364	384292	283365	160508	217828	181797	300227	298196	186581	209598	271665	207014	213265	502976	195287	246609	190404	202034	255836	253432	226668	293654	780967	283078	270810	206413	257059	234679	293207	254024	337851	306214	263815	190921	243960	219400
Gb3 d30:4_27.89	Gb3 d30:4	27.89	C48 H83 N O18	-4.49	961.557	960.549	[M-H]-1	4.47937e+06	7.30998e+06	8.32054e+06	6.98443e+06	1.06527e+07	7.8568e+06	6.03314e+06	4.80453e+06	6.87332e+06	1.21332e+07	6.13434e+06	3.77695e+06	6.46742e+06	6.02102e+06	8.84481e+06	7.74059e+06	8.85652e+06	6.54203e+06	4.40893e+06	7.86963e+06	4.67358e+06	3.54499e+06	5.83682e+06	8.08109e+06	4.73461e+06	1.02479e+07	7.50953e+06	1.3161e+07	6.23505e+06	6.79847e+06	5.32235e+06	6.20035e+06	4.12021e+06	4.61714e+06	7.82257e+06	5.32529e+06	3.87364e+06	5.63476e+06	5.24746e+06	6.70386e+06	5.0359e+06	9.52716e+06
Gb3 d30:4_29.53	Gb3 d30:4	29.53	C48 H83 N O18	2.77	961.564	960.556	[M-H]-1	1.12072e+06	1.91312e+06	2.20915e+06	2.78202e+06	1.41674e+06	1.40785e+06	1.63652e+06	717981	2.18791e+06	2.78675e+06	1.59831e+06	1.06955e+06	686023	1.27691e+06	2.57361e+06	1.58702e+06	2.13019e+06	2.63087e+06	869948	1.66764e+06	819352	605607	993802	1.53584e+06	2.91561e+06	2.67268e+06	774828	4.13709e+06	2.23058e+06	1.95695e+06	1.25586e+06	1.53374e+06	1.05091e+06	1.35619e+06	1.56077e+06	757572	1.14851e+06	1.25895e+06	1.29454e+06	5.33228e+06	1.15096e+06	909817
Gb3 d30:6_28.77	Gb3 d30:6	28.77	C48 H79 N O18	7.16	957.537	956.529	[M-H]-1	157526	116402	161831	183073	161074	210242	121918	117078	240530	194251	339018	132640	142103	192039	126476	199515	194647	132036	143695	278389	166410	177960	177548	106646	158979	124794	129124	234250	184603	118974	167899	132299	153546	136212	115271	212470	197813	238149	201852	206314	192366	176529
Gb3 d31:0_24.3	Gb3 d31:0	24.3	C49 H93 N O18	-7.96	983.631	982.624	[M-H]-1	5.48601e+06	9.40443e+06	1.61244e+07	1.71491e+07	2.07056e+06	3.79156e+06	1.1166e+07	8.26531e+06	7.54805e+06	1.05917e+07	3.20656e+06	2.39026e+06	1.30715e+07	6.08969e+06	5.33851e+06	5.95529e+06	9.66301e+06	1.10225e+07	4.47954e+06	1.08073e+07	3.36897e+06	1.52542e+07	4.03888e+06	7.50189e+06	1.05118e+07	1.81059e+07	7.00844e+06	7.59983e+06	1.68371e+07	4.53463e+06	1.32235e+07	4.58587e+06	1.02603e+07	4.22319e+06	6.61477e+06	7.28414e+06	9.42786e+06	5.18647e+06	5.62203e+06	1.8972e+07	1.03721e+07	1.46577e+07
Gb3 d31:2_17.95	Gb3 d31:2	17.95	C49 H89 N O18	-5.72	979.602	978.595	[M-H]-1	412315	708637	864320	1.26372e+06	1.00794e+06	500256	903388	515240	1.16817e+06	804078	1.13355e+06	828892	896374	810808	586940	807657	567238	410707	813587	1.36642e+06	957935	746589	739717	904770	1.32382e+06	710541	769532	753201	977573	1.08331e+06	964536	848288	804255	831208	1.34974e+06	929628	742692	1.45415e+06	665326	991603	1.52797e+06	1.00451e+06
Gb3 d31:4_28.87	Gb3 d31:4	28.87	C49 H85 N O18	-6.25	975.571	974.563	[M-H]-1	159166	100828	169648	166768	152936	185049	150889	103689	241021	178819	204961	116120	117855	193801	109438	150380	188083	107150	139480	260213	251830	193733	127918	99133.1	123304	104662	109649	163513	189860	87429.8	123104	113603	124747	129394	109534	217138	213269	210056	202064	174173	182611	125382
Gb3 d32:2_32.56	Gb3 d32:2	32.56	C50 H91 N O18	7.95	993.632	992.624	[M-H]-1	408388	247738	623774	298951	697099	624026	175395	232831	547977	1.17518e+06	918957	159716	557503	202097	440054	839800	191528	675337	229118	822227	197622	225714	189259	559649	838818	200178	201234	1.68951e+06	512443	170319	259023	234748	261371	377133	221178	209272	351283	365589	234818	966867	383490	543462
Gb3 d32:3_34.58	Gb3 d32:3	34.58	C50 H89 N O18	2.42	991.61	990.603	[M-H]-1	113503	97341.7	97862.1	78660.2	31196.4	64069.8	82070.1	92237.5	85407.1	106109	41826.1	63800.6	91347.7	68889.3	62254.2	107991	79666.9	99253	92763.9	110843	84401.8	71720.6	73148.5	110805	114543	86503.4	64550.6	104766	116330	121772	90025.7	73004	131201	67144.5	70836.7	68964.5	64122.1	86558.5	98513.6	116670	71041.9	102010
Gb3 d32:4_29.9	Gb3 d32:4	29.9	C50 H87 N O18	-6.68	989.586	988.578	[M-H]-1	171808	148090	329606	190506	245925	263327	158901	176818	272773	464226	341018	170643	161044	242519	158545	218470	259156	376296	170659	367547	192842	170171	212062	266228	249543	151123	195243	728671	228853	162437	220845	191865	203553	256510	160678	166420	195480	224855	240739	266444	200588	190050
Gb3 d32:5_29.09	Gb3 d32:5	29.09	C50 H85 N O18	-4.69	987.572	986.565	[M-H]-1	157861	131386	164300	155045	164502	228467	151310	101497	294729	169251	193349	103832	140354	168933	118509	166198	215506	123877	136653	249599	197574	224114	122774	106248	121248	108387	113635	213233	224813	95378.8	131130	115835	130159	151421	125601	229157	213740	192219	207740	168100	171471	129297
Gb3 d33:3_31.77	Gb3 d33:3	31.77	C51 H91 N O18	7.7	1005.63	1004.62	[M-H]-1	564746	444294	702221	435235	1.19402e+06	475366	467397	437491	395830	661882	1.47087e+06	342117	497516	470417	369432	839969	481704	479048	436963	1.01447e+06	454544	387444	402202	535651	453367	251342	437652	1.83118e+06	648326	529442	426715	514478	355681	628410	505095	445651	449216	557964	473423	1.24837e+06	473615	518868
Gb3 d34:2_22.28	Gb3 d34:2	22.28	C52 H95 N O18	0.14	1021.66	1022.66	[M+H]+1	176992	155617	199815	110368	1.24179e+06	287636	191606	106690	290784	1.00118e+06	1.09105e+06	98190.5	138692	96333.3	250110	396105	292705	174645	296689	482983	257070	92472.3	102342	118619	244942	223487	147877	941627	425940	78538.7	605917	82976.9	211534	692834	216003	112127	244312	303302	216104	223185	122349	116212
Gb3 d34:2_30.59	Gb3 d34:2	30.59	C52 H95 N O18	8.1	1021.66	1022.67	[M+H]+1	640150	870626	891023	1.0883e+06	863512	906707	863833	825715	1.03716e+06	935180	892526	953016	1.1817e+06	691874	827014	736035	800681	762458	755278	735165	839181	901501	985515	952719	1.10249e+06	1.07577e+06	867168	1.06814e+06	882279	1.0221e+06	855443	879365	996972	882930	803375	879198	1.00019e+06	1.30769e+06	1.01805e+06	841107	961313	791265
Gb3 d34:4_5.83	Gb3 d34:4	5.83	C52 H91 N O18	1.13	1017.62	1018.63	[M+H]+1	243582	349725	531428	385955	1.84803e+06	1.00354e+06	312055	251979	802790	1.78021e+06	1.6463e+06	246675	256464	290296	518601	937396	315833	297424	334723	1.85987e+06	409709	294594	346849	289175	449681	405158	426162	1.48334e+06	315753	243306	546649	245626	240820	466331	376513	457055	353238	364540	219980	610727	330066	256605
Gb3 d35:4_23.32	Gb3 d35:4	23.32	C53 H93 N O18	-1.83	1031.64	1032.64	[M+H]+1	342508	524222	1.08114e+06	904835	862632	531917	694904	506115	770619	1.12555e+06	919609	281142	943204	378275	422015	943299	599382	816436	627829	624293	440065	378173	314792	513131	733163	1.05008e+06	318879	1.42326e+06	854510	368602	807650	490949	374495	418225	444138	713823	525848	840784	376085	814160	575356	694393
Gb3 d37:2_33.42	Gb3 d37:2	33.42	C55 H101 N O18	8	1063.71	1064.72	[M+H]+1	1.11831e+06	1.29731e+06	2.47314e+06	2.59038e+06	1.53955e+06	1.48358e+06	2.03623e+06	1.29593e+06	2.15799e+06	1.66109e+06	1.52214e+06	1.23047e+06	1.89885e+06	1.19442e+06	1.08377e+06	1.67472e+06	1.31641e+06	1.94954e+06	1.04239e+06	1.8782e+06	1.18604e+06	1.78662e+06	1.09828e+06	1.68801e+06	1.61637e+06	1.7546e+06	1.19582e+06	2.86809e+06	1.94106e+06	1.31318e+06	1.35203e+06	1.32553e+06	1.41162e+06	1.20565e+06	1.12782e+06	1.51462e+06	1.89617e+06	2.0039e+06	1.51475e+06	2.84265e+06	1.60851e+06	1.21076e+06
Gb3 d37:3_4.03	Gb3 d37:3	4.03	C55 H99 N O18	-1.46	1061.68	531.85	[M+2H]+2	776806	850431	407278	458709	619758	467382	753515	432718	2.1528e+06	626623	450801	519294	860117	853599	510984	427159	467952	318973	45935.4	115907	62518.3	545340	43980.3	51678.7	51063.2	1.07809e+06	697791	780103	2.29815e+06	378236	488204	502540	497075	68485.8	56260.1	58920.1	44307.4	52344.4	1.01981e+06	549750	656451	919615
Gb3 d37:4_25.84	Gb3 d37:4	25.84	C55 H97 N O18	-0.1	1059.67	1060.68	[M+H]+1	1.49651e+06	1.21271e+06	1.50079e+06	1.15319e+06	2.10429e+06	1.63229e+06	1.35466e+06	838564	1.7584e+06	2.37493e+06	2.02971e+06	653361	858375	934727	977724	2.10154e+06	1.14909e+06	1.23251e+06	799741	1.76115e+06	1.13983e+06	768687	565554	1.14145e+06	995623	1.25539e+06	853898	3.22935e+06	983031	1.24023e+06	1.22728e+06	1.19113e+06	734069	877086	948855	865276	1.16297e+06	911828	634122	1.92725e+06	880242	786962
Gb3 d37:5_30.82	Gb3 d37:5	30.82	C55 H95 N O18	2.73	1057.66	1056.65	[M-H]-1	135882	126729	141291	146367	125347	142124	129108	103752	167304	157481	377799	99728.6	96773.1	125849	116993	147670	134530	110270	105024	251355	104482	114752	114832	229108	131510	138843	90073.7	353720	160801	100150	290164	99945.3	134118	136764	119117	99893.8	102011	140167	108677	193227	108619	147595
Gb3 d39:1_30.21	Gb3 d39:1	30.21	C57 H107 N O18	0.45	1093.75	1094.76	[M+H]+1	627158	535469	782634	733013	519752	525823	664252	592037	593515	532975	703994	615302	644967	646168	514110	548307	513060	581354	600261	619721	587468	650373	581532	640690	748756	596312	578164	605805	610746	571385	771730	670747	633065	649358	648719	595192	687559	737928	665033	610960	696299	556324
Gb3 d39:5_9.69	Gb3 d39:5	9.69	C57 H99 N O18	-1.35	1085.68	1086.69	[M+H]+1	206308	225476	432068	302049	1.07155e+06	716952	594319	247572	425855	1.05694e+06	845725	195416	261099	171480	420532	712540	234554	204746	250594	652654	202269	268603	711424	220187	369003	400108	151505	1.00637e+06	205498	235041	358626	166386	143844	413778	216607	243238	249942	342258	174641	435505	222320	203974
Gb3 d40:3_30.02	Gb3 d40:3	30.02	C58 H105 N O18	-1.67	1103.73	1104.74	[M+H]+1	239063	188098	258139	344474	196800	229871	243883	228535	204267	239002	229017	255905	266691	218404	195415	245469	209925	223057	197105	255796	209942	249320	219041	280747	307131	203358	243353	247452	211858	269208	271097	264834	232153	290096	234409	314234	287272	331823	182229	208045	238474	181550
Gb3 d40:5_29.16	Gb3 d40:5	29.16	C58 H101 N O18	-5.78	1099.7	1098.69	[M-H]-1	102128	84362.1	123810	119110	103471	111833	113378	80285.4	148722	130728	125763	107880	106778	116023	81343.7	100635	126126	89914	79353.5	133171	87067.3	362870	104576	75390.9	106304	120597	74688.1	158173	110359	91519.8	128128	79582.7	91710.4	78476	85773.6	114932	109173	115618	118618	156966	130301	127145
Gb3 d42:1_30.97	Gb3 d42:1	30.97	C60 H113 N O18	-5.54	1135.79	1136.8	[M+H]+1	677176	1.59568e+06	2.61585e+06	2.14588e+06	2.11862e+06	674616	1.96621e+06	757662	1.81453e+06	1.30883e+06	1.37519e+06	1.08659e+06	927804	971018	865058	810358	1.68583e+06	1.38466e+06	1.18768e+06	1.23898e+06	627620	1.25005e+06	1.16326e+06	593165	1.06619e+06	2.17734e+06	632850	2.1202e+06	2.45187e+06	1.13577e+06	1.50014e+06	807052	820855	1.15104e+06	876453	1.23672e+06	1.28765e+06	1.41635e+06	1.49543e+06	1.44492e+06	1.27055e+06	1.25429e+06
Gb3 d42:1_32.45	Gb3 d42:1	32.45	C60 H113 N O18	-0.92	1135.79	1136.8	[M+H]+1	54920.9	49456.6	69104.1	56789.6	60073.8	62220.1	64366.2	41527.6	66427.2	80125.6	79670.7	55726.4	45585.3	49129.6	52704.4	73777.3	51222.5	56416.5	40150.9	71870.7	47606.1	51281.4	43450.3	53691.5	65829.5	63208.4	43209.1	113066	70463.9	45036.2	106041	46399.5	55982.6	61826.9	45963.3	51666.7	55284	62715.5	49402.4	93936.6	50043.8	64686.2
Gb3 d42:4_31.17	Gb3 d42:4	31.17	C60 H107 N O18	0.14	1129.75	1130.76	[M+H]+1	449549	214624	338291	363184	1.30702e+06	580583	392445	179979	479272	753997	1.991e+06	252089	183598	191858	349793	762051	347851	276009	226575	602059	172717	471385	174851	237484	638447	332304	185922	1.41915e+06	306001	186355	350607	244581	204510	1.46768e+06	199808	234104	466471	289815	199956	347484	214540	218822
Gb3 d42:4_28.34	Gb3 d42:4	28.34	C60 H107 N O18	4.87	1129.75	1130.76	[M+H]+1	1.12214e+06	1.45322e+06	2.68458e+06	3.60082e+06	1.97498e+06	1.20448e+06	1.13066e+06	1.06793e+06	3.20409e+06	2.69452e+06	2.12854e+06	853162	1.01709e+06	1.05882e+06	2.42883e+06	1.87597e+06	2.23372e+06	1.72077e+06	1.23405e+06	1.24142e+06	687889	819577	907420	1.26471e+06	1.61498e+06	1.75664e+06	922127	2.85654e+06	871617	1.18886e+06	1.73546e+06	856544	1.13763e+06	781621	914368	892484	1.20135e+06	1.55125e+06	1.03126e+06	3.00338e+06	1.02485e+06	848170
Gb3 d43:5_30.06	Gb3 d43:5	30.06	C61 H107 N O18	-1.91	1141.75	1142.75	[M+H]+1	185539	158098	211383	249921	191986	169225	182513	177225	187994	184630	193411	202848	176355	173217	164630	186165	155530	181916	168259	182497	186565	219730	203890	212747	241639	193173	174476	214307	192347	167764	228374	182774	192372	242660	197449	203975	239326	192621	180910	201169	180943	183512
Gb3 d43:5_30.31	Gb3 d43:5	30.31	C61 H107 N O18	3	1141.75	1142.76	[M+H]+1	224357	202110	274709	256418	255526	248295	273768	250856	243607	260896	247697	229114	224029	344883	196355	225109	197348	216998	194198	231643	240764	219914	250318	234397	270299	275966	240279	316531	285420	199770	327163	223983	245051	258865	220439	278768	269432	346305	259744	232656	243994	232195
Gb3 d44:4_32.95	Gb3 d44:4	32.95	C62 H111 N O18	0.08	1157.78	1158.79	[M+H]+1	266911	140781	338308	217323	1.12726e+06	314076	326017	378994	344830	694084	1.18488e+06	185956	314302	370207	138300	637682	290644	229176	131356	510871	328986	170270	313854	305726	567614	251536	121773	1.12214e+06	304885	124415	366217	157943	150252	1.20613e+06	274166	282543	292375	304676	258680	269501	149721	201365
Gb3 d45:1_35.47	Gb3 d45:1	35.47	C63 H119 N O18	-1.36	1177.84	1178.85	[M+H]+1	176909	286466	375387	331394	171046	156547	415386	239521	272689	182872	162773	359812	243496	133420	222058	196970	289448	356437	229597	170544	207793	420627	204727	226815	284999	451723	216702	316546	219987	181193	352010	165965	244343	294409	139084	223660	286514	225470	171363	361912	220781	368736
Gb3 d47:2_2.93	Gb3 d47:2	2.93	C65 H121 N O18	-8.82	1203.85	602.931	[M+2H]+2	4.87373e+07	6.90275e+07	8.32527e+07	6.17677e+07	1.0478e+08	4.52752e+07	3.58091e+07	8.94035e+07	1.17729e+08	5.39859e+07	1.01577e+08	6.80597e+07	6.4854e+07	8.73598e+07	5.68402e+07	7.85057e+07	6.56237e+07	6.97906e+07	115850	141845	125935	9.27731e+07	148758	128009	118736	7.75047e+07	6.29476e+07	8.80041e+07	6.25841e+07	8.07926e+07	1.21557e+08	5.66777e+07	8.52787e+07	107259	97465.6	84716.6	93385.8	89119.9	8.2968e+07	1.09072e+08	1.15471e+08	7.8634e+07
Gb3 d47:6_30.02	Gb3 d47:6	30.02	C65 H113 N O18	6.74	1195.8	1196.81	[M+H]+1	344875	308564	374816	496944	283906	331615	399869	349154	389382	344788	377934	465315	420025	377878	297916	391898	321379	346426	316917	400409	468841	479717	348854	543228	588656	439976	351065	442973	379716	406547	440823	382053	392886	504079	400118	453319	483407	488059	321762	375833	409926	367478
Gb3 d48:2_3.57	Gb3 d48:2	3.57	C66 H123 N O18	-8.62	1217.86	609.939	[M+2H]+2	1.20411e+08	1.82885e+08	2.36315e+08	1.35516e+08	2.40821e+08	2.16939e+08	2.19937e+08	2.4233e+08	2.6078e+08	2.37233e+08	3.14016e+08	1.63737e+08	2.28714e+08	2.55507e+08	1.54264e+08	2.26147e+08	1.42715e+08	2.07714e+08	138747	125861	115049	3.11442e+08	109209	111186	101196	1.67411e+08	1.81015e+08	2.57857e+08	2.46653e+08	2.43842e+08	3.26248e+08	2.08749e+08	2.55141e+08	91561.1	86010.9	81188.6	94744.8	81259.1	2.2635e+08	2.13239e+08	2.22528e+08	2.99656e+08
Gb3 d48:6_24.09	Gb3 d48:6	24.09	C66 H115 N O18	-2.64	1209.81	1210.82	[M+H]+1	771813	473308	704365	740676	390158	325982	528918	579215	705810	463779	486227	631771	632833	518741	395219	500092	416309	499856	679146	670850	607272	639376	615679	711648	795994	495141	492260	648398	622299	466777	902631	579998	554865	787746	586544	829942	668949	864876	525249	556572	981791	557197
Gb3 d49:2_4.21	Gb3 d49:2	4.21	C67 H125 N O18	-8.26	1231.88	616.947	[M+2H]+2	2.95771e+08	2.42684e+08	3.77461e+08	2.08552e+08	3.49547e+08	2.73819e+08	2.84825e+08	3.40301e+08	2.99575e+08	2.56979e+08	4.27966e+08	3.07048e+08	3.577e+08	3.67019e+08	2.66222e+08	2.02898e+08	2.58009e+08	2.21221e+08	902436	1.88385e+06	903572	3.75983e+08	597425	979187	711512	2.81607e+08	3.66015e+08	3.67943e+08	3.68168e+08	3.67233e+08	4.44997e+08	3.20408e+08	3.68165e+08	975843	714941	734671	707231	670460	3.44475e+08	4.49291e+08	4.01223e+08	4.38036e+08
Gb3 d49:3_5.15	Gb3 d49:3	5.15	C67 H123 N O18	-1.52	1229.87	1230.88	[M+H]+1	1.25539e+07	1.57999e+07	1.8743e+07	1.40422e+07	1.73897e+07	1.32533e+07	1.42574e+07	1.36723e+07	1.93182e+07	1.0425e+07	1.45718e+07	1.48806e+07	1.56031e+07	1.737e+07	1.7109e+07	1.44154e+07	9.66738e+06	9.58611e+06	285671	542557	269651	1.382e+07	285486	293133	297654	1.09413e+07	1.41761e+07	1.60866e+07	1.75233e+07	2.03604e+07	2.36099e+07	1.44375e+07	1.45888e+07	236078	227053	236311	244383	229276	1.63803e+07	1.78249e+07	1.63551e+07	2.01414e+07
Gb3 d49:4_6.01	Gb3 d49:4	6.01	C67 H121 N O18	5.14	1227.86	1228.87	[M+H]+1	744879	693059	1.29248e+06	892027	741842	973680	533518	1.00488e+06	1.22786e+06	1.08493e+06	1.1903e+06	721488	1.24028e+06	387880	631943	867178	605070	763601	71632	124078	75671.5	1.07419e+06	68324.2	60117.7	74177.7	512692	589976	1.31149e+06	1.2565e+06	1.03044e+06	1.14932e+06	867274	933607	82605.4	66129.8	79900.9	68580.2	71273.4	922592	916103	1.22432e+06	799689
Gb3 d50:2_5.13	Gb3 d50:2	5.13	C68 H127 N O18	-8.06	1245.9	623.955	[M+2H]+2	2.0942e+08	2.4607e+08	2.71952e+08	2.56182e+08	2.51634e+08	2.57894e+08	2.22076e+08	2.76654e+08	3.37325e+08	2.40749e+08	2.16255e+08	2.12957e+08	2.62207e+08	3.19047e+08	2.34239e+08	2.67862e+08	2.56108e+08	2.18669e+08	291981	554541	275608	2.8489e+08	291792	299608	307693	2.19802e+08	2.50344e+08	2.77238e+08	3.08472e+08	2.99606e+08	3.58089e+08	2.31697e+08	2.47406e+08	241293	232068	241530	249781	234340	2.50386e+08	2.77941e+08	2.91936e+08	3.46281e+08
Gb3 d50:6_22.78	Gb3 d50:6	22.78	C68 H119 N O18	-5.9	1237.84	1238.84	[M+H]+1	222497	212408	328589	276541	185743	217626	265935	268837	334654	310772	238977	247899	312555	212069	239811	349800	297335	295557	312188	305534	305050	283658	355042	232068	389224	353193	245875	453830	322848	238028	267005	241339	305789	248714	258790	291889	319071	300462	236626	341864	229087	316219
Gb3 t30:2_22.97	Gb3 t30:2	22.97	C48 H87 N O19	-3.44	981.584	982.591	[M+H]+1	863791	511513	1.27359e+06	606975	629290	511349	338423	801894	2.4332e+06	768116	727818	851530	395186	1.2077e+06	487433	1.28313e+06	1.42326e+06	993528	779437	743326	543126	373691	1.52691e+06	855422	1.51282e+06	1.02619e+06	404433	958229	1.28434e+06	1.57383e+06	616188	852597	480987	1.23208e+06	1.33974e+06	1.40101e+06	409186	501794	1.28142e+06	717301	581715	697529
Gb3 t30:2_32.55	Gb3 t30:2	32.55	C48 H87 N O19	1.25	981.588	980.581	[M-H]-1	317188	279953	252486	239135	764543	576123	210680	263107	705323	707682	986121	180485	247206	224330	309475	968005	216433	415163	284220	426004	407229	377517	212775	252191	403474	208064	227401	1.115e+06	601522	192467	295733	224013	309548	195415	242387	287407	357278	310571	265352	584312	251524	257699
Gb3 t30:4_29.32	Gb3 t30:4	29.32	C48 H83 N O19	-8.5	977.548	976.54	[M-H]-1	81515.1	91728.5	98177.3	143371	135042	131330	91361.8	81871.2	177638	420726	160879	84538	101139	115620	97169	117997	139036	88451	81526.3	186346	110333	89893.3	98505	69136.4	128802	96263.6	86598.7	184643	141437	82584.8	137787	78334.5	116174	93070.7	77073.4	107362	94332.2	129416	148502	210932	144563	95098.3
Gb3 t30:4_28.27	Gb3 t30:4	28.27	C48 H83 N O19	-0.82	977.555	976.548	[M-H]-1	328089	285069	582340	867035	398282	458018	279930	294380	914744	631436	547152	367680	347657	651443	727027	599886	795018	378331	341507	741347	293092	386694	464359	812719	515588	343037	288580	594344	396676	343169	442371	278684	412629	245155	285641	316802	488871	751570	602007	875151	436067	382704
Gb3 t30:6_28.72	Gb3 t30:6	28.72	C48 H79 N O19	-4.28	973.52	972.513	[M-H]-1	142267	126124	294838	137703	156988	178408	91712.4	118065	252139	174785	276766	136929	111138	183035	122048	160677	174893	185346	132614	245620	146377	164381	161505	110469	137156	130817	123407	186214	157597	103781	242560	112034	153522	135755	120835	186674	163082	237540	187493	216271	193282	157681
Gb3 t30:6_28.14	Gb3 t30:6	28.14	C48 H79 N O19	-0.21	973.524	972.517	[M-H]-1	183724	173833	220845	344964	285155	309593	178161	165865	445432	353728	419545	309619	197244	338084	243790	253973	286776	198671	180426	411553	195756	231737	248097	139493	300926	215478	181185	366147	218288	212638	295654	195138	226184	200782	166778	219111	278928	602152	274456	402781	255091	245483
Gb3 t30:6_27.93	Gb3 t30:6	27.93	C48 H79 N O19	4.75	973.529	972.522	[M-H]-1	5.4246e+06	4.36023e+06	5.1019e+06	6.56315e+06	7.34303e+06	1.02398e+07	6.52435e+06	5.4671e+06	1.05556e+07	7.36706e+06	8.86399e+06	5.8004e+06	5.71063e+06	9.24669e+06	4.91215e+06	6.73461e+06	8.29016e+06	4.72791e+06	6.77095e+06	1.20857e+07	7.17738e+06	5.44416e+06	8.96381e+06	4.65254e+06	7.27111e+06	4.2783e+06	5.40396e+06	7.89691e+06	4.33004e+06	4.91382e+06	5.79091e+06	5.35296e+06	6.32755e+06	5.05428e+06	4.79003e+06	5.87714e+06	5.94889e+06	8.65349e+06	8.05871e+06	8.03573e+06	7.54056e+06	5.3416e+06
Gb3 t31:3_28.38	Gb3 t31:3	28.38	C49 H87 N O19	1.74	993.589	992.582	[M-H]-1	2.11403e+06	3.25497e+06	8.2754e+06	9.14498e+06	3.81694e+06	3.84267e+06	2.52956e+06	3.76589e+06	4.21584e+06	7.17876e+06	5.06162e+06	2.2298e+06	2.85459e+06	2.99808e+06	5.07055e+06	5.64997e+06	6.93827e+06	4.00698e+06	3.30725e+06	3.60714e+06	1.73165e+06	1.35074e+06	3.48095e+06	4.56908e+06	4.49421e+06	3.96245e+06	1.86731e+06	5.1632e+06	1.58112e+06	3.45853e+06	4.32304e+06	1.54828e+06	3.17817e+06	379083	2.19981e+06	962353	3.398e+06	5.83734e+06	3.11201e+06	8.48208e+06	2.32397e+06	2.88346e+06
Gb3 t31:3_29.07	Gb3 t31:3	29.07	C49 H87 N O19	3.87	993.591	992.584	[M-H]-1	298164	156962	274115	257758	211695	297932	203438	149853	378814	212610	287283	134923	197114	226617	186577	191609	243818	167354	157465	288409	254544	305239	158891	136463	167369	149158	152015	256123	261887	116085	153841	143532	197675	191889	160338	270322	290320	243428	271731	259293	277285	153607
Gb3 t31:4_26.32	Gb3 t31:4	26.32	C49 H85 N O19	5.45	991.577	990.57	[M-H]-1	200373	172334	411135	969779	429426	345383	175388	186088	524987	799930	466006	265555	170643	357604	302001	867357	407033	264355	267315	539937	260395	190499	306690	190887	323409	244805	195551	610861	206351	243915	349898	333495	236729	172821	184142	231463	340341	339625	235484	735283	262334	449655
Gb3 t31:6_24.52	Gb3 t31:6	24.52	C49 H81 N O19	1.54	987.542	986.535	[M-H]-1	4.96489e+06	6.25035e+06	6.82679e+06	3.91678e+06	8.47338e+06	8.49796e+06	4.09665e+06	5.09475e+06	3.9449e+06	1.12839e+07	6.16248e+06	3.6366e+06	4.82467e+06	4.73319e+06	5.99811e+06	7.79678e+06	5.86598e+06	5.91522e+06	4.24791e+06	5.23055e+06	2.32146e+06	4.79226e+06	3.78402e+06	2.56471e+06	5.45472e+06	6.8898e+06	3.4526e+06	1.27701e+07	5.14649e+06	5.22181e+06	8.66314e+06	1.59495e+06	2.95842e+06	6.98258e+06	6.33919e+06	2.59607e+06	3.3522e+06	7.15016e+06	3.74263e+06	7.45879e+06	5.79442e+06	4.8642e+06
Gb3 t32:2_2.5	Gb3 t32:2	2.5	C50 H91 N O19	3.68	1009.62	1010.63	[M+H]+1	645167	995559	469739	1.11966e+06	710539	787640	813665	749506	1.06774e+06	1.05791e+06	565243	850792	1.0697e+06	740159	422286	620021	478094	395863	80566.5	82960.6	70499.3	1.07233e+06	85252.3	67190.7	82882.3	483538	556197	377338	816032	599134	499263	559253	1.96606e+06	83575.6	71464.1	60887.7	101471	61550.9	605707	720757	934654	1.75968e+06
Gb3 t33:0_34.36	Gb3 t33:0	34.36	C51 H97 N O19	9.62	1027.68	1026.67	[M-H]-1	217027	243618	227038	214446	82220	151623	190901	172359	195267	190407	104402	165414	261210	195861	163542	165089	193382	171144	227768	201482	188482	169022	187541	166198	205022	156236	155014	247257	316592	171318	199491	177978	241119	169743	174960	185787	149844	191405	264240	219205	227164	242795
Gb3 t33:3_33.27	Gb3 t33:3	33.27	C51 H91 N O19	7.66	1021.63	1020.62	[M-H]-1	123899	221707	232445	238385	196292	180246	200228	165761	211491	178279	109918	200951	179043	289349	137913	165511	218752	140968	178158	227717	204087	187657	228322	129373	199716	233488	191463	162607	272551	164028	252532	203431	200989	207305	189385	161434	160795	166980	250568	221087	271080	277034
Gb3 t33:6_26.83	Gb3 t33:6	26.83	C51 H85 N O19	1.74	1015.57	1014.57	[M-H]-1	1.18175e+06	1.89929e+06	3.8962e+06	801326	3.45486e+06	1.68176e+06	1.5828e+06	2.63857e+06	2.36498e+06	4.13024e+06	2.96273e+06	1.58845e+06	1.65895e+06	787052	3.19042e+06	2.75342e+06	2.80201e+06	2.26036e+06	1.09338e+06	1.43409e+06	680373	1.83543e+06	1.20995e+06	1.60101e+06	3.66643e+06	3.66633e+06	1.25912e+06	2.13381e+06	557619	1.29338e+06	4.36267e+06	445492	748175	1.22363e+06	1.64783e+06	720398	999176	2.91917e+06	1.16702e+06	2.64385e+06	1.67482e+06	630575
Gb3 t34:0_25.05	Gb3 t34:0	25.05	C52 H99 N O19	1.12	1041.68	1042.69	[M+H]+1	1.98983e+06	2.68391e+06	3.79177e+06	3.85644e+06	2.66987e+06	2.85787e+06	1.16781e+06	1.47554e+06	4.19849e+06	6.82653e+06	4.07047e+06	2.02719e+06	1.16418e+06	1.91076e+06	3.46511e+06	3.0428e+06	2.44147e+06	2.52827e+06	2.04537e+06	3.70272e+06	2.12982e+06	1.46896e+06	2.62903e+06	2.40559e+06	1.7637e+06	3.85628e+06	1.32644e+06	5.26667e+06	2.87685e+06	995112	3.75787e+06	1.00162e+06	2.15252e+06	4.61592e+06	1.24402e+06	2.71357e+06	1.4407e+06	3.68428e+06	1.09022e+06	3.12628e+06	1.84855e+06	2.80162e+06
Gb3 t35:0_30.93	Gb3 t35:0	30.93	C53 H101 N O19	7.82	1055.71	1054.7	[M-H]-1	17534.8	18903.5	27714.9	30715.5	15256.4	16893.6	24831.6	16682.5	27759.7	21615.8	17386.4	22386.2	21553.4	26410.7	13915.2	16927.9	25295.3	20417	18210.8	25379.6	18515.9	22195.3	18888.9	16974.8	20506.4	30623.1	17414.7	17428.1	31149.5	17406.3	26692.6	17121.5	22169.3	19357	16941	23192.5	22077.8	21036.7	25228.7	24538.7	25228.4	24984.6
Gb3 t35:1_25.3	Gb3 t35:1	25.3	C53 H99 N O19	1.46	1053.68	1054.69	[M+H]+1	1.02737e+06	1.783e+06	2.03427e+06	1.69229e+06	2.27309e+06	2.9844e+06	1.15377e+06	971829	2.51622e+06	3.0062e+06	2.94954e+06	1.37428e+06	1.23133e+06	1.53075e+06	2.12906e+06	1.98541e+06	1.23055e+06	1.28304e+06	1.15398e+06	1.81426e+06	1.48019e+06	875194	1.02696e+06	1.52387e+06	1.78745e+06	2.28184e+06	986241	2.54364e+06	1.80658e+06	968041	1.91584e+06	872894	1.22402e+06	2.56537e+06	1.26026e+06	1.83118e+06	1.37701e+06	1.37561e+06	724720	1.98966e+06	1.10664e+06	1.49575e+06
Gb3 t35:2_29.79	Gb3 t35:2	29.79	C53 H97 N O19	-5.36	1051.66	1052.67	[M+H]+1	618223	546176	1.0345e+06	758078	1.83309e+06	799024	718637	587680	837174	1.29388e+06	1.88768e+06	578159	575340	531753	722294	996494	740028	797255	507406	1.29292e+06	563285	522545	505180	689382	843651	790591	491713	2.10806e+06	826067	522036	884289	562495	514788	1.24996e+06	577215	597058	925478	746867	522236	1.62554e+06	548216	555540
Gb3 t35:3_32.46	Gb3 t35:3	32.46	C53 H95 N O19	-4.61	1049.64	1048.64	[M-H]-1	206221	206431	238211	183988	152283	213352	173852	212337	228915	250074	222690	154373	233230	211332	172397	263353	202135	196903	226418	330498	180626	197726	169055	214595	219971	155358	184254	329521	235403	180102	203609	292184	250067	171459	194473	194695	177035	215875	250350	314291	188723	232171
Gb3 t35:5_31.3	Gb3 t35:5	31.3	C53 H91 N O19	7.44	1045.63	1044.62	[M-H]-1	261777	423976	328381	420683	673241	496903	326460	427136	605595	669400	759850	407722	295153	502655	812303	516438	405472	281660	243539	680274	361645	327330	311682	269908	588367	381840	516685	515290	804647	283139	692167	298500	459480	476302	356301	306121	287250	428009	474999	698112	477381	427318
Gb3 t36:0_8.89	Gb3 t36:0	8.89	C54 H103 N O19	0.76	1069.71	1070.72	[M+H]+1	46237.4	82536.7	80784.9	44127.3	108223	61086.3	190469	44845.1	67488.3	82002.6	85212.5	50716.4	47595	47782.1	59854.9	76822.6	44545.9	44178	76908.6	72977.1	57376.1	68103	80308.5	62568.5	73230.8	126350	54723.3	75873.5	61184.4	43727.8	46597.9	62269.5	47031.5	94994.9	70631.9	66955.8	74625.7	73139.3	42650	61549.5	48025.7	65158.6
Gb3 t36:2_6.51	Gb3 t36:2	6.51	C54 H99 N O19	1.33	1065.68	1066.69	[M+H]+1	105411	111884	130793	114208	256056	174457	122725	116776	165988	239134	223273	106705	105870	118871	138901	170427	111130	105204	105956	161085	130244	125589	102540	527184	114612	110484	103640	202741	124637	112516	132579	109707	109182	150345	110177	115059	113113	103526	110710	147646	130519	123728
Gb3 t36:3_4.36	Gb3 t36:3	4.36	C54 H97 N O19	2.96	1063.67	1064.68	[M+H]+1	425060	375975	376599	383324	738522	548889	447986	349414	717427	719697	565101	385053	391843	415038	363589	516620	376439	280167	215604	450077	215875	461266	142733	226191	169990	298709	283786	805418	402414	319201	366195	433574	374257	229902	170809	175523	168967	160182	339628	425212	419359	557821
Gb3 t38:2_32.58	Gb3 t38:2	32.58	C56 H103 N O19	1.7	1093.71	1094.72	[M+H]+1	264218	244699	362210	406442	356162	394618	304165	242769	318126	490454	434825	196703	204464	186429	216867	380109	237419	259239	195229	441562	191351	247113	169785	232451	305620	284208	182977	711894	400449	175839	425580	215720	260849	221078	212615	276641	255218	301034	213836	591734	210428	265448
Gb3 t39:1_29.75	Gb3 t39:1	29.75	C57 H107 N O19	2.5	1109.75	1110.75	[M+H]+1	430928	380708	721094	648637	1.27774e+06	556954	500921	409638	583547	901893	1.3158e+06	316435	373854	370655	503470	694599	515832	555721	353684	901220	392634	368761	352132	502754	613536	551076	342745	1.46941e+06	575804	363882	729982	392083	335938	871275	402344	387260	645098	520599	364021	1.13307e+06	382130	363877
Gb3 t40:5_31.31	Gb3 t40:5	31.31	C58 H101 N O19	-4.97	1115.69	1114.68	[M-H]-1	249151	337174	312544	400394	640771	472937	310715	406536	576388	595063	575717	388058	280918	478412	270955	491530	385916	268076	231793	647465	344203	311543	296650	256890	559991	363424	491766	490438	765840	269484	658785	284103	437320	453330	339117	262233	273396	407366	452090	664442	454357	406709
Gb3 t40:6_12.21	Gb3 t40:6	12.21	C58 H99 N O19	-7.72	1113.67	1114.68	[M+H]+1	143676	157187	137561	98592.3	367509	150353	167559	156556	197196	173528	204288	156543	157560	186935	143021	153124	126880	135646	58534.1	56972.7	50295.6	156672	58232.6	59202.8	65222.6	149195	451621	162657	189950	168074	163468	148691	157308	70109	55526.9	58783.9	58993.7	78796.7	142737	160938	152763	164146
Gb3 t41:1_31.25	Gb3 t41:1	31.25	C59 H111 N O19	2.4	1137.78	1138.79	[M+H]+1	225525	327297	446136	524381	629414	324480	462453	254475	365910	473643	504721	321071	255829	262275	282619	388877	291300	324329	291686	411115	236938	321782	219705	210921	385567	472297	289821	751567	454918	219598	468886	241675	287147	332824	244309	288387	283062	373613	292476	545783	285681	297037
Gb3 t41:6_31.61	Gb3 t41:6	31.61	C59 H101 N O19	-6.97	1127.69	1126.68	[M-H]-1	962558	1.25476e+06	1.43466e+06	1.21569e+06	955046	1.17777e+06	967027	975817	1.25787e+06	1.09761e+06	1.25397e+06	812241	1.10409e+06	1.30017e+06	947913	946274	1.24382e+06	1.12395e+06	1.14318e+06	2.15398e+06	1.21683e+06	937505	993429	1.20932e+06	1.40268e+06	736242	1.13993e+06	1.07579e+06	1.14461e+06	963290	922642	996437	991415	1.49076e+06	1.02174e+06	1.00227e+06	1.09203e+06	1.1539e+06	1.53431e+06	1.71577e+06	1.2832e+06	1.35923e+06
Gb3 t42:0_12.91	Gb3 t42:0	12.91	C60 H115 N O19	-6.78	1153.8	1154.81	[M+H]+1	200941	335960	212533	173002	489646	385710	426064	265304	224124	303733	296670	217150	381509	218697	237614	210548	467892	395530	183193	163685	214103	839445	310935	254448	151936	176924	191277	295761	281941	459397	375283	234484	425785	298556	173548	149084	301981	170263	288493	187873	361464	410369
Gb3 t42:0_33.35	Gb3 t42:0	33.35	C60 H115 N O19	1.16	1153.81	1154.81	[M+H]+1	392785	550094	1.0242e+06	1.06843e+06	558029	469906	1.00192e+06	424402	849466	650941	666580	416394	599070	546511	382373	519862	599884	692664	517453	781413	449037	605721	392653	495990	652463	714724	409991	882862	825395	471469	939074	433737	589145	621013	450099	568123	710644	530906	703739	814744	589629	695582
Gb3 t42:1_30.14	Gb3 t42:1	30.14	C60 H113 N O19	-7.87	1151.78	1152.79	[M+H]+1	389272	332362	485775	454976	322606	373270	412296	367473	368390	339405	436964	381913	400326	356466	319104	342227	318452	360842	372578	384656	364637	403682	360953	397671	464747	383591	358862	393961	380946	354655	479007	416328	392939	464217	402655	369432	426763	458027	412781	379219	457758	345306
Gb3 t42:6_26.79	Gb3 t42:6	26.79	C60 H103 N O19	0.77	1141.71	1142.72	[M+H]+1	5.31636e+06	5.20347e+06	6.96528e+06	6.06904e+06	4.70328e+06	3.6972e+06	2.19321e+06	6.07966e+06	6.09246e+06	5.2708e+06	6.16238e+06	6.48223e+06	7.39589e+06	5.66534e+06	5.82671e+06	5.40896e+06	6.72332e+06	4.7296e+06	5.57252e+06	6.17662e+06	7.04828e+06	7.82516e+06	7.32233e+06	7.68972e+06	6.78596e+06	6.35928e+06	7.22753e+06	6.87421e+06	5.89545e+06	6.02954e+06	6.64641e+06	6.41163e+06	5.68594e+06	7.6448e+06	7.38606e+06	7.26203e+06	9.76328e+06	7.18777e+06	6.26011e+06	6.27806e+06	6.61305e+06	7.3043e+06
Gb3 t43:1_34.33	Gb3 t43:1	34.33	C61 H115 N O19	7.64	1165.82	1166.82	[M+H]+1	334907	511890	661484	484170	202816	271808	570456	307620	466789	467274	273341	330430	522063	338029	317924	539116	440598	389534	405633	443686	414689	513521	312455	368942	513735	503038	276539	780350	762573	294647	623705	361119	511951	410792	271968	410635	398865	360410	378943	584909	438821	630226
Gb3 t44:4_30.1	Gb3 t44:4	30.1	C62 H111 N O19	-1.73	1173.77	1174.78	[M+H]+1	475209	405735	593016	560854	430842	455674	503316	448597	449717	414333	533429	466225	488703	435160	389551	451601	388755	440503	454829	469574	445135	493102	457556	485462	567346	468273	438085	480933	465045	432949	584754	508237	479685	566699	491546	457746	537078	559142	503908	462936	558814	421537
Gb3 t44:4_29.25	Gb3 t44:4	29.25	C62 H111 N O19	4.61	1173.78	1174.79	[M+H]+1	580450	1.41338e+06	2.11116e+06	1.27575e+06	895814	492768	2.56933e+06	1.07895e+06	1.30693e+06	1.31804e+06	615175	1.37616e+06	1.19788e+06	1.19287e+06	962905	1.07927e+06	1.56568e+06	1.1215e+06	1.0767e+06	1.08887e+06	714769	1.74116e+06	1.06423e+06	879513	1.05082e+06	2.52445e+06	882814	1.27581e+06	1.56978e+06	1.05313e+06	1.38048e+06	591056	581091	814168	825381	1.48431e+06	983542	951830	1.04352e+06	2.02545e+06	1.30877e+06	1.8798e+06
Gb3 t44:5_25.48	Gb3 t44:5	25.48	C62 H109 N O19	-0.36	1171.76	1172.77	[M+H]+1	1.71922e+06	1.44434e+06	1.63325e+06	1.88119e+06	2.37438e+06	1.57101e+06	1.35809e+06	1.52637e+06	2.2283e+06	2.65681e+06	2.28399e+06	1.0825e+06	1.72149e+06	1.59269e+06	1.59937e+06	2.29387e+06	1.57346e+06	1.74771e+06	1.9927e+06	2.20115e+06	1.7269e+06	1.19033e+06	1.06962e+06	1.11983e+06	1.29138e+06	1.92274e+06	1.31598e+06	3.12274e+06	1.81247e+06	1.69279e+06	1.93436e+06	1.69479e+06	1.15496e+06	1.09359e+06	1.29035e+06	1.25748e+06	1.26704e+06	1.15653e+06	1.09266e+06	2.34645e+06	1.47216e+06	1.27156e+06
Gb3 t45:6_35.08	Gb3 t45:6	35.08	C63 H109 N O19	-1.88	1183.76	1182.75	[M-H]-1	871876	802532	1.10984e+06	832973	443743	408036	649925	647127	758978	531016	692376	699469	583840	859328	581873	730231	735141	689288	824645	735933	893560	769141	720668	742842	583970	659480	823682	719779	997400	846142	622854	761056	557526	769709	871086	782667	912827	609868	1.27842e+06	625422	721779	608628
Gb3 t45:6_29.82	Gb3 t45:6	29.82	C63 H109 N O19	1.4	1183.76	1184.77	[M+H]+1	338484	296126	417787	447442	542259	404615	292173	290011	359175	408966	602720	342141	340473	271399	263400	328895	317965	389280	300271	438848	296267	309230	252963	355166	461489	318757	248224	866377	316507	295050	382715	316968	277437	443375	316695	353326	416852	319858	286839	492216	324422	328756
Gb3 t49:2_2.91	Gb3 t49:2	2.91	C67 H125 N O19	-8.27	1247.87	624.944	[M+2H]+2	2.85973e+07	3.45099e+07	3.17661e+07	2.93073e+07	5.67775e+07	2.8163e+07	2.78504e+07	3.12871e+07	4.56483e+07	3.0823e+07	5.64784e+07	3.57728e+07	3.43167e+07	2.60414e+07	2.87757e+07	3.78528e+07	2.50039e+07	2.715e+07	149659	183830	152839	3.96099e+07	178095	153254	172198	2.84879e+07	3.74311e+07	4.62932e+07	4.34678e+07	3.80103e+07	5.71914e+07	2.89775e+07	4.02429e+07	140812	116687	101424	140739	114216	3.94447e+07	3.78628e+07	5.44742e+07	4.58629e+07
Gb3 t49:6_26.07	Gb3 t49:6	26.07	C67 H117 N O19	9.92	1239.83	1240.84	[M+H]+1	458212	733052	1.4791e+06	3.92156e+06	1.05024e+06	684779	462911	543034	1.47529e+06	2.97335e+06	1.60513e+06	392032	583648	748108	2.57474e+06	1.47016e+06	1.89479e+06	976721	737895	772878	511323	447958	675051	547039	764831	1.02406e+06	422766	1.94915e+06	581198	692757	811510	527002	664399	463788	444002	496786	650048	883025	479177	1.09769e+06	529341	711632
Gb3 t50:2_3.39	Gb3 t50:2	3.39	C68 H127 N O19	-7.92	1261.89	631.952	[M+2H]+2	1.19825e+08	1.71028e+08	1.5602e+08	1.11408e+08	1.78421e+08	1.02377e+08	1.32418e+08	1.49657e+08	2.21024e+08	1.21986e+08	1.89593e+08	1.46476e+08	1.03049e+08	1.33425e+08	8.5141e+07	8.39297e+07	1.12527e+08	1.27112e+08	204008	191080	173251	1.97382e+08	217122	194699	173737	1.30552e+08	1.39032e+08	1.55501e+08	1.79284e+08	1.18584e+08	1.46761e+08	8.87319e+07	1.86489e+08	170738	159918	123577	207801	157857	1.44418e+08	1.83604e+08	2.19441e+08	1.83365e+08
GD1 d31:2_26.27	GD1 d31:2	26.27	C79 H136 N4 O39	4.69	1764.89	883.451	[M+2H]+2	729784	1.00717e+06	2.29488e+06	1.72851e+06	1.62079e+06	1.10979e+06	912755	1.03545e+06	2.28639e+06	2.25666e+06	2.1529e+06	730693	766236	770830	1.5526e+06	1.48507e+06	1.42951e+06	1.35937e+06	1.05333e+06	1.41106e+06	726425	672733	815372	968876	1.06913e+06	1.45695e+06	668305	2.28282e+06	873733	894910	1.49202e+06	815059	1.01298e+06	1.13716e+06	709413	837505	987916	868627	595274	1.95793e+06	774234	790583
GD1 d33:4_22.72	GD1 d33:4	22.72	C81 H136 N4 O39	-7.31	1788.87	895.44	[M+2H]+2	387614	435713	484885	567270	381016	446418	545514	551466	686478	474706	490214	383759	641146	435018	424996	479110	609926	490274	1.25772e+07	4.52713e+06	2.33814e+06	509133	7.75402e+06	1.1044e+07	1.07265e+07	724506	504364	930944	485507	488269	547710	436918	514557	1.28168e+07	1.05311e+07	6.8191e+06	1.2418e+07	6.50517e+06	485392	701268	469927	441591
GD1 d33:6_26.29	GD1 d33:6	26.29	C81 H132 N4 O39	9.73	1784.86	893.439	[M+2H]+2	313087	284220	577186	661706	476352	351306	391121	303413	602620	892789	547048	273492	299986	297300	419539	408774	405391	451629	412211	338646	252901	317065	282726	319289	359442	423315	225864	793159	288933	271312	555153	287852	407772	368189	272016	331110	326359	335774	287837	684755	388723	301138
GD1 d34:1_21.26	GD1 d34:1	21.26	C82 H144 N4 O39	-0.64	1808.94	903.462	[M-2H]-2	108164	131459	57892.5	89724.2	841285	114059	71877.7	113395	155789	603409	491020	88090.6	111791	117329	112666	482873	76725.2	96959.3	96845.5	418940	105353	211301	58088.8	132700	172422	323813	97284.6	353418	106743	118106	124407	90758.1	88417.3	125445	140607	108442	237218	97612	57354.2	74105.6	113778	80419
GD1 d34:2_18.45	GD1 d34:2	18.45	C82 H142 N4 O39	2.61	1806.93	902.458	[M-2H]-2	31086.7	38632.2	53705.9	22374.1	31344.8	20661	18979.5	37449.4	30178.2	27126.4	33036.4	19390.6	26436.3	23189.3	34763.9	34656.3	21737.6	18685.1	21776.4	22500.7	19526.8	27930.6	16434.3	30343.9	24025.2	25826.4	25175.9	28016.6	45465.5	37530.9	17685.1	24395.7	29284.3	33924.5	27758.5	20270.7	24732.3	15871.1	19463.3	19917.7	18458.6	28451.9
GD1 d34:4_21.81	GD1 d34:4	21.81	C82 H138 N4 O39	6.14	1802.9	902.46	[M+2H]+2	91551.8	81640.8	91999.9	132127	97074.3	105296	115107	81150.9	124336	115145	135242	134568	100072	136668	86856	89249.6	99189.5	94716.1	80957.7	130807	90427.3	123852	105103	183973	105083	91256.2	87899.7	142475	102461	104308	179947	128753	70189.6	118279	148511	109316	100623	145696	127854	131205	125075	99523.8
GD1 d35:1_29.07	GD1 d35:1	29.07	C83 H146 N4 O39	-8.66	1822.94	1821.93	[M-H]-1	173714	109155	186315	122430	136668	189809	125708	84323.2	244860	140613	234749	110250	116605	140349	126297	138077	179041	102916	113531	207366	164144	216287	102000	111509	136763	90047.4	94407.6	177153	186774	79240.4	125708	117285	108135	125800	104349	220889	177574	159695	172590	186324	177709	107420
GD1 d36:1_15.16	GD1 d36:1	15.16	C84 H148 N4 O39	4.76	1836.98	919.498	[M+2H]+2	46857.4	45153.5	67247.7	50340.6	61970.7	49896.9	51845.8	43467.9	50770.3	48975.8	51988.6	42817.2	43848	53933.2	53138.6	51450.5	48881.5	46992.2	58776.9	49961.1	48692.8	45182.8	45149.8	48193.5	50042.4	49624.5	43217.2	65740	59183	48127.5	45919.5	47672.4	45169.8	81401.6	47267.9	57504	52596.3	48743.1	54723.3	49525.8	48910.7	42575.2
GD1 d36:2_22.05	GD1 d36:2	22.05	C84 H146 N4 O39	-0.78	1834.95	916.47	[M-2H]-2	327059	285597	231086	323590	418930	261583	272771	274538	398790	490442	629696	192212	244806	263082	295159	427064	321813	277266	319656	306544	243808	235926	253642	344536	395460	314756	257945	653124	319285	346710	326896	215524	299017	363005	328866	295726	287738	314205	188513	315026	286911	268120
GD1 d36:4_25.44	GD1 d36:4	25.44	C84 H142 N4 O39	4.48	1830.93	916.474	[M+2H]+2	2.61322e+06	2.33851e+06	2.66792e+06	3.42999e+06	4.10041e+06	3.15651e+06	2.46506e+06	2.26354e+06	3.6925e+06	4.84418e+06	3.83923e+06	2.20286e+06	2.66074e+06	2.73379e+06	2.91614e+06	3.65013e+06	2.8689e+06	2.34193e+06	2.18451e+06	4.01337e+06	2.77498e+06	2.0779e+06	3.72002e+06	2.04179e+06	2.35458e+06	3.09188e+06	3.74619e+06	5.48536e+06	3.30469e+06	2.37146e+06	2.49148e+06	2.32287e+06	2.63838e+06	1.87474e+06	2.3527e+06	2.29277e+06	2.3102e+06	3.02396e+06	1.79944e+06	3.55031e+06	2.88508e+06	4.57546e+06
GD1 d37:0_24.66	GD1 d37:0	24.66	C85 H152 N4 O39	-7.09	1852.99	1853.99	[M+H]+1	233511	263477	456558	288639	1.09151e+06	467107	241287	491478	789392	929133	970531	204948	262681	298141	448368	750503	301237	388354	191050	1.23267e+06	243667	276084	198479	227282	435544	538800	271829	1.22348e+06	350326	242347	822844	198752	232384	426040	314245	329878	249261	424025	228937	719818	340119	260448
GD1 d37:4_17	GD1 d37:4	17	C85 H144 N4 O39	-8.2	1844.93	923.47	[M+2H]+2	97562.9	185835	110747	94232.9	68050.9	75090.5	162353	285639	250592	318559	77172.4	151765	185406	197711	163574	142971	117164	115487	188447	258495	117857	64714.2	143823	266893	341520	259243	383735	196534	100237	109808	72056.8	253253	309296	327209	482353	149660	491054	419306	147514	174548	104932	265272
GD1 d38:1_26.06	GD1 d38:1	26.06	C86 H152 N4 O39	-0.54	1865	931.494	[M-2H]-2	1.25188e+06	1.13175e+06	2.05725e+06	4.5562e+06	1.99347e+06	1.93116e+06	900411	1.20846e+06	3.56686e+06	3.27754e+06	2.86201e+06	1.54299e+06	1.21896e+06	2.60266e+06	1.90207e+06	1.77746e+06	2.82676e+06	1.57961e+06	1.6232e+06	2.92119e+06	1.40737e+06	1.34962e+06	2.49831e+06	907576	1.9528e+06	1.41787e+06	1.14087e+06	2.84035e+06	1.23587e+06	1.32007e+06	1.92366e+06	1.45108e+06	1.69598e+06	893630	1.26294e+06	1.36026e+06	1.8449e+06	2.58993e+06	1.89578e+06	3.55272e+06	1.50941e+06	1.36591e+06
GD1 d38:3_24.7	GD1 d38:3	24.7	C86 H148 N4 O39	-7.96	1860.96	931.486	[M+2H]+2	543493	689004	712070	709398	1.789e+06	731508	311260	755688	1.29383e+06	1.89239e+06	1.83348e+06	335915	430540	530149	781409	1.52241e+06	602943	547497	378483	2.02038e+06	423349	396499	406591	589707	713867	632927	567172	2.01276e+06	808566	397212	1.34866e+06	399041	365305	685886	515055	479031	414359	698301	402730	1.1798e+06	557463	642062
GD1 d38:4_23.76	GD1 d38:4	23.76	C86 H146 N4 O39	-0.67	1858.96	930.484	[M+2H]+2	1.41032e+06	1.20891e+06	1.31704e+06	1.48503e+06	2.40577e+06	1.31091e+06	1.3551e+06	963101	1.70995e+06	2.28828e+06	1.8954e+06	969521	1.01851e+06	724351	1.20699e+06	2.34648e+06	1.1563e+06	914910	990514	1.11858e+06	1.27204e+06	860233	623001	1.16313e+06	1.11126e+06	1.13523e+06	786729	4.95082e+06	962752	1.13228e+06	768836	1.2037e+06	608869	1.07416e+06	956361	855828	914212	1.04324e+06	750246	2.43548e+06	932395	820159
GD1 d40:1_28.22	GD1 d40:1	28.22	C88 H156 N4 O39	0	1893.03	945.51	[M-2H]-2	368595	277272	570147	903305	374267	490605	320053	265833	914055	705448	622254	311216	303144	559964	430738	454211	711812	342222	405708	768728	350412	454830	484649	247917	537520	363548	301903	567583	403065	364194	644387	301712	437453	296930	293967	346361	499621	841410	612029	881982	506446	320659
GD1 d40:3_26.93	GD1 d40:3	26.93	C88 H152 N4 O39	-1.85	1889	945.508	[M+2H]+2	1.68987e+06	1.32436e+06	3.27972e+06	1.67812e+06	1.403e+06	1.00052e+06	1.57581e+06	1.69251e+06	2.73649e+06	2.92709e+06	3.36845e+06	1.58689e+06	1.67195e+06	2.43182e+06	1.82391e+06	1.62609e+06	1.69283e+06	1.55521e+06	1.37853e+06	2.10287e+06	2.25164e+06	2.36375e+06	1.64404e+06	1.57484e+06	2.62052e+06	2.01444e+06	2.26866e+06	2.20168e+06	2.20733e+06	1.43309e+06	2.61573e+06	1.95989e+06	2.13081e+06	2.21447e+06	1.98132e+06	1.83334e+06	3.52628e+06	2.35334e+06	1.94466e+06	2.95577e+06	2.19467e+06	1.95574e+06
GD1 d40:3_9.46	GD1 d40:3	9.46	C88 H152 N4 O39	2.87	1889.01	945.512	[M+2H]+2	50836.7	88478	93122.1	72074.7	109622	62779.4	97899.5	60433.5	139769	148268	114828	62342.9	60067.5	60185.6	81758.1	95460.3	79330.2	75546	105718	199836	89803.3	64774.2	75832.3	79115.3	109169	106215	56221.7	116410	52240.9	54463	69374.3	66242.3	62676.7	133057	108696	99821.1	108187	115086	58513.6	144376	63706.9	79215.4
GD1 d40:4_26.06	GD1 d40:4	26.06	C88 H150 N4 O39	-0.24	1886.99	944.5	[M+2H]+2	1.85336e+06	2.77371e+06	6.11608e+06	6.87432e+06	5.00304e+06	3.06059e+06	2.24972e+06	2.84583e+06	6.68404e+06	6.6775e+06	5.31172e+06	1.84448e+06	2.92263e+06	3.21952e+06	4.0706e+06	4.94984e+06	5.08261e+06	4.50013e+06	3.29138e+06	4.20398e+06	2.01983e+06	2.01475e+06	3.47131e+06	2.70696e+06	3.43811e+06	4.48774e+06	2.10125e+06	7.29147e+06	2.66316e+06	3.02168e+06	3.84882e+06	2.29972e+06	2.70546e+06	2.10827e+06	1.94088e+06	2.43602e+06	3.20023e+06	3.58241e+06	2.61922e+06	5.844e+06	2.37614e+06	2.39295e+06
GD1 d40:5_26.07	GD1 d40:5	26.07	C88 H148 N4 O39	0.61	1884.97	1883.97	[M-H]-1	1.01281e+06	915612	1.52383e+06	3.68608e+06	1.61277e+06	1.56236e+06	728456	822043	2.71762e+06	2.65162e+06	2.31544e+06	1.03463e+06	986171	2.10562e+06	1.33556e+06	1.43801e+06	2.28692e+06	1.07982e+06	1.31321e+06	2.28881e+06	1.1386e+06	1.09188e+06	1.69003e+06	734253	1.42034e+06	1.09845e+06	922992	2.00935e+06	999849	1.06797e+06	1.5563e+06	1.17396e+06	1.37209e+06	722970	860169	1.10049e+06	1.49257e+06	2.09532e+06	1.53374e+06	2.61951e+06	1.22116e+06	1.10506e+06
GD1 d40:5_24.28	GD1 d40:5	24.28	C88 H148 N4 O39	1.13	1884.97	1883.97	[M-H]-1	189321	163559	270073	430771	153323	153414	198819	164616	328445	228309	202388	176499	242329	206177	170087	175255	263082	207375	166080	331489	139289	218556	176589	130514	227163	200266	191155	275323	279367	141901	261839	141990	253604	171139	136593	176756	180874	254464	163672	350425	274655	231276
GD1 d40:6_24.7	GD1 d40:6	24.7	C88 H146 N4 O39	-7.79	1882.94	942.478	[M+2H]+2	518008	527556	678681	676134	1.70512e+06	520894	296665	720254	1.23316e+06	1.80366e+06	1.74751e+06	306655	353517	505290	744769	1.45102e+06	574671	521825	314821	1.92564e+06	403499	377907	423121	562056	680394	603249	482108	1.91838e+06	770653	316638	1.28542e+06	337019	348176	653725	429859	456569	394930	665558	383846	891302	517170	458112
GD1 d41:1_29.2	GD1 d41:1	29.2	C89 H158 N4 O39	0.15	1907.05	952.518	[M-2H]-2	153244	148113	185637	198965	184420	176988	148163	148946	218811	258812	246650	177934	162650	197345	132847	177774	214891	139960	126961	229942	179050	474201	158747	109241	182362	175095	133671	259220	198737	136448	234714	133662	181819	143650	136607	187630	167669	199491	207222	318159	223978	185011
GD1 d42:1_28.02	GD1 d42:1	28.02	C90 H160 N4 O39	-4.28	1921.06	961.536	[M+2H]+2	1.69823e+06	1.71936e+06	2.62948e+06	2.11707e+06	3.53858e+06	1.64462e+06	2.65419e+06	953927	2.34161e+06	4.41308e+06	3.92796e+06	998661	1.40391e+06	1.29102e+06	1.93355e+06	2.25732e+06	1.74642e+06	1.61955e+06	1.60656e+06	1.82695e+06	1.29204e+06	1.41999e+06	1.07953e+06	1.23971e+06	1.90366e+06	2.29906e+06	1.51586e+06	4.5765e+06	1.72034e+06	1.33568e+06	2.02327e+06	1.31248e+06	1.0242e+06	1.43722e+06	1.67616e+06	1.33358e+06	1.69958e+06	1.63949e+06	1.08412e+06	2.44054e+06	1.26975e+06	1.24176e+06
GD1 d42:1_30.19	GD1 d42:1	30.19	C90 H160 N4 O39	-0.51	1921.07	959.525	[M-2H]-2	223241	205775	241577	350251	271369	232499	254374	217140	326086	220739	245172	273062	272091	329395	221098	220987	335517	247690	247053	334002	253055	241159	325042	216174	341301	233962	228654	219784	305598	223734	274015	247843	294472	251617	230060	253408	256340	316224	315713	298406	302834	265608
GD1 d42:2_28.03	GD1 d42:2	28.03	C90 H158 N4 O39	0.29	1919.05	958.518	[M-2H]-2	1.31225e+06	939426	1.09868e+06	1.73772e+06	1.5004e+06	2.3953e+06	1.35152e+06	945946	2.51179e+06	2.02068e+06	1.86602e+06	1.27242e+06	984553	1.7507e+06	1.02218e+06	1.3009e+06	1.81272e+06	926362	1.24673e+06	2.42073e+06	1.42e+06	1.53902e+06	1.80982e+06	1.08264e+06	1.65327e+06	1.01573e+06	1.16445e+06	1.83872e+06	1.34747e+06	946533	1.41259e+06	1.61866e+06	1.09322e+06	1.00917e+06	1.05631e+06	1.44587e+06	1.7398e+06	1.96882e+06	1.71209e+06	1.98953e+06	1.60108e+06	1.59873e+06
GD1 d42:3_15.16	GD1 d42:3	15.16	C90 H156 N4 O39	-9.26	1917.02	959.516	[M+2H]+2	262621	228949	314789	349515	380716	327562	371610	305683	249879	236219	311361	238765	313489	246993	296278	273820	236497	260492	2.5819e+06	1.25276e+06	1.34255e+06	246250	1.7295e+06	2.06179e+06	1.69163e+06	363705	295331	295597	299732	304168	281664	236816	224825	3.52192e+06	1.37264e+06	2.2483e+06	3.92667e+06	790385	202576	232723	238501	314049
GD1 d42:4_28.22	GD1 d42:4	28.22	C90 H154 N4 O39	-1.78	1915.02	958.515	[M+2H]+2	448127	560193	963526	1.28352e+06	629189	447207	496485	463742	945276	1.28711e+06	1.02243e+06	350413	342218	491762	773760	850171	780805	589153	435926	590109	325238	377693	408825	407383	565000	872023	390254	1.04852e+06	513471	540133	620238	300529	472626	432845	323410	446677	510566	557333	430108	1.10258e+06	543259	397373
GD1 d42:6_26.93	GD1 d42:6	26.93	C90 H150 N4 O39	-2.4	1910.98	956.499	[M+2H]+2	1.01022e+06	1.27962e+06	3.16893e+06	1.62144e+06	1.35561e+06	966720	1.52258e+06	1.63534e+06	2.64406e+06	2.02253e+06	1.99478e+06	1.53328e+06	1.61547e+06	2.34967e+06	1.7623e+06	1.57117e+06	1.63565e+06	1.50268e+06	1.33196e+06	2.03184e+06	2.17558e+06	2.13391e+06	1.22354e+06	1.52164e+06	1.54824e+06	1.94639e+06	2.19203e+06	2.12731e+06	1.69182e+06	1.38468e+06	2.52737e+06	1.89368e+06	2.05883e+06	2.13967e+06	1.91439e+06	1.77141e+06	3.40716e+06	1.68913e+06	1.87897e+06	2.85593e+06	2.03314e+06	1.88968e+06
GD1 d42:6_24.39	GD1 d42:6	24.39	C90 H150 N4 O39	9.05	1911.01	954.496	[M-2H]-2	401077	453369	633961	904283	883717	620190	465327	563626	1.14353e+06	1.20346e+06	1.16788e+06	537592	562172	810159	649062	669380	812468	538518	463404	1.66501e+06	389572	572309	664511	406721	894976	565985	458843	1.25369e+06	582839	388390	1.02856e+06	338486	511285	552251	435485	528458	430701	1.1022e+06	657148	1.18316e+06	740820	594380
GD1 d43:2_12.8	GD1 d43:2	12.8	C91 H160 N4 O39	-7.56	1933.05	967.533	[M+2H]+2	534728	1.00012e+06	652808	477473	855352	1.02642e+06	632510	706004	802516	1.56592e+06	1.65868e+06	577861	575634	782353	657035	851192	1.24512e+06	1.13125e+06	487497	975917	569754	831519	827436	677117	515821	3.06579e+06	1.04182e+06	539572	750277	617376	578813	913928	851926	1.22639e+06	436268	396731	803607	453089	1.08987e+06	499952	968218	647800
GD1 d43:2_29.04	GD1 d43:2	29.04	C91 H160 N4 O39	0.9	1933.07	965.527	[M-2H]-2	464301	301147	503213	358622	333257	559662	407942	270877	666536	420882	532658	259693	421647	443213	337169	420447	519633	321512	378809	637016	483435	573270	292604	268642	317141	259432	308639	456046	541268	228291	368000	281329	345871	355817	292996	731920	562936	594976	502515	439050	508655	340185
GD1 d43:3_7.51	GD1 d43:3	7.51	C91 H158 N4 O39	-7.11	1931.04	966.526	[M+2H]+2	49542.8	62598.2	82984.6	58943.3	90924.4	68920.7	80849.7	57738.2	64898.1	89303.6	75025.5	55260.3	62799.2	55114.4	61041.8	73231	57339.8	55373.7	68481.5	65034.1	63426.1	64358.6	68016.7	52410.2	65682.9	59572	61683.4	64811.4	72241.7	59280.7	63021.9	62165.6	68355.8	57642.8	53487.8	61760.8	61082.5	68696	62053.6	69568.4	55639.6	71062.2
GD1 d43:3_10.04	GD1 d43:3	10.04	C91 H158 N4 O39	-1.75	1931.05	966.531	[M+2H]+2	49333.1	51664	51130.6	47627.4	91013.7	57251	81720	55607.9	61460.7	78765.7	76486.5	56921.5	58741.8	57492	57917.3	65135.2	51532.8	50235.1	333220	149186	153251	72380.2	286891	236430	233199	58853.4	60567.8	59304.9	61662.2	52668.5	57410.9	58504.8	61646.9	310185	302790	228435	314037	245207	69011.9	62881.6	53067.4	60917.4
GD1 d44:2_30.02	GD1 d44:2	30.02	C92 H162 N4 O39	-1.72	1947.08	972.532	[M-2H]-2	231065	209474	216811	303856	150872	206960	226491	208355	307739	192110	236921	259188	226879	245359	202666	204566	300002	254008	227977	296966	238588	270774	295796	195543	333808	246845	225234	201824	294927	215789	243357	273889	271029	218256	216404	257780	242961	260742	277865	325543	292373	242084
GD1 d44:6_26.65	GD1 d44:6	26.65	C92 H154 N4 O39	9.66	1939.04	968.511	[M-2H]-2	528360	349710	626682	669040	918963	912499	487155	378125	1.06108e+06	1.09195e+06	1.26116e+06	443415	437426	769571	525171	696059	778449	432271	418806	1.30147e+06	613406	595392	433460	345352	552887	407106	496829	1.21949e+06	504543	292016	800711	445651	404681	539174	409476	625378	652916	1.00825e+06	609417	933115	546535	487370
GD1 d47:2_10.6	GD1 d47:2	10.6	C95 H168 N4 O39	-8.07	1989.11	995.564	[M+2H]+2	260651	299950	366535	257894	293551	248186	906870	204852	272486	326714	345653	260574	289081	324648	499774	222023	251902	228432	1.14876e+06	541709	434429	326441	935332	870789	821598	326756	402041	259446	264624	298970	348472	280386	245745	799458	935369	768605	1.11785e+06	884177	237874	316316	303602	304862
GD1 d48:6_9.34	GD1 d48:6	9.34	C96 H162 N4 O39	2.66	1995.09	666.036	[M+3H]+3	22557.9	27142.8	23192.5	23300.7	35126.1	27674.1	29758	22467.1	30917.8	30301.6	30330.8	24857.9	28351.4	25055.1	22644.1	26846.1	22402.9	23706.4	41629.9	34654.9	33056	24992.8	39158.6	37334.2	37879	25322.5	24613.4	26381.6	23294	23028.8	27877.5	23153.6	29103.1	38355.6	42967.7	35264.6	43287.9	35200.4	22857.1	30228.7	24639.5	28786.2
GD1 d50:6_11.96	GD1 d50:6	11.96	C98 H166 N4 O39	-5.87	2023.1	675.374	[M+3H]+3	286083	264137	226693	157646	323260	396421	271111	273724	338924	296168	375663	255673	271165	295961	270979	282152	223038	254984	153281	222044	138917	251559	150369	137638	173926	268106	302951	315752	290283	302273	299018	274437	302578	692749	140344	162800	347056	134639	258055	292365	293876	373285
GD1 t30:6_29.73	GD1 t30:6	29.73	C78 H126 N4 O40	1.47	1758.8	880.406	[M+2H]+2	500375	400113	731792	658260	1.2967e+06	610470	508352	415715	814224	943459	1.33532e+06	318438	379400	410921	650098	893492	523484	593128	329351	914589	404099	374231	357356	574074	689191	559251	390868	1.4912e+06	584346	369280	870629	397899	350591	1.27732e+06	716631	417637	1.27529e+06	528321	447966	1.14988e+06	387799	369275
GD1 t32:6_22.39	GD1 t32:6	22.39	C80 H130 N4 O40	1.71	1786.83	894.422	[M+2H]+2	178027	187931	187688	172668	526807	236963	158701	246538	282856	345760	639437	138058	143741	180178	286572	234532	188647	179708	174156	347601	201815	159233	186984	210412	433239	188867	184888	383983	196469	160520	245416	152642	165141	283012	182097	183501	183816	195355	150465	240127	188502	160940
GD1 t34:4_14.53	GD1 t34:4	14.53	C82 H138 N4 O40	8.41	1818.9	910.459	[M+2H]+2	54724.9	54827.1	77491.6	58535.7	63597.3	73585.8	92571.8	51674.7	67940.3	67848.7	69600.6	63418.7	71088.7	76564.6	74170.7	73943.1	73233.1	54190.5	114926	72333	77101.5	62115.3	47541.8	61631.8	56192.2	86874.8	76909.1	75121.1	105948	65878.5	96522.6	60803.7	63208.8	220568	55298.6	58935.6	51540.4	45855.7	58274.7	76671.4	62596.9	68786.7
GD1 t34:5_24.68	GD1 t34:5	24.68	C82 H136 N4 O40	-9.64	1816.86	909.435	[M+2H]+2	384407	306465	503640	328819	1.26534e+06	386548	217066	460947	915113	1.07711e+06	1.28663e+06	237589	304516	345624	459854	870031	349213	318775	233590	1.42899e+06	266646	271854	231656	318992	504910	439659	290474	1.41834e+06	514699	234972	953892	239791	253796	485120	364293	926292	288959	491557	265398	661422	394288	296485
GD1 t35:0_23.74	GD1 t35:0	23.74	C83 H148 N4 O40	9.54	1840.98	1841.99	[M+H]+1	895841	698918	1.05918e+06	1.2936e+06	1.51543e+06	868172	948997	616156	1.60889e+06	1.61292e+06	1.49043e+06	820748	854573	597935	891833	2.03624e+06	925346	666385	763468	992988	1.02565e+06	685877	558297	1.02495e+06	1.04558e+06	848699	649551	3.50893e+06	822300	807547	557174	925806	530063	700821	756397	805247	792910	785884	571466	1.55448e+06	667280	771686
GD1 t36:0_22.84	GD1 t36:0	22.84	C84 H150 N4 O40	-1.68	1854.98	926.482	[M-2H]-2	247686	278040	191391	364586	208930	164767	200427	319418	376802	268992	231114	184384	328871	215869	239561	267244	316731	227372	417051	366280	245794	428534	325048	316995	443472	416880	290891	290480	380234	239380	283648	190754	239005	296444	324944	395277	527996	461831	199982	331291	321145	368842
GD1 t36:0_23.69	GD1 t36:0	23.69	C84 H150 N4 O40	-0.59	1854.98	928.498	[M+2H]+2	162014	286500	268422	307229	373055	201554	289441	196834	347484	372615	280360	152922	231828	140253	205406	330242	195455	313583	173377	200223	192012	194914	130560	198291	338800	330123	149954	715042	204887	167576	276525	212313	212746	160290	176330	204110	181330	226198	136658	561453	202572	151483
GD1 t36:1_23.68	GD1 t36:1	23.68	C84 H148 N4 O40	-0.88	1852.97	925.475	[M-2H]-2	367837	740134	394557	724152	969673	536684	365874	452189	979489	1.04824e+06	806471	451168	370212	459100	527686	774200	581911	674194	398752	650863	500383	371928	448356	421534	745287	451135	469414	1.46368e+06	331780	384335	581759	601992	681682	353580	372479	364559	426993	505695	371051	1.10581e+06	485317	393402
GD1 t36:1_19.94	GD1 t36:1	19.94	C84 H148 N4 O40	-0.02	1852.97	925.476	[M-2H]-2	100400	139071	129007	70951.9	72793.9	37519.4	47242.8	105429	23666.4	80950.8	55384.7	56119.4	79528.4	29939	90295.2	89458.5	53985.1	87443.9	101436	42427.1	58195.6	57726.2	35010.7	104848	56585.8	109336	72068.5	74177.1	96578.8	93121.1	60352.7	47644.2	85574.8	107478	118583	78564.5	73126.6	36730.8	31671.2	41273.2	56728.2	41266.7
GD1 t36:2_21.27	GD1 t36:2	21.27	C84 H146 N4 O40	-0.2	1850.95	924.468	[M-2H]-2	89150.8	111186	48964.8	75887.7	93457.2	70983.3	60793.3	95908.2	64830.3	65928.3	100594	73043.4	94551.2	42282.6	95291.8	111818	60738.3	82007	81910.8	65446	86518.2	83840.4	46172	101956	88793.3	196553	82282.1	83712.5	90281.8	99892.6	74783.7	76762.1	22134.8	106100	118924	91719.2	85711.1	73742.7	21597.2	60391	74353.7	65533.1
GD1 t36:4_15.29	GD1 t36:4	15.29	C84 H142 N4 O40	-8.87	1846.9	924.459	[M+2H]+2	85963.6	74537.9	86644.1	69822.7	90399.3	95801.2	112510	84141.8	75233.4	69696.7	73974.6	68165.1	96095.4	76987.2	89066.3	87656.7	61803.7	91599.5	179556	87794.6	109180	72330.6	97570.3	170059	163669	91217.7	76582.1	97260.7	77395	84969.9	80709.9	70250.2	77175.8	259903	120878	111242	273070	141143	66540.3	69151.5	73054.9	86315.7
GD1 t36:4_20.73	GD1 t36:4	20.73	C84 H142 N4 O40	3.69	1846.93	924.471	[M+2H]+2	460511	418968	658077	423473	413810	305679	534332	533985	542317	679906	342107	415797	569686	338774	448223	420748	365893	432045	1.60075e+07	8.14867e+06	4.86303e+06	440455	1.03739e+07	1.84776e+07	1.24222e+07	427804	752764	1.02844e+06	579171	2.11076e+06	1.08646e+06	476738	553475	2.70318e+07	1.67579e+07	1.29694e+07	2.04588e+07	1.32322e+07	319492	501762	528565	584251
GD1 t37:3_13.76	GD1 t37:3	13.76	C85 H146 N4 O40	-8.55	1862.94	932.475	[M+2H]+2	217634	253678	281803	330407	297845	278407	244129	302738	245279	271375	340115	248897	382966	320912	251819	292119	289977	305998	306295	335524	354266	305986	349918	357307	431140	408409	344063	338612	300095	332367	251007	293239	316245	321974	380977	395379	442173	430297	313037	289766	287676	277475
GD1 t38:2_23.8	GD1 t38:2	23.8	C86 H150 N4 O40	0.94	1878.98	938.485	[M-2H]-2	728977	631479	864603	964423	1.31683e+06	921715	694862	579604	1.65572e+06	1.65279e+06	1.34855e+06	808990	617722	736480	840858	1.52915e+06	875273	620751	702660	979564	987449	563323	555646	706620	721920	570860	621836	2.51427e+06	538424	681200	502847	870537	361024	476477	641271	535983	629612	927044	693812	1.7373e+06	679030	664642
GD1 t38:3_15.27	GD1 t38:3	15.27	C86 H148 N4 O40	-4.28	1876.96	939.487	[M+2H]+2	36456.1	30127.4	43815.9	29831.5	43550.3	32800.7	35381.5	31542.4	38579.5	31910.7	32386.1	28657.5	30021.7	39478.8	37851.9	33345.9	29742.6	27718.4	39724.6	38468.5	34299.1	28232.9	40152	40656.3	40392.4	33735.3	30048.4	42628.5	32461.4	35140.8	28439.4	36024.1	35560.9	50966.9	42145.4	43517.6	44902.2	39062.1	34121.7	28820	29121.5	34191.6
GD1 t38:3_21.64	GD1 t38:3	21.64	C86 H148 N4 O40	1.03	1876.97	937.477	[M-2H]-2	205276	204507	160326	204789	236581	165235	156509	191938	162244	174412	224537	138192	178810	57847	202294	241886	174131	193337	201298	144239	162625	158610	115396	208673	186161	262102	515727	188345	167249	225754	140088	137469	79491	238605	252621	234520	197889	161600	87695.6	161464	133376	162612
GD1 t38:5_29.81	GD1 t38:5	29.81	C86 H144 N4 O40	2.19	1872.94	937.477	[M+2H]+2	266438	233096	328862	315156	346192	318494	229984	218147	282725	321918	405311	216784	224806	213632	207336	258890	250287	306423	236359	345440	233207	220983	199120	258292	318764	250910	195390	681971	249139	210666	300915	249502	218385	349004	241998	216399	328126	251777	225786	387449	255369	258781
GD1 t38:6_29.09	GD1 t38:6	29.09	C86 H142 N4 O40	0.64	1870.92	936.468	[M+2H]+2	924472	1.91041e+06	3.15273e+06	2.41003e+06	1.56261e+06	830062	3.84298e+06	1.31497e+06	2.04153e+06	1.91192e+06	1.43853e+06	1.7355e+06	2.09076e+06	1.18675e+06	1.27158e+06	1.65988e+06	2.39628e+06	1.67696e+06	1.66017e+06	1.9324e+06	1.18242e+06	2.90655e+06	1.61127e+06	1.19493e+06	1.79944e+06	3.22405e+06	1.09673e+06	2.43869e+06	1.95968e+06	1.2886e+06	2.22243e+06	588890	859255	1.15539e+06	1.50083e+06	1.94643e+06	1.63701e+06	1.20646e+06	1.40214e+06	2.99683e+06	1.79036e+06	2.3701e+06
GD1 t39:3_11.2	GD1 t39:3	11.2	C87 H150 N4 O40	-8.65	1890.97	946.49	[M+2H]+2	105078	178510	137790	92819.8	147244	118829	289815	113666	216161	168828	145768	139256	121743	141752	126239	114237	103419	131687	1.50606e+06	76961.9	962000	209404	1.36382e+06	1.913e+06	1.19081e+06	186910	131958	128265	167287	127574	137207	193206	141249	2.66082e+06	2.12881e+06	1.75115e+06	1.949e+06	1.6426e+06	119856	133905	161859	190313
GD1 t40:3_26.93	GD1 t40:3	26.93	C88 H152 N4 O40	-6.51	1904.99	1905.99	[M+H]+1	932667	1.18138e+06	2.92565e+06	1.49696e+06	1.25154e+06	848159	1.40569e+06	1.50979e+06	2.44107e+06	1.86726e+06	1.84164e+06	1.41557e+06	1.49145e+06	2.16929e+06	1.62701e+06	1.45055e+06	1.51008e+06	1.38732e+06	1.0798e+06	1.87585e+06	2.00856e+06	1.97009e+06	1.12961e+06	1.40483e+06	1.42938e+06	1.79697e+06	2.02374e+06	1.96399e+06	1.56194e+06	1.27838e+06	1.87426e+06	1.7483e+06	1.395e+06	1.43304e+06	1.76742e+06	1.63542e+06	1.98091e+06	1.55945e+06	1.73472e+06	2.63667e+06	1.87705e+06	1.74461e+06
GD1 t42:2_12.11	GD1 t42:2	12.11	C90 H158 N4 O40	1.11	1935.05	646.023	[M+3H]+3	310726	300371	266036	188401	355188	430569	320190	299164	376824	331596	408024	299139	318648	357216	298765	306457	242457	276949	643158	288765	106875	299386	284614	458736	186925	291201	863006	346443	362977	328311	312373	326405	385984	1.01218e+06	495802	619682	781325	384736	288066	319614	319191	405440
GD1 t42:2_20.13	GD1 t42:2	20.13	C90 H158 N4 O40	1.56	1935.05	966.517	[M-2H]-2	159478	140202	494198	90147.5	83861.7	62293.3	88460	137287	50621.7	56251.3	65868.7	89769.2	123837	39842.4	112824	138156	92191.8	129859	123421	68122	80717.5	110933	42378.1	167489	87770.3	138941	113163	118824	252560	130674	76132.9	89729.4	47108.7	127389	217373	153240	122748	80508.3	41950.8	65956.4	82504.8	59722
GD1 t44:5_24.38	GD1 t44:5	24.38	C92 H156 N4 O40	-7.62	1957.01	977.5	[M-2H]-2	400707	452951	633376	903448	882901	619618	464898	563106	1.14247e+06	1.20235e+06	1.16681e+06	537096	561653	809412	603618	668762	811718	538021	462977	1.43022e+06	389213	571780	663898	406346	894150	565462	458420	1.25254e+06	582301	388031	1.02761e+06	338174	510813	551741	435083	466513	430303	1.10118e+06	656542	1.18207e+06	740136	593832
GD1 t45:3_7.47	GD1 t45:3	7.47	C93 H162 N4 O40	-7.68	1975.06	988.538	[M+2H]+2	30766.5	38460.6	50340.9	32428.6	45939.6	33782.7	48611.5	35654	37570.1	45315	47449	30554.2	35008.1	34647.2	34058.9	38706.7	36221.6	34602.1	37305.3	28516.2	34517.9	38398.6	40676.7	29116.4	36178.2	30864.6	34868.5	38024.7	44295.8	32930.3	35439	37041.3	43180.5	35461.4	31812.9	32981.6	37641.2	33787.1	35331.1	40178.7	50866.7	44890.1
GD1 t48:5_11.95	GD1 t48:5	11.95	C96 H164 N4 O40	-7.18	2013.08	1007.55	[M+2H]+2	60702	58628	54275.5	35732.9	72926.7	62314.9	56658.1	60891.2	77230.8	66497.6	82342.7	59276.6	65944.4	68994.2	67909.8	61318.6	58202.6	61723.4	34083	28905.1	24351.1	60510.4	31587	30222.1	29941.1	59885.6	69729.6	67282.1	70317.9	67806.7	65177.7	64714.1	68508.9	32576.6	32658.7	31056.9	32607.5	30208.5	56171	69966.3	66730.8	84880.7
GD2 d34:5_23.01	GD2 d34:5	23.01	C76 H126 N4 O34	1.16	1638.83	820.421	[M+2H]+2	413618	648105	492572	735256	777713	392250	413332	929864	741669	809156	881638	372079	440890	316735	588207	677109	510675	478205	657541	499923	380611	386066	658056	465621	710098	586261	369772	1.16075e+06	638226	309464	542582	438801	893989	613562	289441	431371	535309	495023	310326	675348	589149	602586
GD2 d34:5_16.1	GD2 d34:5	16.1	C76 H126 N4 O34	5.3	1638.83	1639.84	[M+H]+1	75903	82058.2	68016.6	71321.7	71332.4	79511.4	67304.6	71306.4	64168	81089.5	75588	68998.5	81812.2	61807.1	79766.1	88870.2	56044.9	97243.9	115370	97043.2	90635.1	66667.6	131133	138724	101631	109718	68236.6	88847.2	79037.3	77561	54619.6	74228	67254.3	151361	128326	293360	121385	122140	56567.2	73283.2	82129	60463.9
GD2 d35:4_16.06	GD2 d35:4	16.06	C77 H130 N4 O34	2.6	1654.86	828.438	[M+2H]+2	425191	442028	436697	323881	562360	458706	305638	344002	291395	446274	382995	313330	479548	287071	499418	587890	270220	775031	2.37141e+07	9.5552e+06	8.17347e+06	393079	1.25908e+07	2.64466e+07	1.1177e+07	561730	312062	473922	449436	430614	291088	337078	317095	1.85548e+07	2.50609e+07	2.43648e+07	3.24693e+07	1.59487e+07	310642	397233	387387	280815
GD2 d36:0_23.9	GD2 d36:0	23.9	C78 H140 N4 O34	-6.48	1676.92	1675.92	[M-H]-1	671705	551841	796677	919060	1.21337e+06	849301	640271	522384	1.52564e+06	1.52294e+06	1.2426e+06	745433	569191	678619	774797	1.40901e+06	806508	571983	647456	902606	909871	519066	511992	651105	665203	526721	572982	2.31674e+06	496123	627682	470517	815187	364300	439043	590890	493874	580148	738653	639304	1.74241e+06	665454	612425
GD2 d36:2_9.09	GD2 d36:2	9.09	C78 H136 N4 O34	6.46	1672.91	837.464	[M+2H]+2	80209.7	87191.5	103525	94632.7	106598	101063	100342	62994.6	99459.3	85747.7	94982.6	73843.3	80307.2	74078.2	107918	102939	80550.8	79517.3	133110	102564	138202	74288.1	122528	102894	134657	94576.1	104463	131944	97524.3	95206	131849	92284.5	86906.4	171652	117780	122192	120319	147932	75573.5	99524.7	79792.5	104191
GD2 d36:4_9.44	GD2 d36:4	9.44	C78 H132 N4 O34	0.8	1668.87	835.444	[M+2H]+2	36238.6	59423.4	55096	53147	68670.3	48871	53425.5	44556	81142.3	92062	68639.6	42636.4	45792.5	44212.8	47872.4	64994.1	54794.5	48831.1	71474.6	98834.4	100065	51437.3	67722.2	65077.2	76558.3	63243.3	43125.6	60842	39399.7	42398.6	45107.4	43341.3	51899.4	164169	83827	82298.6	194697	107595	39889.8	81054.4	47659.4	55830.2
GD2 d37:1_25.12	GD2 d37:1	25.12	C79 H140 N4 O34	0.93	1688.94	843.461	[M-2H]-2	2.13465e+06	1.87699e+06	2.87966e+06	2.96602e+06	2.86537e+06	3.19485e+06	1.33232e+06	1.41356e+06	4.62682e+06	4.01952e+06	4.21844e+06	2.77445e+06	1.79629e+06	3.52989e+06	3.12012e+06	2.18423e+06	3.63721e+06	2.19146e+06	2.93926e+06	4.25623e+06	2.7259e+06	2.1864e+06	3.28757e+06	1.5536e+06	2.61392e+06	1.80806e+06	1.71781e+06	3.28755e+06	2.45187e+06	1.1742e+06	3.28578e+06	1.47055e+06	2.25877e+06	2.73303e+06	1.26877e+06	2.71744e+06	2.30591e+06	3.92632e+06	1.95037e+06	3.42172e+06	2.50816e+06	2.40514e+06
GD2 d38:1_25.1	GD2 d38:1	25.1	C80 H142 N4 O34	1.47	1702.95	1703.96	[M+H]+1	2.22428e+06	2.62556e+06	3.1611e+06	2.96369e+06	3.16463e+06	2.93765e+06	1.52327e+06	1.33773e+06	5.0552e+06	5.8659e+06	4.82227e+06	1.94863e+06	1.22989e+06	2.10571e+06	4.24802e+06	3.02568e+06	3.39454e+06	2.31763e+06	2.4508e+06	3.44661e+06	2.40446e+06	1.60193e+06	2.77641e+06	2.49976e+06	2.01701e+06	3.3901e+06	1.48848e+06	5.14774e+06	3.19973e+06	1.07857e+06	3.90964e+06	1.17215e+06	1.75595e+06	4.26719e+06	1.32683e+06	3.02576e+06	1.61499e+06	3.39125e+06	1.30279e+06	3.1592e+06	2.50207e+06	3.32424e+06
GD2 d39:3_29.01	GD2 d39:3	29.01	C81 H140 N4 O34	-1.36	1712.93	1711.93	[M-H]-1	275873	178932	289015	209042	192849	332534	242386	160946	396035	250075	316489	154302	250529	263343	200335	249816	308750	191032	225076	351568	287242	340619	173856	159619	188435	154146	183383	270968	321605	135643	218654	167157	205506	200950	174089	434884	334479	353516	298579	260869	291526	202127
GD2 d40:1_29.09	GD2 d40:1	29.09	C82 H146 N4 O34	7.71	1731	1732	[M+H]+1	620285	1.44372e+06	2.15487e+06	1.82129e+06	1.18089e+06	602913	2.90419e+06	993742	1.54281e+06	1.44486e+06	963974	1.31154e+06	1.58002e+06	896845	960946	1.25439e+06	1.8109e+06	1.0809e+06	1.25461e+06	1.23818e+06	887185	2.19652e+06	1.21766e+06	701854	1.16721e+06	2.28179e+06	828809	1.61338e+06	1.37786e+06	922206	1.67952e+06	435213	628426	839718	1.10413e+06	1.19246e+06	1.11374e+06	911733	997157	2.26474e+06	1.23912e+06	1.79112e+06
GD2 d40:4_26.22	GD2 d40:4	26.22	C82 H140 N4 O34	-1.44	1724.93	863.474	[M+2H]+2	1.16643e+06	1.81002e+06	3.12573e+06	4.77528e+06	3.00615e+06	1.839e+06	1.36735e+06	1.70996e+06	4.0162e+06	4.01227e+06	3.30885e+06	1.10828e+06	1.7561e+06	1.74956e+06	2.4396e+06	2.97418e+06	3.05396e+06	2.70397e+06	2.08135e+06	2.52602e+06	1.23361e+06	1.03857e+06	1.79568e+06	1.62651e+06	2.06584e+06	2.69652e+06	1.26256e+06	4.38119e+06	1.6002e+06	1.81562e+06	2.4323e+06	1.38182e+06	1.55434e+06	1.26679e+06	1.28878e+06	1.46372e+06	2.0437e+06	2.15254e+06	1.5738e+06	3.51145e+06	1.42774e+06	1.43784e+06
GD2 d42:2_28.2	GD2 d42:2	28.2	C84 H148 N4 O34	1.02	1757	877.492	[M-2H]-2	202669	178679	283277	514138	246797	311563	168404	182837	513837	345041	377177	200285	201863	353238	249207	264972	419400	207002	201028	473327	185144	235582	272378	145680	295306	207948	173398	342998	220218	177446	263497	175319	237687	157476	145682	213540	260049	615532	290371	489904	261669	217280
GD2 d42:4_10.92	GD2 d42:4	10.92	C84 H144 N4 O34	-3.67	1752.96	1753.97	[M+H]+1	115339	130041	150738	87198.5	146031	124922	228565	124595	152232	152514	133303	121309	120297	135117	113293	215032	112502	83210.5	133998	138486	93840.7	122843	123361	125524	131577	140666	182748	130623	109145	164485	101166	167819	149489	149333	159974	125427	115907	129911	114254	114809	122191	135770
GD2 d43:2_24.54	GD2 d43:2	24.54	C85 H150 N4 O34	-3.1	1771.01	886.511	[M+2H]+2	1.14141e+07	1.40319e+07	2.28376e+07	1.17501e+07	3.00918e+07	1.8636e+07	1.10274e+07	1.73402e+07	3.24686e+07	3.90237e+07	3.89607e+07	7.96458e+06	1.34007e+07	1.75113e+07	2.28546e+07	2.33435e+07	1.78387e+07	1.32893e+07	7.32718e+06	3.65743e+07	7.56126e+06	1.37272e+07	9.24893e+06	7.19386e+06	1.9121e+07	1.95697e+07	9.79354e+06	3.73129e+07	1.45834e+07	1.13802e+07	3.38007e+07	3.01927e+06	6.67062e+06	1.57742e+07	1.43837e+07	1.20417e+07	7.33194e+06	1.89555e+07	1.26704e+07	2.78055e+07	1.751e+07	1.02649e+07
GD2 d45:1_8.3	GD2 d45:1	8.3	C87 H156 N4 O34	-8.66	1801.04	601.355	[M+3H]+3	117356	131755	113710	119639	145015	157050	244509	126160	134279	113261	121314	152559	179842	113460	99717.9	97265.1	110067	90028.4	179619	145822	220809	172429	217600	205491	239725	146133	160921	132989	115254	128746	130195	142952	143460	194775	239881	204740	281967	248834	153135	146951	146632	135145
GD2 t31:1_32.57	GD2 t31:1	32.57	C73 H128 N4 O35	-0.56	1620.84	1621.84	[M+H]+1	190347	176285	260942	292808	256585	284289	219125	174895	229183	353331	313255	141708	147299	134307	156234	273837	171041	186760	140646	318109	137853	174364	122316	167462	220173	204748	131820	512861	288490	126677	306595	155408	187920	159268	153171	199297	183864	216870	154051	426295	151596	191233
GD2 t35:4_7.92	GD2 t35:4	7.92	C77 H130 N4 O35	0.53	1670.85	836.433	[M+2H]+2	8.40561e+06	9.03604e+06	7.7517e+06	4.69825e+06	9.99165e+06	9.38688e+06	1.00827e+07	8.76614e+06	8.4279e+06	8.91719e+06	9.0254e+06	9.23851e+06	8.57695e+06	8.11195e+06	9.64126e+06	8.68852e+06	7.67928e+06	6.20015e+06	6.57878e+06	6.88063e+06	8.39127e+06	6.4081e+06	7.07283e+06	8.69754e+06	8.27416e+06	1.08371e+07	7.99503e+06	1.19373e+07	7.65087e+06	8.56776e+06	1.18857e+07	7.77452e+06	7.21742e+06	1.34979e+07	8.26114e+06	9.00552e+06	8.33639e+06	8.24616e+06	8.44056e+06	8.9685e+06	7.48193e+06	1.0795e+07
GD2 t39:0_24.74	GD2 t39:0	24.74	C81 H146 N4 O35	-2.59	1734.97	868.493	[M+2H]+2	2.72849e+06	3.36197e+06	2.38631e+06	2.1429e+06	4.26128e+06	2.22642e+06	2.68074e+06	2.22386e+06	2.82997e+06	4.82998e+06	4.55445e+06	1.73581e+06	3.09218e+06	4.63234e+06	1.99818e+06	3.94818e+06	2.625e+06	3.32739e+06	2.23275e+06	4.17715e+06	1.6527e+06	3.37476e+06	3.2741e+06	3.43102e+06	2.07212e+06	2.47243e+06	2.50814e+06	3.44731e+06	3.75556e+06	3.75354e+06	3.07093e+06	2.37447e+06	3.28293e+06	1.76229e+06	3.22897e+06	3.04153e+06	3.03358e+06	1.99512e+06	3.42607e+06	3.84041e+06	3.46686e+06	2.81063e+06
GD2 t41:3_13.07	GD2 t41:3	13.07	C83 H144 N4 O35	-8.17	1756.95	879.481	[M+2H]+2	207242	258462	315559	269607	321426	813773	612362	341874	389550	335065	381965	175608	270492	291488	288774	276784	234166	274578	7.15847e+06	3.50593e+06	3.37931e+06	297961	4.10494e+06	4.62636e+06	3.22883e+06	317122	215690	291841	284597	273003	344628	196056	244698	1.09215e+07	6.42623e+06	5.89025e+06	7.68384e+06	3.4966e+06	350507	237410	364986	313420
GD2 t42:0_29.21	GD2 t42:0	29.21	C84 H152 N4 O35	-0.04	1777.02	1776.02	[M-H]-1	149659	143976	180452	214600	222686	213317	188295	144786	262172	251582	239760	172964	158107	191833	141660	172809	208889	136051	139388	298216	174049	460955	182107	122897	177268	170204	129938	251979	220901	132637	228158	129929	192124	169344	135791	182389	162986	193919	235122	310536	235101	179843
GD2 t45:1_27.87	GD2 t45:1	27.87	C87 H156 N4 O35	-2.14	1817.05	909.533	[M+2H]+2	9.42812e+06	1.37192e+07	8.08363e+06	1.22749e+07	1.06619e+07	1.20614e+07	7.15411e+06	1.02756e+07	7.43649e+06	7.13119e+06	9.37748e+06	8.5246e+06	5.6466e+06	9.66449e+06	9.14179e+06	7.05528e+06	1.36237e+07	1.1476e+07	1.39356e+07	1.19876e+07	1.43028e+07	9.06596e+06	8.65285e+06	1.03752e+07	9.78064e+06	5.31977e+06	9.18674e+06	1.05116e+07	1.28232e+07	1.1207e+07	1.1241e+07	8.96235e+06	8.20219e+06	8.20367e+06	1.22718e+07	7.35019e+06	1.01337e+07	7.45079e+06	1.16751e+07	7.80697e+06	1.08531e+07	1.04596e+07
GD2 t45:3_24.53	GD2 t45:3	24.53	C87 H152 N4 O35	-6.56	1813.01	907.513	[M+2H]+2	4.74416e+06	4.96369e+06	7.89514e+06	4.12502e+06	3.51816e+06	7.53577e+06	5.94642e+06	6.0459e+06	9.6218e+06	3.72866e+06	6.55376e+06	4.38828e+06	5.30378e+06	5.91698e+06	5.511e+06	7.8984e+06	5.67002e+06	4.46855e+06	3.94265e+06	6.46419e+06	3.19492e+06	5.22341e+06	3.41144e+06	3.75819e+06	4.5847e+06	6.93422e+06	4.40533e+06	4.27889e+06	4.69142e+06	5.27957e+06	5.73301e+06	1.90677e+06	3.21556e+06	6.69089e+06	5.08093e+06	3.89486e+06	4.22158e+06	1.08894e+07	5.34458e+06	6.20564e+06	5.49445e+06	4.55951e+06
GD2 t47:1_8.18	GD2 t47:1	8.18	C89 H160 N4 O35	-8.3	1845.07	616.031	[M+3H]+3	103793	107093	110677	91346.7	173638	314711	239380	111155	114752	115299	125933	144673	125585	116872	94076.8	119636	101154	103554	177148	226282	209223	139272	226140	153079	208654	114750	188685	108982	118573	105977	118891	112228	114263	183747	181767	187726	238254	191877	105225	107525	109024	114497
GD3 d33:1_28.6	GD3 d33:1	28.6	C67 H119 N3 O29	-8.11	1429.78	1428.77	[M-H]-1	199368	141540	186961	233327	252832	284187	161024	142109	333136	269955	363207	170754	147104	276935	183495	255299	244934	154914	159004	371477	197028	208639	222762	139841	275770	160210	176524	320619	205981	180291	332296	336976	192394	188830	143836	218997	213377	306997	233120	293093	226896	215299
GD3 d34:2_19.94	GD3 d34:2	19.94	C68 H119 N3 O29	2.08	1441.8	719.891	[M-2H]-2	84465.9	83305.5	90145.6	59691.2	61240.8	31564.7	39744.9	85738.9	19910.3	68103.1	51101.2	47212.7	66906.5	25187.4	74504.8	75260.6	34908	73565.7	58650.1	29678.4	45608.8	48564.5	29454.2	88207.7	47605.1	91983.7	60630.5	62404.4	81250.8	78341.9	41365.7	36709.2	67027.1	90420.4	99763.1	66095.6	61520.7	30901.3	26644.7	34722.7	47724.9	32562.9
GD3 d36:2_26.49	GD3 d36:2	26.49	C70 H123 N3 O29	3.69	1469.83	1468.82	[M-H]-1	233997	140946	263880	283504	364121	344493	183865	156092	481189	379032	603397	206079	149737	324783	231368	285906	264163	201194	209269	532101	209049	225171	247573	163086	284559	186337	199794	540914	257185	130533	305785	197422	196041	223898	143592	278907	272668	400967	254116	368199	279579	234368
GD3 d37:1_32.17	GD3 d37:1	32.17	C71 H127 N3 O29	-8.78	1485.84	1484.84	[M-H]-1	495398	336344	422237	290060	211296	245891	305526	403817	468838	232555	327880	240989	433262	605457	272242	318724	486763	383682	446223	777314	442104	463111	347997	360185	426852	284978	378036	446533	386626	526598	328383	440170	390722	283619	478431	537798	524837	524330	502802	348272	568000	421175
GD3 d37:1_23	GD3 d37:1	23	C71 H127 N3 O29	4.43	1485.86	1486.87	[M+H]+1	555578	870545	758034	987608	1.04464e+06	832016	555194	1.24901e+06	1.03438e+06	1.08687e+06	1.18423e+06	552611	592210	425444	791933	909503	724141	648469	883220	557586	763563	518570	883912	625429	1.49089e+06	787475	569890	1.55913e+06	857275	464145	811573	640798	1.20082e+06	789633	449727	722121	632610	680603	567656	1.0351e+06	791355	809403
GD3 d38:4_24.84	GD3 d38:4	24.84	C72 H123 N3 O29	-2.39	1493.82	747.918	[M+2H]+2	576007	751408	1.11301e+06	871526	2.08386e+06	1.15093e+06	404568	659431	1.11822e+06	1.48997e+06	1.97545e+06	273201	583553	695277	823033	1.4374e+06	619942	637700	417435	1.51455e+06	634737	421938	403459	638597	761541	846760	673837	1.72864e+06	1.12005e+06	457045	1.25608e+06	558834	542684	938102	628671	555367	568636	771291	540210	884769	628250	478075
GD3 d40:1_29.48	GD3 d40:1	29.48	C74 H133 N3 O29	-2.67	1527.9	1526.89	[M-H]-1	285776	349026	381985	632796	480499	512534	294773	237990	625881	604794	553235	362459	271914	419376	314394	384575	538050	334116	305334	681416	321160	243592	413767	260320	562495	348806	304877	567799	535566	295019	490687	320462	373753	448505	312736	315413	298590	471498	503165	746050	479200	342040
GD3 d40:2_27.79	GD3 d40:2	27.79	C74 H131 N3 O29	-6.52	1525.88	1526.88	[M+H]+1	4.07273e+06	4.34531e+06	5.85438e+06	3.89981e+06	6.40087e+06	4.32523e+06	4.45904e+06	3.57205e+06	6.2833e+06	6.07063e+06	5.9281e+06	3.22334e+06	3.77613e+06	3.93231e+06	5.28138e+06	5.93225e+06	5.08247e+06	4.55074e+06	3.91307e+06	5.49782e+06	3.62232e+06	3.1817e+06	3.12005e+06	4.2118e+06	4.22653e+06	4.48383e+06	3.94252e+06	7.09515e+06	3.94657e+06	3.91382e+06	4.17454e+06	4.28841e+06	3.0008e+06	3.06112e+06	4.26668e+06	3.46331e+06	4.43562e+06	3.87842e+06	3.89559e+06	5.74787e+06	3.86605e+06	3.45625e+06
GD3 d40:4_25.55	GD3 d40:4	25.55	C74 H127 N3 O29	-1.37	1521.85	1522.86	[M+H]+1	1.05022e+07	1.07103e+07	1.15391e+07	1.27143e+07	1.5097e+07	1.10052e+07	8.27736e+06	7.45181e+06	1.42492e+07	1.44451e+07	1.43727e+07	7.72517e+06	8.03693e+06	9.70722e+06	9.58693e+06	1.2285e+07	9.80914e+06	1.03123e+07	1.14379e+07	1.29069e+07	1.00389e+07	8.46041e+06	8.09772e+06	8.23952e+06	9.1567e+06	1.04259e+07	8.43265e+06	1.63764e+07	1.25241e+07	9.4401e+06	1.0004e+07	9.29679e+06	7.73426e+06	8.59581e+06	9.7255e+06	8.32332e+06	8.13707e+06	8.95665e+06	1.09361e+07	1.29177e+07	1.02659e+07	8.57753e+06
GD3 d42:2_29.24	GD3 d42:2	29.24	C76 H135 N3 O29	-0.21	1553.92	1552.91	[M-H]-1	37261.7	30634.2	40702.6	48378.9	44842.2	32590	33879.1	28940.1	51607.8	54936.4	49814.9	38396.6	38971.2	40633.6	32302.1	35470.2	48746.6	32614.2	28705.2	55911.1	30996.8	44577.8	38599.8	26562.1	41596.6	40882.9	28598.4	52246.3	48323.5	28949.7	49748.4	27438.2	35983.2	34928.9	33216.3	37835.2	35801.4	45812.6	50386.5	77361.2	54460.9	38815.5
GD3 d43:2_5.09	GD3 d43:2	5.09	C77 H137 N3 O29	-7.3	1567.92	784.968	[M+2H]+2	161323	179389	204502	184382	215945	212111	155982	173001	255552	216484	207023	155781	164213	184227	160648	196654	180371	142708	65476.6	121492	57249.6	198898	67781.9	62050.8	70670.9	153014	188990	196488	224970	171399	187461	160443	168293	56051.2	53908.3	53675.9	58022.9	53344.9	151676	208353	186343	190534
GD3 d44:4_27.99	GD3 d44:4	27.99	C78 H135 N3 O29	7.07	1577.93	1576.92	[M-H]-1	1.82067e+06	1.37625e+06	1.62223e+06	2.49862e+06	2.31321e+06	3.3716e+06	1.99375e+06	1.3525e+06	3.17424e+06	2.75111e+06	2.3049e+06	1.8531e+06	1.48331e+06	3.68554e+06	1.70564e+06	2.02192e+06	2.47868e+06	1.3771e+06	1.76238e+06	3.80708e+06	2.4281e+06	1.74914e+06	2.15797e+06	1.23524e+06	2.1298e+06	1.30093e+06	1.82357e+06	2.65754e+06	1.57992e+06	1.58049e+06	2.12946e+06	1.9256e+06	1.97872e+06	1.43328e+06	1.58805e+06	1.57428e+06	2.21649e+06	3.08483e+06	2.98671e+06	2.49627e+06	1.87823e+06	1.60091e+06
GD3 d47:3_6.47	GD3 d47:3	6.47	C81 H143 N3 O29	7.02	1621.99	1623	[M+H]+1	57618.4	57448.2	71507.8	58641.2	130431	89576.8	63014.5	60508.4	85228.2	122786	117455	54788.9	54230.3	61035.9	71320.1	87507.6	57060.9	53746	57832	82710.9	66875.4	64485	52358.1	104311	58848.6	56729.2	53214.9	105946	63996.1	55530.3	72684.2	60049.6	56060.8	77675.7	56051.8	59078.5	58079	53156.4	56845.4	80432.8	67016.3	63529.4
GD3 t30:1_20.8	GD3 t30:1	20.8	C64 H113 N3 O30	-8.83	1403.73	702.872	[M+2H]+2	59081.2	57274.1	97959.2	60191.6	51594.1	48634.2	63198.4	54760.4	81131.9	82704.6	47623.8	59800.7	56745.1	47581.7	66017.6	51653.5	52433.2	60693.7	79879.7	79757.3	60265.5	60129	59469.1	71989.5	70062.1	70269.4	60111.7	168927	60122.9	346706	57892.7	61849.2	61719.9	83702.2	57993.9	60147.8	96553.3	73615	39168.2	48982.9	56538.6	53268.1
GD3 t30:1_17.07	GD3 t30:1	17.07	C64 H113 N3 O30	-8.75	1403.73	702.872	[M+2H]+2	160839	375137	162649	158666	99361.7	145221	253858	346413	324278	515282	124316	216435	220549	224965	300187	283850	176058	184603	242762	171681	162761	103482	229184	176696	106243	318436	434023	365792	149654	194284	107079	331242	467461	174955	106664	122873	121483	166826	232038	272511	174560	452434
GD3 t32:0_5.4	GD3 t32:0	5.4	C66 H119 N3 O30	-1.55	1433.79	717.9	[M+2H]+2	156339	183376	190813	184996	184140	188045	173808	167401	237746	211792	196836	166429	182301	183609	163143	174668	166054	145485	64844.5	71934.1	72475.6	210375	59192	79750.6	123414	143940	151545	183894	197150	189642	193122	170149	182125	72943.2	68632.7	53144.7	72416.7	53588.1	166876	183135	190843	198489
GD3 t35:0_23.31	GD3 t35:0	23.31	C69 H125 N3 O30	-2.33	1475.83	1476.84	[M+H]+1	463599	760909	1.26115e+06	1.05548e+06	677114	694724	810601	1.12115e+06	898922	1.67717e+06	1.07734e+06	327951	1.10024e+06	441255	608218	981511	791279	952368	732358	728233	513333	553017	445158	711187	855229	1.22491e+06	392530	1.66023e+06	996781	472103	942119	800333	436846	719877	518084	832670	613399	980769	438700	929641	671149	810005
GD3 t36:4_28.62	GD3 t36:4	28.62	C70 H119 N3 O30	-5.71	1481.78	1480.77	[M-H]-1	179151	135989	168003	213392	227194	255369	144695	131797	282835	242580	326377	153439	132187	248852	153142	229411	220097	135525	146825	333808	177048	187482	183913	125661	247805	158339	158624	288107	212650	162008	298600	302805	178555	169682	174261	196790	191740	275866	209481	263372	203888	193467
GD3 t38:4_11.34	GD3 t38:4	11.34	C72 H123 N3 O30	3.35	1509.82	755.919	[M+2H]+2	340180	413581	383607	256810	450742	306499	800070	328053	727024	438212	581121	415838	443775	388954	342831	366408	374022	348364	830388	705631	442409	568430	473124	677031	604432	433042	399610	362586	423707	368587	402523	479966	414068	801086	774073	823947	1.23418e+06	907638	395790	380159	454303	583757
GD3 t39:2_24.96	GD3 t39:2	24.96	C73 H129 N3 O30	0.54	1527.87	764.941	[M+2H]+2	1.20352e+06	1.31791e+06	1.87869e+06	1.38525e+06	3.2371e+06	2.1051e+06	1.02124e+06	778431	1.85193e+06	3.42057e+06	2.66004e+06	749434	800105	832216	1.30026e+06	1.85116e+06	1.0848e+06	1.18938e+06	963130	1.8807e+06	838215	780129	777127	1.20008e+06	1.10525e+06	1.65231e+06	682567	2.97e+06	1.52703e+06	478348	1.86488e+06	725427	971154	1.95987e+06	933885	1.44159e+06	814205	1.36521e+06	598285	1.64948e+06	647027	939897
GD3 t40:2_26.1	GD3 t40:2	26.1	C74 H131 N3 O30	-2.2	1541.88	1542.89	[M+H]+1	671805	1.01816e+06	2.28226e+06	2.50504e+06	1.17655e+06	1.00726e+06	752694	952100	2.07185e+06	2.10085e+06	1.98211e+06	520862	851385	1.20139e+06	1.51898e+06	1.64697e+06	1.62379e+06	1.31615e+06	961030	1.15903e+06	690079	658630	1.29535e+06	849184	1.24505e+06	1.56229e+06	709656	2.18357e+06	891282	709133	1.43621e+06	691854	1.00956e+06	675825	683382	671858	1.01541e+06	1.15663e+06	669412	1.458e+06	699688	797218
GD3 t41:3_27.97	GD3 t41:3	27.97	C75 H131 N3 O30	1.43	1553.88	1554.89	[M+H]+1	3.51357e+06	3.89478e+06	4.59102e+06	3.0396e+06	6.93508e+06	3.83323e+06	4.24003e+06	1.96806e+06	5.43791e+06	6.46103e+06	4.65345e+06	2.41915e+06	2.4675e+06	2.74909e+06	3.5901e+06	4.35705e+06	3.53365e+06	3.47529e+06	2.35177e+06	3.74363e+06	2.53681e+06	2.44878e+06	1.71269e+06	2.54898e+06	3.6198e+06	4.14545e+06	2.48662e+06	7.17103e+06	2.28222e+06	2.71488e+06	3.30408e+06	2.75751e+06	1.72303e+06	2.14669e+06	2.78602e+06	1.97862e+06	3.95021e+06	2.70935e+06	2.12394e+06	5.37778e+06	2.31271e+06	2.77422e+06
GD3 t41:4_11.45	GD3 t41:4	11.45	C75 H129 N3 O30	-8.64	1551.85	776.934	[M+2H]+2	206421	214091	186165	147745	229863	185983	417040	199062	266098	238089	352623	252330	253474	233210	205442	207710	162337	219715	7.23286e+06	3.86674e+06	3.5894e+06	251745	6.19431e+06	5.44966e+06	4.53316e+06	237803	242483	228613	233320	223658	236263	274445	251256	1.26888e+07	7.52289e+06	7.55305e+06	7.94196e+06	6.45838e+06	227125	230680	236364	354223
Gg4 d30:3_9.84	Gg4 d30:3	9.84	C56 H98 N2 O23	-1.35	1166.65	1167.66	[M+H]+1	73194.4	83391.5	110761	81938.4	280455	230164	259605	86200.5	119384	195165	168804	62121.9	69727.4	67373.8	127218	124459	90943	75205.9	805757	513622	452306	89116.7	837801	947225	649961	208585	89430.6	198082	82401.3	80033	92234.5	104796	89277.8	1.62539e+06	919482	823324	1.0387e+06	690940	61427.2	107545	73032.1	88257.6
Gg4 d31:2_9.8	Gg4 d31:2	9.8	C57 H102 N2 O23	-6.45	1182.68	592.347	[M+2H]+2	285812	355697	616965	412388	1.47046e+06	1.63053e+06	725077	323814	1.52134e+06	1.22654e+06	1.43362e+06	238648	315701	206149	867437	848817	324233	279803	5.27658e+06	3.17224e+06	2.63462e+06	332652	4.32107e+06	5.14812e+06	4.04662e+06	623871	199890	1.06695e+06	282960	282697	410100	262733	199238	8.54073e+06	5.72585e+06	4.99544e+06	6.95865e+06	4.83833e+06	227183	611432	295658	322087
Gg4 d33:1_24.06	Gg4 d33:1	24.06	C59 H108 N2 O23	-7.59	1212.73	1213.73	[M+H]+1	880926	1.13029e+06	1.30218e+06	2.22396e+06	2.20245e+06	1.1233e+06	1.55268e+06	551629	1.93266e+06	909319	2.26878e+06	721086	1.08701e+06	592076	718914	1.57074e+06	554222	446295	847254	765690	589561	729766	702720	812255	952736	612836	1.21624e+06	1.01791e+06	710276	532767	1.03024e+06	762269	633307	899112	669465	688100	763521	1.00547e+06	553255	595714	1.12059e+06	635969
Gg4 d34:1_22.88	Gg4 d34:1	22.88	C60 H110 N2 O23	0.59	1226.75	1227.76	[M+H]+1	298310	314893	360370	281306	311778	229438	176326	319158	486664	469186	444846	262593	267137	236084	306084	395984	292756	325029	366933	362249	316344	322187	338183	283468	419893	387144	298192	573829	282424	254046	367663	352280	474479	358312	251813	383648	317660	270838	236770	412649	375857	272152
Gg4 d34:4_23.03	Gg4 d34:4	23.03	C60 H104 N2 O23	-3.54	1220.7	1219.69	[M-H]-1	1.01453e+06	968091	961446	1.22348e+06	976108	723474	895504	986976	1.23238e+06	1.07699e+06	809944	855897	1.36506e+06	820861	924652	1.04412e+06	1.0237e+06	989642	1.20629e+06	1.12998e+06	905817	907488	759247	1.06181e+06	1.1412e+06	1.38223e+06	866012	1.15598e+06	1.48637e+06	848716	1.24145e+06	852852	1.31244e+06	1.12661e+06	1.03383e+06	1.11661e+06	1.3159e+06	975997	1.04396e+06	1.1656e+06	1.10122e+06	1.1291e+06
Gg4 d35:3_10.8	Gg4 d35:3	10.8	C61 H108 N2 O23	3.11	1236.74	619.376	[M+2H]+2	194899	247811	231325	299598	276007	171585	451471	293331	197501	193084	219629	188996	338431	165839	203966	226715	145731	374559	264691	296122	253146	277935	318268	237388	485751	213692	1.47893e+07	173894	165599	191372	272847	881971	200304	299836	315497	227409	281550	253899	213769	204433	233493	242106
Gg4 d35:3_33.03	Gg4 d35:3	33.03	C61 H108 N2 O23	5.04	1236.74	1237.75	[M+H]+1	227974	241108	258877	305029	167582	191119	310555	190752	255268	236030	189469	224135	223167	211709	185638	208855	202715	216871	208624	221920	204274	254865	410174	193054	277140	317698	180824	300560	329525	194598	384106	211850	228876	268572	185225	241942	248868	311826	209481	308873	341961	268137
Gg4 d36:1_23.75	Gg4 d36:1	23.75	C62 H114 N2 O23	2.38	1254.78	1255.79	[M+H]+1	772360	602580	742430	753099	1.09076e+06	591785	818188	531226	1.38712e+06	1.3906e+06	782609	606816	736780	515516	768904	1.75557e+06	797798	574531	658232	856116	884272	591337	436193	667337	692974	731715	560018	2.46262e+06	642610	696236	455944	798194	457000	604220	652136	522315	683616	677558	492695	1.25963e+06	575303	665318
Gg4 d36:3_24.87	Gg4 d36:3	24.87	C62 H110 N2 O23	-2.16	1250.75	1251.75	[M+H]+1	1.15218e+06	1.50303e+06	2.22635e+06	1.74331e+06	4.16833e+06	2.3022e+06	1.11756e+06	1.31905e+06	2.23676e+06	2.98037e+06	3.95148e+06	546482	1.16728e+06	1.39076e+06	1.64631e+06	2.87522e+06	1.24006e+06	1.27559e+06	834992	3.02953e+06	1.26966e+06	843999	807036	1.27738e+06	1.5233e+06	1.69377e+06	1.34787e+06	3.47554e+06	2.24042e+06	914223	2.57471e+06	1.11783e+06	1.08553e+06	1.87648e+06	1.25753e+06	1.1109e+06	1.13744e+06	1.54281e+06	1.08058e+06	2.13184e+06	1.25668e+06	956290
Gg4 d37:4_29.27	Gg4 d37:4	29.27	C63 H110 N2 O23	-8.88	1262.74	1261.73	[M-H]-1	140792	148984	151203	232385	211671	216203	153788	126623	288611	300171	254342	156178	138722	179292	140848	195736	227479	127794	139564	285545	161595	167695	180437	114973	198083	164103	153255	326385	234293	143040	257039	129233	194659	154095	137284	159458	163062	208848	261542	316770	225950	150459
Gg4 d38:1_26.04	Gg4 d38:1	26.04	C64 H118 N2 O23	0.39	1282.81	1283.82	[M+H]+1	1.41266e+06	2.14096e+06	3.75651e+06	4.53527e+06	2.47403e+06	1.82577e+06	1.58276e+06	1.76988e+06	4.35666e+06	4.41765e+06	4.16795e+06	1.07125e+06	1.49943e+06	1.76231e+06	2.92618e+06	3.46322e+06	3.41448e+06	2.30085e+06	2.02084e+06	2.18432e+06	1.45109e+06	1.38496e+06	2.08114e+06	1.28865e+06	1.8017e+06	3.28516e+06	1.49226e+06	4.59158e+06	1.87418e+06	1.41014e+06	3.02005e+06	1.2419e+06	2.12289e+06	1.42112e+06	1.11126e+06	1.41278e+06	2.13519e+06	2.43214e+06	1.40763e+06	2.93021e+06	1.4713e+06	1.67638e+06
Gg4 d39:0_30.31	Gg4 d39:0	30.31	C65 H122 N2 O23	2.81	1298.85	1297.84	[M-H]-1	102384	95117.2	117012	141988	107856	127976	132815	102119	161314	264020	149144	100120	113393	149012	102734	116463	165796	158327	101552	338293	112639	105877	122623	96456	172399	125195	104375	348420	182869	91873.3	167926	121412	132342	127370	111861	127221	117976	168045	125795	138832	140201	114181
Gg4 d40:2_29.42	Gg4 d40:2	29.42	C66 H120 N2 O23	-7.29	1308.82	1309.83	[M+H]+1	553873	659665	1.05322e+06	1.30072e+06	1.30108e+06	1.03529e+06	749280	608199	1.01222e+06	1.5475e+06	1.50914e+06	593441	531928	534505	888014	1.04594e+06	936361	850692	539967	1.02914e+06	505945	514144	530165	592528	792201	963960	585081	1.89467e+06	1.03807e+06	639618	1.20102e+06	518800	477719	964706	515822	839711	609197	633654	1.02844e+06	1.64896e+06	629457	714571
Gg4 d40:2_29.17	Gg4 d40:2	29.17	C66 H120 N2 O23	1.95	1308.83	1309.84	[M+H]+1	464889	1.11675e+06	1.61347e+06	1.1309e+06	733254	389506	2.05781e+06	835652	957984	1.29148e+06	675030	951331	981088	768121	596686	816102	1.25397e+06	899102	862343	906775	554851	1.3639e+06	756088	586341	844385	1.80354e+06	514637	1.14435e+06	1.20557e+06	754173	1.04287e+06	473383	403205	542166	704265	962283	809938	694634	725681	1.60773e+06	1.02093e+06	1.11217e+06
Gg4 d42:4_29.44	Gg4 d42:4	29.44	C68 H120 N2 O23	9.63	1332.84	1331.83	[M-H]-1	454986	501174	496652	1.01595e+06	794341	756565	399085	393436	1.03468e+06	999821	880577	549800	449518	650934	497387	635764	836578	454753	464010	1.08982e+06	530928	392917	659499	419886	780121	537558	504010	854519	825565	487714	790913	475108	535176	724780	461459	521429	442392	744708	706149	1.18185e+06	675311	565446
Gg4 t30:1_21.48	Gg4 t30:1	21.48	C56 H102 N2 O24	-7.13	1186.67	1187.68	[M+H]+1	659167	898498	837832	724652	832528	769891	599792	633906	697773	750589	869724	123835	796456	716953	648659	752875	569764	607986	897596	581904	661563	606020	598999	633243	954940	972747	569004	593357	694426	753641	685743	530002	633535	688849	710932	703683	505830	543517	707519	727632	704192	680108
Gg4 t39:1_29.27	Gg4 t39:1	29.27	C65 H120 N2 O24	4.05	1312.83	1313.84	[M+H]+1	162264	346737	618792	379629	155955	122517	450924	321065	386355	380884	172975	298546	271639	308492	173669	270516	393222	333728	276247	249388	196141	348074	221526	232565	312697	684161	262702	379647	419397	272268	410795	143888	109121	242275	177733	289855	274853	208071	278900	556128	311810	395932
Gg4 t40:3_27.66	Gg4 t40:3	27.66	C66 H118 N2 O24	0.99	1322.81	1323.82	[M+H]+1	3.79866e+06	3.6459e+06	3.02148e+06	3.0954e+06	3.45919e+06	3.98408e+06	3.58878e+06	3.56612e+06	4.23119e+06	3.79028e+06	3.76432e+06	3.20488e+06	3.97452e+06	3.89685e+06	3.48948e+06	3.55791e+06	3.38334e+06	3.00965e+06	3.24244e+06	3.3936e+06	3.69771e+06	3.73074e+06	3.67629e+06	3.52006e+06	3.21189e+06	3.21468e+06	3.47543e+06	3.64274e+06	3.63604e+06	3.21246e+06	3.81339e+06	3.94745e+06	4.20283e+06	3.63178e+06	3.34841e+06	3.17025e+06	4.27359e+06	4.31671e+06	3.53664e+06	4.16996e+06	3.61797e+06	3.41203e+06
Gg4 t41:4_30.07	Gg4 t41:4	30.07	C67 H118 N2 O24	-2.11	1334.8	1333.8	[M-H]-1	164463	149095	173452	216273	130160	157344	164294	148299	234129	158490	168631	188122	195361	211275	144250	151963	240901	180793	177383	238033	181693	192726	233380	155212	237591	175695	164173	149150	217412	160641	174655	194944	207807	180661	174771	183478	184051	215060	198173	231709	208100	173899
Gg4 t42:1_30.89	Gg4 t42:1	30.89	C68 H126 N2 O24	2.43	1354.87	1355.88	[M+H]+1	922227	2.05665e+06	3.37154e+06	3.73759e+06	1.30546e+06	801745	2.54687e+06	1.0361e+06	2.74648e+06	2.1249e+06	1.34289e+06	1.5127e+06	1.25049e+06	1.21515e+06	1.21065e+06	1.12555e+06	2.17285e+06	2.13851e+06	1.53079e+06	1.66703e+06	917700	1.99534e+06	1.49931e+06	870579	1.62658e+06	2.80634e+06	988187	2.01846e+06	2.00852e+06	1.46388e+06	1.93863e+06	1.0859e+06	1.4087e+06	1.15527e+06	1.23094e+06	2.09919e+06	1.79038e+06	1.33788e+06	1.13087e+06	2.42616e+06	1.6645e+06	2.01376e+06
Gg4 t43:3_26.67	Gg4 t43:3	26.67	C69 H124 N2 O24	1.35	1364.86	1365.86	[M+H]+1	1.61316e+08	1.96637e+08	1.56458e+08	1.61762e+08	1.55425e+08	1.73936e+08	1.5087e+08	1.77855e+08	1.85908e+08	1.55031e+08	1.93648e+08	2.28276e+08	1.72652e+08	1.85244e+08	1.59239e+08	1.60147e+08	1.42144e+08	1.36392e+08	1.45208e+08	1.70122e+08	2.09762e+08	1.87143e+08	1.79017e+08	1.70983e+08	2.37728e+08	1.48119e+08	1.71411e+08	1.37679e+08	1.39804e+08	1.5612e+08	1.70788e+08	1.56812e+08	1.57118e+08	1.39435e+08	1.72438e+08	1.55694e+08	1.49681e+08	1.19056e+08	1.53743e+08	1.69325e+08	1.55875e+08	1.78777e+08
Gg4 t49:4_35.59	Gg4 t49:4	35.59	C75 H134 N2 O24	9.29	1446.95	1447.95	[M+H]+1	2.1137e+06	2.09336e+06	814967	1.08163e+06	2.05055e+06	1.59678e+06	1.27403e+06	1.20716e+06	1.38017e+06	2.74391e+06	1.33879e+06	944358	2.27984e+06	2.04662e+06	2.39947e+06	2.54197e+06	1.45565e+06	1.00527e+06	2.09105e+06	2.14849e+06	1.45364e+06	1.1634e+06	1.53215e+06	1.90238e+06	1.9268e+06	752406	1.83609e+06	1.61791e+06	1.78017e+06	1.4343e+06	1.28694e+06	1.85784e+06	1.67303e+06	2.09816e+06	1.51901e+06	1.58709e+06	3.05679e+06	1.80219e+06	2.20354e+06	713888	1.46922e+06	1.36158e+06
Gg4 t50:0_26.76	Gg4 t50:0	26.76	C76 H144 N2 O24	5.01	1469.02	1468.01	[M-H]-1	296599	162694	290473	350574	297789	318805	243527	166691	576739	455956	435734	211336	234359	288270	260457	268365	433396	190818	201564	537115	210813	315819	236566	150015	297465	203420	194171	428657	245525	157579	283894	172170	193233	168085	166246	265755	275804	502231	276428	511296	283129	195551
GM1 d30:1_15.59	GM1 d30:1	15.59	C67 H119 N3 O31	3.1	1461.79	1462.79	[M+H]+1	247987	229801	301396	258310	410388	261458	280503	261245	243795	215183	379056	253747	290616	251401	356284	317982	185556	210008	255802	292219	359626	280524	285602	382431	447775	319739	302066	293791	261645	336050	245398	226840	223328	308662	268950	303316	332477	336282	266512	227619	291833	270703
GM1 d31:0_4.51	GM1 d31:0	4.51	C68 H123 N3 O31	-1.32	1477.81	739.913	[M+2H]+2	247041	259133	262596	251894	533601	333147	258030	225836	470896	392241	417993	235146	246564	266453	254132	358706	246834	184700	106746	245438	97511.3	250004	65729.6	153235	91281.2	196370	219532	589019	302765	211335	235642	248532	264506	91268.1	131993	80487.5	86206.9	75322	227850	288230	267187	337826
GM1 d33:5_14.13	GM1 d33:5	14.13	C70 H117 N3 O31	-0.63	1495.77	1496.77	[M+H]+1	31707.7	37412.7	45470.8	45959.6	24905.3	30887.4	53606.5	31735.6	39041.7	48541	32309.9	33749.4	44327.2	37756.1	33149.4	45091.8	54162.2	44863.8	39201.2	36737.4	33543.7	35581.5	33241	38423.7	43368	55253.4	40083.6	43364	39929.9	35583.8	36219.1	39347	42510.2	46913.1	42542.1	46995	39396.6	43775.8	30937.6	53171.8	28111.7	34173.3
GM1 d34:2_20.05	GM1 d34:2	20.05	C71 H125 N3 O31	-1.8	1515.83	1514.82	[M-H]-1	107136	89814.1	276961	60560.5	49572.4	35049.4	49427.8	86563.1	28932.7	35067.5	43051.9	55465.1	83192.7	39814.5	63602	92812.5	61933.8	87238.6	82913.5	45763.9	53438.9	65471.4	28469.3	112518	61117.4	93339.3	73582.5	79824.8	159378	79875	43105.1	60279.6	31647.3	81002.5	146029	80157.6	82461.1	46935.7	28182.2	38405.5	55426.1	34995.5
GM1 d35:5_25.72	GM1 d35:5	25.72	C72 H121 N3 O31	-5.46	1523.79	1524.8	[M+H]+1	4.21796e+06	4.26934e+06	4.84952e+06	4.87547e+06	7.97381e+06	5.1255e+06	5.25445e+06	3.98617e+06	6.38532e+06	7.47175e+06	8.05911e+06	2.99939e+06	5.21745e+06	4.67557e+06	4.14469e+06	5.98926e+06	3.76984e+06	4.55366e+06	3.28298e+06	5.82234e+06	5.36703e+06	2.72816e+06	3.38039e+06	4.58346e+06	5.31263e+06	5.36906e+06	3.6907e+06	9.22182e+06	4.1938e+06	3.94026e+06	4.6126e+06	5.69251e+06	2.5517e+06	3.83411e+06	5.2698e+06	2.95623e+06	3.81261e+06	3.10988e+06	3.73455e+06	7.21361e+06	4.08804e+06	3.49883e+06
GM1 d36:1_23.76	GM1 d36:1	23.76	C73 H131 N3 O31	0.61	1545.88	773.946	[M+2H]+2	1.85051e+06	1.58624e+06	2.37411e+06	1.94855e+06	3.33542e+06	1.72007e+06	2.00634e+06	1.26371e+06	2.82814e+06	3.0025e+06	2.48699e+06	1.27885e+06	1.42676e+06	1.11228e+06	1.86739e+06	3.4791e+06	1.51721e+06	1.29524e+06	1.29968e+06	1.46771e+06	1.83511e+06	1.31789e+06	857400	1.82738e+06	1.70803e+06	1.56775e+06	1.32405e+06	6.5038e+06	1.45164e+06	1.48568e+06	1.16688e+06	1.61399e+06	923110	2.45326e+06	1.42329e+06	1.31159e+06	1.19956e+06	1.40613e+06	1.07186e+06	3.95571e+06	1.22342e+06	1.20074e+06
GM1 d36:4_24.81	GM1 d36:4	24.81	C73 H125 N3 O31	-2.43	1539.83	768.906	[M-2H]-2	627745	485769	773394	1.01512e+06	1.97223e+06	970983	320389	657548	1.38902e+06	1.75706e+06	2.05586e+06	514200	548762	1.13266e+06	761683	1.32236e+06	853988	658629	520743	1.90429e+06	704782	660440	720059	511154	972347	555726	776469	1.51641e+06	954603	437161	1.36232e+06	637342	656973	785364	605248	676825	812303	1.14243e+06	867222	1.1507e+06	878032	610770
GM1 d36:4_27.8	GM1 d36:4	27.8	C73 H125 N3 O31	7.01	1539.84	1540.85	[M+H]+1	4.22599e+06	4.50883e+06	6.07469e+06	4.21781e+06	6.64175e+06	4.48799e+06	4.62684e+06	3.70647e+06	6.51975e+06	6.29907e+06	6.15118e+06	3.25685e+06	3.7221e+06	4.08029e+06	5.48012e+06	6.15549e+06	5.27373e+06	4.72199e+06	4.06032e+06	5.70471e+06	4.11833e+06	3.82158e+06	3.23746e+06	4.3703e+06	4.8033e+06	4.90611e+06	4.09088e+06	7.58373e+06	4.09509e+06	4.17421e+06	4.33164e+06	4.44979e+06	3.11373e+06	3.17631e+06	4.42724e+06	3.59364e+06	4.21859e+06	4.02437e+06	4.04219e+06	7.24627e+06	4.01153e+06	3.58631e+06
GM1 d36:5_13.57	GM1 d36:5	13.57	C73 H123 N3 O31	3.81	1537.82	769.917	[M+2H]+2	898463	1.14516e+06	1.16338e+06	1.36403e+06	1.30099e+06	1.84709e+06	1.72057e+06	1.2498e+06	1.01259e+06	1.12032e+06	1.40411e+06	1.02753e+06	1.58101e+06	1.32483e+06	1.03959e+06	1.20596e+06	2.18585e+06	1.26326e+06	2.18445e+07	1.06434e+07	1.09674e+07	1.26321e+06	1.24758e+07	1.44994e+07	1.51444e+07	1.68605e+06	1.42041e+06	1.3979e+06	1.23889e+06	1.37212e+06	1.96687e+06	1.21059e+06	1.30556e+06	3.21568e+07	1.98538e+07	2.15653e+07	2.58208e+07	1.7922e+07	1.29232e+06	1.19625e+06	1.18762e+06	1.14551e+06
GM1 d37:4_23.8	GM1 d37:4	23.8	C74 H127 N3 O31	-1.39	1553.84	1554.85	[M+H]+1	1.06063e+06	909161	990473	1.11682e+06	1.91171e+06	985865	1.14994e+06	724298	1.62096e+06	1.7209e+06	1.42543e+06	732977	765970	637505	1.0703e+06	1.99406e+06	869594	739852	744914	841223	1.0518e+06	668293	491422	1.04737e+06	835718	898561	664030	3.72325e+06	724035	851525	578201	925065	495100	807819	815764	643623	687531	805930	564221	1.83159e+06	701206	688208
GM1 d37:5_7.11	GM1 d37:5	7.11	C74 H125 N3 O31	-1.27	1551.83	776.921	[M+2H]+2	76521.3	69367.3	72933.5	66988.7	86978.4	78242.2	75524.8	65250.9	85957.4	81271.8	88743.9	70076.6	72501.8	74881.6	79100.5	83617.9	75142.9	65320.1	179641	112899	154678	78533	201853	137061	147075	60080.7	71246.3	84194.7	106680	70999.5	90395.8	72109	77773.8	552719	381996	419660	472236	144774	71513.7	77888.9	72254.2	79531
GM1 d38:3_27.78	GM1 d38:3	27.78	C75 H131 N3 O31	-0.96	1569.88	783.93	[M-2H]-2	7.57504e+06	4.47515e+06	5.44914e+06	6.93929e+06	7.7184e+06	7.55076e+06	7.47099e+06	5.87301e+06	7.79561e+06	7.78425e+06	7.53687e+06	7.62855e+06	7.56684e+06	7.51152e+06	5.95183e+06	7.20017e+06	7.35701e+06	6.08303e+06	8.14964e+06	8.07363e+06	7.81554e+06	7.76268e+06	7.8047e+06	6.21583e+06	7.55293e+06	3.81437e+06	6.53534e+06	5.39518e+06	5.66231e+06	8.00428e+06	7.73439e+06	7.35223e+06	7.43978e+06	6.59312e+06	7.53034e+06	5.8205e+06	7.82849e+06	7.63362e+06	7.315e+06	7.8398e+06	7.51059e+06	7.20673e+06
GM1 d40:0_3.91	GM1 d40:0	3.91	C77 H141 N3 O31	9.22	1603.97	802.992	[M+2H]+2	154600	183459	145193	175100	227075	188365	204668	163432	354966	238692	171462	160593	183640	166234	131129	190822	149919	102929	16910.9	41848	21799.1	178024	13397.2	14864.3	17542.8	157959	135118	153769	222716	147800	143679	183278	180131	24680.4	13697.5	14241.4	14136.4	14807	130896	179229	238317	158297
GM1 d40:4_11.17	GM1 d40:4	11.17	C77 H133 N3 O31	-4.43	1595.89	798.95	[M+2H]+2	220779	315122	292284	195673	275023	209767	528761	200653	553946	300543	266582	266957	261618	264867	223052	228949	284981	265432	5.01487e+06	3.1071e+06	2.12344e+06	433108	3.23889e+06	4.22849e+06	2.74676e+06	329950	260251	226425	322838	258515	251164	349501	268614	9.83437e+06	5.15301e+06	5.23624e+06	5.81171e+06	4.66553e+06	244317	263224	285729	392545
GM1 d41:1_30.17	GM1 d41:1	30.17	C78 H141 N3 O31	0.53	1615.96	1614.95	[M-H]-1	169691	156415	183629	266235	137797	176729	193357	165054	247866	167789	186362	207562	206823	250381	168062	167978	255035	188276	187791	253884	192354	183311	247073	164319	259431	177841	173806	160925	232293	170066	208286	188392	223835	191261	174874	192622	194850	240370	239981	226826	230192	201896
GM1 d41:2_28.06	GM1 d41:2	28.06	C78 H139 N3 O31	-0.21	1613.94	1612.93	[M-H]-1	619790	580972	702228	1.31388e+06	1.21561e+06	1.13836e+06	771757	451274	1.62672e+06	1.19254e+06	958587	871896	682536	1.19315e+06	579054	807518	990172	697411	824209	1.41617e+06	806752	967862	1.14182e+06	553625	986258	887444	771217	1.20702e+06	976909	545961	1.15689e+06	752546	802331	728296	583747	673810	1.19075e+06	1.15106e+06	1.05707e+06	1.40025e+06	996370	792133
GM1 d42:5_26.99	GM1 d42:5	26.99	C79 H135 N3 O31	-2.38	1621.9	1622.91	[M+H]+1	756930	1.03011e+06	1.41846e+06	1.36745e+06	1.0177e+06	663716	1.09978e+06	1.00907e+06	1.26565e+06	1.08935e+06	915727	886856	1.23349e+06	795682	723705	1.04724e+06	941156	979905	745793	905116	1.00034e+06	2.09469e+06	932511	844691	1.26419e+06	1.19932e+06	1.05266e+06	1.42771e+06	1.05132e+06	1.00086e+06	1.17117e+06	1.09291e+06	971511	1.1252e+06	1.17984e+06	1.22617e+06	1.06067e+06	1.03831e+06	991375	1.12729e+06	954673	1.217e+06
GM1 d43:1_6.56	GM1 d43:1	6.56	C80 H145 N3 O31	-8.03	1643.97	822.994	[M+2H]+2	48812.9	52003.8	57634.5	49602.6	128907	76573.7	57410.9	50310.6	79218.9	115035	110208	47922.1	51391.1	55195.8	65465.3	78713.8	50088.4	52963	47832.2	68136.3	53884.1	61317.1	52707.7	282935	48677.6	47577.6	50846	90169.5	59976.1	56644.2	63802.3	53864.9	47788.2	65047	48860.9	46771.8	46217.2	40267	48425.3	67490.9	53202.1	56264.6
GM1 d43:2_30	GM1 d43:2	30	C80 H143 N3 O31	-0.16	1641.97	1640.96	[M-H]-1	77214.5	72849.4	83444.2	112649	63236.4	80437.3	85903	80950.1	105255	75429.8	81262.2	89484.4	80028.8	97774.4	68574.6	72335	103645	91960.9	81429	112497	84468.7	77778.6	101333	64975.5	108299	92758.1	71859.3	70673.6	100409	76667.7	113223	85338	80537	81242.2	69133	85231.5	74308.1	88784.6	96203.8	117019	99739.7	80362.9
GM1 d44:2_30.95	GM1 d44:2	30.95	C81 H145 N3 O31	0.05	1655.99	1654.98	[M-H]-1	94995.9	106875	127074	133927	75807.7	98156.8	115935	92266.7	124503	110543	91867.2	97608.9	105575	126058	80770.5	90531.2	125222	89022.7	89332.1	113436	98117.6	112284	90622.2	92742.3	98675.2	133524	89898.8	102241	144549	90099	123998	88728.4	102712	109837	93337.3	117388	105384	111952	125605	129234	129482	108938
GM1 t30:3_8.19	GM1 t30:3	8.19	C67 H115 N3 O32	-1.19	1473.74	1474.75	[M+H]+1	43705.2	46512.7	43951.9	37443.9	62505.5	136686	82467.6	48277.1	48770.4	45432.8	46319.6	42681.7	46802.2	43153.9	40181.7	41564.4	38106.7	39876.8	62448.7	48191.6	52532.8	45737.7	60440.8	50675	57681.3	43885.8	46240	42479.5	47442.7	39576.3	51101.1	45402.2	45587.5	156311	166532	63731.3	89552.5	109143	43040.5	39803.5	44485.9	45953.1
GM1 t31:1_14.63	GM1 t31:1	14.63	C68 H121 N3 O32	-2.63	1491.79	746.902	[M+2H]+2	15879.4	15316.3	19912.6	17045.2	20915.6	17125.3	20738.9	15065.2	17305.3	19837.2	18592.6	17693.5	16538.7	16841.4	19749.4	18586.6	14687.5	17928.7	21671.7	20942.7	20552.8	17423.9	17245.9	17248.6	24790.5	23168.1	17131.8	21482	21965.5	20016	16908	19057.8	17815.6	19524.4	15962.2	137772	19354.4	24635.9	17563.9	16978.2	15383.9	14535.3
GM1 t31:3_22.38	GM1 t31:3	22.38	C68 H117 N3 O32	5.16	1487.77	1488.78	[M+H]+1	119416	123234	128993	116268	280523	153713	104628	184912	167644	218112	297124	103549	103789	116384	214939	170807	122865	115550	118473	223538	124852	107334	121487	142730	155289	132172	116011	222849	125313	95671.4	143881	100561	119246	164393	128173	119656	128057	117238	103881	142349	114618	120711
GM1 t32:0_11.34	GM1 t32:0	11.34	C69 H125 N3 O32	1.5	1507.83	754.921	[M+2H]+2	262851	319566	296406	198433	348280	236826	618199	253480	561758	338598	449021	321310	342897	300537	264899	283116	289000	269175	9.81429e+06	5.6809e+06	4.49575e+06	439215	6.9487e+06	8.95285e+06	6.9665e+06	334603	308771	280164	327391	284800	311022	370861	319943	1.5578e+07	1.18287e+07	9.34728e+06	1.12377e+07	7.94584e+06	305819	293742	351031	451058
GM1 t33:0_5.32	GM1 t33:0	5.32	C70 H127 N3 O32	0.83	1521.84	761.928	[M+2H]+2	79873.1	88082.9	90156.6	92982.9	133130	102656	83487.1	84955.8	133159	101732	105222	79942.9	98681.8	102057	79998.9	96104.6	85950.5	76803	31147.5	38784.7	27633.5	101052	30578.9	38307.5	28674.7	70622.7	78145.5	90415.4	97779.7	91093	93134	80568.2	88835.8	27286.9	29436.5	25429.4	29688.7	28959	82517.7	83608.1	91669.9	101124
GM1 t33:2_25.62	GM1 t33:2	25.62	C70 H123 N3 O32	5.66	1517.82	1518.82	[M+H]+1	5.83639e+06	5.95201e+06	6.41261e+06	5.9997e+06	8.38988e+06	6.1159e+06	4.59998e+06	4.14119e+06	7.54223e+06	8.02758e+06	7.98733e+06	4.12775e+06	4.24225e+06	5.1475e+06	5.32775e+06	6.82716e+06	5.45123e+06	5.73088e+06	6.35638e+06	7.13929e+06	5.03526e+06	4.62589e+06	4.35288e+06	4.57895e+06	5.08866e+06	5.79397e+06	4.68628e+06	9.10086e+06	6.96002e+06	5.24615e+06	5.55954e+06	4.83316e+06	4.29816e+06	4.77695e+06	5.40475e+06	4.62552e+06	4.52201e+06	4.97748e+06	6.07751e+06	7.17873e+06	5.70507e+06	4.76679e+06
GM1 t35:2_27.81	GM1 t35:2	27.81	C72 H127 N3 O32	7.73	1545.85	1546.86	[M+H]+1	2.36857e+06	2.60972e+06	3.55611e+06	2.36885e+06	3.88806e+06	2.62726e+06	2.70854e+06	2.16976e+06	3.81665e+06	3.68746e+06	3.60089e+06	1.90655e+06	2.08693e+06	2.38859e+06	2.58075e+06	3.60341e+06	3.08722e+06	2.76424e+06	2.3769e+06	3.33952e+06	2.14382e+06	1.93265e+06	1.7174e+06	2.55836e+06	2.56731e+06	2.7236e+06	2.39479e+06	4.30978e+06	2.39725e+06	2.37736e+06	2.49371e+06	2.16523e+06	1.82277e+06	1.72021e+06	2.59169e+06	1.90331e+06	2.46955e+06	2.35585e+06	2.36629e+06	3.49141e+06	2.34834e+06	1.90539e+06
GM1 t37:1_28.88	GM1 t37:1	28.88	C74 H133 N3 O32	7.86	1575.9	1574.89	[M-H]-1	215456	121996	190507	187272	171740	207801	169441	116438	270655	191096	249304	130398	153159	217630	122894	168870	226286	143239	156629	292207	282793	217553	139716	127590	139691	117530	123131	183617	213204	98179.6	141713	127571	140085	145303	123002	311843	239491	235883	226909	195588	205063	152452
GM1 t38:5_13.53	GM1 t38:5	13.53	C75 H127 N3 O32	5.43	1581.85	791.932	[M+2H]+2	672141	685324	811400	1.02221e+06	974968	1.38422e+06	1.2894e+06	880708	706228	839424	1.05224e+06	759106	1.16247e+06	927146	779074	731572	1.63808e+06	839663	1.76164e+07	1.15538e+07	8.30973e+06	897457	1.38832e+07	1.63552e+07	1.19668e+07	1.01777e+06	1.06446e+06	1.04759e+06	840673	950531	1.47398e+06	906354	817803	3.31651e+07	1.6755e+07	1.47788e+07	1.80242e+07	2.20699e+07	768865	881375	869574	710147
GM1 t40:0_4.33	GM1 t40:0	4.33	C77 H141 N3 O32	-5.36	1619.94	810.978	[M+2H]+2	286064	253030	252650	251775	476993	319178	301493	235155	461236	484353	341461	225864	263709	277297	244694	312963	253342	199190	145101	245586	145283	310430	88244.5	149222	106379	239816	190987	427423	306389	214904	246448	291794	251874	156904	114954	118126	113714	107802	228568	286166	288129	375412
GM1 t40:1_29.15	GM1 t40:1	29.15	C77 H139 N3 O32	1.2	1617.94	1616.93	[M-H]-1	128368	103867	137083	130816	116013	122824	124520	90333.6	185602	152061	147771	118482	117272	132894	95202.3	131813	154781	104243	98978.9	159998	112686	398533	114854	83458.2	116751	132449	92741.5	186728	131177	100514	125178	103062	104251	92210.8	94203.3	167058	161061	151686	131007	172392	133633	136473
GM1 t40:3_26.28	GM1 t40:3	26.28	C77 H135 N3 O32	-1.88	1613.9	1614.91	[M+H]+1	350017	413068	650018	739757	593435	508780	437256	386222	889051	998098	611575	314978	369943	332368	508322	821882	473578	504901	445635	451557	331999	354464	393209	356951	515285	487831	294417	940948	323015	425363	620636	321806	455871	399512	331658	335064	480970	385578	321788	902790	434575	349560
GM1 t42:2_4.02	GM1 t42:2	4.02	C79 H141 N3 O32	-2.09	1643.95	822.98	[M+2H]+2	337046	302201	290393	327064	340706	333248	341366	276991	630496	385595	321425	301390	268367	347833	306607	304568	315763	201198	32752.4	81201.5	44576.1	388832	27833	36847.4	36408.5	287374	207532	304458	433815	269686	315108	358316	354419	48831	39824.3	42010.6	31591.6	37322	240604	314969	468055	375030
GM1 t42:2_29	GM1 t42:2	29	C79 H141 N3 O32	1.71	1643.95	1644.96	[M+H]+1	338672	486834	959062	627747	417302	323585	830584	341479	683068	558367	511301	350258	533683	315868	362117	521857	518537	373955	359853	470994	322350	570608	311234	294743	455411	849129	291759	622366	571429	310903	551666	200109	246786	345745	896541	594756	455286	408076	287232	682849	424693	480035
GM1 t42:4_11.21	GM1 t42:4	11.21	C79 H137 N3 O32	-7.8	1639.91	820.96	[M+2H]+2	290911	353681	328048	219616	385460	262108	684193	280540	621727	374744	343796	355611	379502	332620	293178	313340	319851	297910	2.96535e+06	2.11963e+06	1.23411e+06	486102	2.05405e+06	2.28083e+06	1.87085e+06	370323	341733	310072	362340	315203	344224	410451	354097	5.65881e+06	2.79498e+06	3.40733e+06	3.42125e+06	2.47146e+06	338466	320346	388505	499209
GM1 t44:1_5.38	GM1 t44:1	5.38	C81 H147 N3 O32	-2.32	1673.99	838.004	[M+2H]+2	53311.9	59873.3	65215.4	61179.8	59229.1	58153.2	54198.3	57213.9	79964.2	67050.8	66938.2	53606.9	57204	62753.3	53678.7	53564.6	56753.3	49723.5	19732.8	19803.1	17526.2	66292.6	20009	24354.5	19070.8	43594.6	50999.6	57618.2	67381.4	61108.9	63975	51582.9	59602	17724.6	21156	16797.9	19030	16809.1	57034.5	62591.2	61391.7	67838.9
GM1 t46:4_8.48	GM1 t46:4	8.48	C83 H145 N3 O32	-9.4	1695.97	848.99	[M+2H]+2	128808	180694	170078	132822	163733	223354	300420	156231	157694	136157	148243	190001	191813	145200	138924	132155	140739	134811	191575	503200	254961	204982	234300	219169	325433	188162	200304	168794	147920	162040	162132	171628	160222	220411	313712	499157	300735	312406	163328	181084	159009	159646
GM2 d34:3_33.03	GM2 d34:3	33.03	C65 H113 N3 O26	-7.21	1351.75	1332.74	[M-H-H2O]-1	208609	214263	241507	233051	137270	167034	228094	240596	257415	187067	161793	192918	311757	313893	182403	192149	241151	189850	245827	271538	215735	234353	233120	194061	262605	266486	217186	236456	303356	231611	313131	242777	254113	192494	238276	264167	204282	307506	255810	236164	332766	277248
GM2 d36:0_24.72	GM2 d36:0	24.72	C67 H123 N3 O26	-0.23	1385.84	1386.85	[M+H]+1	692744	593218	861730	732384	1.89247e+06	660493	312867	670737	1.43284e+06	1.71034e+06	2.55221e+06	290004	412201	563709	911756	1.35127e+06	704137	593144	414439	1.62268e+06	443425	443003	390196	598667	726500	841304	682994	1.78649e+06	1.3874e+06	356776	986714	388501	397444	631391	435765	533380	467258	748443	436185	754816	583301	494828
GM2 d36:0_25.99	GM2 d36:0	25.99	C67 H123 N3 O26	0.65	1385.84	1386.85	[M+H]+1	457835	626741	715339	888903	865519	574334	414980	473775	881349	1.21733e+06	1.1163e+06	301890	410312	415352	558767	909896	642903	738362	376345	599670	334028	356808	356375	341496	638397	683623	320026	1.61798e+06	476402	354608	566908	355131	474118	363894	280738	394635	439894	577707	281966	1.01263e+06	396181	406510
GM2 d36:5_11.79	GM2 d36:5	11.79	C67 H113 N3 O26	-9.78	1375.75	688.881	[M+2H]+2	132078	180387	127276	80715.1	173845	156476	119959	133891	147969	151868	167304	129608	175557	184037	130352	139669	118885	123723	1.30321e+07	7.71723e+06	4.78786e+06	147364	8.15108e+06	1.03549e+07	7.42501e+06	124759	164568	343521	144230	156659	178179	125241	154777	1.57925e+07	1.13992e+07	1.03022e+07	1.42152e+07	9.20017e+06	147040	160665	144848	147865
GM2 d48:5_5.17	GM2 d48:5	5.17	C79 H137 N3 O26	-3.76	1543.94	1544.95	[M+H]+1	142196	150136	150585	162520	225117	173369	129040	134220	197869	184556	199613	130613	141676	162384	120269	182050	133488	104241	59783.9	113544	56431.4	172704	56468.8	57537.2	59648	108395	158182	181030	198296	151483	156036	121009	148775	47870.2	47516.5	49454	50545.8	47981.8	133692	156724	155749	162727
GM2 d50:0_23.93	GM2 d50:0	23.93	C81 H151 N3 O26	7.24	1582.07	792.042	[M+2H]+2	451242	442708	601668	659711	709429	450514	569111	369429	772612	772984	803211	373487	461812	319104	411331	882374	446375	384420	317749	418481	450979	376137	326404	449493	466698	461747	332995	1.93477e+06	446368	476127	347127	564874	371922	459436	417552	487346	490197	405948	317490	1.17676e+06	375806	418502
GM2 t36:0_29.09	GM2 t36:0	29.09	C67 H123 N3 O27	-0.76	1401.83	1400.83	[M-H]-1	70364.4	36551.9	61666.1	47441.9	43313.7	54859	46213.2	36273.4	83311.1	54714.7	77706.9	40217.2	50253.8	58161.9	41874.2	46386.5	70843.4	42845.6	40949.6	63647.4	52316.3	88119.8	38727.6	32753.1	45929.6	34599.3	32636.8	65711.8	56164.6	30138.9	58449.4	39448.3	42045.3	40961	47071.3	76976.3	56679.1	53380.2	49903.4	62763.5	58887.9	49963.5
GM2 t41:2_34.92	GM2 t41:2	34.92	C72 H129 N3 O27	-1.51	1467.88	1466.87	[M-H]-1	281995	266157	244515	191705	128098	371741	396618	376802	307585	395982	160526	181193	262449	294765	215039	469772	165228	327169	369285	272132	399491	189541	161789	501681	156626	371350	358461	180931	446324	300117	459710	175148	251006	550105	388363	542719	482892	186766	294377	312401	376107	240101
GM2 t49:0_6.54	GM2 t49:0	6.54	C80 H149 N3 O27	-9.61	1584.02	1585.03	[M+H]+1	65087.2	67491.2	77353.9	63422.3	158313	98023	70507.5	66409.6	100988	141277	135349	63620.4	65456.5	68310.8	80399.3	99100.3	64591.5	65045	58083.7	91704.6	72754.7	77604.9	64731.4	347479	65816.4	63006.9	62445	125350	75308.5	69565.9	78356.9	66152.5	61017.8	92954.6	68119.7	69808.3	58264.4	57585.9	59472.2	83609.5	70398.8	69099.7
GM2 t49:0_29.03	GM2 t49:0	29.03	C80 H149 N3 O27	4.75	1584.05	1583.04	[M-H]-1	174511	100108	150158	117939	123528	162448	131131	83169.1	243495	146206	156733	86674	123873	138438	128323	142697	193594	106711	113124	189414	155720	170833	100059	95056.5	102810	79590.1	96947.1	167833	177517	74512.7	97516.6	91155.6	122085	123289	108133	207328	197730	167424	151004	161349	173977	103653
GM3 d31:1_5.36	GM3 d31:1	5.36	C54 H98 N2 O21	8.11	1110.68	1111.68	[M+H]+1	119743	132051	137407	139397	138476	139045	125161	120548	184907	152514	157746	119848	147941	132347	117482	129878	128854	115141	46695.4	52687.4	40319	151494	45843	57429.5	42988.2	103906	112425	135548	146588	136564	139070	120785	133180	40907.7	44575	36306.8	40095.5	40114.1	120170	131878	137429	151602
GM3 d31:5_12.89	GM3 d31:5	12.89	C54 H90 N2 O21	-9.01	1102.59	1103.6	[M+H]+1	257454	430445	314305	229887	411823	494186	304532	339917	332010	753940	441077	278221	277148	354129	316340	409820	599481	506768	7.32428e+07	4.34141e+07	2.93241e+07	361140	5.70423e+07	6.44993e+07	5.32964e+07	1.47608e+06	271196	259786	361233	297246	278679	440025	410174	8.45964e+07	7.3155e+07	5.49392e+07	8.39158e+07	6.31674e+07	524734	240710	463122	309572
GM3 d32:2_16.93	GM3 d32:2	16.93	C55 H98 N2 O21	0.87	1122.67	1121.66	[M-H]-1	212770	179141	145284	219115	200544	197563	377397	170799	182267	188652	189483	207099	173199	173523	182114	160403	162740	181684	142627	169815	152705	210721	179042	199118	156292	175133	194104	170802	153482	189753	184139	138070	219409	178093	160610	144712	152681	139886	187976	195729	184958	173953
GM3 d36:3_23.04	GM3 d36:3	23.04	C59 H104 N2 O21	-8.88	1176.7	1177.71	[M+H]+1	3.78923e+06	3.6894e+06	2.95691e+06	2.25046e+06	2.24621e+07	7.82026e+06	2.16265e+06	4.141e+06	5.82722e+06	1.39238e+07	1.90305e+07	3.13913e+06	1.2522e+06	4.43393e+06	7.4622e+06	1.11618e+07	3.35948e+06	3.97922e+06	2.45462e+06	1.01228e+07	3.48426e+06	3.69126e+06	2.9422e+06	4.12802e+06	6.61604e+06	1.83203e+06	6.66438e+06	1.22405e+07	3.96649e+06	2.47451e+06	1.07191e+07	2.33617e+06	3.38649e+06	8.12171e+06	4.17989e+06	3.18638e+06	2.52833e+06	5.06631e+06	2.69548e+06	7.73824e+06	2.87721e+06	4.52787e+06
GM3 d36:5_22.99	GM3 d36:5	22.99	C59 H100 N2 O21	7.51	1172.69	1173.7	[M+H]+1	1.86374e+07	1.97391e+07	1.48831e+07	1.2878e+07	8.63713e+07	3.31961e+07	1.49724e+07	1.78145e+07	2.78986e+07	5.823e+07	7.91517e+07	1.21273e+07	1.10239e+07	2.25125e+07	3.14329e+07	4.35275e+07	1.89298e+07	1.9501e+07	1.31022e+07	4.32669e+07	1.67003e+07	1.50413e+07	1.70208e+07	1.92174e+07	2.4819e+07	1.85837e+07	2.81572e+07	6.1591e+07	2.68844e+07	1.29935e+07	2.73853e+07	1.52393e+07	1.67762e+07	3.11312e+07	1.88619e+07	1.64813e+07	1.55612e+07	2.35596e+07	1.36772e+07	2.7196e+07	1.76826e+07	1.71828e+07
GM3 d38:0_28	GM3 d38:0	28	C61 H114 N2 O21	2.13	1210.79	1211.8	[M+H]+1	1.51203e+06	1.84447e+06	2.34118e+06	2.80011e+06	4.35195e+06	2.18145e+06	2.36318e+06	1.22166e+06	2.86147e+06	3.92922e+06	3.49729e+06	1.35794e+06	1.70577e+06	1.40721e+06	1.72155e+06	2.70993e+06	2.02819e+06	2.04813e+06	1.43042e+06	2.10369e+06	1.15038e+06	1.2643e+06	961169	1.87198e+06	1.69494e+06	2.65407e+06	1.64256e+06	4.40748e+06	1.53172e+06	1.69475e+06	1.80143e+06	1.33194e+06	911905	1.27964e+06	1.49238e+06	1.18736e+06	2.1106e+06	1.45973e+06	965259	3.22983e+06	1.13053e+06	1.21632e+06
GM3 d40:2_27.78	GM3 d40:2	27.78	C63 H114 N2 O21	-3.32	1234.79	1233.78	[M-H]-1	8.7385e+06	5.16249e+06	6.28608e+06	8.00511e+06	8.90387e+06	8.71049e+06	8.61847e+06	6.77506e+06	8.99294e+06	8.97984e+06	8.69447e+06	9.36804e+06	8.72904e+06	8.66522e+06	6.86598e+06	8.30605e+06	8.48698e+06	7.01733e+06	9.40135e+06	9.31367e+06	9.01594e+06	8.95497e+06	9.00343e+06	7.38259e+06	8.713e+06	4.6808e+06	7.53911e+06	7.08345e+06	6.53199e+06	9.23367e+06	8.92233e+06	8.7504e+06	8.58247e+06	7.60577e+06	8.68694e+06	6.71447e+06	9.03088e+06	8.80608e+06	8.43853e+06	9.04393e+06	8.66415e+06	9.23046e+06
GM3 d40:5_24.2	GM3 d40:5	24.2	C63 H108 N2 O21	7.45	1228.75	1227.75	[M-H]-1	386048	294514	374941	667479	491668	279993	323377	228395	440222	435591	333872	214826	389502	329835	320733	294418	532540	327815	272718	524820	292235	470336	324527	226905	377871	442037	290714	897203	514094	191781	412965	255071	338017	260866	236366	295557	367547	410116	278139	398437	366914	478560
GM3 d41:5_35.5	GM3 d41:5	35.5	C64 H110 N2 O21	-6.13	1242.75	1243.76	[M+H]+1	144435	233882	306481	308049	139649	138425	408798	219155	222635	162348	132894	305599	220540	116416	196442	160822	282464	293210	198620	140419	169651	389921	198182	205999	232685	368805	176924	255777	187787	147934	320819	142817	199492	240367	128883	182605	240998	200651	168763	295480	203205	308752
GM3 d41:5_33.02	GM3 d41:5	33.02	C64 H110 N2 O21	-2.46	1242.76	1243.76	[M+H]+1	231825	220901	270945	319249	175394	189005	325033	194814	267168	231459	198301	234583	233570	206314	194292	218592	212165	226981	218350	232265	208688	266746	429296	202054	290059	332509	189253	314571	344887	203670	398190	220848	239546	281092	193860	240183	260470	326362	206357	323272	357902	280637
GM3 d42:1_30.07	GM3 d42:1	30.07	C65 H120 N2 O21	1.43	1264.84	1263.83	[M-H]-1	172066	155988	181471	226271	150802	164618	191084	163114	244953	165817	184171	196819	204392	247439	150919	161335	252037	189151	185584	249037	190093	201636	244169	162388	256382	183817	171763	156045	227463	168067	182729	203956	217414	189013	171806	191960	192560	225002	207334	242421	217720	181938
GM3 d42:2_28.04	GM3 d42:2	28.04	C65 H118 N2 O21	1.1	1262.82	1263.83	[M+H]+1	1.12934e+06	1.18727e+06	1.29886e+06	1.53694e+06	1.90828e+06	1.32542e+06	987781	841008	2.07099e+06	1.65803e+06	1.94398e+06	684171	939245	853752	1.23789e+06	1.4831e+06	958532	1.33376e+06	658479	1.20371e+06	730948	736370	714403	958223	887547	1.53333e+06	736937	2.80532e+06	805331	702512	1.21213e+06	1.16079e+06	742168	877317	643136	829115	1.21839e+06	829493	666102	1.42856e+06	628073	764769
GM3 d43:2_30.37	GM3 d43:2	30.37	C66 H120 N2 O21	1.4	1276.84	1275.83	[M-H]-1	84698	74173.6	101960	111937	124436	124119	94563.2	89420.8	126583	146434	141851	88070.2	91911.4	120341	84541.7	100433	127245	85158.1	84438.5	149241	99082.6	84031.9	95168.1	83334.6	149678	97345.7	85072.9	131342	164358	78495.8	138230	88893.4	108762	112040	86870.8	105632	89602	122178	100422	196724	123328	92517.7
GM3 d43:2_30	GM3 d43:2	30	C66 H120 N2 O21	2.85	1276.84	1275.83	[M-H]-1	146144	125046	153295	199190	116481	140014	136630	128752	178435	138949	150517	157091	146239	171533	118661	135814	189054	154599	152086	186056	162028	173085	174432	140574	200519	183736	151488	116814	200828	152101	188552	154154	156739	168400	139021	183688	161266	165939	172919	186119	177429	144258
GM3 d45:1_2.1	GM3 d45:1	2.1	C68 H126 N2 O21	4.45	1306.89	654.453	[M+2H]+2	1.23874e+06	1.25473e+06	1.02587e+06	1.35906e+06	4.14306e+06	2.20345e+06	2.55679e+06	1.30369e+06	1.33753e+06	1.28132e+06	1.66119e+06	1.90145e+06	1.20671e+06	1.06079e+06	742250	2.51088e+06	1.18686e+06	728597	1.20117e+06	890475	1.13494e+06	1.86864e+06	1.26513e+06	845014	1.55223e+06	976470	1.00088e+06	1.37135e+06	1.36781e+06	1.06283e+06	1.09385e+06	931666	1.4101e+06	1.06828e+06	1.02395e+06	933524	1.13145e+06	1.33727e+06	1.45741e+06	945600	1.39395e+06	1.06519e+06
GM3 d48:2_4.47	GM3 d48:2	4.47	C71 H130 N2 O21	4.98	1346.92	674.469	[M+2H]+2	443196	833618	312927	304900	856700	472918	427305	308042	718168	742644	705358	313318	478192	819135	428555	537787	296764	401547	166251	368716	191993	366704	125366	222034	143922	527874	1.06023e+06	699533	935968	740668	2.00296e+06	404948	893961	185541	145810	151858	123340	137820	548331	455426	317318	496108
GM3 d49:0_3.87	GM3 d49:0	3.87	C72 H136 N2 O21	-1.59	1364.96	683.488	[M+2H]+2	4.12499e+07	3.01052e+07	4.54223e+07	3.95835e+07	5.36036e+07	3.26694e+07	3.55043e+07	4.72081e+07	4.99194e+07	5.97161e+07	5.55764e+07	3.17384e+07	5.17722e+07	5.60706e+07	3.55988e+07	4.82554e+07	3.75454e+07	4.00582e+07	131642	331084	178581	6.66141e+07	111505	144238	145860	4.78664e+07	4.31293e+07	5.16427e+07	6.44263e+07	3.14978e+07	7.35241e+07	4.54362e+07	5.40744e+07	196894	159544	168303	124431	149520	5.83003e+07	4.63776e+07	4.77916e+07	5.83778e+07
GM3 d50:0_40.18	GM3 d50:0	40.18	C73 H138 N2 O21	-9.67	1378.97	1379.97	[M+H]+1	1.76395e+06	2.89091e+06	3.15814e+06	3.24662e+06	1.27314e+06	1.70964e+06	3.86846e+06	3.06649e+06	2.94814e+06	2.4382e+06	1.4147e+06	2.6026e+06	2.59344e+06	2.43234e+06	2.33832e+06	2.45267e+06	3.18467e+06	3.82701e+06	3.75363e+06	2.75831e+06	2.06265e+06	2.49303e+06	3.3242e+06	4.1006e+06	2.96981e+06	4.96016e+06	1.89971e+06	2.73001e+06	4.46541e+06	3.57919e+06	5.15929e+06	1.90151e+06	2.41767e+06	2.90187e+06	3.08982e+06	3.28449e+06	3.16124e+06	3.08819e+06	2.13075e+06	2.77462e+06	3.24338e+06	3.66807e+06
GM3 d50:0_4.46	GM3 d50:0	4.46	C73 H138 N2 O21	-1.85	1378.98	690.496	[M+2H]+2	7.35493e+07	8.84019e+07	1.10824e+08	7.49061e+07	7.91003e+07	5.972e+07	7.91427e+07	9.19548e+07	1.2121e+08	8.66662e+07	1.18e+08	5.30131e+07	1.03233e+08	6.83075e+07	7.26979e+07	6.57902e+07	7.19251e+07	7.10296e+07	795835	1.66132e+06	796837	1.00167e+08	526854	863520	627464	8.64342e+07	8.50862e+07	1.25227e+08	1.00828e+08	1.06329e+08	1.14563e+08	8.41132e+07	6.49083e+07	860571	630488	647888	623689	591261	7.20214e+07	5.75863e+07	1.00757e+08	1.27281e+08
GM3 t30:4_9.44	GM3 t30:4	9.44	C53 H90 N2 O22	-1.53	1106.6	1107.6	[M+H]+1	59713.4	88798.6	93954.7	84659.9	107309	69784.8	76595.4	70986	143859	174157	119137	65403.2	70556	70694.8	78546.6	112129	93182.2	76637.8	6.25207e+06	2.59416e+06	1.83243e+06	76084.6	3.18794e+06	3.07217e+06	2.74466e+06	109529	66038.7	97926	60713.7	58359.4	81487.9	71762.8	73620.8	4.28124e+06	3.07494e+06	3.05042e+06	3.90432e+06	4.14423e+06	59028.9	136540	74830.9	93047.4
GM3 t34:0_6.75	GM3 t34:0	6.75	C57 H106 N2 O22	4.12	1170.73	584.357	[M-2H]-2	69974.4	71102.9	143688	81292	302235	149080	509456	61923.6	79337.6	489181	339499	88542.5	87115.4	65154.9	80872.6	324228	61508.1	68501.5	68217.9	246334	71859.8	64324.6	75276.4	425561	81300.4	87971.9	81705.1	642957	137724	83595.9	93429.7	92240.1	63158.6	78340.2	59040.3	71062.3	71746.8	75847.1	69116.9	104181	84756.1	71212.4
GM3 t36:0_24.45	GM3 t36:0	24.45	C59 H110 N2 O22	3.73	1198.76	1197.75	[M-H]-1	641162	622603	883480	901617	1.29925e+06	841022	674393	803881	1.96634e+06	1.94022e+06	1.66177e+06	939189	800307	1.26016e+06	1.13664e+06	1.14129e+06	1.13117e+06	666820	660617	2.295e+06	609191	1.1009e+06	969245	448950	1.40392e+06	751184	585736	1.75709e+06	742522	522125	1.42653e+06	345573	619479	763987	629990	883093	713366	1.66792e+06	925077	1.63399e+06	1.25739e+06	909612
GM3 t37:0_33.96	GM3 t37:0	33.96	C60 H112 N2 O22	-7.55	1212.76	1213.77	[M+H]+1	908613	557672	1.08438e+06	807798	516596	636455	1.01857e+06	671869	862183	614777	681210	864503	750045	681886	516259	671882	728635	638024	732373	946138	748830	1.04782e+06	631479	757712	931791	982728	538369	917078	881914	771300	1.44855e+06	634945	649885	1.15257e+06	773546	950254	1.04611e+06	1.09333e+06	670765	834416	853773	1.06052e+06
GM3 t38:1_27.1	GM3 t38:1	27.1	C61 H112 N2 O22	-0.56	1224.77	1223.76	[M-H]-1	223659	224515	314259	721178	327917	305775	188374	140507	578756	1.02833e+06	564883	216560	223642	452033	249754	283212	481349	228861	267116	579508	309807	246644	373549	181578	338445	351264	363321	522687	419664	177967	488771	228310	296258	369494	202459	347592	270461	483013	365870	507199	390437	262488
GM3 t40:1_29.12	GM3 t40:1	29.12	C63 H116 N2 O22	0.46	1252.8	1251.8	[M-H]-1	794593	867425	752314	347193	860570	1.0254e+06	351205	745502	1.68482e+06	4.47084e+06	2.04969e+06	356837	245428	229485	494446	1.16458e+06	442436	849735	387700	3.20782e+06	616536	417848	278226	1.4508e+06	2.01636e+06	661485	790582	3.4589e+06	1.32621e+06	418988	1.27938e+06	516520	665862	308034	438487	293372	364883	914858	604891	3.50909e+06	261719	921568
GM3 t41:2_28.29	GM3 t41:2	28.29	C64 H116 N2 O22	-0.79	1264.8	1263.79	[M-H]-1	359824	276519	453251	833155	348773	437206	296883	311902	821473	552944	556434	362628	313229	614638	368343	464452	747962	377084	374661	682240	357688	395438	501535	259356	520492	351405	288203	498744	347366	338003	408105	323825	372989	218186	262762	313031	457293	658145	527174	838465	422121	359108
GM3 t43:4_24.68	GM3 t43:4	24.68	C66 H116 N2 O22	-8.46	1288.79	1289.8	[M+H]+1	443740	353768	610965	386256	1.46065e+06	625081	322890	657695	1.05636e+06	1.24336e+06	1.48522e+06	274261	351519	727931	899138	1.00432e+06	403115	519694	269645	1.64956e+06	326074	369455	267413	368229	582844	721020	363761	1.63726e+06	594144	324308	1.10113e+06	276803	310975	570126	420522	441442	333560	567429	306362	963258	455147	348531
GM4 d32:2_22.93	GM4 d32:2	22.93	C49 H88 N2 O16	-8.89	960.605	961.612	[M+H]+1	1.38233e+07	1.26153e+07	1.13646e+07	1.06557e+07	7.51198e+06	8.24599e+06	6.39365e+06	1.37689e+07	1.47053e+07	1.08118e+07	9.99615e+06	1.10537e+07	9.94276e+06	1.25024e+07	1.01166e+07	1.24557e+07	1.21316e+07	1.08074e+07	1.27295e+07	1.26756e+07	1.20748e+07	1.20284e+07	1.09842e+07	1.26271e+07	1.47431e+07	1.05197e+07	1.25576e+07	1.08899e+07	1.22106e+07	1.26549e+07	1.21165e+07	1.20408e+07	1.40798e+07	1.42645e+07	1.24401e+07	1.0894e+07	9.77871e+06	1.44006e+07	1.01053e+07	1.22908e+07	1.02432e+07	1.28393e+07
GM4 d33:5_29.74	GM4 d33:5	29.74	C50 H84 N2 O16	7.34	968.589	967.581	[M-H]-1	322773	447843	333924	341326	1.13443e+06	463483	589144	274638	466618	761895	625545	202124	260735	395263	267613	409148	405667	299383	204488	819144	336518	245396	323686	302552	487459	258119	279171	423691	444494	595030	342924	251497	256428	499149	359237	242294	280739	449310	350091	815501	286014	277978
GM4 d34:1_33.46	GM4 d34:1	33.46	C51 H94 N2 O16	-4.47	990.656	989.649	[M-H]-1	2.08883e+06	1.86091e+06	5.97471e+06	2.00143e+06	6.57567e+06	4.89084e+06	2.12064e+06	2.49987e+06	5.89137e+06	5.24497e+06	8.38923e+06	919329	1.48757e+06	2.36506e+06	2.26112e+06	6.65983e+06	3.32568e+06	5.06358e+06	1.35795e+06	9.26636e+06	2.26909e+06	2.48209e+06	1.00012e+06	3.23148e+06	3.62942e+06	2.76415e+06	2.13694e+06	8.76231e+06	3.48041e+06	1.67779e+06	2.86603e+06	1.11006e+06	837731	2.25066e+06	2.53862e+06	2.57633e+06	5.84431e+06	3.0626e+06	2.18656e+06	5.73425e+06	1.13366e+06	1.22317e+06
GM4 d34:4_29.71	GM4 d34:4	29.71	C51 H88 N2 O16	2.08	984.615	983.608	[M-H]-1	465145	814042	778201	655604	1.37425e+06	802817	519276	412038	842899	717897	1.01935e+06	389375	360934	597347	682761	863513	650728	522855	369159	1.18046e+06	484952	353638	513489	499971	827694	842308	509436	1.1088e+06	704558	347528	652423	382379	480513	726037	1.09916e+06	371247	416577	642129	629867	1.18556e+06	929332	889751
GM4 d34:4_32.56	GM4 d34:4	32.56	C51 H88 N2 O16	6.29	984.62	983.612	[M-H]-1	339524	725985	331343	313822	807278	625431	255849	802436	638105	1.32542e+06	1.07725e+06	316072	324414	294393	304108	1.00639e+06	333207	294988	913874	682846	273249	653430	255372	395193	595296	248573	298423	1.50442e+06	452887	282023	590057	729498	387604	255322	318089	316491	406246	982723	675340	1.20436e+06	288885	449494
GM4 d34:6_32.57	GM4 d34:6	32.57	C51 H84 N2 O16	0.83	980.583	979.576	[M-H]-1	311940	275321	248309	235179	753020	309783	210680	258755	705323	1.04677e+06	776180	177499	243116	220619	309475	968005	212852	415163	279518	418956	400492	211667	184192	248019	479987	208064	408887	1.115e+06	601522	189283	382909	220307	290471	192182	238377	291955	357278	309113	260962	584312	247363	253436
GM4 d35:3_29.59	GM4 d35:3	29.59	C52 H92 N2 O16	-2.58	1000.64	999.635	[M-H]-1	382605	410886	449170	808922	747261	680136	357826	378700	1.01379e+06	777195	843028	446486	361844	673506	544821	506964	666151	397222	349946	879599	432168	319428	522195	376408	678081	400452	408684	668642	651338	368751	662406	407228	532400	715324	405469	356779	375783	664035	610352	1.01508e+06	564728	426891
GM4 d35:3_4.39	GM4 d35:3	4.39	C52 H92 N2 O16	4.8	1000.65	1001.66	[M+H]+1	285119	281043	303184	308598	594552	441887	360654	254955	577570	598540	490717	309989	315456	334129	282849	415909	270566	225550	173574	362338	173792	371345	114908	188336	136851	240478	230250	648408	323967	256975	336185	326411	267651	185084	133366	141306	123138	128955	244892	386305	310330	449078
GM4 d35:4_32.55	GM4 d35:4	32.55	C52 H90 N2 O16	0.55	998.63	997.626	[M-H]-1	780840	623669	1.22759e+06	828956	1.84714e+06	1.7868e+06	788546	597859	1.61749e+06	2.92161e+06	2.05812e+06	257423	493560	783673	936107	1.1335e+06	620907	942245	422738	2.11228e+06	515521	334836	391664	442955	920961	853033	562178	3.09023e+06	1.78451e+06	229743	1.77154e+06	267399	712008	564029	635192	644101	1.07279e+06	1.58846e+06	487936	1.82894e+06	465593	632435
GM4 d36:0_30.46	GM4 d36:0	30.46	C53 H100 N2 O16	-0.18	1020.71	1019.7	[M-H]-1	154833	149023	189717	224399	245364	234035	163076	168610	243299	285747	281136	166063	160375	225926	159410	200946	235727	164714	198453	281406	166559	158448	166635	143644	282228	164933	160411	263885	309909	140086	260642	167615	205078	189986	156022	199177	157893	226182	189353	253493	232543	174449
GM4 d36:0_30.8	GM4 d36:0	30.8	C53 H100 N2 O16	-0.18	1020.71	1019.7	[M-H]-1	161249	150285	172544	173574	148646	179273	153107	129336	198403	186753	200723	118266	124644	141550	138740	178612	159537	128813	120751	228464	137198	136082	136177	134146	181277	164651	121384	202577	204321	127630	201745	118658	159048	174541	141259	130621	120973	165172	132206	241970	133812	175030
GM4 d36:2_6.48	GM4 d36:2	6.48	C53 H96 N2 O16	6.15	1016.68	1017.69	[M+H]+1	79401.8	79167.3	98542.3	80811.4	181181	123443	86838	82628.7	117450	169207	161861	75502.6	74911.4	84111.3	98283.6	120591	78633.6	74065.4	79696.2	113981	92158.5	88864.5	72555.5	271026	81097.1	78176.4	73333.6	146000	88190.7	79614.4	100163	82752.2	77255.3	107042	77959.4	81413.9	80036.6	73252.9	78336.5	110842	92352.7	87547.6
GM4 d36:4_29.26	GM4 d36:4	29.26	C53 H92 N2 O16	-1.43	1012.64	1013.65	[M+H]+1	774433	1.88572e+06	2.8167e+06	1.7021e+06	1.19519e+06	657448	3.42799e+06	1.43952e+06	1.74369e+06	1.75852e+06	843619	1.83607e+06	1.59821e+06	1.59152e+06	1.2847e+06	1.43996e+06	2.08892e+06	1.49629e+06	1.43653e+06	1.45276e+06	953640	2.32304e+06	1.41988e+06	1.17344e+06	1.402e+06	3.36811e+06	1.17784e+06	1.70218e+06	2.09439e+06	1.40508e+06	1.84183e+06	788583	775289	1.08626e+06	1.10122e+06	1.98036e+06	1.31224e+06	1.26993e+06	1.39225e+06	2.70235e+06	1.74615e+06	2.50801e+06
GM4 d36:4_3.94	GM4 d36:4	3.94	C53 H92 N2 O16	4.99	1012.65	1013.66	[M+H]+1	375770	441339	443999	421231	546263	453141	492361	393162	853926	574212	434795	386331	441775	399901	379594	459053	413080	270255	40681.8	102316	53664.1	481394	34107.9	44574.1	43554.1	400679	325048	414941	535778	355556	345641	443612	489645	60846.7	41974.4	45529.6	34007.4	45032.6	314892	431163	573309	413349
GM4 d37:3_4.17	GM4 d37:3	4.17	C54 H96 N2 O16	8.87	1028.69	1029.69	[M+H]+1	3.29005e+06	4.47098e+06	5.41267e+06	3.73789e+06	3.75733e+06	2.54323e+06	2.64813e+06	3.47278e+06	4.67782e+06	3.15414e+06	4.09787e+06	3.71419e+06	4.19547e+06	3.49767e+06	3.49881e+06	3.95862e+06	1.7204e+06	2.5534e+06	532727	1.05357e+06	549468	5.52904e+06	380821	643971	445148	2.76241e+06	4.13558e+06	3.49668e+06	6.26553e+06	4.71062e+06	4.21709e+06	2.85157e+06	4.64918e+06	677121	496085	509776	490735	428671	3.66675e+06	3.10236e+06	3.92956e+06	5.24415e+06
GM4 d37:5_4.32	GM4 d37:5	4.32	C54 H92 N2 O16	4.67	1024.65	1025.66	[M+H]+1	250620	221679	221346	220579	413349	279631	264137	206018	404087	424340	299153	197879	231035	242939	214376	274186	221952	174510	127122	213886	111548	271967	77310.8	130733	93198.1	210102	159270	374464	268427	188276	215913	255640	220666	137463	100711	103490	99624.5	94444.7	200248	250709	252429	322721
GM4 d38:4_31.3	GM4 d38:4	31.3	C55 H96 N2 O16	-2.85	1040.67	1041.68	[M+H]+1	730707	702417	1.02588e+06	950440	3.05148e+06	1.59935e+06	949244	856525	1.43257e+06	1.85608e+06	2.83548e+06	804579	565268	918017	905688	1.65291e+06	754451	709580	571535	1.51069e+06	673682	728924	552600	759118	1.49641e+06	1.08269e+06	1.14893e+06	2.43174e+06	1.67858e+06	546037	2.32043e+06	654567	764723	1.08757e+06	722113	710030	888431	1.09287e+06	1.05137e+06	1.48722e+06	751537	903225
GM4 d38:5_5.75	GM4 d38:5	5.75	C55 H94 N2 O16	2.58	1038.66	1039.67	[M+H]+1	99723.7	146603	194708	143022	2.26264e+06	297875	102542	110404	276273	520788	567337	101431	108311	112135	190112	378718	139704	111533	142632	728398	161514	119682	126980	122440	186043	154606	77630.8	369565	132937	98078.2	189594	110116	101988	170382	147591	183337	135992	141093	89281.4	219556	147970	116065
GM4 d39:6_29.4	GM4 d39:6	29.4	C56 H94 N2 O16	-3.61	1050.66	1051.66	[M+H]+1	553501	816252	1.38066e+06	1.1393e+06	1.3977e+06	1.04379e+06	918604	591427	1.16575e+06	1.46848e+06	1.54638e+06	721052	835131	760527	853389	941448	1.01731e+06	979847	574161	1.11811e+06	503439	661371	595620	643750	777817	1.63886e+06	632972	2.05846e+06	1.32504e+06	841497	1.19687e+06	543896	512742	885650	601023	872791	684958	688432	1.11735e+06	1.7915e+06	901099	1.34682e+06
GM4 d40:5_7.33	GM4 d40:5	7.33	C57 H98 N2 O16	4.44	1066.7	532.341	[M-2H]-2	44978.2	36680	256028	31844	423621	133087	156870	35102.2	125377	321335	313882	42529.9	41263.5	37555.5	110289	248350	80020.2	31617.2	26375.9	102903	29825.5	43094.1	27535.5	60543.7	33314.3	46804.1	43903.2	273383	147495	40704.9	63214.2	66877.1	32125.3	41235.6	22594.2	30464.4	34390.3	25358	28052.5	113540	33565.5	84150.7
GM4 d40:6_30.47	GM4 d40:6	30.47	C57 H96 N2 O16	-3.01	1064.67	1065.68	[M+H]+1	364113	408260	409666	491780	457539	490049	518186	568997	386875	450888	479553	528202	708864	408351	408151	403938	356624	434211	405596	556724	521166	559427	580168	586185	555567	570862	524531	565567	520977	481926	468193	505434	459507	680423	546027	563555	619822	481122	430250	393390	546038	406152
GM4 d41:4_34.05	GM4 d41:4	34.05	C58 H102 N2 O16	-3.26	1082.72	1083.73	[M+H]+1	656479	510892	675064	561483	407558	502119	803581	430450	623056	443940	521984	682032	591733	515156	407292	495463	480323	503356	645135	607363	497706	826654	498193	597782	721890	723900	422120	709179	558536	560066	1.14281e+06	497491	493307	909296	610274	749684	763877	786249	480365	658295	701306	1.01143e+06
GM4 d42:3_35.8	GM4 d42:3	35.8	C59 H106 N2 O16	5.77	1098.76	1097.75	[M-H]-1	75625.1	65756.3	119221	82988.2	65048	67814.7	105592	72806.1	120009	81847.2	63420.1	106482	76971.9	72672.4	90292	62103.3	87436.5	96550.4	100927	68771.2	74080.5	80737.4	69150.2	69361.5	86202.3	111593	68752.3	103015	136890	83042	83318.3	66810.8	124985	44098.3	89759	102730	92050.4	89860.7	87852.5	92123.2	58252.5	54256.9
GM4 d44:1_3.83	GM4 d44:1	3.83	C61 H114 N2 O16	-2.32	1130.81	566.414	[M+2H]+2	8.60802e+07	8.17207e+07	1.32108e+08	1.20708e+08	1.19957e+08	9.37346e+07	7.8358e+07	1.18314e+08	1.65614e+08	1.11702e+08	1.94619e+08	1.0355e+08	1.26445e+08	1.24066e+08	1.05036e+08	1.3819e+08	7.95239e+07	7.9968e+07	111489	280397	147067	2.05879e+08	93472.8	122155	119360	1.03179e+08	1.13508e+08	1.25647e+08	1.59744e+08	1.29022e+08	1.36725e+08	1.22314e+08	1.0779e+08	166750	115031	124774	93197.2	123412	1.04826e+08	1.04017e+08	1.41591e+08	1.6033e+08
GM4 d45:2_5.57	GM4 d45:2	5.57	C62 H114 N2 O16	4.99	1142.82	1143.83	[M+H]+1	2.70855e+06	3.40983e+06	4.19081e+06	5.8801e+06	2.98603e+06	3.23042e+06	3.25249e+06	3.80093e+06	4.90176e+06	3.28749e+06	4.62924e+06	2.25166e+06	3.97369e+06	4.11094e+06	4.29253e+06	3.42938e+06	2.97311e+06	2.56029e+06	900370	4.59803e+06	1.01956e+06	3.0473e+06	801567	772908	1.1744e+06	3.1552e+06	4.84596e+06	3.52104e+06	6.6844e+06	3.43884e+06	5.16511e+06	4.08213e+06	5.64892e+06	1.07554e+06	943653	1.15732e+06	888264	890655	3.46029e+06	3.34387e+06	5.15577e+06	8.15097e+06
GM4 d45:3_3.92	GM4 d45:3	3.92	C62 H112 N2 O16	5.72	1140.81	571.411	[M+2H]+2	905084	1.19686e+06	2.30368e+06	1.089e+06	1.30095e+06	1.26564e+06	1.06793e+06	1.00886e+06	2.24182e+06	3.06454e+06	1.12008e+06	1.07139e+06	961160	1.17813e+06	2.0808e+06	1.07165e+06	2.11616e+06	625028	88239.2	221924	119702	1.04415e+06	74741.1	96681.6	97769.2	927722	844819	911982	1.5503e+06	3.13109e+06	906921	962199	1.06204e+06	131977	92589.5	101503	83405.1	100222	963692	2.83831e+06	2.43264e+06	1.20597e+06
GM4 d46:1_5.67	GM4 d46:1	5.67	C63 H118 N2 O16	-2.33	1158.85	580.43	[M+2H]+2	4.34308e+07	4.65875e+07	6.60586e+07	3.16444e+07	6.32837e+07	4.86692e+07	4.77538e+07	5.26352e+07	7.48115e+07	5.61495e+07	5.63558e+07	4.32184e+07	3.78255e+07	5.88355e+07	5.25902e+07	5.58829e+07	4.30357e+07	4.54545e+07	1.4758e+06	8.20024e+06	1.80642e+06	5.58173e+07	1.52927e+06	1.27498e+06	1.98266e+06	4.38552e+07	4.69015e+07	5.60232e+07	7.47502e+07	5.70599e+07	4.40417e+07	4.43048e+07	5.95891e+07	2.05607e+06	1.66006e+06	2.01517e+06	1.55744e+06	1.60727e+06	3.88947e+07	4.63936e+07	5.62066e+07	6.77385e+07
GM4 d46:6_29.96	GM4 d46:6	29.96	C63 H108 N2 O16	9.2	1148.78	575.398	[M+2H]+2	545940	451540	1.19906e+06	711733	1.20561e+06	433227	522396	510036	533241	450437	581802	633896	648572	2.07869e+06	475053	544795	437612	539977	713208	656713	652664	626711	605214	709682	781924	574792	486159	2.04904e+06	624109	531120	694407	551724	601839	3.20539e+06	626970	718656	769125	661747	524115	629793	632946	532553
GM4 d47:1_6.65	GM4 d47:1	6.65	C64 H120 N2 O16	2.65	1172.87	587.441	[M+2H]+2	1.11084e+07	1.559e+07	1.89293e+07	1.57323e+07	8.74224e+06	1.44838e+07	1.17992e+07	1.29733e+07	2.00359e+07	1.41701e+07	1.73635e+07	7.91554e+06	1.29685e+07	1.25495e+07	9.65034e+06	1.55481e+07	9.9268e+06	1.20778e+07	822300	490222	396366	1.4121e+07	781627	2.1174e+06	586971	1.22735e+07	1.20536e+07	1.0768e+07	1.9468e+07	1.73216e+07	1.27584e+07	1.20046e+07	1.36289e+07	573297	732559	534909	576122	510655	1.31426e+07	1.1074e+07	1.59204e+07	1.93377e+07
GM4 d49:2_27.87	GM4 d49:2	27.87	C66 H122 N2 O16	-9.68	1198.87	1199.88	[M+H]+1	2.15038e+07	2.83699e+07	3.04305e+07	2.64809e+07	4.45298e+07	1.76857e+07	2.09237e+07	1.52185e+07	2.92851e+07	4.08344e+07	3.14518e+07	1.26091e+07	1.25454e+07	1.48045e+07	2.55393e+07	3.48853e+07	2.62203e+07	2.65676e+07	2.01439e+07	3.37021e+07	1.79223e+07	9.18859e+06	6.63369e+06	2.41987e+07	2.19181e+07	2.73563e+07	1.43747e+07	4.53823e+07	1.80017e+07	2.31085e+07	2.77798e+07	1.16384e+07	7.77289e+06	7.1736e+06	1.63923e+07	7.73288e+06	1.24715e+07	1.54481e+07	1.7077e+07	4.24908e+07	1.97557e+07	1.07337e+07
GM4 t32:2_33.95	GM4 t32:2	33.95	C49 H88 N2 O17	-0.66	976.608	977.615	[M+H]+1	2.08997e+06	1.14818e+06	1.89485e+06	1.10972e+06	580467	481421	799267	1.40062e+06	2.16285e+06	544994	1.60486e+06	525453	1.6515e+06	2.5407e+06	842330	1.65034e+06	2.34618e+06	1.11781e+06	529388	2.72165e+06	1.51026e+06	776441	690828	827396	1.21614e+06	1.26131e+06	928920	2.23646e+06	3.09226e+06	2.78418e+06	895144	1.55583e+06	1.18896e+06	1.08577e+06	2.18763e+06	2.23406e+06	3.2589e+06	3.2784e+06	832228	751973	1.12103e+06	1.55247e+06
GM4 t32:6_31.13	GM4 t32:6	31.13	C49 H80 N2 O17	-1.04	968.545	967.537	[M-H]-1	117657	115218	108417	134663	202784	135583	113375	116397	164877	166469	167823	124325	114803	151919	94436.7	151946	144677	118102	96188.4	197424	119535	105235	102085	114744	160340	134627	130360	170492	187852	106070	180078	106177	133182	137183	132264	129458	120097	133238	139190	168244	146427	119855
GM4 t33:4_33.05	GM4 t33:4	33.05	C50 H86 N2 O17	8.92	986.601	985.594	[M-H]-1	172239	176907	199401	192420	113338	137912	188327	198649	212536	154453	133585	166573	257403	269986	150602	158648	199107	156751	202968	224197	178123	193494	192477	170894	216821	220025	179321	204198	266307	191231	258538	200449	209809	158933	196733	218111	168666	253893	211210	194989	274749	228911
GM4 t34:0_31.99	GM4 t34:0	31.99	C51 H96 N2 O17	6.02	1008.68	1007.67	[M-H]-1	171707	119627	108885	111994	510253	110239	127185	187898	144424	621870	147431	172799	146905	246946	135523	150383	167006	91783.2	130054	224401	176928	164350	165258	133702	179399	141240	207354	220970	238708	186952	388986	153291	196286	109835	181644	168635	172465	223963	179836	134577	249837	182433
GM4 t34:4_31.34	GM4 t34:4	31.34	C51 H88 N2 O17	1.04	1000.61	999.602	[M-H]-1	1.94553e+06	1.12162e+06	2.21068e+06	2.41396e+06	6.87244e+06	4.45532e+06	2.46444e+06	1.5584e+06	3.48175e+06	2.44103e+06	3.12571e+06	1.68774e+06	1.4066e+06	2.31282e+06	2.82317e+06	5.02684e+06	1.58427e+06	1.5483e+06	744262	3.74253e+06	2.24399e+06	1.04516e+06	863269	1.06693e+06	2.3967e+06	2.95905e+06	2.91632e+06	5.04433e+06	1.22418e+06	1.25179e+06	5.69433e+06	712201	1.43942e+06	1.78414e+06	1.01801e+06	400144	2.43011e+06	2.8477e+06	1.14497e+06	4.25185e+06	1.7189e+06	1.60861e+06
GM4 t34:5_31.32	GM4 t34:5	31.32	C51 H86 N2 O17	4.02	998.597	999.604	[M+H]+1	485789	466981	559814	580613	1.46134e+06	662394	631076	569435	952402	1.23396e+06	3.50567e+06	763441	397670	495216	1.06341e+06	940507	422658	413721	299892	1.00434e+06	506453	408810	339217	504677	748449	719797	629093	1.61667e+06	1.11595e+06	314901	1.25875e+06	360359	525121	723037	640093	472042	867255	535660	698971	1.57033e+06	499637	473922
GM4 t37:5_37.2	GM4 t37:5	37.2	C54 H92 N2 O17	-5.35	1040.63	1041.64	[M+H]+1	3.00058e+06	5.59323e+06	3.39589e+06	6.04058e+06	777149	2.75042e+06	9.50813e+06	5.90345e+06	3.38071e+06	3.3114e+06	2.65704e+06	8.01402e+06	6.63482e+06	3.45639e+06	4.51638e+06	6.07181e+06	4.2191e+06	2.11952e+06	2.66221e+06	5.4569e+06	5.80355e+06	6.93998e+06	4.89565e+06	6.48981e+06	9.0185e+06	5.85938e+06	5.73252e+06	6.65991e+06	3.32714e+06	2.74966e+06	4.91896e+06	1.68715e+06	2.26988e+06	3.11432e+06	2.76528e+06	3.86924e+06	2.3557e+06	6.91421e+06	4.6985e+06	1.21417e+07	5.93774e+06	6.7283e+06
GM4 t39:1_31.12	GM4 t39:1	31.12	C56 H104 N2 O17	2.7	1076.74	1075.73	[M-H]-1	79095.9	71890.1	84543	101611	116618	89849.8	81518.9	76697.6	115280	107136	126445	86333.4	87529.3	101430	72132.6	107857	101566	87420.7	75763.4	129978	82861	77490.3	70581.1	82249.3	121927	97479	95581.6	114591	118230	81426.7	122170	83630.9	76633.4	85310.8	86138.6	88148.4	81683.1	104945	94947.3	110798	95778.1	77206.2
GM4 t40:5_17.89	GM4 t40:5	17.89	C57 H98 N2 O17	3.44	1082.69	1083.7	[M+H]+1	2.85442e+06	1.80461e+06	2.79773e+06	2.90628e+06	2.65645e+06	3.73808e+06	2.65344e+06	2.9377e+06	2.35117e+06	2.3951e+06	2.3148e+06	3.01075e+06	2.81779e+06	3.13367e+06	2.14132e+06	3.10013e+06	1.75153e+06	2.35093e+06	2.24907e+06	3.25749e+06	2.39143e+06	2.20705e+06	3.2682e+06	3.17125e+06	2.54184e+06	2.19509e+06	3.5355e+06	3.04748e+06	3.19398e+06	3.06541e+06	2.30411e+06	2.52882e+06	2.75596e+06	2.81172e+06	1.72939e+06	2.63193e+06	3.40209e+06	4.18396e+06	2.84235e+06	2.27938e+06	2.66958e+06	2.39632e+06
GM4 t44:2_5.75	GM4 t44:2	5.75	C61 H112 N2 O17	8.01	1144.81	573.41	[M+2H]+2	332931	446970	726363	527529	2.51858e+06	1.37166e+06	426521	344408	1.09726e+06	2.18287e+06	2.21074e+06	325214	350538	396781	708830	1.22718e+06	431685	379245	457503	2.5421e+06	559996	402655	474078	395248	614631	483140	582484	2.02745e+06	431576	332554	747167	335726	329156	637388	514623	624708	482810	498258	300449	717247	451139	358098
GM4 t44:5_22.9	GM4 t44:5	22.9	C61 H106 N2 O17	3.36	1138.75	1139.76	[M+H]+1	863845	1.48717e+06	1.27984e+06	869599	962491	1.55571e+06	1.25751e+06	1.0463e+06	2.84651e+06	985899	940782	1.03659e+06	914746	536761	745522	886137	680699	695900	922927	690576	717756	775955	811916	1.42339e+06	1.40145e+06	1.00948e+06	840720	1.35441e+06	727081	1.16483e+06	1.66549e+06	793511	1.33357e+06	738315	480044	927684	899435	1.26782e+06	1.50221e+06	1.39221e+06	716516	1.33885e+06
GM4 t45:1_3.13	GM4 t45:1	3.13	C62 H116 N2 O17	-2.87	1160.82	581.419	[M+2H]+2	3.79805e+07	5.49545e+07	6.0752e+07	3.88081e+07	5.30421e+07	4.43042e+07	2.81585e+07	5.12669e+07	5.42414e+07	4.65694e+07	6.1955e+07	5.19895e+07	4.67098e+07	4.91448e+07	3.38616e+07	5.47083e+07	4.43531e+07	4.72162e+07	278543	276236	250461	7.22334e+07	313883	281468	251164	3.77321e+07	3.95184e+07	5.66044e+07	4.48127e+07	5.91346e+07	7.01636e+07	3.99147e+07	4.6946e+07	246828	231186	178649	300409	228207	4.77404e+07	8.87789e+07	7.39084e+07	7.22345e+07
GM4 t45:5_29.04	GM4 t45:5	29.04	C62 H108 N2 O17	-6.42	1152.76	1151.75	[M-H]-1	434434	275695	455129	329192	303692	453557	381700	253452	623660	386614	498394	242988	394524	414702	315480	366711	486206	300830	316318	553636	452337	536393	273782	251361	296740	217017	288785	426710	506450	213605	344327	263232	323622	316447	274148	684837	495247	556703	445187	410807	459083	318301
GM4 t46:1_3.67	GM4 t46:1	3.67	C63 H118 N2 O17	-1.82	1174.84	588.428	[M+2H]+2	9.12225e+07	8.20339e+07	1.03135e+08	8.78269e+07	1.20077e+08	1.01021e+08	8.0427e+07	1.13937e+08	1.86736e+08	9.25817e+07	1.58066e+08	1.14534e+08	1.26809e+08	1.2859e+08	1.00684e+08	1.12983e+08	8.92767e+07	1.05112e+08	112809	194622	126693	1.14857e+08	110196	124626	112951	1.10376e+08	1.10212e+08	1.21525e+08	1.16405e+08	1.29292e+08	1.24986e+08	8.82357e+07	1.35078e+08	159928	107015	93945.1	102969	100706	1.14063e+08	8.80138e+07	1.48207e+08	1.51023e+08
GM4 t47:1_4.47	GM4 t47:1	4.47	C64 H120 N2 O17	-2.1	1188.86	595.435	[M+2H]+2	1.13375e+08	7.44819e+07	1.44862e+08	1.3402e+08	1.23875e+08	1.38696e+08	8.26056e+07	1.25126e+08	9.19661e+07	1.34622e+08	1.59074e+08	1.10408e+08	1.32711e+08	1.03437e+08	1.1307e+08	1.34289e+08	1.07432e+08	9.25554e+07	654346	1.36596e+06	655169	1.38822e+08	433186	709997	515909	1.05324e+08	1.08661e+08	1.64025e+08	1.78179e+08	8.76939e+07	1.37815e+08	1.09601e+08	1.07892e+08	707572	518395	532701	512804	486142	1.11446e+08	1.09966e+08	1.37161e+08	1.67039e+08
GM4 t47:5_31.27	GM4 t47:5	31.27	C64 H112 N2 O17	-4.35	1180.79	1179.78	[M-H]-1	223243	269172	349671	253675	506574	332078	228850	272393	345639	470630	487505	268959	177759	320101	215112	383204	280560	175922	165957	550282	276501	214012	259025	228968	348935	322574	321571	868392	559894	193596	421299	231691	329216	957374	281615	295160	188249	324521	387552	447329	321984	265241
GM4 t47:5_30.98	GM4 t47:5	30.98	C64 H112 N2 O17	-4.28	1180.79	1179.78	[M-H]-1	419029	212230	382970	353505	2.62093e+06	866407	651791	784102	838083	1.59019e+06	1.65938e+06	225207	267210	687303	487271	1.44813e+06	720744	398140	166810	1.05478e+06	567691	260255	328229	579794	857200	782664	595601	2.4697e+06	1.16811e+06	258205	1.17854e+06	421562	475879	1.6182e+06	421687	491898	705818	647310	490264	842344	592918	334086
GM4 t47:6_29.14	GM4 t47:6	29.14	C64 H110 N2 O17	-3.81	1178.78	1177.77	[M-H]-1	256630	202101	267096	215337	1.1604e+06	268912	244679	238341	374921	548426	953864	152070	183284	212126	192656	456120	258377	156265	149625	306030	238286	511508	270991	229247	220467	184300	247602	1.14241e+06	261418	129008	311360	143874	288780	621285	171677	372533	266630	256149	327213	457149	278755	188450
GM4 t48:0_3.39	GM4 t48:0	3.39	C65 H124 N2 O17	-0.42	1204.89	603.452	[M+2H]+2	1.84638e+06	1.75971e+06	1.14502e+06	2.42712e+06	1.47449e+06	1.71486e+06	2.08461e+06	1.65379e+06	3.06424e+06	2.4223e+06	1.07873e+06	2.10605e+06	1.75282e+06	2.11746e+06	821526	1.25407e+06	1.44507e+06	787547	149033	142277	134008	2.23535e+06	163690	150598	134384	860972	1.15254e+06	1.06529e+06	1.69322e+06	1.20951e+06	1.12942e+06	2.05985e+06	2.22615e+06	132064	121365	131913	160733	122101	1.07824e+06	1.54477e+06	1.54114e+06	1.84273e+06
GM4 t48:1_5.38	GM4 t48:1	5.38	C65 H122 N2 O17	-2.09	1202.87	602.443	[M+2H]+2	7.68661e+07	7.96744e+07	9.25628e+07	7.38956e+07	7.17534e+07	6.65261e+07	5.85148e+07	7.17536e+07	1.09237e+08	6.68806e+07	7.98549e+07	6.4415e+07	7.743e+07	5.56881e+07	7.52364e+07	8.66359e+07	6.355e+07	5.17306e+07	528115	1.55123e+06	536456	8.21133e+07	526274	513201	619592	6.56378e+07	7.80788e+07	8.23789e+07	1.27693e+08	9.92635e+07	1.05554e+08	5.85018e+07	8.5617e+07	727327	1.04197e+06	591634	792307	559029	7.02655e+07	8.0882e+07	7.40909e+07	1.02737e+08
GM4 t49:1_6.34	GM4 t49:1	6.34	C66 H124 N2 O17	-1.51	1216.89	609.451	[M+2H]+2	2.59035e+07	2.64498e+07	3.57362e+07	2.87216e+07	3.15003e+07	3.57018e+07	2.50894e+07	2.82802e+07	4.78177e+07	1.8275e+07	3.62333e+07	2.6188e+07	2.7925e+07	1.89246e+07	2.79812e+07	3.94337e+07	2.85858e+07	3.14469e+07	458657	605413	676116	3.37253e+07	460368	2.11224e+06	538908	1.50867e+07	2.87555e+07	3.43974e+07	4.35153e+07	3.66493e+07	3.879e+07	2.50187e+07	2.77104e+07	734184	594709	560024	528024	559332	2.62975e+07	3.28476e+07	3.36782e+07	2.12101e+07
GM4 t49:3_5.54	GM4 t49:3	5.54	C66 H120 N2 O17	3.15	1212.86	607.439	[M+2H]+2	126398	142796	134245	144463	150540	194464	127913	130946	471053	378484	158100	779525	153926	190759	127268	311896	375380	138835	70454.5	71582.9	59134.1	644834	70469.2	69573.3	76680.1	113308	299855	362302	193782	145729	144111	131980	980291	76492.8	92737.6	56438.3	72700.2	69887.1	132166	467116	213684	492560
GM4 t50:0_4.22	GM4 t50:0	4.22	C67 H128 N2 O17	-0.05	1232.92	617.468	[M+2H]+2	627885	688302	631230	718114	867770	755756	723745	627551	1.31126e+06	1.21013e+06	1.22146e+07	640048	653053	692810	583452	764283	695466	600928	2.08554e+06	679597	585577	731883	1.10422e+06	349878	1.42593e+06	600297	454205	778438	765496	536924	637769	731792	670809	434133	678114	1.25767e+06	490738	235092	521017	714969	839016	920331
GM4 t50:1_7.44	GM4 t50:1	7.44	C67 H126 N2 O17	0.86	1230.91	616.461	[M+2H]+2	8.3513e+06	7.49129e+06	9.34716e+06	8.52461e+06	8.88777e+06	9.04233e+06	6.98383e+06	8.19894e+06	1.13586e+07	8.94239e+06	1.00705e+07	5.36036e+06	8.33392e+06	9.2541e+06	5.86499e+06	8.64637e+06	7.86617e+06	7.12069e+06	997062	653125	709423	8.81776e+06	1.09581e+06	655563	806043	7.28356e+06	7.05882e+06	8.01445e+06	1.10587e+07	9.85473e+06	8.25634e+06	5.87499e+06	5.16835e+06	794381	785168	865653	906058	827492	5.14425e+06	9.35829e+06	8.88226e+06	8.0755e+06
GM4 t50:3_5.35	GM4 t50:3	5.35	C67 H122 N2 O17	6.48	1226.88	614.448	[M+2H]+2	859118	667328	382032	674113	1.16794e+06	524828	763582	811880	1.20521e+06	787015	3.94856e+06	874430	346058	2.17904e+06	1.72955e+06	1.72923e+06	695027	1.30857e+06	783697	581490	265866	839531	935104	308927	585256	680543	455472	1.26907e+06	2.85515e+06	1.45184e+06	1.12915e+06	457635	910175	598960	1.93971e+06	355724	389055	294899	709992	1.44406e+06	320178	1.5603e+06
GT1 d36:1_20.4	GT1 d36:1	20.4	C95 H165 N5 O47	-5.49	2128.06	1063.02	[M-2H]-2	127678	144909	69466.4	61857.9	82307.6	47484.6	47922.9	113826	32032	33335.9	77474.7	69834.6	122301	33259.3	95876.4	111821	46150.5	71809.8	57584.3	34167.5	58406.1	93846.8	37726.3	131627	34215.9	118029	82600.4	77264.8	63417.3	113143	74047.7	43126.2	38351.6	103425	130836	95033.2	90729.7	39302.9	31194.4	45490.4	66322.3	45823
GT1 d36:1_22.74	GT1 d36:1	22.74	C95 H165 N5 O47	-0.22	2128.07	1063.03	[M-2H]-2	323868	324582	256257	371554	450995	296747	298433	274497	479755	470582	484813	272118	371945	241584	325420	361155	329127	343889	448827	370468	338678	295010	327059	349037	494544	419129	284729	515653	419128	348650	309783	303187	284740	371573	383733	493542	434386	423882	223716	354717	294472	396962
GT1 d36:2_20.39	GT1 d36:2	20.39	C95 H163 N5 O47	-0.54	2126.05	1062.02	[M-2H]-2	125442	142370	68249.6	60774.3	80865.8	46652.8	47083.5	111832	31470.9	32751.9	48988.9	68611.3	120159	32676.7	94196.9	109862	45342.1	70551.9	56575.6	33568.9	57383	92202.9	37065.4	129321	33616.6	115961	81153.5	75911.4	62306.5	111161	72750.6	42370.7	37679.8	101614	128544	93368.5	113980	38614.4	30648	44693.5	65160.5	45020.4
GT1 d37:1_22.74	GT1 d37:1	22.74	C96 H167 N5 O47	-4.37	2142.07	2143.08	[M+H]+1	273536	292978	342179	382163	239125	315033	384965	389165	484442	334996	345940	270816	303044	281595	299916	338104	343567	345983	364825	442287	367697	359291	513956	299381	473839	511278	355925	575573	342619	293862	386514	308329	363119	360036	329348	422535	341793	344479	342537	397570	331623	311627
GT1 d37:1_23.01	GT1 d37:1	23.01	C96 H167 N5 O47	-0.33	2142.08	1070.03	[M-2H]-2	897416	868177	907053	1.25353e+06	901780	741240	691810	1.01121e+06	1.0711e+06	1.01555e+06	818782	756912	948577	841019	687288	748622	1.04884e+06	1.01394e+06	1.23591e+06	1.15773e+06	827991	929773	747793	813538	1.12605e+06	1.41617e+06	887279	1.14016e+06	1.13098e+06	869558	1.184e+06	873795	1.05519e+06	1.15427e+06	1.05922e+06	1.08858e+06	1.34822e+06	971302	819553	1.19422e+06	1.12826e+06	1.15683e+06
GT1 d38:1_25.12	GT1 d38:1	25.12	C97 H169 N5 O47	-0.42	2156.1	1077.04	[M-2H]-2	6.02186e+06	5.81707e+06	8.03032e+06	9.51971e+06	8.27057e+06	1.08079e+07	4.5788e+06	5.33869e+06	1.46095e+07	1.18169e+07	1.39772e+07	1.18247e+07	5.22055e+06	1.15879e+07	8.82164e+06	7.95948e+06	9.70223e+06	5.7839e+06	8.32754e+06	1.48959e+07	7.90968e+06	6.37747e+06	1.07393e+07	5.74694e+06	8.58631e+06	6.67258e+06	6.58774e+06	1.15609e+07	7.75277e+06	4.22591e+06	9.98186e+06	5.39903e+06	7.60775e+06	9.53076e+06	5.97713e+06	9.6176e+06	7.77838e+06	1.15037e+07	8.31987e+06	1.41481e+07	8.44323e+06	8.58681e+06
GT1 d39:0_15.57	GT1 d39:0	15.57	C98 H173 N5 O47	3.82	2172.14	725.053	[M+3H]+3	394176	365269	479070	423800	652314	415589	445860	415251	387513	342035	602511	427131	461935	404770	566316	526871	294943	333808	501306	464484	571627	445895	453967	607876	711740	508226	480135	466982	466330	534154	390061	360563	354980	490620	427497	482123	545209	534522	423622	361802	463870	430283
GT1 d40:1_28.15	GT1 d40:1	28.15	C99 H173 N5 O47	1.85	2184.13	1093.07	[M+2H]+2	130676	164268	268642	283145	229362	149149	158346	140209	271836	365553	249788	170809	150870	142831	258052	223693	285377	205144	142021	193553	168034	125045	166703	145156	181925	271291	118473	328809	147754	134990	211358	121567	153522	138137	117328	161850	172693	169502	136660	338063	149036	162425
GT1 d41:0_9.3	GT1 d41:0	9.3	C100 H177 N5 O47	9.8	2200.18	734.402	[M+3H]+3	349661	355963	286932	275421	291138	424633	927118	295647	239235	284608	357680	355729	324396	358810	391162	271149	311829	206606	242326	273914	371567	252420	125114	377054	312379	372346	281094	424864	305548	380644	497766	559182	183875	511204	190716	441054	273634	326068	308163	331347	339287	226789
GT1 d44:0_11.58	GT1 d44:0	11.58	C103 H183 N5 O47	9.04	2242.23	748.417	[M+3H]+3	177862	227173	194711	129250	268421	241036	287091	360740	223896	249044	272955	210290	217757	225047	181862	259452	240896	388642	155757	113288	142127	201869	153481	133750	150743	159008	201332	259858	261978	224218	239722	184210	246976	178285	139881	136856	157029	131024	217125	232002	231109	239787
GT1 d46:0_11.49	GT1 d46:0	11.49	C105 H187 N5 O47	-2.81	2270.23	1136.12	[M+2H]+2	1.6603e+06	2.56816e+06	903525	441281	1.92498e+06	2.06497e+06	2.18924e+06	2.373e+06	3.67746e+06	3.05702e+06	2.86053e+06	3.62072e+06	2.86547e+06	2.57966e+06	1.55667e+06	1.71731e+06	1.16075e+06	1.81715e+06	191238	166456	142304	6.19259e+06	202409	162419	183883	2.4124e+06	2.59863e+06	2.93775e+06	4.3304e+06	2.65251e+06	4.65131e+06	2.59296e+06	3.09982e+06	222666	183078	201979	189269	178522	2.30123e+06	3.7883e+06	5.10628e+06	4.95858e+06
GT1 t34:1_19.89	GT1 t34:1	19.89	C93 H161 N5 O48	-3.67	2116.02	1057	[M-2H]-2	112842	155201	101402	111810	82301.5	45672.9	52722.3	166296	30506	99063.9	64955.3	62628.5	108696	48306.6	108893	97698.8	69586.2	117366	113201	39364.8	61077.6	83170.3	39071.5	161757	107532	147285	101045	69848.6	143699	108952	71676.2	66075.3	128252	119944	132338	114688	87040.1	47567.4	35344.7	50684.1	81936.9	66005.6
GT1 t38:1_14.85	GT1 t38:1	14.85	C97 H169 N5 O48	2.29	2172.1	1085.04	[M-2H]-2	164524	138162	444024	99952.5	120086	150213	184478	77429.5	77083.1	136147	136143	82744.4	81967.8	124310	98133.2	117563	96437.6	101590	73127.7	95018.4	92424.3	121267	74178.6	111589	80275.4	132821	121778	136728	283639	127529	118293	156824	83067.9	150084	71361.5	72572.1	83348.7	90308.3	136080	80573.3	95670.9	86380.3
GT1 t41:2_12.52	GT1 t41:2	12.52	C100 H173 N5 O48	8.18	2212.14	738.388	[M+3H]+3	2.83763e+06	6.08595e+06	4.65558e+06	5.75753e+06	5.42478e+06	4.32793e+06	5.83125e+06	4.74339e+06	5.6306e+06	4.06921e+06	7.02184e+06	5.99631e+06	6.18996e+06	5.17234e+06	3.02688e+06	4.54278e+06	4.03143e+06	3.08677e+06	3.56473e+06	6.20359e+06	5.05756e+06	4.51589e+06	4.19728e+06	5.05137e+06	6.63416e+06	4.31414e+06	4.39576e+06	4.6937e+06	7.30791e+06	5.33752e+06	5.90142e+06	4.68694e+06	4.5127e+06	5.67401e+06	6.87581e+06	5.49948e+06	5.60489e+06	5.56858e+06	4.45358e+06	7.11216e+06	7.6034e+06	6.38864e+06
GT1 t46:0_11.49	GT1 t46:0	11.49	C105 H187 N5 O48	8.31	2286.25	763.092	[M+3H]+3	283753	294297	255908	203096	375976	256509	573277	436262	365788	334245	484728	346861	348434	320578	282407	297386	223154	302028	188365	148635	140166	349766	199368	159978	181121	326893	333325	314260	320729	307448	324776	377262	345385	219321	180327	198945	186426	175840	312214	317101	324914	486927
GT1 t49:0_9.34	GT1 t49:0	9.34	C108 H193 N5 O48	5.8	2328.3	1165.15	[M+2H]+2	73228.4	101502	94139.3	77714.5	159959	82999.6	95035.2	72863.4	136702	125424	108120	86644.1	95349.1	89739.4	88231.3	92484.8	78534	75741.3	135892	167774	121725	83749.3	111174	104836	128452	96842.6	84113.7	92008	74677.7	72492.1	80944.1	81740.3	80352.1	156585	144624	125833	136233	129989	91671.1	122871	82332.4	99750.3
GT2 d33:0_26.82	GT2 d33:0	26.82	C86 H151 N5 O42	-4.4	1925.97	961.98	[M-2H]-2	457632	283096	506035	544394	452948	637043	358884	337922	979805	772294	704444	374468	371364	534697	439257	465697	633393	330306	316601	974275	366732	532697	381937	271019	596502	356240	322872	741525	378828	249109	608275	302652	365299	296477	339485	474448	480696	834075	492934	819615	494490	341461
GT2 d37:2_20.67	GT2 d37:2	20.67	C90 H155 N5 O42	-5.51	1978	990.009	[M+2H]+2	271962	247428	280170	216412	185501	174859	227223	196885	199377	297356	171226	216549	204021	165772	209639	188453	170318	202978	4.44131e+06	4.18887e+06	2.05231e+06	259203	4.34612e+06	7.13736e+06	4.92431e+06	252646	213552	607360	342039	1.24654e+06	641623	235340	221908	6.29277e+06	5.56573e+06	3.71197e+06	9.65027e+06	3.34885e+06	147218	176113	312152	190417
GT2 d38:1_14.67	GT2 d38:1	14.67	C91 H159 N5 O42	-7.58	1994.03	998.023	[M+2H]+2	86088.8	94629.7	123123	123449	108220	95730.3	128851	103715	119950	120169	104140	123067	119119	105222	121406	95369.4	102567	93426	177730	136345	119235	95315.6	98269.1	95311.5	141807	229144	107119	114569	122727	111897	123822	114970	99877.8	104872	94625.3	102663	119970	128443	104631	99230.2	103464	89561
GT2 d38:2_17.9	GT2 d38:2	17.9	C91 H157 N5 O42	3.34	1992.04	997.026	[M+2H]+2	3.34088e+06	2.40778e+06	3.18536e+06	3.00192e+06	3.78668e+06	3.98512e+06	3.48898e+06	2.39663e+06	2.45258e+06	2.21903e+06	3.48852e+06	2.37759e+06	2.95495e+06	2.7832e+06	2.6823e+06	3.13079e+06	2.9633e+06	2.7035e+06	2.38389e+06	3.23423e+06	3.25297e+06	2.89296e+06	2.97733e+06	2.51726e+06	2.76913e+06	2.5661e+06	2.59424e+06	2.52396e+06	2.82447e+06	2.95328e+06	3.3996e+06	2.42747e+06	2.9573e+06	2.47705e+06	2.60017e+06	2.52186e+06	2.22317e+06	2.85716e+06	2.57204e+06	2.60062e+06	3.09484e+06	2.48163e+06
GT2 d39:1_18.18	GT2 d39:1	18.18	C92 H161 N5 O42	0.66	2008.06	670.362	[M+3H]+3	609378	439181	501463	547552	690693	726888	432048	456863	447352	404752	636309	450531	538984	507658	489253	571057	545113	485061	434823	589926	593345	571472	475027	459149	505091	460616	473190	465035	515185	538679	620089	434489	539413	451815	396863	459989	405507	498321	469143	474355	564501	472582
GT2 d43:0_11.86	GT2 d43:0	11.86	C96 H171 N5 O42	-8.03	2066.12	689.715	[M+3H]+3	304401	337716	238282	160177	325468	292949	251995	266039	333996	296339	364075	279343	328672	344549	293686	275979	251706	266932	519447	616702	333870	277530	335107	213673	294941	283816	341920	313519	304100	293292	337481	279866	296277	199532	183872	182196	209926	168579	275285	302580	288587	367079
GT2 t34:1_28.2	GT2 t34:1	28.2	C87 H151 N5 O43	-3.39	1953.97	977.993	[M+2H]+2	339482	373912	838671	797541	512576	401761	403428	365536	814690	1.21787e+06	744497	331563	323808	394591	729825	594399	636452	529787	356045	553425	307741	317174	346590	385468	430708	542937	326452	874712	369007	334423	586872	254687	447200	304681	287995	340759	411978	472219	368812	760291	355051	340137
GT2 t37:1_14.03	GT2 t37:1	14.03	C90 H157 N5 O43	1.47	1996.03	999.021	[M+2H]+2	264266	293683	327525	534893	174093	281330	370326	245300	249494	407951	300593	262633	434125	336821	236041	454981	347047	339204	278112	369476	300194	356098	226490	288482	356140	442316	307790	410535	449647	317060	305054	323023	342171	237875	421618	330455	250713	293155	277568	416376	267267	239831
GT2 t39:2_20.18	GT2 t39:2	20.18	C92 H159 N5 O43	-5.08	2022.03	1012.02	[M+2H]+2	321229	315230	293314	456626	430690	330391	325279	361330	281351	266458	342382	408926	387587	242510	376671	323818	330357	418831	5.25014e+06	3.54853e+06	2.75714e+06	464251	5.07718e+06	6.99998e+06	4.54085e+06	387630	436370	430386	285920	410260	396832	512040	289529	9.14682e+06	6.10828e+06	5.71687e+06	8.59021e+06	3.93369e+06	258431	301974	426188	280427
GT2 t41:1_17.97	GT2 t41:1	17.97	C94 H165 N5 O43	1.53	2052.09	685.038	[M+3H]+3	309317	228329	340149	393804	320243	384535	333250	223438	270405	286389	307394	247015	298610	296649	319324	254072	363529	255172	274137	345211	297133	344822	309565	278988	377685	295771	268396	263894	305335	343243	326277	304536	276630	301854	286893	321725	341479	412314	279808	316710	324802	292261
GT2 t43:1_7.93	GT2 t43:1	7.93	C96 H169 N5 O43	7.82	2080.14	694.386	[M+3H]+3	38332.6	40914.3	44215.9	49367.1	56913.1	41438.9	67403.3	39565.1	45519.1	44068.8	46773	36765.1	43591.8	39975.5	39859.5	47869	33821.2	36120.2	48208.8	36713.1	45136.6	40771.6	48200.2	41195.2	45159.3	46095.5	45604.4	48155.2	55293.3	37487.7	41823.5	47282.7	41269.2	42327	46439	40293.1	43574.6	80112.3	38190.7	52405.9	40738	42494.1
GT2 t45:0_11.8	GT2 t45:0	11.8	C98 H175 N5 O43	-8.07	2110.15	704.39	[M+3H]+3	210336	287269	202688	131065	276851	249189	277287	226299	271317	252073	266434	206402	279576	293081	247846	226019	232670	203141	168313	130416	180619	234680	180874	170064	189756	204416	282233	230402	245980	249481	287069	208085	246484	413243	156406	154980	205383	143397	234163	255861	230673	250173
GT3 d30:0_15.45	GT3 d30:0	15.45	C75 H132 N4 O37	2.51	1680.86	1681.87	[M+H]+1	72748.4	70935.7	87177.7	77567.3	89018.1	95592.4	91166.6	79672.5	63018	58938.2	90075.4	63390.9	81434.7	67016.8	85667.5	73600	56730.9	64244	86977.9	83367.9	81930.3	65650.5	88974.3	280400	94718.7	96445.5	81879	78026.6	78708.3	80456	69236.9	60352.9	64258	352517	102928	101247	138469	111824	53456.1	62904.2	74431.6	80113.5
GT3 d33:0_24.66	GT3 d33:0	24.66	C78 H138 N4 O37	-3.41	1722.9	1723.91	[M+H]+1	334651	384297	592528	374600	1.41657e+06	683197	451489	637848	1.02448e+06	1.9997e+06	1.25957e+06	387031	481201	514502	581898	974015	506127	504012	247947	1.59978e+06	316234	358306	276311	357117	611241	699262	352784	1.58785e+06	576214	442799	1.16185e+06	257944	381533	620459	646866	428121	424169	774058	354131	1.26646e+06	539284	338014
GT3 d38:2_15.26	GT3 d38:2	15.26	C83 H144 N4 O37	-2.29	1788.95	895.481	[M+2H]+2	88132.3	90152.5	103345	84449.6	102718	98982.5	109818	101768	90993.7	84297.2	89471.2	82444.7	90251.9	93114.9	107724	106020	75119.8	110788	3.08661e+06	1.96248e+06	1.73487e+06	87482.8	1.04126e+06	1.71345e+06	2.192e+06	110327	79422	117635	91147.5	102770	83164.6	84966.6	83874.2	2.84858e+06	928351	2.21513e+06	1.90823e+06	2.51853e+06	84097.2	83637.8	88358.9	104398
GT3 t33:2_4.23	GT3 t33:2	4.23	C78 H134 N4 O38	-6.17	1734.86	579.293	[M+3H]+3	534925	532298	563963	667336	671090	584464	559708	485317	1.01406e+06	935852	545099	505180	1.32417e+06	522095	584488	685190	537839	470618	597595	629680	951887	566002	2.35893e+06	932157	1.68283e+06	2.37925e+06	2.68397e+06	555271	647742	1.68158e+06	700540	565931	518770	1.37761e+06	1.41496e+06	1.02733e+06	709378	720760	4.08914e+06	868310	1.05231e+06	1.06894e+06
GT3 t35:2_26.25	GT3 t35:2	26.25	C80 H138 N4 O38	-9.77	1762.88	882.448	[M+2H]+2	1.27442e+06	1.97759e+06	3.4151e+06	5.21736e+06	2.76243e+06	1.82288e+06	1.49394e+06	1.67016e+06	3.81876e+06	4.03056e+06	3.61518e+06	1.21088e+06	1.59841e+06	1.91153e+06	2.34363e+06	2.91786e+06	3.25489e+06	2.95429e+06	2.27404e+06	1.98356e+06	1.34781e+06	943920	1.56887e+06	1.77709e+06	2.25709e+06	2.94616e+06	1.37945e+06	3.81066e+06	1.50489e+06	1.9837e+06	2.65748e+06	1.50974e+06	1.67464e+06	1.38406e+06	1.40809e+06	1.59923e+06	2.2329e+06	2.35182e+06	1.47736e+06	3.83653e+06	1.55992e+06	1.57095e+06
GT3 t40:0_9.3	GT3 t40:0	9.3	C85 H152 N4 O38	-1.83	1837.01	919.51	[M+2H]+2	51670.9	60170.1	88431.2	58351.4	115790	61347.8	65967.4	141366	68538.5	67172.6	67716.7	111331	78656	67385.1	54024.3	74458	53451.6	52552.3	92285.1	204962	80101	55403.9	90679.6	82762.3	304664	123502	102120	58482.6	64100.3	131749	61798.8	70217.2	66931.6	85088.9	95250.6	82598.2	95960.4	122197	63331.4	67011	64877.3	63813.1
GT3 t41:1_26.1	GT3 t41:1	26.1	C86 H152 N4 O38	-2.9	1849	1850.01	[M+H]+1	736164	1.11569e+06	2.5009e+06	2.74502e+06	1.79118e+06	1.10375e+06	824802	1.04331e+06	2.27033e+06	2.30212e+06	2.17199e+06	570760	932948	1.31648e+06	1.66449e+06	1.80475e+06	1.77935e+06	1.44224e+06	1.34586e+06	1.27007e+06	756188	823843	1.41944e+06	930536	1.36433e+06	1.71196e+06	777641	2.39276e+06	976667	777067	1.5738e+06	758134	1.10628e+06	789085	748850	791933	1.12345e+06	1.26743e+06	733541	1.59768e+06	933938	873591
GT3 t41:2_26.93	GT3 t41:2	26.93	C86 H150 N4 O38	-0.22	1846.99	1845.98	[M-H]-1	569149	358120	700944	635640	709762	837313	493872	463682	1.26203e+06	1.10405e+06	935644	520547	533714	653427	619052	619091	774615	528030	454405	1.51198e+06	486690	653097	516936	400269	930667	534533	465477	1.04328e+06	454167	336472	864492	399119	471491	412941	406939	712971	745357	1.03716e+06	610043	1.41588e+06	609869	470883
GT3 t41:2_26.03	GT3 t41:2	26.03	C86 H150 N4 O38	1.26	1847	1848	[M+H]+1	1.46879e+06	2.22603e+06	3.90576e+06	4.71546e+06	2.57233e+06	1.89831e+06	1.64564e+06	1.8402e+06	4.52975e+06	4.59317e+06	4.33355e+06	1.11381e+06	1.55901e+06	1.83232e+06	3.04244e+06	3.60082e+06	2.93043e+06	2.39226e+06	2.10113e+06	2.2711e+06	1.25237e+06	1.43999e+06	2.16383e+06	1.33985e+06	1.87328e+06	3.41568e+06	1.11345e+06	4.77401e+06	1.94864e+06	1.46616e+06	3.14004e+06	1.29124e+06	2.20724e+06	1.47758e+06	1.15542e+06	1.46891e+06	2.22002e+06	2.52878e+06	1.46356e+06	3.04663e+06	1.52975e+06	1.74298e+06
GT3 t41:2_12.29	GT3 t41:2	12.29	C86 H150 N4 O38	1.73	1847	616.673	[M+3H]+3	291156	322643	282358	202371	381525	320608	400519	321347	404765	356184	419322	321320	323408	383703	313097	314302	317416	321096	425174	191853	119015	321585	227697	219096	227607	328055	926998	332963	389892	344990	335535	344647	328026	912231	368883	262725	411268	267977	296822	367773	359203	353736
HexCer d23:1_24.34	HexCer d23:1	24.34	C29 H55 N O8	0.93	545.393	546.401	[M+H]+1	6.78433e+06	1.19545e+07	1.07751e+07	1.07274e+07	6.79983e+06	9.47059e+06	1.00759e+07	1.24191e+07	1.2222e+07	1.04276e+07	1.01616e+07	3.88694e+06	1.66924e+07	1.14948e+07	8.57106e+06	1.78802e+07	1.34325e+07	7.25715e+06	3.12264e+09	2.66235e+09	3.21273e+09	1.02858e+07	3.67308e+09	2.83052e+08	5.36409e+09	1.26749e+07	1.16896e+07	1.27375e+07	2.31408e+07	7.98772e+06	1.25976e+07	6.59968e+06	8.36964e+06	2.00954e+09	9.91899e+08	2.60564e+09	4.11943e+09	4.81807e+09	7.62747e+06	1.0257e+07	1.68565e+07	1.16454e+07
HexCer d26:2_11.23	HexCer d26:2	11.23	C32 H59 N O8	0.61	585.424	586.432	[M+H]+1	396908	255271	670929	912633	278208	233357	506279	254367	448734	639387	234772	699680	1.3028e+06	638904	374527	1.26306e+06	780402	701339	339932	497844	427271	615627	261655	586959	516963	711338	416033	546122	695172	625707	622635	902628	332606	497208	752531	561276	330978	425830	325528	1.25746e+06	317518	335488
HexCer d27:2_22.94	HexCer d27:2	22.94	C33 H61 N O8	-1.9	599.439	600.446	[M+H]+1	818516	998542	3.62881e+06	1.31989e+06	1.39234e+06	1.11195e+06	3.46703e+06	1.66924e+06	1.38239e+06	1.45255e+06	1.58266e+06	738538	888956	763136	1.05994e+06	1.21551e+06	967778	1.0895e+07	4.23488e+06	981820	1.02046e+06	921094	1.1813e+06	2.12581e+06	1.9925e+06	2.2176e+06	2.0093e+06	2.0837e+06	999132	864573	1.22999e+06	4.22978e+06	1.286e+06	1.25906e+06	1.04073e+06	1.09841e+06	860967	909592	758644	1.24944e+06	1.0187e+06	957129
HexCer d30:1_21.61	HexCer d30:1	21.61	C36 H69 N O8	4.23	643.505	644.512	[M+H]+1	109639	90296.4	128006	159246	91089.9	90915.7	100460	102620	176554	128905	171334	191329	90833.6	90177.9	81323.9	81224.5	112251	92167.9	229015	158596	161981	128168	147635	155395	205020	92180.3	88388.3	136441	111003	90582.4	129864	90471.7	97780.8	201822	119622	161747	156723	132122	101839	161770	149793	112837
HexCer d31:0_33.41	HexCer d31:0	33.41	C37 H73 N O8	3.19	659.536	660.543	[M+H]+1	780029	784857	1.61593e+06	4.10982e+07	1.04684e+06	709053	1.42028e+06	680603	1.13346e+07	1.15861e+06	1.04338e+06	684368	823915	640668	643901	934630	851883	1.49195e+07	4.0828e+06	1.31005e+06	773218	897626	591841	1.16558e+06	831566	939795	834088	1.53583e+06	1.17026e+06	1.15258e+06	858219	757684	2.17986e+06	840943	754570	709756	1.32258e+06	732994	985926	1.98276e+06	741382	844510
HexCer d31:2_29.19	HexCer d31:2	29.19	C37 H69 N O8	0.12	655.502	654.495	[M-H]-1	110677	104478	1.2427e+06	147462	155455	111149	868006	98700.4	176009	428515	169894	130952	132912	138581	92934.1	375061	212135	111231	97899.5	192038	105715	393243	158917	81701.2	189262	1.87149e+06	97535.2	480116	236728	99180.1	509831	93578.5	122721	95982.4	92953	117721	122101	156244	153546	803257	151172	222984
HexCer d32:1_23	HexCer d32:1	23	C38 H73 N O8	0.66	671.534	672.541	[M+H]+1	1.94613e+07	1.66342e+07	1.07124e+06	1.882e+07	1.63928e+07	1.72698e+07	1.69148e+07	1.77176e+07	1.64345e+07	2.17758e+07	1.86835e+07	1.56122e+07	1.42165e+07	1.78102e+07	1.67273e+07	1.63063e+07	1.72068e+07	6.50059e+06	1.09319e+07	1.98964e+07	1.54024e+07	1.40325e+07	1.38767e+07	1.49336e+07	2.27562e+07	2.72311e+06	2.10694e+07	2.50504e+07	1.52038e+07	1.78923e+07	1.12826e+07	1.50763e+07	1.69658e+07	1.57563e+07	1.17143e+07	1.52977e+07	1.40255e+07	2.22863e+07	1.43309e+07	1.53774e+07	2.28134e+07	1.58416e+07
HexCer d32:2_22.43	HexCer d32:2	22.43	C38 H71 N O8	2.22	669.519	670.527	[M+H]+1	248233	272451	246335	255272	900711	383566	424153	352682	370683	770232	1.04754e+06	179657	179484	239342	384310	355955	267522	247982	196455	417139	265946	211948	206280	246106	430930	252077	226869	580458	748417	205890	355810	202431	780136	330127	236380	329791	193785	217737	173450	333042	269856	204545
HexCer d33:1_23.94	HexCer d33:1	23.94	C39 H75 N O8	0.47	685.55	686.557	[M+H]+1	1.64017e+06	680417	1.08548e+06	1.01394e+06	1.10873e+06	716280	9.27849e+06	6.97934e+06	7.17486e+06	1.35538e+06	1.23449e+06	576132	709780	7.06483e+06	6.0668e+07	2.17062e+07	2.17097e+06	592206	851701	5.25346e+07	789909	602559	501664	2.38546e+07	780940	1.3162e+07	1.94498e+07	2.97364e+06	686042	1.13136e+07	2.84786e+06	868180	8.24491e+06	1.67625e+07	641754	749023	753405	2.45846e+07	490071	1.80861e+06	836958	643215
HexCer d33:2_23.71	HexCer d33:2	23.71	C39 H73 N O8	1.52	683.535	684.542	[M+H]+1	358744	671119	411170	1.07344e+06	543920	380281	539174	549103	506637	612294	424846	278959	361117	313422	353825	727125	361091	718927	315773	403064	335653	313576	215995	361436	766056	481324	266163	1.42171e+06	2.17143e+06	487211	956029	336145	511700	356802	323104	527852	701689	402611	308353	818607	381429	416447
HexCer d33:2_30.81	HexCer d33:2	30.81	C39 H73 N O8	5.23	683.537	682.53	[M-H]-1	197672	1.0779e+06	1.61176e+06	1.4373e+06	498775	219767	1.3344e+06	183429	1.72544e+06	708270	246061	423996	588377	366894	488176	250192	836045	1.17722e+06	814120	607887	168188	942248	439698	164447	499778	2.09636e+06	148802	712902	1.07648e+06	532154	902011	373012	596850	213966	518267	829643	754871	202481	221918	875080	562082	682562
HexCer d34:1_23.27	HexCer d34:1	23.27	C40 H77 N O8	0.21	699.565	700.572	[M+H]+1	3.77169e+06	2.32664e+06	1.16996e+06	981180	7.32346e+06	4.22001e+06	1.67658e+06	2.52717e+06	5.75522e+06	6.39795e+06	6.99328e+06	1.33977e+06	1.02069e+06	2.24248e+06	5.30872e+06	7.90385e+06	1.27963e+06	2.65588e+06	691267	6.89385e+06	2.76688e+06	1.39204e+06	1.01346e+06	4.89348e+06	2.83775e+06	2.16189e+06	2.6327e+06	7.01509e+06	5.09552e+06	2.83958e+06	1.74661e+06	4.40038e+06	2.43034e+06	8.14522e+06	2.60318e+06	4.75394e+06	4.44146e+06	2.33485e+06	3.20311e+06	4.12302e+06	4.36735e+06	1.02304e+06
HexCer d34:1_25.68	HexCer d34:1	25.68	C40 H77 N O8	0.63	699.565	700.572	[M+H]+1	9.11808e+07	8.57972e+07	7.75546e+07	6.16462e+07	5.12988e+07	5.31172e+07	1.07463e+08	8.17931e+07	8.11337e+07	5.51452e+07	7.33251e+07	3.32238e+07	1.14099e+08	8.47339e+07	6.31411e+07	9.53736e+07	1.15699e+08	5.66631e+07	5.57487e+07	1.16049e+08	8.23969e+07	1.17899e+08	4.75108e+07	5.68747e+07	1.14638e+08	1.24964e+08	1.43498e+08	1.0125e+08	2.16702e+08	8.33223e+07	1.40229e+08	7.21649e+07	7.95677e+07	8.84597e+07	8.05366e+07	1.18412e+08	1.37786e+08	1.21469e+08	7.10455e+07	6.20804e+07	1.21784e+08	5.52283e+07
HexCer d34:1_24.98	HexCer d34:1	24.98	C40 H77 N O8	0.94	699.566	700.573	[M+H]+1	1.16421e+06	1.37722e+06	2.13457e+06	1.97145e+06	2.40789e+06	1.59809e+06	2.97591e+06	2.38806e+06	1.99653e+06	3.85241e+06	2.57316e+06	890826	972836	5.05421e+06	3.34101e+07	7.40314e+06	1.21677e+06	1.32276e+06	1.26918e+06	2.44888e+07	1.27604e+06	780946	1.06541e+06	1.5425e+07	1.06916e+06	4.12602e+06	1.12252e+07	3.29693e+06	1.48836e+06	5.16381e+06	1.60315e+06	701735	5.12775e+06	2.68236e+06	876895	1.39451e+06	841104	1.45604e+07	657722	1.77067e+06	862841	1.24086e+06
HexCer d35:0_27.71	HexCer d35:0	27.71	C41 H81 N O8	1.18	715.597	716.604	[M+H]+1	7.36327e+06	7.06717e+06	5.8568e+06	6.00008e+06	7.00037e+06	7.7227e+06	6.99271e+06	6.91253e+06	8.20168e+06	7.34704e+06	7.29672e+06	6.2123e+06	7.70417e+06	7.55362e+06	6.76397e+06	6.89662e+06	6.55824e+06	5.83387e+06	6.25219e+06	6.57811e+06	7.1676e+06	7.23162e+06	6.06467e+06	6.82325e+06	6.22589e+06	6.2313e+06	6.73674e+06	7.84269e+06	7.04806e+06	6.227e+06	7.39183e+06	7.65169e+06	8.14672e+06	7.03981e+06	6.49052e+06	6.14518e+06	8.28388e+06	8.36746e+06	6.85538e+06	8.08301e+06	6.99571e+06	6.73009e+06
HexCer d35:2_34.49	HexCer d35:2	34.49	C41 H77 N O8	0.57	711.565	712.573	[M+H]+1	907213	1.15563e+06	7.12788e+06	1.60705e+06	1.07463e+06	1.4063e+06	498466	1.22565e+06	1.03293e+06	1.1135e+06	1.39049e+06	1.46844e+06	1.71721e+06	997939	793296	1.70631e+06	1.4469e+06	1.26179e+06	1.12478e+06	2.35578e+06	1.28074e+06	5.98717e+06	2.11449e+06	2.22424e+06	2.73338e+06	3.61853e+06	1.07511e+06	1.89507e+06	3.59965e+06	513273	1.48296e+07	548329	1.02286e+06	3.07029e+06	1.44762e+06	2.33787e+06	2.15925e+06	764614	560831	1.32197e+06	1.25837e+06	8.84077e+06
HexCer d35:3_30.92	HexCer d35:3	30.92	C41 H75 N O8	9.1	709.556	708.548	[M-H]-1	144262	1.02381e+06	1.28737e+06	1.04282e+06	341070	200393	1.05048e+06	348383	921707	1.14666e+06	255018	590930	448538	534903	394489	352203	1.17458e+06	918895	503409	662200	178994	810891	574510	171993	579191	2.21684e+06	168534	712024	1.03332e+06	852815	1.19311e+06	383148	225974	384053	400750	1.0174e+06	831638	326392	615007	2.00832e+06	719890	942840
HexCer d35:4_29.24	HexCer d35:4	29.24	C41 H73 N O8	8.26	707.539	706.532	[M-H]-1	468033	2.18109e+06	1.84083e+06	1.74594e+06	956442	423252	3.22392e+06	1.23766e+06	1.5729e+06	1.28923e+06	1.08996e+06	1.83892e+06	1.32306e+06	1.2902e+06	890029	1.5404e+06	2.12894e+06	1.13693e+06	1.16801e+06	1.57133e+06	737062	1.74173e+06	1.3087e+06	958271	1.29348e+06	3.4516e+06	936306	1.49618e+06	1.32374e+06	1.41512e+06	2.59343e+06	399642	356794	974747	1.07348e+06	1.57386e+06	1.41551e+06	1.30461e+06	1.55178e+06	4.08113e+06	1.68383e+06	2.92068e+06
HexCer d35:5_2.45	HexCer d35:5	2.45	C41 H71 N O8	-4.38	705.515	706.522	[M+H]+1	5.04141e+07	4.74583e+07	6.48974e+07	5.37132e+07	5.32641e+07	5.08362e+07	3.91997e+07	4.70727e+07	6.41004e+07	3.87156e+07	6.53525e+07	4.43844e+07	4.31157e+07	4.90447e+07	4.71078e+07	5.40861e+07	4.26736e+07	3.89289e+07	359772	296339	301768	6.43918e+07	381637	414493	305037	4.23013e+07	4.43617e+07	5.25866e+07	6.03698e+07	5.03844e+07	6.18549e+07	4.13936e+07	7.08438e+07	362769	321263	313051	429873	274494	3.93918e+07	5.20494e+07	6.10579e+07	5.1998e+07
HexCer d36:1_27.99	HexCer d36:1	27.99	C42 H81 N O8	-0.77	727.596	728.604	[M+H]+1	1.51852e+07	1.80282e+07	1.48545e+07	1.89383e+07	1.17999e+07	2.58731e+07	1.35291e+07	1.19042e+07	1.86869e+07	2.48741e+07	1.78514e+07	1.14196e+07	1.94177e+07	1.45559e+07	1.73748e+07	2.01971e+07	1.91131e+07	1.55633e+07	1.17585e+07	2.13222e+07	1.6103e+07	1.53018e+07	1.33956e+07	1.3453e+07	2.18024e+07	2.14575e+07	1.6157e+07	3.9596e+07	3.06238e+07	1.2211e+07	3.92514e+07	1.37907e+07	1.55424e+07	2.18066e+07	1.64893e+07	2.10013e+07	1.67296e+07	1.87261e+07	1.36459e+07	1.9283e+07	2.27858e+07	1.1198e+07
HexCer d36:1_23.84	HexCer d36:1	23.84	C42 H81 N O8	-0.11	727.596	728.603	[M+H]+1	704858	604199	904297	742200	1.27046e+06	655173	764213	481345	1.07724e+06	1.14365e+06	947293	487112	543451	423665	711287	1.32519e+06	577904	493358	495045	559049	698993	501982	326583	696048	555391	597155	504328	2.47435e+06	481170	565896	421755	614768	329027	934443	542130	499584	456911	535595	408271	1.29054e+06	465998	457361
HexCer d36:1_25.54	HexCer d36:1	25.54	C42 H81 N O8	1	727.597	728.604	[M+H]+1	8.84933e+06	9.02463e+06	9.723e+06	1.07132e+07	1.2721e+07	9.23806e+06	6.97463e+06	6.27901e+06	1.20066e+07	1.21717e+07	1.21106e+07	6.50935e+06	6.77204e+06	8.17946e+06	8.0781e+06	1.03516e+07	8.26533e+06	8.68934e+06	9.63774e+06	1.08755e+07	8.45892e+06	7.12887e+06	6.82327e+06	6.91565e+06	7.71558e+06	8.785e+06	7.10548e+06	1.3799e+07	1.0553e+07	7.95437e+06	8.42956e+06	7.83362e+06	6.51701e+06	7.24296e+06	7.19131e+06	7.01336e+06	6.85642e+06	7.54701e+06	9.21492e+06	1.08846e+07	8.6502e+06	7.22756e+06
HexCer d36:1_22.7	HexCer d36:1	22.7	C42 H81 N O8	2.46	727.598	728.605	[M+H]+1	132320	155825	178809	169234	164412	153212	178907	146330	204278	178518	177289	137855	183070	139338	142750	149944	147967	157536	153535	176821	165396	170509	182334	154688	273219	272090	153999	232511	159380	144024	149842	130845	166740	149133	149319	160923	168786	173269	147091	179208	159783	183576
HexCer d36:2_25.85	HexCer d36:2	25.85	C42 H79 N O8	0.66	725.581	726.588	[M+H]+1	1.01962e+06	1.59759e+06	1.3623e+06	2.17143e+06	1.91012e+06	1.21321e+06	1.08202e+06	660681	1.19179e+06	2.6894e+06	2.00444e+06	604416	1.35129e+06	1.6434e+06	2.64928e+06	1.54931e+06	3.12911e+06	1.90301e+06	781663	3.87703e+06	1.69115e+06	697757	730269	1.03612e+06	2.6564e+06	1.09342e+06	904021	2.93136e+06	3.60109e+06	1.02331e+06	3.70681e+06	1.1225e+06	666333	2.96112e+06	1.39711e+06	2.48838e+06	657443	1.73121e+06	695339	1.51085e+06	1.6733e+06	647359
HexCer d36:4_25.72	HexCer d36:4	25.72	C42 H75 N O8	-3.25	721.547	722.554	[M+H]+1	9.60918e+07	7.76614e+07	9.51401e+07	7.20875e+07	2.92334e+07	5.75454e+07	1.13571e+08	8.3539e+07	5.78978e+07	2.71821e+07	4.97403e+07	4.58044e+07	1.14759e+08	9.82631e+07	5.7722e+07	4.53488e+07	1.28651e+08	7.39535e+07	5.0238e+07	8.84507e+07	6.44357e+07	1.36848e+08	7.26833e+07	7.21334e+07	1.39008e+08	9.29586e+07	1.47826e+08	4.44668e+07	1.76493e+08	7.28298e+07	1.65334e+08	8.40106e+07	1.05736e+08	9.17321e+07	8.28628e+07	1.25142e+08	1.37797e+08	1.00811e+08	8.40437e+07	3.54098e+07	1.47834e+08	7.8229e+07
HexCer d36:5_28.23	HexCer d36:5	28.23	C42 H73 N O8	-0.04	719.534	720.542	[M+H]+1	412519	515680	886965	1.18153e+06	579194	522595	457035	426894	870166	1.18484e+06	941186	322570	358724	452687	712278	782617	817696	542340	401288	543220	299395	347682	376340	408728	520106	802733	359245	1.0873e+06	472672	497215	570955	345397	435071	398451	297713	701542	1.39153e+06	694356	395932	1.01497e+06	500093	388641
HexCer d37:2_14.24	HexCer d37:2	14.24	C43 H81 N O8	9.76	739.603	740.611	[M+H]+1	95791.4	175597	629487	164087	63907.8	80016.7	598091	62845.3	304095	104504	83803.1	235794	102300	84859.2	163756	121099	189277	93057.7	201057	86841	109617	110869	75151.5	88094.6	119388	205113	165041	351053	119702	147752	314155	78524.9	102215	243386	94242.3	229136	91697.1	216044	86204.1	222088	74361.2	186463
HexCer d37:5_3.71	HexCer d37:5	3.71	C43 H75 N O8	-4.51	733.546	734.553	[M+H]+1	5.07582e+07	5.21126e+07	6.3823e+07	6.27421e+07	5.05468e+07	5.85974e+07	5.08374e+07	5.71254e+07	7.12807e+07	5.37959e+07	6.79783e+07	5.87089e+07	5.74569e+07	6.06303e+07	4.63125e+07	6.00602e+07	4.89331e+07	4.76845e+07	107869	195336	123326	7.25038e+07	97007	111044	104676	4.93604e+07	5.30749e+07	6.38735e+07	6.29776e+07	5.80214e+07	7.29985e+07	4.9348e+07	5.94684e+07	156303	99518.1	88431.2	90645.4	87374.5	4.26933e+07	5.77844e+07	6.87013e+07	7.41564e+07
HexCer d37:7_11.86	HexCer d37:7	11.86	C43 H71 N O8	-8.84	729.512	730.519	[M+H]+1	444547	416335	208231	376925	892628	586912	584444	137516	986474	1.61185e+06	203242	334881	225308	329241	586245	838162	421287	461076	596913	495835	398867	697241	478247	1.70253e+06	577428	200944	183012	1.21108e+06	3.67564e+06	1.08498e+06	228868	731425	334001	345622	478161	237776	460127	425831	1.04547e+06	1.41543e+06	89131	532071
HexCer d38:0_30.98	HexCer d38:0	30.98	C44 H87 N O8	1.03	757.644	758.651	[M+H]+1	454608	1.07086e+06	2.08614e+06	1.60752e+06	541975	330622	1.2147e+06	604235	1.33164e+06	1.04379e+06	566156	720761	739923	711132	689883	489100	1.34445e+06	1.17997e+06	947175	722239	500527	884348	869737	458289	825078	1.73642e+06	440771	688323	1.24277e+06	791357	1.35313e+06	621045	654631	656503	698970	1.19683e+06	901928	604713	699723	1.15232e+06	1.01326e+06	965559
HexCer d38:1_27.66	HexCer d38:1	27.66	C44 H85 N O8	0.48	755.628	756.635	[M+H]+1	7.40884e+06	7.11091e+06	5.91386e+06	6.03722e+06	7.0437e+06	7.77049e+06	7.03599e+06	6.95531e+06	8.25244e+06	7.3925e+06	7.34188e+06	6.25074e+06	7.75185e+06	7.60036e+06	6.80583e+06	6.9393e+06	6.59882e+06	5.86997e+06	6.32401e+06	6.61882e+06	7.21195e+06	7.27638e+06	7.17018e+06	6.86547e+06	6.26442e+06	6.26987e+06	6.77843e+06	7.89123e+06	7.09168e+06	6.26554e+06	7.43758e+06	7.69905e+06	8.19714e+06	7.08337e+06	6.53069e+06	6.18321e+06	8.33515e+06	8.41924e+06	6.92859e+06	8.13303e+06	7.08966e+06	6.77174e+06
HexCer d38:1_30.18	HexCer d38:1	30.18	C44 H85 N O8	0.9	755.628	756.635	[M+H]+1	1.53843e+07	1.42455e+07	1.8497e+07	1.70149e+07	7.85657e+06	9.81324e+06	1.54637e+07	1.36938e+07	2.56825e+07	1.72854e+07	1.74295e+07	8.84978e+06	1.71352e+07	1.47338e+07	1.23406e+07	1.43527e+07	2.31916e+07	1.66551e+07	1.20767e+07	2.28253e+07	1.2983e+07	1.1061e+07	1.17923e+07	1.09725e+07	2.67934e+07	1.30846e+07	1.20679e+07	3.66645e+07	2.92765e+07	1.33682e+07	2.76949e+07	1.26457e+07	1.52723e+07	1.67479e+07	1.45706e+07	2.4326e+07	1.45211e+07	2.13571e+07	1.29523e+07	1.88507e+07	3.41277e+07	1.1897e+07
HexCer d38:2_27.91	HexCer d38:2	27.91	C44 H83 N O8	1.66	753.613	754.622	[M+H]+1	4.52037e+06	4.62909e+06	5.69173e+06	4.51163e+06	6.78574e+06	4.32051e+06	4.41215e+06	3.08807e+06	6.08857e+06	6.97092e+06	6.01158e+06	3.33976e+06	3.98138e+06	3.49665e+06	5.86187e+06	5.74734e+06	4.78804e+06	4.27207e+06	3.57213e+06	6.04088e+06	4.40522e+06	4.08779e+06	3.28034e+06	4.67473e+06	5.1379e+06	5.24787e+06	3.972e+06	8.11201e+06	4.21755e+06	4.46499e+06	4.78167e+06	3.5429e+06	2.99337e+06	2.84096e+06	4.0154e+06	3.43244e+06	4.13601e+06	4.09524e+06	4.01416e+06	7.75105e+06	4.24525e+06	3.42613e+06
HexCer d38:2_28.22	HexCer d38:2	28.22	C44 H83 N O8	1.96	753.613	754.62	[M+H]+1	1.59261e+06	1.82617e+06	2.00584e+06	1.46338e+06	940751	1.30742e+06	1.77717e+06	1.3761e+06	1.88471e+06	1.59535e+06	1.26709e+06	803942	2.07869e+06	1.88193e+06	1.68161e+06	2.41316e+06	3.50851e+06	1.35542e+06	803969	3.53883e+06	1.62103e+06	1.15879e+06	1.61799e+06	1.57742e+06	3.05498e+06	2.29298e+06	1.07662e+06	4.59933e+06	3.15847e+06	1.13821e+06	3.29066e+06	1.51799e+06	1.61757e+06	4.9934e+06	1.47272e+06	2.6407e+06	1.13309e+06	2.28282e+06	1.34122e+06	2.19981e+06	3.50687e+06	941034
HexCer d38:5_26.26	HexCer d38:5	26.26	C44 H77 N O8	6.98	747.57	748.577	[M+H]+1	2.92482e+06	1.38098e+07	1.825e+07	3.54148e+07	3.53499e+07	9.16049e+06	5.2454e+06	6.67291e+06	2.28439e+07	5.62611e+07	1.67892e+07	4.89925e+06	4.18483e+06	9.19713e+06	1.95901e+07	1.58731e+07	1.8051e+07	2.54787e+07	2.02274e+07	1.15669e+07	8.14199e+06	2.01981e+06	5.53045e+06	3.22373e+06	1.46408e+07	1.33247e+07	4.55246e+06	4.39577e+07	9.32057e+06	6.35976e+06	1.73094e+07	2.06357e+07	7.48725e+06	1.1379e+07	4.69915e+06	8.40126e+06	6.41967e+06	5.82057e+06	4.06795e+06	1.70893e+07	8.02462e+06	7.96868e+06
HexCer d38:6_24.39	HexCer d38:6	24.39	C44 H75 N O8	5.66	745.553	746.561	[M+H]+1	1.14126e+07	2.88796e+07	3.50972e+07	2.69917e+07	5.23776e+07	1.43535e+07	1.5533e+07	1.68376e+07	2.98686e+07	6.812e+07	3.37266e+07	7.63391e+06	1.27419e+07	2.33232e+07	1.99179e+07	3.92673e+07	2.27969e+07	2.82951e+07	2.8263e+07	3.23757e+07	1.80867e+07	8.64482e+06	1.07335e+07	1.04008e+07	2.94758e+07	1.95287e+07	1.4794e+07	1.30279e+08	3.10275e+07	9.65441e+06	2.85085e+07	1.90596e+07	1.13277e+07	9.88007e+06	8.87947e+06	1.41133e+07	1.29291e+07	1.28872e+07	1.08871e+07	3.06887e+07	2.01955e+07	1.50683e+07
HexCer d39:1_31.19	HexCer d39:1	31.19	C45 H87 N O8	1.98	769.645	770.651	[M+H]+1	3.98123e+06	4.4042e+06	6.23498e+06	5.65578e+06	3.11236e+06	3.27181e+06	5.21505e+06	4.02472e+06	7.62212e+06	6.74227e+06	3.4689e+06	1.83778e+06	7.35361e+06	4.75054e+06	2.78526e+06	4.78708e+06	7.75223e+06	5.39008e+06	3.95088e+06	7.12169e+06	3.33672e+06	3.86242e+06	2.83776e+06	2.80786e+06	9.35783e+06	5.25412e+06	2.75602e+06	1.43172e+07	9.91069e+06	3.08226e+06	9.18386e+06	3.7035e+06	6.35001e+06	2.75267e+06	4.26105e+06	8.99657e+06	5.71515e+06	7.2742e+06	3.40416e+06	5.63883e+06	1.04497e+07	3.72592e+06
HexCer d39:4_29.75	HexCer d39:4	29.75	C45 H81 N O8	-3.05	763.594	762.587	[M-H]-1	497116	372152	602803	588825	747743	812756	405747	422981	718658	670793	963428	312251	385742	608760	412161	623791	624785	461092	320045	1.2616e+06	518285	377945	505231	465972	707243	1.33376e+06	429963	723207	707934	368289	611219	407738	394936	768760	475173	373166	432378	660251	547687	904998	464277	428126
HexCer d39:5_16.3	HexCer d39:5	16.3	C45 H79 N O8	-4.59	761.577	762.584	[M+H]+1	104915	109069	69424.4	67318.3	68342.4	113185	73292.9	70752.2	67295.1	110117	83603.1	59855.3	128954	62489.9	95272.9	139572	53272.8	191237	144826	138231	98636.9	96991.4	79903.9	131454	108696	134739	66241.8	116939	101362	106253	55797.4	80163	70176.2	150594	183532	157540	116304	105425	61092	98016.2	83479	61512.2
HexCer d39:5_10.12	HexCer d39:5	10.12	C45 H79 N O8	-2.72	761.578	762.586	[M+H]+1	143825	251980	109518	179635	460605	599967	718322	197604	699921	246190	465089	304340	251689	785759	341373	325798	1.12634e+06	398190	324824	176747	342611	2.20662e+06	2.01245e+06	725793	225884	98567.1	231502	334820	1.00817e+06	476078	200823	391872	179292	311065	321306	221882	302428	243566	725742	319332	49221.3	164139
HexCer d39:5_29.42	HexCer d39:5	29.42	C45 H79 N O8	5.01	761.584	762.592	[M+H]+1	741255	876263	1.29556e+06	1.67503e+06	1.81262e+06	1.20748e+06	873903	709357	1.18765e+06	1.80488e+06	1.76014e+06	692144	780315	816440	1.31653e+06	1.2199e+06	1.2119e+06	1.05188e+06	685961	1.60275e+06	748032	599658	618344	891580	1.26518e+06	1.31337e+06	682393	2.20979e+06	1.22192e+06	746002	1.65852e+06	638797	749122	1.93474e+06	712397	979375	776481	854382	1.1995e+06	2.26816e+06	907178	981758
HexCer d39:7_23.94	HexCer d39:7	23.94	C45 H75 N O8	4.54	757.553	758.56	[M+H]+1	1.14831e+07	2.60385e+07	1.25554e+07	1.54683e+07	1.91563e+07	1.11371e+07	2.92054e+07	7.92824e+06	2.13668e+07	3.61773e+07	1.22627e+07	4.84414e+06	1.16667e+07	5.57874e+06	1.88533e+07	2.12774e+07	1.12577e+07	1.09901e+07	3.89922e+06	9.42325e+06	1.06179e+07	5.10453e+06	4.9517e+06	6.66104e+06	1.62456e+07	1.5055e+07	1.18817e+07	2.10819e+08	1.72864e+07	7.92637e+06	1.6535e+07	3.63843e+07	1.53074e+07	1.05579e+07	1.75209e+07	5.50664e+06	8.33388e+06	1.17164e+07	4.4485e+06	7.14513e+07	1.51716e+07	1.05195e+06
HexCer d39:7_24.31	HexCer d39:7	24.31	C45 H75 N O8	4.59	757.553	758.56	[M+H]+1	4.82923e+06	2.29373e+07	2.5339e+07	9.54251e+07	1.7308e+07	8.78003e+06	5.45356e+06	1.05154e+07	3.43944e+07	2.76293e+07	2.00435e+07	3.48736e+06	5.27112e+06	6.45159e+06	1.21553e+07	1.78194e+07	3.30579e+07	3.67443e+07	1.79132e+07	1.14736e+07	5.60152e+06	5.4004e+06	7.83377e+06	1.1655e+07	1.12494e+07	5.4735e+07	5.19643e+06	4.37558e+07	9.46031e+06	7.73338e+06	2.1338e+07	7.8922e+06	1.31249e+07	2.25341e+07	4.70902e+06	6.09769e+06	9.47246e+06	1.34368e+07	3.5164e+06	4.4003e+07	5.41953e+06	1.86528e+07
HexCer d40:2_31.7	HexCer d40:2	31.7	C46 H87 N O8	0.51	781.644	782.651	[M+H]+1	3.91565e+07	4.24405e+07	4.60011e+07	2.19045e+07	7.94272e+06	2.68387e+07	2.03013e+07	6.07626e+07	4.49799e+07	4.36763e+07	1.35699e+07	1.17684e+07	3.24063e+07	1.5368e+07	1.05941e+07	3.49324e+07	2.61181e+07	3.02688e+07	2.21934e+07	6.81645e+07	3.20068e+07	1.98173e+07	1.19587e+07	6.66899e+07	6.92008e+07	2.96646e+07	2.41355e+07	5.85811e+07	7.33269e+07	3.17193e+07	2.92093e+07	3.13229e+07	4.22159e+07	2.89303e+07	3.74811e+07	2.23106e+07	2.38407e+07	4.70618e+07	2.14601e+07	5.58275e+07	1.51583e+07	2.05088e+07
HexCer d40:2_30.33	HexCer d40:2	30.33	C46 H87 N O8	0.99	781.644	782.651	[M+H]+1	1.64503e+07	1.58524e+07	3.32059e+07	1.81417e+07	1.1529e+07	1.09381e+07	1.41735e+07	1.43332e+07	1.93261e+07	1.11414e+07	1.64797e+07	4.90307e+06	1.67123e+07	1.34785e+07	1.14057e+07	1.64814e+07	3.73973e+07	1.95136e+07	1.19244e+07	4.02685e+07	2.11211e+07	1.49003e+07	8.93868e+06	1.59217e+07	1.9825e+07	1.54016e+07	9.46553e+06	4.6236e+07	2.54024e+07	1.93933e+07	2.27733e+07	1.72738e+07	9.16144e+06	2.71551e+07	1.5806e+07	2.14569e+07	1.79662e+07	1.46419e+07	1.08243e+07	2.36096e+07	2.01476e+07	1.61146e+07
HexCer d40:5_28.49	HexCer d40:5	28.49	C46 H81 N O8	4.74	775.6	776.607	[M+H]+1	6.31583e+06	1.69403e+07	3.18388e+07	4.95947e+07	4.23336e+07	1.67091e+07	8.60287e+06	7.66507e+06	2.1384e+07	6.47998e+07	3.57629e+07	1.79127e+07	6.02318e+06	1.65334e+07	3.66639e+07	3.65589e+07	1.96786e+07	3.24862e+07	2.04009e+07	2.43961e+07	1.28146e+07	4.35218e+06	2.0481e+07	8.23752e+06	2.06677e+07	1.5052e+07	7.82649e+06	5.21939e+07	1.53146e+07	1.03587e+07	2.2038e+07	1.99082e+07	8.47758e+06	1.63845e+07	7.85493e+06	1.57533e+07	1.46161e+07	1.4612e+07	8.10104e+06	3.00881e+07	1.18021e+07	2.10404e+07
HexCer d41:0_27.56	HexCer d41:0	27.56	C47 H93 N O8	1.78	799.692	798.684	[M-H]-1	7.8497e+06	8.13132e+06	6.14297e+06	7.38032e+06	8.0916e+06	8.20855e+06	7.3713e+06	8.12129e+06	8.35859e+06	8.32371e+06	8.21349e+06	7.71491e+06	8.10025e+06	7.84179e+06	8.76113e+06	7.76898e+06	8.18196e+06	7.69785e+06	8.22854e+06	8.0489e+06	7.99938e+06	7.63112e+06	7.92975e+06	6.49494e+06	8.06194e+06	7.6006e+06	7.71295e+06	7.63069e+06	8.08803e+06	8.22232e+06	7.69763e+06	7.63407e+06	7.89789e+06	8.15764e+06	7.76672e+06	7.7965e+06	8.04928e+06	8.00985e+06	7.80998e+06	7.9769e+06	8.85163e+06	7.67937e+06
HexCer d41:1_29.27	HexCer d41:1	29.27	C47 H91 N O8	-0.36	797.674	798.681	[M+H]+1	704596	1.71567e+06	2.5627e+06	1.5486e+06	864053	598161	3.11886e+06	1.30971e+06	1.58645e+06	1.59994e+06	767543	1.6705e+06	1.45409e+06	1.448e+06	1.16885e+06	1.3101e+06	1.90055e+06	1.36136e+06	1.30699e+06	1.32175e+06	867643	2.11355e+06	1.29184e+06	1.06762e+06	1.27557e+06	3.06438e+06	1.07163e+06	1.54868e+06	1.90552e+06	1.27838e+06	1.67574e+06	717470	705374	988301	1.00191e+06	1.80178e+06	1.1939e+06	1.15541e+06	1.2667e+06	2.45865e+06	1.58868e+06	2.28184e+06
HexCer d41:1_30.66	HexCer d41:1	30.66	C47 H91 N O8	0.3	797.675	798.682	[M+H]+1	413612	808176	1.01326e+06	1.07144e+06	645747	444786	772218	475497	950704	708018	634987	570967	608229	409512	504814	658106	760788	683558	526616	621632	503369	765117	519083	487187	697503	1.27223e+06	425203	847354	1.06758e+06	552993	897110	556897	656333	478999	531414	845369	796465	714988	420928	747470	461053	828846
HexCer d41:4_36.16	HexCer d41:4	36.16	C47 H85 N O8	4.55	791.631	790.624	[M-H]-1	81968.3	59614.4	72620.8	81544.7	73953.5	101981	84517.3	81643	72688.3	67354.2	55197.6	75484.7	84259.8	64953	82451.1	87220.6	63257.2	58893.2	65682.6	72714.6	76551.3	66933.5	77351.4	84321.3	89024.4	61702.3	84124.5	60790.9	111400	60648.2	79174.1	57178.8	75358.8	68923.4	77472.1	72751.8	67209.7	65428.8	76683.9	63803.6	63138.9	69201.8
HexCer d41:7_23.88	HexCer d41:7	23.88	C47 H79 N O8	-8.95	785.574	786.581	[M+H]+1	6.04212e+06	5.72357e+06	8.42008e+06	6.79876e+06	1.17859e+07	6.22614e+06	4.90755e+06	4.54307e+06	1.21909e+07	1.5566e+07	1.06344e+07	3.79979e+06	5.13478e+06	3.61076e+06	6.86065e+06	1.93511e+07	5.43491e+06	4.82755e+06	4.76605e+06	6.49659e+06	6.93467e+06	4.13112e+06	2.00294e+06	7.92505e+06	4.54219e+06	6.86378e+06	3.5714e+06	3.44363e+07	3.84047e+06	6.14628e+06	2.6739e+06	7.32673e+06	803346	3.66869e+06	6.08641e+06	3.55936e+06	3.24368e+06	4.37649e+06	3.50267e+06	1.48031e+07	3.79341e+06	3.1966e+06
HexCer d41:7_26.91	HexCer d41:7	26.91	C47 H79 N O8	4.68	785.584	786.592	[M+H]+1	4.93365e+06	7.03832e+06	2.1742e+07	4.94518e+07	1.90161e+06	1.088e+07	7.50001e+06	5.93216e+06	1.6155e+07	2.17021e+07	3.25552e+07	4.17226e+06	5.22798e+06	7.01353e+06	1.41371e+07	2.08031e+06	1.60854e+07	1.9199e+07	1.32522e+07	9.18051e+06	3.01969e+06	2.22193e+06	8.63015e+06	4.99012e+06	1.33757e+07	1.73947e+07	6.81038e+06	1.12359e+07	2.77085e+06	3.14502e+06	1.38766e+07	9.42513e+06	9.50342e+06	5.7567e+06	3.05887e+06	8.12264e+06	1.19687e+07	6.50974e+06	2.19263e+06	1.87746e+07	2.22404e+06	5.02137e+06
HexCer d42:1_31.42	HexCer d42:1	31.42	C48 H93 N O8	-0.34	811.69	812.697	[M+H]+1	1.60342e+08	1.95841e+08	3.17627e+08	3.16754e+08	1.49559e+09	6.84217e+08	2.76811e+08	1.93967e+08	5.44204e+08	8.36836e+08	1.18908e+09	1.83907e+08	1.40965e+08	2.93396e+08	2.57188e+08	6.64161e+08	2.2313e+08	1.68951e+08	1.1693e+08	4.53292e+08	1.61558e+08	1.1208e+08	1.54607e+08	1.53148e+08	4.15823e+08	4.56453e+08	2.89815e+08	1.0431e+09	8.00532e+08	1.16307e+08	9.42176e+08	1.39273e+08	2.38588e+08	3.50371e+08	2.18129e+08	1.63535e+08	2.00666e+08	3.69386e+08	2.64967e+08	6.01086e+08	2.40642e+08	2.03714e+08
HexCer d42:2_29.48	HexCer d42:2	29.48	C48 H91 N O8	0.12	809.675	810.682	[M+H]+1	1.50556e+06	1.62492e+06	1.91398e+06	3.10379e+06	4.7711e+06	2.52408e+06	1.40883e+06	1.21893e+06	3.18701e+06	3.03256e+06	3.31465e+06	1.39971e+06	1.17476e+06	1.37647e+06	1.9263e+06	2.53643e+06	1.68774e+06	2.05214e+06	1.03429e+06	2.48967e+06	1.59091e+06	915020	1.04541e+06	1.50278e+06	1.99003e+06	2.23242e+06	1.02534e+06	4.0715e+06	3.58905e+06	1.26492e+06	2.57453e+06	1.3071e+06	1.7325e+06	2.93666e+06	1.31337e+06	1.97242e+06	1.38229e+06	1.88574e+06	1.53128e+06	2.89555e+06	2.3098e+06	1.54699e+06
HexCer d42:3_29.11	HexCer d42:3	29.11	C48 H89 N O8	0.28	807.659	808.667	[M+H]+1	717470	1.48264e+06	2.44679e+06	1.87039e+06	1.21272e+06	644200	2.98248e+06	1.02053e+06	1.5844e+06	1.48382e+06	1.11643e+06	1.3469e+06	1.62261e+06	921024	986853	3.00914e+06	1.85972e+06	1.30146e+06	1.28844e+06	1.49971e+06	917663	2.25573e+06	1.25049e+06	927366	1.39652e+06	2.50214e+06	851154	1.65688e+06	1.52088e+06	1.00007e+06	1.72479e+06	457030	666856	896684	1.16478e+06	1.5106e+06	1.27046e+06	936314	1.08818e+06	2.3258e+06	1.38948e+06	1.8394e+06
HexCer d42:3_30.2	HexCer d42:3	30.2	C48 H89 N O8	0.85	807.659	808.667	[M+H]+1	1.5448e+07	1.29896e+07	2.02921e+07	1.3378e+07	1.72547e+07	1.49933e+07	2.17022e+07	1.80641e+07	2.07821e+07	2.10196e+07	2.74713e+07	9.06097e+06	1.41674e+07	2.24407e+07	1.80467e+07	2.44935e+07	3.01631e+07	9.09902e+06	7.8571e+06	2.27993e+07	1.63917e+07	1.59287e+07	1.46664e+07	1.46203e+07	3.53106e+07	3.49829e+07	2.19362e+07	3.37021e+07	5.96231e+07	1.13033e+07	6.85411e+07	1.61943e+07	1.46839e+07	2.96934e+07	1.69234e+07	1.64232e+07	1.54261e+07	2.42734e+07	1.21618e+07	1.93268e+07	2.31113e+07	1.5179e+07
HexCer d42:3_31.82	HexCer d42:3	31.82	C48 H89 N O8	0.98	807.66	808.666	[M+H]+1	1.1795e+07	1.81835e+07	1.29364e+07	8.06852e+06	8.27187e+06	1.01051e+07	3.15681e+06	2.95503e+07	8.98174e+06	3.65051e+07	7.76266e+06	3.52483e+06	4.65615e+06	3.19261e+06	4.06248e+06	1.0197e+07	1.36565e+07	1.62093e+07	2.81423e+06	3.54345e+07	1.69674e+07	1.25699e+07	3.61943e+06	3.8591e+07	1.8571e+07	1.4744e+07	4.62183e+06	2.53303e+07	3.52774e+07	6.60109e+06	1.53961e+07	1.33538e+07	1.52648e+07	1.82855e+07	1.50501e+07	5.74455e+06	4.4424e+06	2.73246e+07	3.55508e+06	1.92113e+07	3.94532e+06	5.23472e+06
HexCer d42:6_28.9	HexCer d42:6	28.9	C48 H83 N O8	5.25	801.616	802.623	[M+H]+1	8.76065e+06	6.99884e+06	9.42228e+06	1.33475e+07	1.40585e+07	8.91654e+06	8.79472e+06	7.82493e+06	1.30951e+07	1.66847e+07	1.76008e+07	3.7794e+06	6.45106e+06	5.30013e+06	8.13973e+06	2.04062e+07	1.12148e+07	1.01009e+07	5.25273e+06	8.75302e+06	5.26982e+06	5.61597e+06	3.16447e+06	8.43014e+06	7.9135e+06	1.3676e+07	7.74979e+06	3.37848e+07	6.76227e+06	6.03519e+06	7.4844e+06	6.21261e+06	3.2131e+06	2.88151e+06	3.62541e+06	6.99349e+06	7.34841e+06	5.1888e+06	5.11559e+06	1.73719e+07	5.39703e+06	6.01002e+06
HexCer d43:1_32.41	HexCer d43:1	32.41	C49 H95 N O8	-8.62	825.699	826.704	[M+H]+1	195505	175404	1.09152e+06	201412	213059	239584	228283	169787	235593	362661	282562	206608	179811	174244	186923	261661	181667	200088	170128	283958	168841	1.28697e+06	461390	231845	247738	1.55058e+06	170390	413976	285887	163802	1.85309e+06	164562	219207	219277	169105	187735	205526	237164	175212	333158	189386	1.77292e+06
HexCer d43:1_33.51	HexCer d43:1	33.51	C49 H95 N O8	1.05	825.707	826.714	[M+H]+1	1.23068e+06	1.59524e+06	2.53533e+06	2.65449e+06	1.58543e+06	2.02605e+06	2.08663e+06	1.59668e+06	2.2114e+06	1.7022e+06	1.64657e+06	1.26093e+06	1.94584e+06	1.22398e+06	1.11059e+06	1.71617e+06	1.53681e+06	1.99779e+06	1.49318e+06	2.0837e+06	1.44016e+06	1.83083e+06	1.19043e+06	1.72979e+06	1.65638e+06	1.8268e+06	1.22541e+06	2.93907e+06	2.15001e+06	1.52235e+06	1.40032e+06	1.35834e+06	1.50929e+06	1.40822e+06	1.49208e+06	1.55535e+06	2.73812e+06	2.16084e+06	1.55224e+06	2.91301e+06	1.64832e+06	1.8222e+06
HexCer d43:1_31.13	HexCer d43:1	31.13	C49 H95 N O8	1.06	825.707	826.714	[M+H]+1	203226	263187	397678	414242	299446	209008	404659	195376	303757	380285	317680	323819	228192	193647	211307	277222	245965	275103	281279	268253	192051	297427	201741	201461	279784	417850	203214	355517	341521	206650	351557	214087	229963	255099	222830	314096	297176	265090	207428	344488	242134	257429
HexCer d43:1_9.44	HexCer d43:1	9.44	C49 H95 N O8	8.09	825.712	826.72	[M+H]+1	70631.9	105035	111134	100140	126930	82544.8	90600.7	83965.6	170163	206002	140922	77362.1	83457.1	83621.2	113594	132631	110220	90650.8	118829	195769	124772	89996.5	105360	109922	151678	147574	78113.8	161738	72582.9	75670.2	96387.8	84884.5	87082.2	157743	151021	138690	150314	159899	69822.2	200595	88513.6	110061
HexCer d43:3_31.18	HexCer d43:3	31.18	C49 H91 N O8	-1.73	821.673	822.68	[M+H]+1	300277	473981	577296	759393	911498	436526	669711	318257	529899	552670	593049	447198	370484	343071	368749	546856	421851	469684	422411	433951	298619	465995	318170	304634	475153	652616	360666	858622	658799	318016	659998	349986	415838	426996	343627	417634	413557	495273	363198	628228	413714	373420
HexCer d43:6_28.11	HexCer d43:6	28.11	C49 H85 N O8	4.58	815.631	798.629	[M+H-H2O]+1	9.21229e+06	8.46309e+06	2.20302e+07	1.13511e+07	2.57057e+07	1.59989e+07	8.72385e+06	6.63763e+06	2.14061e+07	2.72028e+07	5.27185e+07	5.09579e+06	5.66817e+06	1.01334e+07	1.65869e+07	2.03756e+07	1.19019e+07	8.59939e+06	5.49969e+06	1.6739e+07	6.703e+06	7.44379e+06	6.56848e+06	8.77117e+06	6.27674e+06	2.29107e+07	9.03664e+06	4.23075e+07	1.98669e+07	4.86337e+06	3.45597e+07	7.31954e+06	6.17691e+06	1.65935e+07	9.71163e+06	1.33307e+07	1.35657e+07	1.05303e+07	7.25183e+06	1.09988e+07	9.46651e+06	1.24641e+07
HexCer d43:6_29.72	HexCer d43:6	29.72	C49 H85 N O8	5.49	815.632	816.639	[M+H]+1	3.48195e+07	2.65511e+07	4.8533e+07	7.62058e+07	5.3874e+07	5.43496e+07	2.51251e+07	2.34734e+07	6.27411e+07	1.05239e+08	1.07334e+08	1.32835e+07	2.01102e+07	2.10156e+07	4.41878e+07	4.56876e+07	3.99407e+07	3.41266e+07	1.28329e+07	4.44861e+07	1.67887e+07	1.57444e+07	2.12089e+07	3.15856e+07	5.7116e+07	4.28859e+07	1.91925e+07	1.20189e+08	2.20442e+07	2.94792e+07	4.26398e+07	2.58755e+07	2.29831e+07	1.57224e+07	1.9815e+07	1.91379e+07	2.71354e+07	2.33646e+07	2.22615e+07	8.95921e+07	2.13857e+07	1.41256e+07
HexCer d43:7_25.92	HexCer d43:7	25.92	C49 H83 N O8	-6.76	813.606	814.614	[M+H]+1	1.02295e+08	6.26418e+07	1.37561e+08	4.17513e+07	2.54549e+08	9.55824e+07	9.00927e+07	1.15075e+08	1.90199e+08	3.62836e+08	3.30125e+08	5.66649e+07	8.04105e+07	1.09538e+08	1.48217e+08	2.32577e+08	7.3143e+07	7.72751e+07	3.00183e+07	2.86144e+08	7.64117e+07	1.02378e+08	3.28247e+07	4.09078e+07	1.1444e+08	1.4168e+08	9.2149e+07	4.97835e+08	7.98123e+07	8.87778e+07	1.74265e+08	3.43713e+07	3.48915e+07	7.94143e+07	7.66802e+07	7.56576e+07	5.2829e+07	1.59605e+08	7.516e+07	2.07958e+08	1.25462e+08	4.87637e+07
HexCer d44:1_32	HexCer d44:1	32	C50 H97 N O8	2.26	839.723	840.731	[M+H]+1	961867	856446	604039	694241	476310	468590	505550	1.09328e+06	703212	768599	1.11003e+06	992247	769283	692662	717923	889243	772968	779120	620775	1.17533e+06	1.30817e+06	690384	1.27446e+06	1.03735e+06	1.02727e+06	678165	780617	1.33461e+06	1.1047e+06	1.06472e+06	906377	720729	806367	1.30166e+06	792836	967333	1.31999e+06	841390	866257	829537	1.24605e+06	566084
HexCer d44:2_31.36	HexCer d44:2	31.36	C50 H95 N O8	-0.11	837.706	838.713	[M+H]+1	594558	800374	1.06884e+06	936752	2.67916e+06	1.6442e+06	905557	702886	1.20006e+06	1.71448e+06	2.32532e+06	669942	564753	847650	813545	1.65306e+06	785508	869105	519836	1.51975e+06	733074	604088	536690	729962	1.25378e+06	1.19348e+06	958383	2.56451e+06	2.14638e+06	518657	2.02093e+06	502671	822772	1.15325e+06	768284	659897	682265	1.12181e+06	807392	1.93336e+06	748859	796617
HexCer d44:3_36.56	HexCer d44:3	36.56	C50 H93 N O8	-6.77	835.684	834.677	[M-H]-1	64520.2	48577.2	60132.2	52141.9	46169.4	65077	50999.9	52301.3	49472.2	61167	53531.6	60013.6	56517.8	59877.9	55399.3	53087.8	48476.8	50666.3	47813.6	59766.6	50037.4	58952.1	50293.5	65365.8	58560.9	44045.3	62906.3	49474.1	75785.7	60779.6	49308	52131.7	58814	59177	60707.3	64095.8	44373.3	51227.4	64129.7	49669.3	55909.4	47159
HexCer d44:3_32.36	HexCer d44:3	32.36	C50 H93 N O8	-3.41	835.687	834.68	[M-H]-1	1.55574e+06	1.44083e+06	4.73557e+06	2.03449e+06	2.84923e+06	2.36248e+06	2.15814e+06	1.52191e+06	7.64203e+06	4.7371e+06	6.65214e+06	861960	1.60453e+06	1.50516e+06	1.86219e+06	4.32452e+06	2.57175e+06	3.9116e+06	2.83028e+06	5.40056e+06	757353	1.9064e+06	597563	1.76532e+06	4.02949e+06	2.33573e+06	1.22907e+06	7.28798e+06	5.25504e+06	1.57807e+06	2.59867e+06	743280	3.98913e+06	818096	2.41002e+06	2.7152e+06	5.236e+06	4.91962e+06	2.08647e+06	6.89085e+06	949093	1.08553e+06
HexCer d44:3_30.11	HexCer d44:3	30.11	C50 H93 N O8	0.06	835.69	836.697	[M+H]+1	179670	153403	224211	207975	143085	172284	154857	147239	152310	151276	152111	173387	148878	164528	147284	157956	133913	149069	151669	162903	158431	180268	166599	183546	214506	177047	165634	172797	175827	163692	213144	192157	181362	214261	180591	168653	195107	201083	190520	153374	211280	155705
HexCer d44:4_32.61	HexCer d44:4	32.61	C50 H91 N O8	-6.88	833.669	834.676	[M+H]+1	712574	780274	1.2411e+06	1.03942e+06	1.12598e+06	864031	363263	694744	1.85667e+06	1.7711e+06	2.47295e+06	481891	1.39703e+06	902663	932038	1.95239e+06	1.97008e+06	575174	731277	1.82403e+06	1.30091e+06	661512	608446	3.01363e+06	2.29772e+06	1.11388e+06	681273	2.69709e+06	4.49194e+06	1.39198e+06	3.54083e+06	1.04292e+06	1.74792e+06	807251	1.1959e+06	1.16977e+06	1.1658e+06	2.73285e+06	678162	1.57392e+06	1.30467e+06	619125
HexCer d44:4_30.16	HexCer d44:4	30.16	C50 H91 N O8	-4.79	833.67	832.663	[M-H]-1	537665	300255	1.05093e+06	490756	1.09226e+06	641321	422385	451477	2.3626e+06	2.77484e+06	1.88186e+06	921586	673156	1.23066e+06	862871	1.01731e+06	689138	276105	336368	291815	264082	247326	283986	337527	2.54614e+06	1.14314e+06	648813	2.54186e+06	2.21675e+06	195475	2.95887e+06	237216	2.36179e+06	219836	390825	223264	390037	1.79368e+06	446658	2.30198e+06	439844	232060
HexCer d44:4_31.43	HexCer d44:4	31.43	C50 H91 N O8	-2.39	833.672	834.68	[M+H]+1	1.46577e+07	2.02708e+07	2.99859e+07	3.4197e+07	1.79949e+08	9.14466e+07	2.93176e+07	2.74684e+07	7.43901e+07	1.14382e+08	1.40832e+08	2.1156e+07	1.49514e+07	3.78701e+07	3.32899e+07	9.43139e+07	2.30785e+07	2.72003e+07	1.14739e+07	6.80685e+07	1.73841e+07	1.19889e+07	1.32839e+07	1.50811e+07	5.81415e+07	5.04081e+07	3.76055e+07	1.45101e+08	1.04441e+08	1.09561e+07	1.21229e+08	1.3322e+07	2.78783e+07	4.26884e+07	2.86958e+07	1.48289e+07	3.0398e+07	4.73142e+07	3.34569e+07	8.70994e+07	2.55125e+07	1.99793e+07
HexCer d44:5_32.66	HexCer d44:5	32.66	C50 H89 N O8	-1.78	831.657	832.665	[M+H]+1	188797	211959	302526	424883	198182	214229	303747	161024	255560	264501	242919	190380	169822	151973	164651	244549	191480	203080	168330	237598	159068	223373	158709	178694	241635	254155	137275	423760	241909	154123	290403	178253	216939	187813	194000	197054	252644	200332	171448	348051	243666	265491
HexCer d44:5_33.04	HexCer d44:5	33.04	C50 H89 N O8	2.03	831.661	832.668	[M+H]+1	428535	453222	558758	603244	364569	359256	1.63871e+06	362074	577590	443677	375732	447300	419497	409009	448380	397138	396421	437305	397941	417154	383985	508708	771025	385606	1.15556e+06	1.60103e+06	339903	1.39761e+06	646487	365796	722023	398224	430229	504848	348177	454791	550827	614586	393771	1.6317e+06	642800	555477
HexCer d44:5_35.58	HexCer d44:5	35.58	C50 H89 N O8	6.41	831.664	832.671	[M+H]+1	976464	732486	590632	630698	320460	805603	654681	434036	430636	703133	669703	559730	419886	847721	340780	1.14096e+06	513691	594785	386667	1.86288e+06	383815	787266	440057	451723	487930	716487	454147	651708	1.15009e+06	334865	587658	524053	2.07731e+06	368080	451797	457620	596774	507931	849828	679808	400362	576412
HexCer d44:6_36.65	HexCer d44:6	36.65	C50 H87 N O8	7	829.649	830.656	[M+H]+1	456193	841572	577847	2.78823e+06	138042	311672	1.13812e+06	844473	620588	494886	243841	751908	489802	380156	717895	361428	2.74072e+06	4.55661e+06	1.29242e+06	256925	541253	680826	572012	525412	1.27789e+06	977557	418252	796820	876872	279556	581151	582641	574046	663172	314415	505585	469358	986244	344557	1.04416e+06	541236	717361
HexCer d45:2_31.16	HexCer d45:2	31.16	C51 H97 N O8	-2.15	851.72	852.727	[M+H]+1	76630.6	105679	167250	174216	125936	87901.4	170185	82168.5	110253	137403	133605	114020	94532.2	80755.5	88868.2	116590	103444	103733	99284.7	110814	74740.5	125087	82089	83254	117667	171378	85464.9	149518	115807	82479.6	147853	88061.9	79529.2	99554.1	86957.7	105548	124982	111488	87236.9	139739	90786.1	108266
HexCer d45:3_33.27	HexCer d45:3	33.27	C51 H95 N O8	-4.25	849.702	848.695	[M-H]-1	481419	874690	825921	904259	712581	684962	793500	575212	1.13808e+06	1.04137e+06	1.15449e+06	804438	953285	1.02015e+06	566208	659293	761327	627781	832050	811267	829832	774898	727046	479599	708922	716914	831869	1.47303e+06	972883	641087	760214	636699	924511	909756	634921	733274	639838	1.05296e+06	1.0375e+06	1.78039e+06	1.10614e+06	946304
HexCer d45:4_31.61	HexCer d45:4	31.61	C51 H93 N O8	-3.57	847.687	846.68	[M-H]-1	711132	1.44423e+06	2.58643e+06	1.52529e+06	3.26577e+06	1.45624e+06	1.09039e+06	1.64856e+06	2.16105e+06	2.32305e+06	5.40406e+06	733091	887280	960559	1.41027e+06	2.34354e+06	918928	2.0408e+06	2.31769e+06	2.67445e+06	898989	799461	801204	893437	1.0473e+06	636716	842173	5.07198e+06	1.50525e+06	1.17656e+06	1.64981e+06	1.60221e+06	827677	3.05914e+06	754856	740469	1.31152e+06	2.50332e+06	1.43495e+06	1.2676e+06	948018	1.00419e+06
HexCer d45:4_34.77	HexCer d45:4	34.77	C51 H93 N O8	-2.24	847.688	848.695	[M+H]+1	4.6721e+06	3.52095e+06	3.6931e+06	7.48217e+06	2.06773e+06	3.11124e+06	4.31029e+06	8.54902e+06	5.73296e+06	4.48181e+06	3.49185e+06	1.37643e+06	6.02211e+06	4.47456e+06	3.54308e+06	5.79605e+06	5.13032e+06	2.92467e+06	2.53579e+06	5.25405e+06	3.69579e+06	3.43625e+06	2.78428e+06	4.05877e+06	6.8567e+06	4.71421e+06	2.90753e+06	9.15275e+06	8.12927e+06	4.85567e+06	6.59809e+06	4.65381e+06	4.84583e+06	3.62841e+06	4.77401e+06	5.92302e+06	3.48685e+06	9.86108e+06	3.42451e+06	8.09693e+06	4.19283e+06	3.70267e+06
HexCer d45:4_34.44	HexCer d45:4	34.44	C51 H93 N O8	-1.66	847.689	848.696	[M+H]+1	335555	1.60893e+06	1.93652e+06	4.38673e+06	1.05753e+06	1.28114e+06	621773	342899	1.25239e+06	4.57334e+06	1.58349e+06	405004	3.45049e+06	3.36517e+06	1.49081e+06	1.23766e+06	3.22785e+06	2.91947e+06	1.93879e+06	3.32214e+06	528734	677981	1.18689e+06	2.26206e+06	6.18522e+06	1.00001e+06	1.97968e+06	4.22692e+06	6.59606e+06	756660	4.99772e+06	4.8999e+06	6.60502e+06	430297	2.30379e+06	4.87283e+06	3.59085e+06	3.02882e+06	910695	759832	1.9815e+06	2.68868e+06
HexCer d45:6_13.14	HexCer d45:6	13.14	C51 H89 N O8	-3.35	843.656	844.663	[M+H]+1	68276.7	91510.9	94906.5	58321.3	97183.1	73117.1	112086	54707.4	84142.9	86415.5	122366	51187.5	71515.7	68242.4	99884.1	75907.8	75378.1	97673.8	159259	128205	107701	102458	141904	155773	154479	104865	74096.4	68682.5	101238	86807.9	84413.7	69427	81852.4	181077	187878	133704	161074	187318	83229.6	67643.9	116266	86010.7
HexCer d46:2_33.67	HexCer d46:2	33.67	C52 H99 N O8	-5.77	865.732	866.739	[M+H]+1	328384	2.127e+06	822961	403744	252490	280208	1.59585e+06	261148	367181	1.62124e+06	312215	291389	497668	400516	352909	1.23822e+06	394834	511545	347533	491971	571606	410805	466085	946807	463582	577582	279431	791836	530585	412813	488250	819102	790837	425615	382024	332752	376848	579580	278330	2.43072e+06	328824	625409
HexCer d46:2_36.73	HexCer d46:2	36.73	C52 H99 N O8	1.1	865.738	866.745	[M+H]+1	912713	1.93145e+06	1.61547e+06	1.63901e+06	555746	804907	2.69469e+06	1.53411e+06	1.23288e+06	711878	728539	1.72512e+06	1.54992e+06	1.15607e+06	1.32406e+06	726516	1.50869e+06	1.20016e+06	887861	808205	1.97393e+06	2.00031e+06	1.15443e+06	1.5118e+06	1.7777e+06	1.59962e+06	1.72691e+06	1.64002e+06	1.12708e+06	1.1133e+06	1.49176e+06	1.06301e+06	1.18875e+06	1.49762e+06	1.16339e+06	1.44784e+06	2.0052e+06	1.47588e+06	1.25574e+06	1.92516e+06	1.93172e+06	1.6398e+06
HexCer d46:2_35.36	HexCer d46:2	35.36	C52 H99 N O8	2.32	865.739	866.747	[M+H]+1	301171	418975	785138	865616	234227	265683	801438	345263	621117	425114	243384	364691	640603	305945	361591	292786	478275	653519	423779	472961	409058	532388	393709	415600	583548	691925	335038	618147	640054	403254	499631	418152	399830	661874	380990	486246	695966	399059	397507	624372	409223	523352
HexCer d46:3_34.14	HexCer d46:3	34.14	C52 H97 N O8	-3.57	863.718	862.711	[M-H]-1	331951	427499	1.97533e+06	653462	811190	760973	686124	556391	2.19115e+06	1.06982e+06	1.93977e+06	290651	461072	451658	528131	1.40995e+06	843220	1.39595e+06	642534	1.52874e+06	371017	591210	120996	575385	899535	867717	387557	1.73067e+06	1.60879e+06	658660	877116	349131	1.21884e+06	263587	684872	924625	2.41129e+06	1.86466e+06	560354	1.90278e+06	241006	281314
HexCer d46:4_32.18	HexCer d46:4	32.18	C52 H95 N O8	-6.54	861.7	860.693	[M-H]-1	326946	1.74464e+06	1.48216e+06	2.07564e+06	7.85526e+06	3.7319e+06	3.75931e+06	2.18477e+06	1.17185e+07	3.81227e+06	8.71169e+06	3.34689e+06	285938	1.5567e+06	2.78702e+06	6.4971e+06	1.35114e+06	1.42133e+06	4.39422e+06	1.17538e+06	358386	3.38649e+06	279775	753828	5.36034e+06	5.59563e+06	2.45689e+06	6.11304e+06	8.72078e+06	526094	8.51297e+06	313517	9.75701e+06	365031	1.08482e+06	783226	2.33756e+06	5.16583e+06	1.75388e+06	1.1732e+07	374860	690758
HexCer d46:5_30.45	HexCer d46:5	30.45	C52 H93 N O8	-4.02	859.687	858.679	[M-H]-1	642736	826197	1.16228e+06	1.26685e+06	5.24594e+06	1.78907e+06	1.24728e+06	1.33501e+06	3.45577e+06	4.01932e+06	6.05611e+06	1.27281e+06	648724	1.55784e+06	1.56389e+06	3.02974e+06	1.33268e+06	906123	1.21769e+06	1.25718e+06	784131	742651	615979	1.02118e+06	4.13116e+06	2.84764e+06	1.41863e+06	4.52533e+06	3.92947e+06	314780	5.06553e+06	370722	2.07502e+06	1.25269e+06	1.52069e+06	1.048e+06	1.26392e+06	4.02597e+06	996491	5.29639e+06	569952	803309
HexCer d46:5_36.35	HexCer d46:5	36.35	C52 H93 N O8	-2.39	859.688	858.681	[M-H]-1	50272.1	44542.2	59186.9	51756	32665.3	47051.8	38243.3	50312	55200.5	45125.8	37084.7	41309.5	40834.2	45024.2	82746.3	123784	31896.1	51105	47148.2	33022.7	35411.6	52503.9	47867.5	56347.9	47542.5	56571.2	51734.5	51937.2	46253.8	41851.8	46143.6	54708.1	47019.1	43260.4	30283.2	45077.9	40878.8	56562.5	55568.9	36068.9	45173.3	40293.8
HexCer d46:6_32.12	HexCer d46:6	32.12	C52 H91 N O8	-1.44	857.673	858.681	[M+H]+1	1.03835e+06	708739	936242	778157	631323	628500	815815	645894	847842	619245	849059	1.08037e+06	951447	755669	509315	791534	793592	577863	809857	1.04212e+06	798191	887508	714462	1.00877e+06	1.28042e+06	607353	657978	1.41458e+06	848247	837257	1.30118e+06	874602	759343	1.01252e+06	951854	1.1085e+06	1.21391e+06	1.42847e+06	857826	784819	974330	746301
HexCer d47:1_19.98	HexCer d47:1	19.98	C53 H103 N O8	-3.75	881.765	882.772	[M+H]+1	99259.2	98335.7	67851.5	91481.7	93134.2	85510.2	104124	75451.5	53631.9	77753.3	77582.5	72605.6	82389	61871.7	73414	81674.5	67126.1	72029.4	122286	109486	89996.8	220618	89092.7	107664	125125	86912.7	72237.4	126926	90651.9	88630.2	92638.7	65791.1	91645	96934	101712	116865	115682	84967.4	58811.8	84259.5	81650.5	71367.6
HexCer d47:4_31.29	HexCer d47:4	31.29	C53 H97 N O8	-5.29	875.717	858.716	[M+H-H2O]+1	158535	216316	364438	344308	620086	250898	253273	169360	350560	315223	503913	213682	164208	199322	188091	337463	200814	224164	178224	276488	158824	179447	143955	160677	256606	314328	208488	500190	430744	143754	431309	157979	187641	245975	175944	180576	188386	279408	208036	363235	217645	426184
HexCer d47:5_31.84	HexCer d47:5	31.84	C53 H95 N O8	-1.76	873.704	872.697	[M-H]-1	554765	1.48779e+06	1.58845e+06	674991	1.95279e+07	1.80099e+06	953950	519354	478394	1.74231e+07	6.54057e+06	6.24513e+06	1.42106e+06	2.46363e+06	1.29218e+06	3.272e+06	1.61047e+06	2.66831e+06	1.89439e+06	1.08382e+06	558495	397233	1.43374e+06	554452	5.84897e+06	290398	941737	6.21827e+06	1.2389e+06	731536	342960	569823	1.92879e+06	585228	1.16411e+06	3.25941e+06	1.1687e+06	2.43514e+06	2.88852e+06	1.42219e+06	3.23834e+06	438265
HexCer d47:5_34.61	HexCer d47:5	34.61	C53 H95 N O8	-1.35	873.705	874.712	[M+H]+1	344469	949606	390049	1.2082e+06	149589	237073	565790	920655	236933	1.76667e+06	244784	309524	400604	232847	297952	365912	698164	416436	244470	694460	240518	420065	254437	1.44805e+06	909391	4.32356e+06	182030	363358	1.94672e+06	224271	458597	525932	1.32292e+06	233665	367700	899492	1.00809e+06	225083	261343	625307	537266	797481
HexCer d47:5_32.67	HexCer d47:5	32.67	C53 H95 N O8	-0.9	873.705	872.698	[M-H]-1	597914	500526	688450	507276	1.58322e+06	1.22872e+06	556538	679263	613621	2.03689e+06	1.63758e+06	248350	607538	263768	519778	2.64294e+06	505066	595250	427353	1.5542e+06	487338	340694	140165	454309	1.23009e+06	445071	528460	3.36854e+06	1.70506e+06	161898	380509	289830	414156	1.0193e+06	698300	420454	132447	1.18794e+06	302191	1.73618e+06	472314	221278
HexCer d47:6_30.56	HexCer d47:6	30.56	C53 H93 N O8	-0.95	871.689	870.682	[M-H]-1	284019	360595	302121	595320	2.37075e+06	1.08456e+06	448654	653146	509632	2.30371e+06	1.35155e+06	241253	328401	340338	389712	1.04775e+06	356354	157030	115717	563432	274036	205766	210672	165652	1.3219e+06	542478	452644	2.29955e+06	874777	95320.7	1.58295e+06	195500	537974	834440	310195	119372	110549	870715	259871	1.49536e+06	298799	394396
HexCer d48:0_29.87	HexCer d48:0	29.87	C54 H107 N O8	7.41	897.806	898.814	[M+H]+1	367807	285142	352813	345819	304945	252092	284792	263873	320361	385065	369076	352540	361524	276142	253647	278159	237308	311244	340477	370264	398602	360383	326561	351470	449423	286658	299623	420188	374139	295074	362320	309192	360064	429629	738195	339293	342604	448096	300210	366760	370827	316622
HexCer d48:5_33.58	HexCer d48:5	33.58	C54 H97 N O8	-6.91	887.715	886.708	[M-H]-1	1.14676e+06	921387	1.64848e+06	1.1872e+06	748274	918085	953048	772322	1.16595e+06	947926	973855	786491	1.40366e+06	928227	691495	795916	1.03768e+06	1.10163e+06	1.57494e+06	1.38785e+06	799475	1.03105e+06	745125	953562	702976	669225	866530	1.04139e+06	906085	1.16938e+06	1.17065e+06	832133	669679	1.05375e+06	1.09929e+06	955963	1.03944e+06	814786	1.40017e+06	1.0545e+06	946530	1.10861e+06
HexCer d48:7_33.73	HexCer d48:7	33.73	C54 H93 N O8	6.21	883.696	884.703	[M+H]+1	410403	435393	1.20211e+06	475236	277491	276723	546348	428572	456689	420152	340998	377313	624005	426376	357310	408509	560671	617969	420150	628433	482102	580227	366723	499942	639034	525228	372816	779924	659219	509513	1.29124e+06	397271	404859	699000	365166	546487	594029	606818	457109	691000	527990	1.17528e+06
HexCer t31:1_30.77	HexCer t31:1	30.77	C37 H71 N O9	-3.7	673.51	672.503	[M-H]-1	183774	347775	624236	812727	353164	204316	387722	310190	689914	273886	333972	249363	580465	403660	458633	332631	540966	706025	371477	343318	266820	454846	504090	152885	206600	933630	319205	463331	656082	537027	524405	472110	393655	264248	632153	565597	473595	188245	260296	275771	270279	321021
HexCer t33:0_31.27	HexCer t33:0	31.27	C39 H77 N O9	-0.57	703.559	704.567	[M+H]+1	343220	393160	2.79034e+06	629906	2.2632e+06	452853	834114	764725	632738	770591	909528	410152	471195	359762	339492	3.07567e+06	362455	404601	350384	640272	393929	5.15963e+06	263918	320030	463157	910805	695822	1.69708e+06	805828	447668	2.32259e+06	335550	384020	649135	378817	834204	513098	1.15024e+06	450711	655614	392834	2.22505e+06
HexCer t34:0_30.3	HexCer t34:0	30.3	C40 H79 N O9	-5.35	717.572	718.579	[M+H]+1	316448	285069	387469	361670	441176	350212	386141	371929	343600	392615	374983	362534	411644	486447	287064	341396	314785	320640	296679	414422	339590	370831	353067	407529	381249	515673	384030	734991	837162	295627	461454	359715	345636	365122	310922	393193	418747	488453	366361	396622	344146	327503
HexCer t34:0_26.04	HexCer t34:0	26.04	C40 H79 N O9	0.35	717.576	718.583	[M+H]+1	870936	1.36948e+06	2.76324e+06	3.59672e+06	1.96204e+06	1.27929e+06	1.25521e+06	1.01449e+06	2.75611e+06	3.01425e+06	2.84638e+06	732389	1.09036e+06	1.39761e+06	2.09037e+06	2.74652e+06	2.23519e+06	1.8247e+06	1.60264e+06	1.44388e+06	955247	1.09835e+06	1.59818e+06	1.02197e+06	1.42885e+06	1.91314e+06	789806	3.64138e+06	1.48633e+06	879552	1.5394e+06	984538	1.44756e+06	1.12702e+06	829478	928089	1.24298e+06	1.83564e+06	895192	2.05069e+06	988908	1.32946e+06
HexCer t34:0_24.45	HexCer t34:0	24.45	C40 H79 N O9	2.04	717.577	718.584	[M+H]+1	3.20218e+06	943393	3.80686e+06	1.10306e+06	2.63474e+06	1.25364e+06	2.51383e+06	1.62667e+06	2.05648e+06	2.3226e+06	2.24275e+06	746414	6.2037e+06	2.5005e+06	1.207e+06	2.56395e+06	3.32363e+06	5.7839e+06	998110	3.59919e+06	1.20372e+06	3.24218e+06	1.08132e+06	3.5507e+06	2.97427e+06	4.51944e+06	2.67681e+06	5.02103e+06	6.99406e+06	1.91444e+06	2.08437e+06	1.76658e+06	2.49664e+06	3.14318e+06	3.16161e+06	7.2749e+06	3.98106e+06	2.71456e+06	1.95131e+06	1.88788e+06	3.04958e+06	1.40845e+06
HexCer t36:1_27.49	HexCer t36:1	27.49	C42 H81 N O9	0.14	743.591	726.588	[M+H-H2O]+1	6.33567e+06	7.26875e+06	8.79236e+06	7.6367e+06	7.53601e+06	6.18362e+06	6.0853e+06	6.13348e+06	9.2351e+06	9.05808e+06	9.94505e+06	6.49888e+06	6.66371e+06	5.86424e+06	8.35654e+06	7.27982e+06	7.31069e+06	7.08415e+06	6.11303e+06	7.78492e+06	6.1276e+06	6.41989e+06	6.68998e+06	6.65383e+06	6.7873e+06	8.44464e+06	6.82028e+06	8.70178e+06	7.70544e+06	6.09054e+06	7.16206e+06	5.39235e+06	6.50552e+06	8.42128e+06	5.80183e+06	7.01669e+06	6.29974e+06	6.37435e+06	5.57677e+06	1.05105e+07	8.61285e+06	6.8141e+06
HexCer t36:2_25.36	HexCer t36:2	25.36	C42 H79 N O9	0.77	741.576	724.573	[M+H-H2O]+1	5.45693e+06	6.64731e+06	8.16194e+06	6.85677e+06	9.27626e+06	8.98893e+06	6.2034e+06	4.32682e+06	9.33457e+06	1.1443e+07	1.23591e+07	5.90012e+06	6.69586e+06	6.87967e+06	6.41265e+06	9.18567e+06	6.64985e+06	7.1844e+06	6.26974e+06	1.00219e+07	6.98334e+06	5.04307e+06	4.77363e+06	5.67543e+06	7.15478e+06	7.56797e+06	5.55924e+06	1.28927e+07	8.82898e+06	5.76335e+06	1.06732e+07	5.48645e+06	6.29287e+06	8.66058e+06	5.92064e+06	7.33122e+06	4.21011e+06	7.14263e+06	4.52836e+06	9.2567e+06	4.90299e+06	6.54238e+06
HexCer t36:3_24.71	HexCer t36:3	24.71	C42 H77 N O9	-2.35	739.558	740.565	[M+H]+1	352117	308652	417219	322153	1.15905e+06	354078	2.17322e+06	359688	519341	1.05637e+06	1.18787e+06	188112	234228	316592	421226	986336	328437	315387	214000	716173	274279	249023	228179	292197	438290	410059	327713	1.30402e+06	3.83233e+06	212916	604152	229089	236673	367845	1.96346e+06	5.64572e+06	256177	437818	218686	518813	301676	311402
HexCer t36:4_25.02	HexCer t36:4	25.02	C42 H75 N O9	-3.49	737.542	738.549	[M+H]+1	4.39101e+07	3.45536e+07	4.46169e+07	3.64532e+07	1.77761e+07	3.4884e+07	3.33266e+07	4.24333e+07	2.76382e+07	1.84187e+07	1.3736e+07	1.27572e+07	5.20985e+07	5.01965e+07	2.16908e+07	5.1953e+07	5.15779e+07	5.49346e+07	2.36729e+07	5.62086e+07	4.42602e+07	3.73192e+07	2.23028e+07	5.50411e+07	6.48087e+07	4.85901e+07	4.34529e+07	2.59025e+07	1.0804e+08	3.47156e+07	6.15324e+07	3.81167e+07	4.46436e+07	1.03188e+08	4.69869e+07	6.61402e+07	6.77652e+07	4.41683e+07	4.08823e+07	3.89904e+07	3.42556e+07	3.03067e+07
HexCer t36:4_26.55	HexCer t36:4	26.55	C42 H75 N O9	2.4	737.546	738.553	[M+H]+1	1.08635e+08	1.08611e+08	1.20796e+08	1.18107e+08	1.15214e+08	9.51473e+07	1.54033e+08	6.44772e+07	1.03849e+08	1.04904e+08	1.06368e+08	1.13526e+08	1.03964e+08	1.28042e+08	1.03312e+08	1.19248e+08	8.57095e+07	4.50223e+07	1.00599e+08	1.18501e+08	8.14671e+07	1.14585e+08	1.03207e+08	1.29535e+08	1.1644e+08	1.54571e+08	9.93089e+07	1.24114e+08	9.75655e+07	8.07489e+07	1.21454e+08	7.96536e+06	4.29201e+07	4.64576e+07	1.14382e+08	1.17323e+08	6.56352e+07	1.0907e+08	1.06958e+08	4.86797e+07	1.10397e+08	1.20711e+08
HexCer t36:5_30.17	HexCer t36:5	30.17	C42 H73 N O9	8.57	735.535	736.542	[M+H]+1	365791	473846	169076	1.41274e+06	330730	274918	419438	331525	514402	483804	700025	436334	701214	347543	410844	137481	307268	472082	747843	424821	702278	245047	452164	764607	561696	359653	397858	410679	458788	710566	507241	534484	645780	876710	2.22e+06	691100	471653	257906	357353	639283	934943	413023
HexCer t36:5_29.44	HexCer t36:5	29.44	C42 H73 N O9	9.69	735.536	736.543	[M+H]+1	501932	859485	503727	354041	388429	1.01746e+06	220049	387519	267593	408099	572206	425689	387535	162588	376397	728358	332282	703414	562214	669532	335621	220089	677324	890243	710054	251688	931848	572058	224023	448240	332617	539956	472805	859504	485357	428101	363302	341420	2.70775e+06	497870	272915	358139
HexCer t37:4_23.94	HexCer t37:4	23.94	C43 H77 N O9	-2.72	751.558	752.565	[M+H]+1	8.68638e+07	2.22505e+08	1.02755e+08	2.05613e+08	2.0644e+08	9.96906e+07	2.6386e+08	7.59045e+07	2.08686e+08	3.37629e+08	1.02145e+08	3.33622e+07	9.31724e+07	4.28509e+07	1.7337e+08	1.73569e+08	1.19595e+08	8.97129e+07	2.87062e+07	8.81013e+07	8.90476e+07	5.51149e+07	4.5788e+07	6.72108e+07	1.48798e+08	1.54319e+08	1.09057e+08	1.76121e+09	1.72533e+08	5.79439e+07	1.57857e+08	3.33983e+08	1.271e+08	8.12856e+07	1.62099e+08	3.93519e+07	1.84688e+07	9.17625e+07	4.02836e+07	3.11413e+08	1.24413e+08	9.4725e+06
HexCer t38:1_28.6	HexCer t38:1	28.6	C44 H85 N O9	0.18	771.623	772.63	[M+H]+1	440690	585813	996526	1.09502e+06	694779	557793	1.05042e+06	390574	890451	864317	1.00528e+06	385896	462261	430825	592901	661853	773154	654613	568439	624679	375403	479632	430790	419916	757287	1.11447e+06	387431	1.31163e+06	570561	390324	928634	454898	521232	675704	494148	648857	538421	592190	380292	606577	488172	579664
HexCer t38:4_21.03	HexCer t38:4	21.03	C44 H79 N O9	-4.93	765.572	764.564	[M-H]-1	151204	162576	83845	125465	958249	126845	100864	148314	120315	359152	541749	119812	138932	86025	132184	461889	116819	147887	127616	320103	128099	135948	118616	218171	109584	162659	119359	569631	120594	162368	257610	127094	48264.2	214175	196364	155612	139947	138598	46882.2	95261.4	99935.4	113504
HexCer t38:4_26.6	HexCer t38:4	26.6	C44 H79 N O9	-2.37	765.574	766.581	[M+H]+1	2.36309e+09	2.44842e+09	2.61408e+09	2.71795e+09	2.47563e+09	2.17021e+09	2.58197e+09	2.78902e+09	2.34567e+09	2.11691e+09	2.28765e+09	2.55454e+09	2.20403e+09	2.26928e+09	2.2916e+09	2.66674e+09	1.98623e+09	2.00515e+09	2.1444e+09	2.36267e+09	2.22719e+09	2.48261e+09	2.32408e+09	3.344e+09	2.77128e+09	2.72314e+09	2.34548e+09	2.47184e+09	2.4108e+09	2.27969e+09	2.54356e+09	2.47864e+09	2.71368e+09	2.26594e+09	2.51504e+09	2.50948e+09	2.16981e+09	2.34551e+09	2.44251e+09	2.40416e+09	2.46816e+09	2.53148e+09
HexCer t38:4_28.88	HexCer t38:4	28.88	C44 H79 N O9	-1.75	765.574	766.581	[M+H]+1	1.65761e+07	2.877e+07	4.4145e+07	1.45289e+08	8.11425e+06	1.68589e+07	2.49806e+07	1.99751e+07	4.05257e+07	6.67637e+07	1.93523e+07	2.13264e+07	1.77291e+07	1.5684e+07	3.92567e+07	2.65862e+07	4.45821e+07	5.45251e+07	2.24549e+07	1.54717e+07	1.02882e+07	2.1755e+07	2.54255e+07	2.44114e+07	3.03888e+07	9.79813e+07	2.22515e+07	5.85575e+07	1.53424e+07	1.79694e+07	4.3684e+07	2.62238e+07	2.00293e+07	5.27978e+06	1.19975e+07	1.59161e+07	3.56589e+07	1.58043e+07	2.16744e+07	8.52183e+07	1.91308e+07	2.20762e+07
HexCer t38:5_26.11	HexCer t38:5	26.11	C44 H77 N O9	9.87	763.567	764.575	[M+H]+1	4.11937e+08	4.32715e+08	8.68116e+08	3.5403e+08	9.66619e+08	6.11809e+08	2.06821e+08	4.01539e+08	1.10582e+09	1.00136e+09	1.32745e+09	1.9226e+08	2.15905e+08	3.69185e+08	6.66974e+08	8.43658e+08	3.71633e+08	3.47033e+08	3.94182e+08	5.97557e+08	4.07608e+08	3.05427e+08	2.66449e+08	4.21985e+08	3.11834e+08	5.52919e+08	2.81099e+08	1.63924e+09	5.12884e+08	1.94197e+08	5.70079e+08	3.90316e+08	1.75154e+08	6.1606e+08	3.64043e+08	5.2553e+08	3.70927e+08	4.6577e+08	2.89062e+08	4.69693e+08	3.05441e+08	3.19357e+08
HexCer t38:7_4.85	HexCer t38:7	4.85	C44 H73 N O9	8.06	759.535	760.542	[M+H]+1	2.5991e+07	3.39597e+07	3.15867e+07	1.43818e+07	2.57984e+07	2.25385e+07	1.4847e+07	1.91418e+07	3.13073e+07	3.22814e+07	3.68078e+07	2.94948e+07	3.44486e+07	3.06476e+07	1.69602e+07	2.1352e+07	2.02902e+07	2.27642e+07	148439	138244	120468	3.85864e+07	207551	188870	186045	2.48155e+07	2.0537e+07	3.55265e+07	4.07643e+07	3.12847e+07	4.56119e+07	1.59131e+07	2.28548e+07	122263	136436	101866	112099	105447	3.12095e+07	4.40386e+07	4.47844e+07	4.57685e+07
HexCer t38:7_2.42	HexCer t38:7	2.42	C44 H73 N O9	8.59	759.535	760.542	[M+H]+1	1.84985e+06	1.25974e+06	3.50702e+06	1.48872e+06	1.65034e+06	1.16185e+06	1.43794e+06	1.73632e+06	3.4201e+06	1.16006e+06	3.77157e+06	2.17482e+06	1.88739e+06	2.64445e+06	2.76745e+06	2.62556e+06	725278	1.91104e+06	97105.3	102623	95056.4	4.00362e+06	129452	113049	150793	2.0496e+06	2.12679e+06	3.91396e+06	5.90407e+06	904821	3.61083e+06	1.44163e+06	2.48778e+06	128507	103013	110895	128838	84700.6	1.40451e+06	1.89067e+06	2.68666e+06	2.05996e+06
HexCer t39:5_30.42	HexCer t39:5	30.42	C45 H79 N O9	8.95	777.582	778.59	[M+H]+1	1.11334e+07	6.52596e+06	1.13248e+07	8.27958e+06	7.93589e+06	1.22644e+07	5.80317e+06	4.35562e+06	1.29944e+07	1.24502e+07	1.32138e+07	4.13209e+06	4.69832e+06	6.19032e+06	8.17418e+06	9.80085e+06	6.19933e+06	1.09119e+07	6.11251e+06	1.16315e+07	8.51589e+06	6.81012e+06	3.5119e+06	8.41361e+06	6.19518e+06	1.25799e+07	6.14116e+06	1.02481e+07	1.28021e+07	4.59485e+06	1.38745e+07	3.89212e+06	4.79626e+06	1.20138e+07	7.63276e+06	1.42032e+07	1.30205e+07	7.5344e+06	8.6191e+06	6.37932e+06	7.88832e+06	8.71961e+06
HexCer t40:5_32.28	HexCer t40:5	32.28	C46 H81 N O9	9.61	791.599	792.606	[M+H]+1	216064	136030	182497	191617	169165	172275	172286	165147	206607	259466	211243	255023	188920	213863	137699	198524	177194	180889	215477	232810	188685	206763	153003	214944	299551	157735	183311	266648	242586	217988	366788	200276	214192	269802	195481	247901	320599	252893	169919	205060	227232	188099
HexCer t41:0_32.14	HexCer t41:0	32.14	C47 H93 N O9	0.9	815.686	814.678	[M-H]-1	247969	168355	211349	143535	143664	123079	166088	202129	234674	116404	164119	118210	487159	323379	136269	159535	324997	192050	223355	389080	221293	231808	216195	180289	274069	313994	399156	729669	489629	263586	198623	220325	195574	189866	239476	269192	604352	489332	251675	174326	284309	210817
HexCer t41:0_31.75	HexCer t41:0	31.75	C47 H93 N O9	1.36	815.686	816.693	[M+H]+1	3.09614e+07	2.25011e+07	6.74662e+07	2.19308e+07	5.69063e+07	5.92573e+07	2.33459e+07	2.49045e+07	4.00479e+07	6.99111e+07	1.20929e+08	1.46507e+07	2.01808e+07	2.74468e+07	2.96612e+07	8.28937e+07	4.16232e+07	5.09312e+07	2.18849e+07	7.25863e+07	3.05329e+07	2.61512e+07	1.76596e+07	4.51059e+07	4.25636e+07	3.04823e+07	1.99924e+07	1.2031e+08	5.05738e+07	2.21812e+07	3.64797e+07	3.16199e+07	1.57374e+07	1.00441e+08	3.19362e+07	4.41121e+07	4.01598e+07	4.23455e+07	2.0936e+07	6.36468e+07	1.71292e+07	1.76475e+07
HexCer t41:0_31.42	HexCer t41:0	31.42	C47 H93 N O9	2.18	815.687	816.694	[M+H]+1	2.82184e+07	3.64026e+07	4.72795e+07	5.86584e+07	3.02657e+08	1.18612e+08	5.58273e+07	3.72877e+07	1.07752e+08	1.3679e+08	2.28035e+08	3.57933e+07	2.25165e+07	6.50204e+07	5.21243e+07	1.18264e+08	3.56089e+07	3.77965e+07	1.75165e+07	9.304e+07	3.54855e+07	2.67619e+07	2.67099e+07	2.87021e+07	8.35908e+07	8.7364e+07	5.49625e+07	2.19103e+08	1.57511e+08	2.28524e+07	1.8012e+08	2.5899e+07	5.14207e+07	6.38642e+07	4.55902e+07	3.01835e+07	3.78905e+07	6.38483e+07	4.7932e+07	1.24485e+08	4.81146e+07	3.82351e+07
HexCer t41:1_29.56	HexCer t41:1	29.56	C47 H91 N O9	1.26	813.67	814.678	[M+H]+1	2.30615e+07	2.53766e+07	3.07424e+07	2.92345e+07	2.04748e+08	6.71178e+07	2.4631e+07	2.73218e+07	5.18243e+07	1.03795e+08	1.17313e+08	1.84473e+07	1.65444e+07	2.98241e+07	4.76159e+07	7.49295e+07	3.67275e+07	1.98167e+07	1.25714e+07	5.85844e+07	2.43447e+07	1.71124e+07	1.80382e+07	2.10157e+07	5.19305e+07	4.41865e+07	2.85588e+07	1.63979e+08	7.24506e+07	1.29189e+07	1.08318e+08	1.62132e+07	2.16741e+07	7.36454e+07	2.64761e+07	1.94911e+07	1.59148e+07	3.05485e+07	2.12841e+07	6.63534e+07	2.78691e+07	2.36626e+07
HexCer t41:2_31.59	HexCer t41:2	31.59	C47 H89 N O9	-1.08	811.653	812.66	[M+H]+1	2.94346e+06	2.21405e+06	9.39001e+06	2.5158e+06	2.07074e+07	1.13108e+07	1.4464e+06	1.20406e+06	9.96373e+06	2.11069e+07	2.92259e+07	1.04003e+06	1.46904e+06	2.40668e+06	3.20923e+06	1.40143e+07	4.53453e+06	7.08255e+06	2.48266e+06	2.2138e+07	2.55647e+06	2.26068e+06	1.10875e+06	3.7752e+06	7.602e+06	3.22081e+06	1.3085e+06	2.59362e+07	9.05865e+06	1.34836e+06	6.88228e+06	1.37007e+06	1.52565e+06	5.42619e+06	5.13016e+06	4.07552e+06	7.57257e+06	4.45862e+06	5.221e+06	1.33684e+07	1.95985e+06	936215
HexCer t41:2_30.83	HexCer t41:2	30.83	C47 H89 N O9	0.41	811.654	810.646	[M-H]-1	177304	190603	136247	333985	125081	239503	128834	382084	166949	531191	166271	99517	96567.7	119110	111073	151505	159846	116686	93766.3	378249	171060	114508	106934	429830	357903	129747	103817	643906	478293	99937.5	299535	129303	175546	314083	118865	100221	114188	114301	259682	251200	225167	147282
HexCer t41:3_29.76	HexCer t41:3	29.76	C47 H87 N O9	-3.5	809.635	810.64	[M+H]+1	1.51161e+06	2.27268e+06	5.3673e+06	2.93556e+06	1.38911e+07	6.24955e+06	3.9981e+06	2.32115e+06	4.03739e+06	9.63287e+06	1.6406e+07	1.63464e+06	1.47121e+06	2.85619e+06	4.22944e+06	8.72557e+06	2.62034e+06	3.55044e+06	1.92453e+06	6.86257e+06	1.53618e+06	2.14498e+06	1.25808e+06	2.4446e+06	5.09261e+06	3.102e+06	1.55732e+06	1.98947e+07	4.7572e+06	1.33847e+06	9.99188e+06	3.0868e+06	1.14203e+06	2.40901e+06	2.10601e+06	2.34334e+06	3.02312e+06	4.23329e+06	2.06187e+06	3.57434e+06	2.8887e+06	2.06776e+06
HexCer t41:5_5.45	HexCer t41:5	5.45	C47 H83 N O9	-3.31	805.604	806.611	[M+H]+1	1.18829e+07	1.10314e+07	1.1691e+07	1.39845e+07	9.55562e+06	1.19292e+07	1.02036e+07	1.36121e+07	1.48592e+07	1.15896e+07	1.16628e+07	1.0685e+07	1.3067e+07	9.77298e+06	1.64943e+07	1.41073e+07	1.33339e+07	8.13627e+06	312159	609247	256611	1.31885e+07	307404	310082	316713	9.91441e+06	1.11575e+07	9.72254e+06	1.62282e+07	1.56239e+07	1.46577e+07	8.86771e+06	1.30941e+07	345216	521702	328674	355998	313893	9.53989e+06	1.39597e+07	1.3561e+07	1.50838e+07
HexCer t42:0_35.07	HexCer t42:0	35.07	C48 H95 N O9	-2.08	829.699	830.706	[M+H]+1	201893	291358	606426	459596	131893	182592	301358	181927	321990	228636	199577	326784	295841	249056	954996	253657	371465	476363	300966	322296	399175	318350	216922	299413	237884	437316	242411	466457	340067	240950	310115	316832	269772	282326	191908	383374	450466	258086	339480	479686	314922	365510
HexCer t42:1_33.52	HexCer t42:1	33.52	C48 H93 N O9	0.2	827.685	828.692	[M+H]+1	4.51803e+07	4.85328e+07	5.4212e+07	2.0298e+07	1.27605e+07	2.67165e+07	1.31412e+07	6.04094e+07	3.69105e+07	6.3289e+07	1.8028e+07	1.01117e+07	3.71531e+07	1.69393e+07	1.16915e+07	3.69367e+07	3.9239e+07	4.74706e+07	1.98124e+07	8.08136e+07	3.595e+07	3.12092e+07	9.50095e+06	8.11851e+07	6.21526e+07	4.71123e+07	2.2146e+07	5.85535e+07	8.2602e+07	3.74967e+07	3.32056e+07	3.6762e+07	4.10433e+07	3.535e+07	3.24574e+07	1.91868e+07	3.07816e+07	4.00245e+07	3.56368e+07	6.40048e+07	2.16026e+07	2.466e+07
HexCer t42:1_27.03	HexCer t42:1	27.03	C48 H93 N O9	1.78	827.687	828.694	[M+H]+1	820253	1.32808e+06	1.49e+06	1.25847e+06	1.31208e+06	725351	776102	1.026e+06	1.09322e+06	1.40446e+06	1.69307e+06	1.06276e+06	926222	706401	933042	993801	1.02071e+06	943611	961519	1.09319e+06	1.11244e+06	1.29782e+06	1.20225e+06	953481	1.11039e+06	1.54624e+06	879314	1.56599e+06	879936	752040	1.24072e+06	1.29848e+06	1.25253e+06	1.45067e+06	928991	1.1588e+06	1.21396e+06	1.33865e+06	798035	1.29048e+06	1.23082e+06	1.56902e+06
HexCer t42:1_28.71	HexCer t42:1	28.71	C48 H93 N O9	2.52	827.687	828.694	[M+H]+1	499568	602323	1.06466e+06	1.05877e+06	679002	707335	893186	535655	944542	986548	1.05061e+06	474382	446958	473938	671710	698255	818178	764623	549621	687158	502756	583170	510999	456166	694298	1.16189e+06	417819	1.26821e+06	752837	395752	897893	481594	503977	760547	477790	763375	706771	668515	444732	937341	634038	740191
HexCer t42:2_29.14	HexCer t42:2	29.14	C48 H91 N O9	0.49	825.67	826.677	[M+H]+1	1.26789e+06	1.34838e+06	2.13671e+06	1.63336e+06	1.36895e+06	1.44501e+06	2.97208e+06	891201	1.38361e+06	1.86527e+06	974941	1.374e+06	3.25172e+06	1.10939e+06	947212	1.28706e+06	2.98991e+06	1.29857e+06	1.24548e+06	1.30965e+06	801367	1.96986e+06	1.09201e+06	2.21738e+06	3.83143e+06	3.31275e+06	914500	1.65278e+06	4.54368e+06	1.15479e+06	4.20659e+06	429521	582346	783047	1.11872e+06	1.31916e+06	1.16979e+06	2.90347e+06	1.0481e+06	2.32204e+06	1.21339e+06	1.6063e+06
HexCer t42:2_33.45	HexCer t42:2	33.45	C48 H91 N O9	9.88	825.678	826.685	[M+H]+1	1.08595e+06	758354	1.73587e+06	1.51423e+06	3.83364e+06	2.51505e+06	1.1903e+06	757552	1.26148e+06	1.56401e+06	6.83765e+06	719285	1.10999e+06	782880	633528	4.19011e+06	769522	1.13963e+06	609341	4.2219e+06	693313	1.04438e+06	642011	986745	944868	1.02567e+06	699028	1.76236e+06	1.13466e+06	767633	790344	774853	825178	704773	659276	885388	1.43578e+06	1.1714e+06	885460	1.6617e+06	940273	707762
HexCer t42:4_30.19	HexCer t42:4	30.19	C48 H87 N O9	6.64	821.644	822.651	[M+H]+1	1.52538e+07	8.79123e+06	1.32522e+07	9.83365e+06	1.52726e+07	2.07882e+07	9.8389e+06	7.02152e+06	1.2998e+07	1.82785e+07	3.84475e+07	7.32107e+06	4.2267e+06	1.27672e+07	2.16859e+07	1.87834e+07	7.66167e+06	7.62487e+06	6.51614e+06	1.86199e+07	7.21777e+06	8.26838e+06	4.31491e+06	8.96393e+06	1.08531e+07	1.28036e+07	1.10316e+07	2.53445e+07	2.30508e+07	6.01831e+06	2.47951e+07	9.03985e+06	5.44626e+06	1.25718e+07	9.07891e+06	1.94689e+07	2.04664e+07	7.52222e+06	8.28384e+06	7.92057e+06	1.21821e+07	1.56888e+07
HexCer t42:7_26.54	HexCer t42:7	26.54	C48 H81 N O9	4.83	815.595	814.588	[M-H]-1	1.48439e+07	1.00118e+07	1.54682e+07	6.70537e+06	1.65448e+07	2.1005e+07	8.23002e+06	9.43877e+06	1.89759e+07	2.3881e+07	3.41683e+07	7.53791e+06	5.96832e+06	1.08611e+07	1.57551e+07	2.00978e+07	7.2339e+06	1.14641e+07	8.61948e+06	2.07659e+07	1.06441e+07	8.84097e+06	7.0473e+06	9.55767e+06	1.06215e+07	1.19407e+07	1.05114e+07	4.4317e+07	1.06444e+07	6.24227e+06	1.76574e+07	9.33825e+06	5.32723e+06	1.33527e+07	9.19164e+06	1.57592e+07	1.11231e+07	1.41193e+07	8.31931e+06	1.28532e+07	1.06524e+07	1.36345e+07
HexCer t43:0_35.05	HexCer t43:0	35.05	C49 H97 N O9	3.67	843.719	844.727	[M+H]+1	368670	532039	1.10737e+06	839252	240846	333425	813448	332211	587975	417503	364440	596728	540226	454793	376425	463194	678319	869869	549583	588534	728919	624959	466811	546748	434392	798566	442658	851780	620983	439991	636687	578556	492621	515545	350436	700065	703133	471281	619913	875938	630052	667444
HexCer t43:0_36.95	HexCer t43:0	36.95	C49 H97 N O9	7.55	843.723	844.73	[M+H]+1	1.1864e+08	1.05177e+09	6.32398e+08	2.62636e+08	2.25475e+07	6.78487e+07	6.13255e+08	4.91802e+08	7.43787e+08	1.96772e+08	7.85483e+07	4.66913e+08	6.13187e+08	2.19801e+08	3.71541e+08	2.27409e+08	6.45813e+08	4.89807e+08	2.82733e+08	4.39881e+07	3.48621e+08	4.07481e+08	3.08412e+08	2.27186e+08	5.66051e+08	7.2008e+08	3.91103e+08	1.01813e+09	2.42682e+08	1.30528e+08	2.92001e+08	1.28622e+08	2.47812e+08	3.01959e+08	1.21249e+08	1.61346e+08	3.81144e+08	3.10319e+08	1.7943e+08	1.22667e+09	3.90282e+08	6.45227e+08
HexCer t43:1_33.17	HexCer t43:1	33.17	C49 H95 N O9	3.3	841.703	842.709	[M+H]+1	248035	371785	523190	501443	263600	289384	552526	237489	397057	386782	326346	275496	334654	323170	209679	325405	369608	292045	307916	388755	303779	315352	228383	254668	365535	437353	256077	396598	665534	232659	652171	253015	291683	454614	204350	285069	339259	291630	354776	445026	365340	415394
HexCer t43:1_35.79	HexCer t43:1	35.79	C49 H95 N O9	8.69	841.708	842.715	[M+H]+1	2.41113e+06	1.41728e+07	8.93119e+06	9.34277e+06	428262	2.34787e+06	3.28526e+07	1.76719e+06	2.11429e+06	3.48124e+06	1.47902e+06	1.65568e+07	8.41951e+06	2.35598e+06	2.79275e+06	3.50237e+06	1.98452e+07	6.3472e+06	2.24143e+06	431245	4.9908e+06	9.30718e+06	2.05053e+06	8.86962e+06	1.14902e+07	2.47863e+07	5.63168e+06	4.14438e+07	2.21765e+06	2.28586e+06	9.48328e+06	2.41678e+06	2.23185e+06	3.35266e+06	402523	537553	6.82262e+06	3.52742e+06	2.24307e+06	3.3536e+07	1.04702e+07	5.15837e+06
HexCer t43:2_34.88	HexCer t43:2	34.88	C49 H93 N O9	7.86	839.692	840.699	[M+H]+1	1.15632e+06	2.04845e+06	5.11349e+06	2.96205e+07	415037	514153	1.51833e+06	634223	1.14359e+07	774569	579458	1.12278e+06	1.0293e+06	706882	1.78763e+06	759151	6.32059e+06	1.53412e+07	3.02276e+06	907681	952980	1.27022e+06	778356	781189	1.6052e+06	4.35801e+06	625668	2.76387e+06	1.15702e+06	742487	1.07622e+06	751799	2.80715e+06	972280	614880	1.10084e+06	2.63737e+06	796490	855117	2.01191e+06	1.40945e+06	1.11393e+06
HexCer t43:3_24.6	HexCer t43:3	24.6	C49 H91 N O9	-0.17	837.669	838.677	[M+H]+1	1.7415e+06	2.40479e+06	4.30339e+06	2.16154e+06	4.31879e+06	3.10713e+06	1.99311e+06	2.45776e+06	3.64161e+06	4.98518e+06	5.29919e+06	1.4192e+06	2.53119e+06	2.60557e+06	2.91869e+06	3.30401e+06	2.43891e+06	1.60455e+06	1.47323e+06	3.79549e+06	1.3524e+06	2.75371e+06	1.60898e+06	1.07322e+06	4.4396e+06	3.54853e+06	1.58609e+06	5.31633e+06	2.18673e+06	1.73674e+06	4.2096e+06	765037	1.44257e+06	2.81249e+06	1.78912e+06	1.98416e+06	1.29624e+06	2.8182e+06	1.97638e+06	3.97148e+06	2.88718e+06	1.61721e+06
HexCer t43:6_28.99	HexCer t43:6	28.99	C49 H85 N O9	-4.86	831.618	832.626	[M+H]+1	425562	611737	1.20512e+06	788803	524365	406605	1.04368e+06	429090	858318	701623	642482	440122	670605	461731	455022	655746	720622	592775	452178	591834	405052	717005	391085	370363	572252	1.06698e+06	366613	782042	718036	390669	693202	251450	310102	434449	1.12656e+06	747348	604923	512773	360925	858043	533654	670631
HexCer t43:6_12.96	HexCer t43:6	12.96	C49 H85 N O9	7.85	831.629	832.636	[M+H]+1	810098	1.07994e+06	694707	826665	1.19446e+06	1.35876e+06	1.50189e+06	716168	1.80084e+06	1.06374e+06	744827	1.1065e+06	810709	829013	1.44629e+06	1.19104e+06	1.09438e+06	266771	1.21948e+06	1.08745e+06	768249	5.37855e+06	1.19714e+06	1.87241e+06	1.63673e+06	651376	1.1522e+06	2.86998e+06	2.79527e+06	2.03934e+06	1.33761e+06	961148	840672	1.09056e+06	1.27929e+06	498404	1.06881e+06	705608	1.62707e+06	2.07475e+06	590424	1.26546e+06
HexCer t43:7_27.85	HexCer t43:7	27.85	C49 H83 N O9	-2.3	829.605	828.598	[M-H]-1	1.35834e+09	1.5595e+09	2.00967e+09	1.48418e+09	2.84082e+09	1.44607e+09	1.3935e+09	1.13387e+09	1.96096e+09	2.86798e+09	2.34673e+09	8.57038e+08	1.0907e+09	1.09295e+09	1.69114e+09	2.34163e+09	1.53696e+09	1.53357e+09	1.18935e+09	1.84404e+09	1.14365e+09	9.56454e+08	7.67694e+08	1.52275e+09	1.47353e+09	1.93127e+09	1.19528e+09	3.64457e+09	1.31857e+09	1.27639e+09	1.51919e+09	1.11728e+09	7.5636e+08	7.83494e+08	1.21224e+09	1.06826e+09	1.10811e+09	1.2073e+09	1.0593e+09	2.31582e+09	1.16294e+09	1.05368e+09
HexCer t44:0_36.92	HexCer t44:0	36.92	C50 H99 N O9	-2.92	857.729	858.737	[M+H]+1	1.03709e+07	1.24653e+08	6.23232e+07	1.08854e+08	1.24134e+06	8.72941e+06	1.13451e+07	1.90193e+07	1.54398e+08	3.10667e+07	8.15931e+06	2.34538e+07	3.93951e+07	9.91927e+06	1.86408e+07	5.74597e+06	1.06179e+08	1.13129e+08	5.56997e+07	4.07225e+07	9.85895e+06	2.04298e+07	6.47587e+07	1.15934e+07	8.08941e+07	2.43038e+08	1.0583e+07	2.25678e+07	4.29918e+07	1.89934e+07	8.19451e+07	2.26833e+07	3.47066e+07	9.47899e+07	2.76112e+07	5.25412e+07	6.31564e+07	2.59029e+07	1.56291e+07	8.19453e+07	5.60736e+07	1.17968e+08
HexCer t44:0_37.68	HexCer t44:0	37.68	C50 H99 N O9	7.61	857.739	858.746	[M+H]+1	3.28432e+07	1.73482e+08	1.0709e+08	6.88645e+07	1.17832e+07	2.88251e+07	2.28825e+08	9.28385e+07	8.23803e+07	7.35954e+07	1.92838e+07	1.0761e+08	1.48405e+08	7.19504e+07	7.53706e+07	7.23158e+07	9.44414e+07	1.53554e+08	1.25254e+08	2.37261e+07	7.88543e+07	1.15302e+08	4.25662e+07	8.02547e+07	1.32848e+08	1.01798e+08	7.10315e+07	2.52586e+08	7.95995e+07	3.49144e+07	9.58024e+07	2.61064e+07	9.36851e+07	6.81828e+07	2.1758e+07	6.29833e+07	7.91268e+07	8.03615e+07	5.59878e+07	2.30571e+08	2.16249e+08	1.22716e+08
HexCer t44:3_28.24	HexCer t44:3	28.24	C50 H93 N O9	-0.2	851.685	852.692	[M+H]+1	358922	448680	771725	1.02802e+06	503941	454696	397654	371429	757108	1.0309e+06	818901	252153	312116	393871	619734	680934	711455	471875	349150	472641	260495	302508	327444	326289	452530	698437	312569	946033	411259	432613	496772	240705	378544	346682	259032	357760	408932	604140	344490	883100	435117	318271
HexCer t44:5_23.33	HexCer t44:5	23.33	C50 H89 N O9	-2.59	847.652	848.659	[M+H]+1	471053	897117	1.4869e+06	1.24442e+06	812335	731548	1.25164e+06	1.32185e+06	1.13867e+06	1.97739e+06	779091	386656	1.29719e+06	520243	625074	1.008e+06	932924	1.12285e+06	863456	858593	605224	520103	432936	838495	1.00832e+06	1.44418e+06	462796	1.95742e+06	1.26671e+06	556613	1.11077e+06	777403	549792	848740	610825	981724	723202	1.15633e+06	517231	1.11972e+06	791290	955002
HexCer t44:5_32.15	HexCer t44:5	32.15	C50 H89 N O9	4.1	847.657	846.65	[M-H]-1	2.12129e+07	1.47771e+07	3.37595e+07	1.62909e+07	7.53902e+06	1.20251e+07	1.76278e+07	1.91163e+07	3.60636e+07	1.55121e+07	2.75296e+07	4.64958e+06	2.21901e+07	2.54551e+07	1.12577e+07	2.71511e+07	3.69322e+07	2.26597e+07	1.65385e+07	6.10761e+07	2.33083e+07	1.96098e+07	1.06385e+07	1.68439e+07	3.15837e+07	2.1738e+07	1.601e+07	6.15456e+07	5.59731e+07	2.57862e+07	4.14088e+07	1.861e+07	1.056e+07	1.45863e+07	2.26796e+07	2.67292e+07	4.29903e+07	3.41075e+07	2.02403e+07	2.32986e+07	3.30539e+07	1.78889e+07
HexCer t44:5_30.79	HexCer t44:5	30.79	C50 H89 N O9	4.61	847.658	846.65	[M-H]-1	167199	164705	178911	179979	154131	185888	158756	139405	205724	227201	208129	132457	129243	146773	143859	185203	165424	133566	125207	245068	142260	141103	141202	139096	187966	170726	125863	210052	211860	132340	209189	123037	164917	180981	156478	135441	125437	171267	137085	250898	138750	181488
HexCer t44:6_9.58	HexCer t44:6	9.58	C50 H87 N O9	7.76	845.645	846.652	[M+H]+1	1.57456e+06	443649	694802	485721	1.72314e+06	1.15292e+06	955714	398116	684811	1.69965e+06	1.36e+06	1.86566e+06	419870	617236	676250	1.14582e+06	377182	329249	422068	1.20178e+06	364716	1.89209e+06	363584	360440	602301	643406	444669	1.61833e+06	422847	377966	576701	1.05686e+06	2.52919e+06	665390	364708	405847	403505	550379	280837	700328	357509	1.00378e+06
HexCer t45:2_34.18	HexCer t45:2	34.18	C51 H97 N O9	0.82	867.717	868.725	[M+H]+1	383709	261972	485385	292328	179821	189814	385653	185306	310040	275483	229659	328238	299960	211090	212597	254502	203728	261001	339683	287495	221555	471547	222435	284397	373345	477837	207816	324849	295210	238347	562465	247777	269187	407462	292723	406918	324505	239664	212752	390122	288144	654001
HexCer t45:4_33.8	HexCer t45:4	33.8	C51 H93 N O9	-4.2	863.681	862.674	[M-H]-1	109212	89683.1	117248	67568.4	62017.5	59833.8	76411.4	90194.8	115650	88133.2	74519.1	119085	101086	120704	89984.6	88437.7	119001	108581	98561.4	108527	93872	99700.2	82567.8	86664.2	117289	110797	90520.7	116164	167774	100847	134796	99305.4	112041	65922.3	106358	118190	116265	107665	125619	78520	112436	124722
HexCer t45:5_30.1	HexCer t45:5	30.1	C51 H91 N O9	-3.72	861.666	862.675	[M+H]+1	279720	238826	349065	323787	231816	268222	296265	264056	237125	237714	313990	269939	232957	256147	229300	245915	208483	232079	267724	253617	246655	280652	259371	285756	333955	323377	257869	283089	273738	254845	331836	299162	282355	333574	281155	262569	314228	313058	296613	272496	328932	248127
HexCer t45:5_33.02	HexCer t45:5	33.02	C51 H91 N O9	4.19	861.673	860.666	[M-H]-1	5.03422e+06	4.9176e+06	4.54912e+06	4.40714e+06	1.59998e+06	2.88334e+06	4.56619e+06	5.7988e+06	8.44482e+06	3.36356e+06	4.23967e+06	316785	7.93432e+06	6.07064e+06	3.05223e+06	6.94332e+06	7.56695e+06	1.81952e+06	3.716e+06	9.58247e+06	4.93372e+06	4.98506e+06	3.1081e+06	3.68359e+06	1.10226e+07	6.44307e+06	3.49942e+06	1.48204e+07	1.37462e+07	4.73178e+06	1.23451e+07	4.54456e+06	4.49485e+06	3.78511e+06	6.57518e+06	8.12053e+06	6.51502e+06	1.49177e+07	2.48231e+06	6.52424e+06	8.32518e+06	5.57639e+06
HexCer t45:7_27.1	HexCer t45:7	27.1	C51 H87 N O9	-1.61	857.637	858.644	[M+H]+1	465799	718828	922055	1.08317e+06	948434	457510	535482	520109	1.0036e+06	1.37862e+06	1.21451e+06	487723	596913	585056	639957	1.0044e+06	995895	750155	560700	1.03761e+06	626673	927064	555701	3.18952e+06	678050	1.51366e+06	511559	1.57904e+06	737554	559825	1.01946e+06	1.056e+06	690185	925595	905345	717893	630588	667000	588798	1.16338e+06	733920	806048
HexCer t46:1_37.11	HexCer t46:1	37.11	C52 H101 N O9	4.17	883.751	884.759	[M+H]+1	6.06692e+07	4.86379e+08	2.80078e+08	1.659e+08	1.06528e+07	7.02022e+07	7.92582e+07	7.20141e+07	1.80755e+08	1.34525e+08	6.4047e+07	1.97361e+08	1.66515e+08	7.67616e+07	4.73925e+07	5.15813e+07	2.6576e+08	1.85616e+08	1.64715e+08	3.36087e+08	9.09453e+07	1.97975e+08	2.29322e+08	5.66299e+07	2.30529e+08	6.7282e+08	8.82157e+07	1.19256e+08	3.0235e+08	5.45874e+07	3.544e+08	2.46166e+06	5.04021e+07	4.97346e+08	1.30617e+08	2.31591e+08	2.24722e+08	1.37531e+08	9.63153e+07	2.68149e+08	3.03935e+08	7.13306e+08
HexCer t46:1_38.36	HexCer t46:1	38.36	C52 H101 N O9	8.85	883.755	884.763	[M+H]+1	7.93875e+07	4.80336e+08	2.43961e+08	3.13016e+08	1.58433e+07	1.10827e+08	5.15616e+07	6.51817e+07	4.19736e+08	1.52118e+08	9.17957e+07	1.61419e+08	1.36087e+08	1.16657e+08	9.72952e+07	2.6139e+07	2.96053e+08	2.84738e+08	2.34684e+08	5.70601e+08	8.75792e+07	1.63606e+08	2.53818e+08	3.29376e+07	2.73508e+08	5.62102e+08	7.7319e+07	9.28144e+07	3.26659e+08	9.55904e+07	4.07122e+08	5.71901e+07	1.41156e+08	8.81899e+08	1.45604e+08	3.98114e+08	2.65377e+08	1.292e+08	1.19111e+08	2.36634e+08	2.54438e+08	7.93695e+08
HexCer t46:2_36.1	HexCer t46:2	36.1	C52 H99 N O9	-2.38	881.73	882.737	[M+H]+1	2.72009e+06	1.63263e+08	2.72418e+07	5.9615e+07	1.61706e+06	1.66612e+07	4.64122e+07	1.85175e+07	1.22462e+08	2.29227e+07	8.21537e+06	3.52584e+07	3.84629e+07	1.69183e+07	1.32547e+07	9.98205e+06	8.48375e+07	1.17383e+08	4.29979e+07	5.92355e+07	2.47851e+06	5.66023e+06	5.46529e+07	1.91942e+07	6.06559e+07	1.53036e+08	1.37618e+07	7.80414e+07	4.31901e+07	1.788e+07	7.68002e+07	2.51432e+07	3.12289e+06	1.14041e+08	2.74564e+07	4.23057e+07	3.78668e+07	3.58586e+07	7.63878e+06	1.08087e+08	8.57068e+06	1.01124e+08
HexCer t46:3_35.57	HexCer t46:3	35.57	C52 H97 N O9	-1.15	879.715	862.711	[M+H-H2O]+1	1.81683e+06	767593	2.54711e+06	992663	452304	1.12946e+06	667144	1.54928e+06	1.86993e+06	2.03585e+06	1.57438e+06	538659	3.45303e+06	2.54196e+06	1.39569e+06	2.27418e+06	2.63915e+06	1.3467e+06	3.00644e+07	3.18448e+06	1.82113e+06	959432	670352	2.36222e+06	3.74143e+07	2.58469e+06	1.04612e+06	3.39941e+06	3.39146e+06	2.42256e+06	1.65894e+06	2.32269e+06	1.2937e+06	1.6198e+06	2.79288e+06	1.74608e+07	3.24843e+06	3.90059e+06	1.90762e+06	1.85218e+06	1.49934e+06	900777
HexCer t46:4_34.06	HexCer t46:4	34.06	C52 H95 N O9	-6.55	877.695	878.702	[M+H]+1	839291	653162	923194	717841	521053	1.95754e+06	1.02736e+06	677664	796561	567565	1.15925e+06	871960	756514	658613	808380	633436	734920	643528	824788	827451	636304	1.05686e+06	636927	764248	922917	991205	539670	906667	1.61835e+06	716029	1.46105e+06	636029	630680	1.16251e+06	780219	958451	976596	1.0052e+06	614133	841613	896601	1.29308e+06
HexCer t46:4_32.83	HexCer t46:4	32.83	C52 H95 N O9	-0.89	877.7	876.693	[M-H]-1	117076	131374	143931	112878	140288	239198	85879.3	82953.5	135909	337800	116830	62857.2	104031	90129.9	64925.1	358986	88340.6	116914	110743	348213	156350	81972	88317.8	80074.1	147456	165648	111192	167411	254000	273067	86894.8	93223.5	116729	67033.1	76230.5	89942.3	76586.3	162740	221127	517821	90926.2	126493
HexCer t46:4_33.86	HexCer t46:4	33.86	C52 H95 N O9	-0.29	877.7	878.708	[M+H]+1	199922	147649	321887	205807	123832	144752	206313	135340	208455	154631	163300	206862	207108	144423	144661	161816	171986	176653	189079	235738	178877	264117	165394	178933	247960	249947	135628	196266	266486	238221	340368	172164	177595	188310	182237	197425	264812	247090	153916	256516	184465	314574
HexCer t46:5_28.15	HexCer t46:5	28.15	C52 H93 N O9	-1.38	875.684	876.691	[M+H]+1	213682	303902	503463	556058	375053	314674	318280	241949	444508	597754	576779	279308	252174	299022	470615	387364	466651	335453	277680	331455	274770	234823	272594	237360	336296	505946	229827	555718	259623	240466	398290	205670	274380	252172	207171	264658	285643	302288	292184	556393	243705	265599
HexCer t46:5_32.98	HexCer t46:5	32.98	C52 H93 N O9	2.14	875.687	874.68	[M-H]-1	56457.8	53894.5	67494.1	58995.6	31531.1	44509.8	52652.3	56536.2	67043.9	47043.8	32570.4	45139.4	69827.2	99756.5	50029.6	53333.1	68580.2	53334.1	64655.3	69888.4	60046.4	65020.9	69104.4	65026.2	65793.3	87157.9	61241.1	61952.3	66372.7	60176.6	79646.8	67232.4	58892.5	53571	70881.3	77554.7	67297.9	90489.5	73427.1	52978.6	68238.1	75623.7
HexCer t46:6_31.84	HexCer t46:6	31.84	C52 H91 N O9	8.51	873.677	872.666	[M-H]-1	5.26367e+06	3.66187e+06	8.7281e+06	4.32932e+06	1.06309e+07	8.59779e+06	4.69683e+06	3.73681e+06	5.51235e+06	9.0375e+06	1.18931e+07	2.20998e+06	3.98816e+06	4.25244e+06	4.65119e+06	8.39891e+06	5.96282e+06	7.23713e+06	3.23958e+06	1.14601e+07	4.87421e+06	3.66428e+06	3.00961e+06	1.01118e+07	5.12991e+06	3.97891e+06	4.15317e+06	1.42009e+07	6.63213e+06	4.68854e+06	7.09585e+06	4.48499e+06	3.48939e+06	9.52725e+06	5.30481e+06	4.42554e+06	7.18099e+06	8.38334e+06	3.9112e+06	7.99573e+06	4.14066e+06	2.58406e+06
HexCer t47:0_39.07	HexCer t47:0	39.07	C53 H105 N O9	-3.95	899.775	900.783	[M+H]+1	6.21048e+06	6.31574e+06	7.87379e+06	6.2527e+06	3.27899e+06	3.19849e+06	5.72855e+06	6.8859e+07	7.70574e+06	5.63849e+06	5.37028e+06	5.2731e+06	5.32425e+06	5.00064e+06	4.86735e+06	4.22152e+06	7.76986e+06	6.54544e+06	6.78884e+06	5.35401e+06	4.2705e+06	5.75767e+06	6.0036e+06	1.0898e+07	6.27892e+06	8.06438e+06	4.97625e+06	5.87311e+06	6.73855e+06	7.56718e+06	6.94769e+06	4.61325e+06	4.37294e+06	7.3009e+06	7.61504e+06	5.45681e+06	5.95247e+06	6.82425e+06	4.54561e+06	6.51405e+06	5.97185e+06	6.34848e+06
HexCer t47:0_39.59	HexCer t47:0	39.59	C53 H105 N O9	6.65	899.785	900.792	[M+H]+1	7.51874e+09	5.18336e+09	8.11397e+09	3.95277e+09	3.40689e+09	3.66547e+09	1.5937e+10	7.43474e+09	6.1622e+09	1.27646e+10	5.03345e+09	1.47428e+10	5.69938e+09	6.46189e+09	6.71972e+09	1.18271e+10	5.20979e+09	6.03565e+09	3.77993e+09	7.2134e+09	8.37719e+09	1.22904e+10	7.41358e+09	9.79876e+09	7.59051e+09	9.58294e+09	7.2897e+09	8.1848e+09	6.2926e+09	8.80447e+09	8.04211e+09	2.71538e+09	1.94634e+09	3.91048e+09	4.49444e+09	4.81215e+09	5.49448e+09	8.88848e+09	1.09042e+10	1.4428e+10	7.40027e+09	1.64968e+10
HexCer t47:1_39.09	HexCer t47:1	39.09	C53 H103 N O9	6.77	897.769	898.777	[M+H]+1	7.88169e+08	1.37376e+09	3.91464e+09	1.65441e+09	4.80841e+08	1.26907e+09	1.32156e+09	1.52061e+09	1.78595e+09	1.37776e+09	1.78121e+09	1.70501e+09	1.17333e+09	1.48876e+09	1.14719e+09	8.06934e+08	1.33099e+09	1.82896e+09	3.18233e+09	1.15768e+09	8.19919e+08	1.93111e+09	1.7977e+09	1.18104e+09	1.73328e+09	1.91755e+09	1.12206e+09	6.94648e+08	2.80052e+09	3.73769e+08	1.81496e+09	3.16643e+08	4.87073e+08	3.59058e+09	7.8634e+08	2.79706e+09	2.09255e+09	1.70861e+09	1.33097e+09	1.17678e+09	1.71648e+09	2.31543e+09
HexCer t47:4_35.68	HexCer t47:4	35.68	C53 H97 N O9	4.62	891.72	892.728	[M+H]+1	3.17287e+06	7.3358e+06	1.80214e+07	4.12545e+07	1.23473e+06	3.83695e+06	6.84211e+07	9.42689e+06	1.50647e+07	8.29681e+06	2.88473e+06	3.06827e+07	1.3182e+07	5.76658e+06	9.00264e+06	5.05706e+06	5.01343e+07	2.73869e+07	1.21755e+07	3.50238e+06	7.82548e+06	1.37663e+07	9.25289e+06	1.11821e+07	1.60751e+07	2.11712e+07	2.53992e+06	1.83354e+07	6.7266e+06	8.16267e+06	1.43099e+07	1.69576e+06	2.02069e+06	1.66084e+07	3.49336e+06	5.91405e+06	7.63047e+06	5.88327e+06	4.76201e+06	4.53348e+07	1.59266e+07	2.06559e+07
HexCer t47:5_30.34	HexCer t47:5	30.34	C53 H95 N O9	-0.49	889.7	890.708	[M+H]+1	206334	185874	250073	235820	287661	252189	251776	242510	226971	252827	267706	243992	268405	317179	184171	222601	205250	223037	193444	270216	283028	241793	230211	215569	293249	253798	250400	356903	263103	192758	300882	234849	301042	246212	231098	256374	286810	318487	238879	258610	224394	213543
HexCer t47:5_34.2	HexCer t47:5	34.2	C53 H95 N O9	-0.29	889.7	890.708	[M+H]+1	389939	338468	627117	377688	214714	245240	498263	239415	400572	313779	296719	424083	387548	223028	274675	330586	317617	310743	438870	371443	286248	609238	287386	345734	482361	617366	268498	389560	369770	307944	726704	236439	347789	352976	378197	458647	419260	309645	274876	504037	372282	654218
HexCer t48:0_39.53	HexCer t48:0	39.53	C54 H107 N O9	-1.82	913.793	914.8	[M+H]+1	8.00864e+08	9.11057e+08	4.80119e+08	6.42414e+08	5.3659e+08	7.44478e+08	8.13683e+08	7.15027e+08	1.04264e+09	7.08987e+08	9.18319e+08	9.92367e+08	1.03881e+09	8.28908e+08	9.56536e+08	8.13117e+08	7.6975e+08	9.39104e+08	1.02741e+09	1.15458e+09	8.74244e+08	1.41697e+09	7.5009e+08	9.32941e+08	7.50722e+08	7.4252e+08	1.03281e+09	8.26626e+08	1.4858e+09	6.15843e+08	1.00357e+09	4.66984e+08	6.59832e+08	9.23949e+08	7.67177e+08	9.98567e+08	1.01838e+09	7.26867e+08	6.83764e+08	7.13926e+08	1.10567e+09	1.20144e+09
HexCer t48:0_31.16	HexCer t48:0	31.16	C54 H107 N O9	6.83	913.801	914.808	[M+H]+1	59263.9	81728.7	121957	132836	97395.6	67980.4	116626	60706.4	85266.2	106264	103326	88179.7	73108.4	62454	68728.1	82946	80000.8	80224.2	75435.9	85700.5	57802.1	83306.7	63485.2	64386.3	91000.4	132017	60350.3	115633	89561.9	63787.3	114345	68104.6	61505.6	76992.3	67250.6	81627.9	96657.3	78526.7	67466.5	108070	70211.3	83729.5
HexCer t48:3_35.9	HexCer t48:3	35.9	C54 H101 N O9	-2.09	907.746	908.753	[M+H]+1	1.10239e+08	1.80644e+08	1.44697e+08	2.83982e+07	7.91202e+06	7.0981e+07	1.00613e+08	5.83083e+07	9.12799e+07	7.18423e+07	6.13904e+07	1.8082e+08	1.54404e+08	4.47171e+07	4.44417e+07	8.47218e+07	9.20166e+07	3.53073e+07	3.36434e+07	3.61268e+08	9.81858e+07	2.43789e+08	1.48596e+08	8.04603e+07	1.34379e+08	1.85377e+08	1.05791e+08	1.94018e+08	1.8894e+08	4.04619e+07	2.83749e+08	6.58769e+06	2.97335e+07	2.73947e+08	8.54528e+07	1.21459e+08	1.27116e+08	1.22249e+08	7.25444e+07	2.67312e+08	2.43721e+08	5.54959e+08
HexCer t48:4_35.4	HexCer t48:4	35.4	C54 H99 N O9	-1.75	905.73	906.738	[M+H]+1	130050	210955	321130	282305	119244	119439	847152	163288	213401	147720	124530	237013	212465	117216	181290	154235	261471	276149	165159	168379	175926	322684	168954	180247	233057	387295	166536	301289	209639	177758	322054	167888	171248	300403	123394	214269	242082	190353	145330	317913	187066	309416
HexCer t48:4_36.73	HexCer t48:4	36.73	C54 H99 N O9	-0.47	905.732	906.739	[M+H]+1	1.27569e+06	2.69958e+06	2.25793e+06	2.29083e+06	776764	1.31135e+06	3.76636e+06	2.14421e+06	1.72319e+06	994989	1.01828e+06	2.41119e+06	2.16632e+06	1.61583e+06	1.85063e+06	1.19794e+06	2.10869e+06	1.67746e+06	1.24096e+06	1.12962e+06	2.75895e+06	2.79582e+06	1.61355e+06	2.11303e+06	2.48468e+06	2.23578e+06	2.41369e+06	2.29225e+06	1.57532e+06	1.55606e+06	2.08503e+06	1.48577e+06	1.66151e+06	2.09322e+06	1.62606e+06	2.02364e+06	2.80266e+06	2.06283e+06	1.75514e+06	2.69079e+06	2.69995e+06	2.29194e+06
HexCer t48:5_34.22	HexCer t48:5	34.22	C54 H97 N O9	-1.39	903.715	904.722	[M+H]+1	315788	320777	605775	361675	196523	237330	505776	209247	364429	257073	239045	403307	355382	225902	224423	482006	326337	309863	376143	369661	291691	577968	285404	263769	371394	615618	255372	494019	370468	269522	681559	221763	303753	351977	248914	309965	358744	308769	279962	502611	371228	652366
LacCer d30:0_23.41	LacCer d30:0	23.41	C42 H81 N O13	-2.79	807.569	808.576	[M+H]+1	1.28997e+08	1.56851e+08	3.24441e+08	9.66918e+07	1.78584e+08	2.1399e+08	9.68586e+07	6.4747e+07	1.80138e+08	4.16613e+08	2.32775e+08	1.10627e+08	1.25658e+08	9.01247e+07	1.43833e+08	3.07757e+08	1.52959e+08	1.55419e+08	1.172e+08	2.39658e+08	8.24153e+07	6.48733e+07	8.23268e+07	1.92116e+08	1.28317e+08	1.95087e+08	6.56181e+07	5.18757e+08	2.1627e+08	5.48261e+07	1.54161e+08	8.35252e+07	8.63969e+07	1.13156e+08	9.33288e+07	2.13616e+08	1.17655e+08	1.7919e+08	6.01841e+07	3.20485e+08	1.51859e+08	1.39591e+08
LacCer d32:0_23.39	LacCer d32:0	23.39	C44 H85 N O13	-0.09	835.602	836.61	[M+H]+1	434933	784685	1.42968e+06	1.19653e+06	781073	620509	1.20347e+06	763103	1.09485e+06	1.64052e+06	749109	355772	755618	500222	558063	863316	782442	719072	560120	759057	524419	500087	403023	605202	969518	1.3886e+06	354426	1.82127e+06	1.21796e+06	487431	1.06802e+06	486938	542305	507610	447764	858321	695370	1.11183e+06	497326	1.21668e+06	605448	558223
LacCer d32:1_22.43	LacCer d32:1	22.43	C44 H83 N O13	0.02	833.586	834.594	[M+H]+1	932700	875682	878803	701653	2.36348e+06	1.96024e+06	725332	966247	1.80531e+06	4.38872e+06	3.78629e+06	827820	616011	985705	958169	1.19889e+06	941291	677475	835179	1.13172e+06	740531	441634	943120	882706	1.28248e+06	1.22282e+06	1.51749e+06	3.77077e+06	1.38403e+06	532094	3.60042e+06	875558	835040	422833	362715	1.12936e+06	1.65717e+06	1.69361e+06	951429	1.16482e+06	791901	1.2784e+06
LacCer d32:4_28.73	LacCer d32:4	28.73	C44 H77 N O13	3.96	827.543	828.55	[M+H]+1	284602	343141	606533	535922	386824	402966	456085	305161	538101	562032	598526	270254	254383	270001	382671	397793	466113	410109	311862	391471	257138	332229	291114	236335	364012	661925	237789	610736	428888	225458	477762	274362	266633	433281	228167	434891	402644	380850	253362	533999	361209	421683
LacCer d33:0_33.01	LacCer d33:0	33.01	C45 H87 N O13	-4.01	849.614	848.607	[M-H]-1	96716.8	93171.5	111138	96677.2	56687.7	82897.5	91356.3	104901	87701.7	79163	60832.9	82066.1	124768	120225	69566.5	83664.7	113830	79664.6	121351	118290	93289.6	115225	101275	96593.4	122528	123728	95956.6	99415.2	126907	104071	132629	122613	110681	91354.6	101163	122546	97644.9	122643	121074	99350.1	139676	101154
LacCer d33:1_12.1	LacCer d33:1	12.1	C45 H85 N O13	-3.63	847.599	848.606	[M+H]+1	5.34982e+06	6.33949e+06	7.38685e+06	2.90786e+06	7.72162e+06	3.74686e+06	5.75065e+06	6.74446e+06	1.16907e+07	1.0315e+07	1.00672e+07	4.64662e+06	8.46327e+06	9.17447e+06	6.37856e+06	6.08583e+06	6.79377e+06	5.28638e+06	230766	191187	167714	9.03404e+06	226641	203175	206870	5.57654e+06	7.69317e+06	7.43125e+06	9.69158e+06	9.68643e+06	9.12147e+06	7.93122e+06	1.16108e+07	237109	213294	222938	251593	236289	1.12863e+07	7.73501e+06	1.13974e+07	7.82949e+06
LacCer d33:1_23.78	LacCer d33:1	23.78	C45 H85 N O13	-0.39	847.602	848.609	[M+H]+1	530512	413895	823937	766065	970481	514127	561990	364884	952776	955164	882627	486042	506073	354094	528139	1.20585e+06	547985	394629	452121	588042	607381	406172	330620	606969	619187	627357	384660	1.6915e+06	1.60345e+06	478225	1.88623e+06	548257	719241	415022	447934	463697	523166	465396	374456	865204	559372	456988
LacCer d34:1_25.02	LacCer d34:1	25.02	C46 H87 N O13	0.21	861.618	862.625	[M+H]+1	9.14518e+07	2.55089e+07	7.00996e+07	1.96696e+07	1.01007e+08	4.1545e+07	2.81598e+07	3.71237e+07	4.20661e+07	8.08657e+07	1.18713e+08	2.56834e+07	3.56242e+07	3.36021e+07	3.61611e+07	9.64002e+07	4.75113e+07	4.63481e+07	4.12143e+07	5.03881e+07	4.24042e+07	3.38991e+07	2.28751e+07	7.10635e+07	6.36108e+07	6.94822e+07	5.04839e+07	1.87093e+08	6.81544e+07	2.51222e+07	1.0372e+08	4.18968e+07	2.38393e+07	1.02014e+08	4.68361e+07	3.77334e+07	7.96287e+07	2.71253e+07	4.78296e+07	6.0394e+07	2.02002e+07	3.69502e+07
LacCer d34:5_22.91	LacCer d34:5	22.91	C46 H79 N O13	-4.12	853.552	854.559	[M+H]+1	703227	857896	870382	973079	1.17567e+06	955328	632259	1.18878e+06	1.24834e+06	2.95925e+06	1.35974e+06	634514	763746	655647	1.81583e+06	1.08592e+06	831465	850034	854436	843530	876730	791357	1.01492e+06	1.88526e+06	1.71185e+06	901499	730759	1.81895e+06	858404	638261	1.05674e+06	969265	1.10487e+06	901843	586368	893360	739699	781475	651789	1.07345e+06	875216	822317
LacCer d35:1_26.26	LacCer d35:1	26.26	C47 H89 N O13	-0.11	875.633	876.641	[M+H]+1	855830	1.09912e+06	2.87946e+06	3.20642e+06	1.80954e+06	1.53783e+06	996089	1.12999e+06	2.49513e+06	3.40028e+06	2.54711e+06	797405	999362	1.19154e+06	1.7509e+06	1.86728e+06	1.56003e+06	2.27287e+06	1.19837e+06	1.67338e+06	962343	777702	1.27967e+06	1.15357e+06	1.52142e+06	1.58996e+06	806206	3.21477e+06	1.21253e+06	1.30348e+06	1.82506e+06	1.14213e+06	1.10547e+06	800290	1.1879e+06	1.03563e+06	1.33557e+06	1.29795e+06	775123	2.23777e+06	844921	1.30549e+06
LacCer d36:0_37.56	LacCer d36:0	37.56	C48 H93 N O13	1.6	891.666	892.673	[M+H]+1	5.5959e+06	2.83579e+07	2.45795e+07	2.66042e+07	1.61597e+06	6.98957e+06	1.42464e+07	2.09776e+07	3.34392e+07	9.61333e+06	5.09372e+06	2.03565e+07	2.06348e+07	1.53499e+07	1.30246e+07	1.37517e+07	2.9333e+07	2.12171e+07	3.10148e+07	2.42651e+06	1.60736e+07	1.95986e+07	1.46613e+07	1.77187e+07	3.08676e+07	3.10097e+07	1.28798e+07	2.72879e+07	1.3069e+07	7.51548e+06	1.87543e+07	9.75229e+06	1.50009e+07	1.99083e+07	6.4881e+06	1.33652e+07	1.71899e+07	1.43708e+07	4.13848e+06	2.44163e+07	1.8805e+07	3.19441e+07
LacCer d36:0_33.57	LacCer d36:0	33.57	C48 H93 N O13	2.02	891.666	892.674	[M+H]+1	1.1575e+06	1.50039e+06	1.71478e+06	1.69764e+06	1.49116e+06	1.90559e+06	1.36419e+06	1.50175e+06	1.69282e+06	1.49588e+06	1.54867e+06	1.16691e+06	1.77288e+06	1.06481e+06	994399	1.34496e+06	1.44544e+06	1.75606e+06	1.4044e+06	1.95981e+06	1.35453e+06	1.36742e+06	1.11965e+06	1.35751e+06	1.48776e+06	1.71818e+06	1.01257e+06	2.24635e+06	2.02218e+06	1.43183e+06	1.31706e+06	1.12808e+06	1.41955e+06	1.32449e+06	1.40336e+06	1.46287e+06	2.57532e+06	2.03236e+06	1.38437e+06	1.4445e+06	1.45616e+06	1.71385e+06
LacCer d36:0_30.62	LacCer d36:0	30.62	C48 H93 N O13	2.87	891.667	890.66	[M-H]-1	5.23181e+06	4.25765e+06	5.76336e+06	4.46211e+06	8.93269e+06	8.91866e+06	3.73395e+06	4.13692e+06	7.65987e+06	1.15638e+07	1.58343e+07	6.11579e+06	1.01698e+06	6.77972e+06	7.23396e+06	9.65895e+06	3.1698e+06	2.99078e+06	3.89581e+06	1.06062e+07	5.44226e+06	2.18634e+06	3.0817e+06	3.50448e+06	4.65948e+06	6.0549e+06	4.6203e+06	1.90726e+07	8.98449e+06	2.4978e+06	1.67335e+07	4.98895e+06	4.16248e+06	7.05361e+06	2.73687e+06	5.69189e+06	5.3813e+06	5.45136e+06	3.75855e+06	6.074e+06	4.98068e+06	4.7448e+06
LacCer d36:1_24.82	LacCer d36:1	24.82	C48 H91 N O13	-0.13	889.649	890.656	[M+H]+1	1.36396e+06	1.7793e+06	2.63557e+06	2.06374e+06	4.93451e+06	2.72537e+06	1.32297e+06	1.56151e+06	2.64789e+06	4.14689e+06	4.6778e+06	646930	1.38183e+06	1.64639e+06	1.94891e+06	3.40371e+06	1.54899e+06	1.51005e+06	988470	3.58639e+06	1.50303e+06	999133	955376	1.51217e+06	1.8033e+06	2.0051e+06	1.59562e+06	4.11437e+06	2.65223e+06	1.08227e+06	3.04796e+06	1.3233e+06	1.28506e+06	2.22139e+06	1.48867e+06	1.31509e+06	1.34651e+06	1.82639e+06	1.2792e+06	2.52369e+06	1.48767e+06	1.13206e+06
LacCer d36:1_25.42	LacCer d36:1	25.42	C48 H91 N O13	-0.07	889.649	890.656	[M+H]+1	3.65065e+06	4.12711e+06	4.18108e+06	5.37538e+06	6.42605e+06	4.38505e+06	3.86317e+06	2.69453e+06	5.78679e+06	7.59166e+06	6.52635e+06	2.69417e+06	4.16985e+06	4.55099e+06	4.57009e+06	5.72038e+06	4.49606e+06	3.67021e+06	3.42351e+06	6.28965e+06	4.34887e+06	3.25642e+06	2.97278e+06	3.19983e+06	3.69003e+06	4.84551e+06	3.46202e+06	8.5965e+06	5.17902e+06	3.71648e+06	3.90457e+06	3.64034e+06	3.30023e+06	2.78538e+06	3.68708e+06	3.59316e+06	3.62049e+06	3.3185e+06	2.82004e+06	5.56395e+06	3.05334e+06	3.34721e+06
LacCer d36:3_30.33	LacCer d36:3	30.33	C48 H87 N O13	-8.33	885.61	884.603	[M-H]-1	131585	115102	350222	150427	189732	310357	130937	112305	179416	161286	278531	111355	156423	310502	114262	126986	310501	235313	293451	304942	152431	157214	136383	174831	474611	139243	126927	367369	389016	156134	382928	277613	147192	277220	124413	141496	149284	369837	216750	154410	155934	294830
LacCer d37:0_17.77	LacCer d37:0	17.77	C49 H95 N O13	-3.9	905.677	906.684	[M+H]+1	60091.7	58431.5	72654.1	70074.1	65686.6	60543.1	92339.9	49123.8	53192.8	52775.2	61808.3	58605.5	54572.9	55831.1	53284.7	60307.1	66306.6	68260.7	57672.8	75364.4	64079.5	63294.7	58313.8	63396.9	129732	68816.9	55168.2	57024.5	67725.7	53108.6	64068	62364.1	62581.4	63480.7	77622.6	74421.3	61503	80329.2	58445	60350.7	69731.8	59071.8
LacCer d37:2_29.68	LacCer d37:2	29.68	C49 H91 N O13	0.13	901.649	902.656	[M+H]+1	566228	561139	828101	995397	1.71637e+06	1.48906e+06	656105	558229	1.09506e+06	1.94981e+06	1.68081e+06	393845	488620	627653	948202	1.17574e+06	743142	691021	487063	1.03496e+06	487051	423483	514303	577360	745818	978670	527600	1.9808e+06	837365	481887	1.12443e+06	519307	580418	1.042e+06	498231	498087	740827	597853	506921	1.4854e+06	491562	540641
LacCer d38:0_28.63	LacCer d38:0	28.63	C50 H97 N O13	-9.65	919.687	920.694	[M+H]+1	430988	559842	952346	1.04647e+06	663977	533064	1.00385e+06	363793	933572	847541	960710	431960	441768	454080	663909	593743	738878	630716	543238	608134	373796	543927	411692	401300	723714	1.06506e+06	370255	1.25348e+06	744093	373020	887465	460921	498124	645748	472241	671975	538252	565937	363432	610140	466530	574648
LacCer d38:0_26.95	LacCer d38:0	26.95	C50 H97 N O13	-1.28	919.695	920.702	[M+H]+1	3.75003e+06	4.03032e+06	5.32486e+06	3.00718e+06	3.28445e+06	3.83562e+06	2.55843e+06	3.09457e+06	4.68147e+06	4.75234e+06	5.46891e+06	3.86082e+06	3.22441e+06	3.94823e+06	3.29492e+06	3.5931e+06	3.71344e+06	3.28394e+06	3.57627e+06	3.51758e+06	5.21559e+06	3.83771e+06	3.68074e+06	4.16752e+06	5.11983e+06	4.89374e+06	3.68333e+06	5.08124e+06	4.14462e+06	3.03268e+06	4.5171e+06	3.18202e+06	4.06855e+06	3.78446e+06	5.28325e+06	4.8824e+06	7.24081e+06	4.39716e+06	3.15729e+06	4.7989e+06	3.84134e+06	4.03486e+06
LacCer d38:2_31.19	LacCer d38:2	31.19	C50 H93 N O13	-1.47	915.663	914.656	[M-H]-1	364013	317082	1.29435e+06	449049	1.05682e+06	374842	438839	340928	952249	526509	1.56202e+06	371528	938838	676220	238426	1.07683e+06	885918	1.13489e+06	410104	2.2366e+06	401249	496999	221524	619984	1.08038e+06	1.06946e+06	374051	3.6319e+06	1.56436e+06	653955	1.21362e+06	590927	301318	640225	603569	1.03559e+06	1.03345e+06	909457	426135	1.33901e+06	501515	428904
LacCer d38:2_27.64	LacCer d38:2	27.64	C50 H93 N O13	0.91	915.666	916.673	[M+H]+1	7.35195e+06	7.05631e+06	5.86845e+06	5.99086e+06	6.98961e+06	7.71082e+06	6.94576e+06	6.9019e+06	8.18907e+06	7.33574e+06	7.2855e+06	6.20275e+06	7.69232e+06	7.542e+06	6.75357e+06	6.88602e+06	6.54815e+06	5.8249e+06	6.27545e+06	6.568e+06	7.15658e+06	7.22051e+06	7.11512e+06	6.81276e+06	6.21632e+06	6.22172e+06	6.72638e+06	7.83063e+06	7.03722e+06	6.21743e+06	7.38047e+06	7.63993e+06	8.1342e+06	7.02898e+06	6.48054e+06	6.13574e+06	8.27115e+06	8.3546e+06	6.87539e+06	8.07058e+06	7.03522e+06	6.71974e+06
LacCer d38:4_27.55	LacCer d38:4	27.55	C50 H89 N O13	-1.72	911.632	912.639	[M+H]+1	6.81637e+06	6.9189e+06	8.38513e+06	6.72954e+06	7.36299e+06	6.94944e+06	7.80219e+06	6.55102e+06	7.41443e+06	8.42854e+06	9.64294e+06	6.60771e+06	8.07881e+06	6.32031e+06	6.86442e+06	7.73507e+06	7.08861e+06	6.86895e+06	7.04922e+06	7.35267e+06	6.70971e+06	6.34482e+06	7.99242e+06	7.38707e+06	6.44916e+06	7.35995e+06	6.44894e+06	8.43743e+06	7.11597e+06	6.45221e+06	6.84247e+06	5.68478e+06	6.94752e+06	7.77905e+06	6.77862e+06	6.80353e+06	7.28032e+06	7.74916e+06	7.72313e+06	1.01912e+07	7.90267e+06	7.4179e+06
LacCer d39:2_30.1	LacCer d39:2	30.1	C51 H95 N O13	0.92	929.681	930.688	[M+H]+1	407598	348008	508644	481058	369543	390842	431705	384772	361858	355383	457534	395763	393974	373247	334127	358338	333444	350159	390117	369561	369803	422945	392456	416392	486626	401648	375756	412507	398880	371350	483538	435927	411437	486071	409688	392619	460664	456177	432213	397071	479308	361562
LacCer d40:1_30.07	LacCer d40:1	30.07	C52 H99 N O13	1.2	945.713	946.72	[M+H]+1	551232	433718	624591	794290	453782	530037	562346	526958	470999	551093	561831	590068	614938	503598	450588	566004	484045	514326	479046	589815	484085	574884	505066	647347	708184	493206	561124	570576	489806	620741	625096	610655	535299	668905	540501	724562	662393	765119	530738	487584	588567	443981
LacCer d40:1_39.02	LacCer d40:1	39.02	C52 H99 N O13	2.4	945.714	946.721	[M+H]+1	5.77386e+07	5.87502e+07	6.07058e+07	1.13213e+07	2.6517e+07	5.63925e+07	8.49063e+07	5.21858e+07	1.86218e+07	6.78962e+07	4.85796e+07	7.95471e+07	5.74272e+07	7.12948e+07	5.80088e+07	7.24459e+07	4.48579e+07	2.96657e+07	4.0812e+07	5.39564e+07	6.27298e+07	6.23005e+07	6.37041e+07	5.35028e+07	5.43266e+07	4.21745e+07	4.85689e+07	5.33752e+07	6.18821e+07	3.20767e+07	5.98573e+07	2.27205e+07	1.35101e+07	1.00749e+08	2.44701e+07	6.19776e+07	3.97455e+07	4.93226e+07	6.03209e+07	7.59597e+07	8.37445e+07	1.02553e+08
LacCer d40:2_33.05	LacCer d40:2	33.05	C52 H97 N O13	-1.28	943.695	942.688	[M-H]-1	969790	316361	1.62839e+06	742334	312876	387357	722187	481431	1.15273e+06	677235	596935	304981	1.64351e+06	1.09146e+06	418189	657376	1.41703e+06	1.13113e+06	609160	1.68293e+06	806226	639231	391201	968886	864584	1.07206e+06	469699	2.09848e+06	1.41314e+06	1.05691e+06	729003	970520	698915	901186	1.11397e+06	1.42259e+06	1.55164e+06	2.07063e+06	703314	922520	433185	558021
LacCer d40:3_28.76	LacCer d40:3	28.76	C52 H95 N O13	1.04	941.681	942.689	[M+H]+1	292497	352660	623359	608295	397556	414145	454907	313626	498931	577624	615130	277751	257820	277491	377943	408829	479044	447687	320513	402331	294364	836531	299190	267085	357597	1.57629e+06	244633	688164	426215	231713	2.99238e+06	281973	274030	445301	235503	446956	413814	391416	260391	548813	371230	2.43664e+06
LacCer d40:4_31.75	LacCer d40:4	31.75	C52 H93 N O13	-2.94	939.662	938.655	[M-H]-1	2.75429e+06	1.56122e+06	3.84195e+06	2.01632e+06	3.76692e+06	3.12742e+06	1.74652e+06	1.02852e+06	2.93259e+06	4.42314e+06	5.4484e+06	562627	1.5675e+06	2.14624e+06	2.16221e+06	3.01342e+06	2.23041e+06	3.54769e+06	1.1228e+06	3.34967e+06	1.7278e+06	1.91021e+06	1.16668e+06	2.99425e+06	1.79584e+06	1.55064e+06	1.23156e+06	5.29334e+06	2.622e+06	1.53707e+06	1.95701e+06	1.39423e+06	1.15848e+06	3.34151e+06	2.92611e+06	1.30697e+06	2.66609e+06	2.15747e+06	830559	3.66055e+06	1.08954e+06	778802
LacCer d40:5_30.19	LacCer d40:5	30.19	C52 H91 N O13	-9.21	937.64	936.633	[M-H]-1	155136	140587	157150	243398	122137	161570	164670	145957	201960	145850	167356	189758	161796	228905	153647	153570	227554	153062	144136	232107	172993	167588	205447	130159	237179	158762	158152	147122	212368	149775	190420	161440	204636	171009	159875	176100	319770	219753	219397	207370	210447	237255
LacCer d41:0_36.42	LacCer d41:0	36.42	C53 H103 N O13	6.88	961.75	962.757	[M+H]+1	301922	742749	702402	937152	127108	255909	746619	802830	555687	277508	190002	711889	492830	234162	676255	285626	1.05005e+06	979553	398223	188921	402972	754809	389920	520739	516306	986023	382273	887082	337111	246006	552300	268892	477190	751417	171400	328848	651384	513530	245112	912115	497848	546026
LacCer d41:0_34.17	LacCer d41:0	34.17	C53 H103 N O13	8.23	961.751	960.744	[M-H]-1	210490	205974	277752	190816	84812.6	120284	209833	165453	201879	277405	195765	181496	265202	180238	137946	177447	212354	195245	210797	178899	193387	187467	165255	174644	202235	189596	153393	285618	269366	163485	183925	165511	219266	163640	171224	181092	182792	198999	231696	217568	183250	230033
LacCer d41:1_36.38	LacCer d41:1	36.38	C53 H101 N O13	6.73	959.734	960.741	[M+H]+1	311414	862667	695223	1.08846e+06	166316	297226	867161	743831	662006	265630	220678	703984	572399	258327	783793	319512	1.24388e+06	942730	462517	213881	376174	723197	506334	587044	840469	861432	394294	1.0303e+06	368515	285724	4.07157e+06	254734	554233	872734	198002	345718	756551	596440	258715	1.0648e+06	553781	7.62506e+06
LacCer d41:4_30.61	LacCer d41:4	30.61	C53 H95 N O13	-1.72	953.679	954.686	[M+H]+1	611124	653449	873623	1.06704e+06	743429	889001	728056	754729	1.0169e+06	916918	825996	934405	890524	678363	592788	721662	733124	747569	740529	676225	822794	883896	913070	934114	872073	1.23904e+06	850234	1.04728e+06	865050	752158	737078	862193	977503	785249	787687	862029	921789	1.28216e+06	998167	824682	942540	775813
LacCer d41:5_32.8	LacCer d41:5	32.8	C53 H93 N O13	-5.39	951.66	950.652	[M-H]-1	134545	223524	177151	160447	99409.9	99625.8	113101	140444	166083	311590	82082.9	93758.5	178723	119620	120304	125516	161536	141081	181015	184856	143316	122802	143961	152075	142941	240037	125160	176576	150627	119952	120018	176840	184978	158076	141468	136431	94133.9	149673	138168	214515	151910	209639
LacCer d41:5_29.88	LacCer d41:5	29.88	C53 H93 N O13	8.97	951.673	950.666	[M-H]-1	359628	269211	347330	411489	489832	616715	313789	262321	610741	484856	719831	226844	291185	422057	340681	403359	462314	347392	265518	841371	374759	306176	349350	354454	475833	262846	258022	467832	414623	283929	364236	333413	321591	607394	309188	292136	338070	400013	355920	555397	306752	284267
LacCer d41:6_31.15	LacCer d41:6	31.15	C53 H91 N O13	-4.54	949.645	948.637	[M-H]-1	73002.2	67435.3	71839	89230	134368	89839.4	75124.5	77126.6	109250	107347	111202	82380	76070.3	100664	62575.4	100682	95865.2	78256.7	63736.1	117859	70571.7	69730.8	67643.3	69192.4	106244	89206	86378.5	112971	107737	70284.1	119323	70354.7	76766.5	78749.2	74676.8	77358.9	76999.5	88285.6	92229.9	111481	97024.8	79418
LacCer d42:3_34.02	LacCer d42:3	34.02	C54 H99 N O13	0.99	969.713	968.705	[M-H]-1	371276	221305	268768	179269	147486	179594	244476	265645	352793	198843	242654	204082	317379	330449	227727	237667	338226	248217	255972	309632	228130	284533	229633	232874	279253	268078	233963	321091	437515	301507	293173	236849	320042	163661	328970	316264	261972	363868	309912	224077	290546	263149
LacCer d42:5_36.33	LacCer d42:5	36.33	C54 H95 N O13	2.97	965.683	966.69	[M+H]+1	2.55475e+06	8.8536e+06	8.96843e+06	2.80263e+06	593117	4.57642e+06	2.38099e+07	1.3832e+07	4.72346e+06	2.05171e+06	2.06721e+06	1.18206e+07	1.73159e+07	3.9708e+06	6.35199e+06	6.27815e+06	3.46175e+06	6.31286e+06	3.18978e+06	884878	5.49614e+06	2.30797e+07	6.47698e+06	1.57877e+07	1.87191e+07	9.00759e+06	1.3703e+07	1.90504e+07	5.98967e+06	1.41119e+06	6.70157e+06	2.60944e+06	2.3943e+06	1.86348e+07	2.81978e+06	3.27327e+06	1.94802e+06	1.45796e+07	3.5449e+06	1.58252e+07	7.88457e+06	4.3431e+06
LacCer d42:6_28.19	LacCer d42:6	28.19	C54 H93 N O13	-0.73	963.664	964.671	[M+H]+1	391560	611370	967327	919888	591208	463393	465315	482987	939667	1.4047e+06	858706	382426	373481	455123	841783	888435	734087	611059	410664	638323	376212	365829	399759	444601	496781	706517	376531	1.0089e+06	425615	385725	676901	293757	515803	351421	332174	393033	475177	544659	425389	876923	409517	392315
LacCer d42:6_27.68	LacCer d42:6	27.68	C54 H93 N O13	-0.53	963.664	964.67	[M+H]+1	5.01471e+06	4.81305e+06	3.98873e+06	4.08631e+06	4.76755e+06	5.25949e+06	4.76234e+06	4.70773e+06	5.5857e+06	5.00365e+06	4.96938e+06	4.23084e+06	5.24687e+06	5.14434e+06	4.60655e+06	4.69689e+06	4.46644e+06	3.97311e+06	4.28043e+06	4.47998e+06	4.88144e+06	4.92505e+06	4.1303e+06	4.64692e+06	4.2401e+06	4.24378e+06	4.58801e+06	5.34121e+06	4.80003e+06	4.24086e+06	5.03415e+06	5.21113e+06	5.54827e+06	4.79441e+06	4.42032e+06	4.18513e+06	5.64168e+06	5.6986e+06	4.66881e+06	5.50487e+06	4.76438e+06	4.58348e+06
LacCer d42:6_3.65	LacCer d42:6	3.65	C54 H93 N O13	7.14	963.672	964.679	[M+H]+1	4.05208e+06	3.78092e+06	5.4764e+06	4.9456e+06	5.67124e+06	6.11327e+06	3.74792e+06	5.81698e+06	3.00645e+06	3.05589e+06	3.81621e+06	6.34273e+06	6.10803e+06	4.17136e+06	4.41465e+06	4.6358e+06	3.66024e+06	3.93209e+06	71724.4	99622.8	79784.7	7.02912e+06	67943.8	79237.9	71182.7	3.44495e+06	4.31512e+06	5.25072e+06	2.65523e+06	8.51634e+06	8.7399e+06	1.67233e+06	7.13252e+06	72847.6	59432	59730.8	57796.7	57388	5.26041e+06	7.16899e+06	6.29135e+06	8.47269e+06
LacCer d43:1_35.37	LacCer d43:1	35.37	C55 H105 N O13	9.87	987.768	986.761	[M-H]-1	413260	328413	559284	362871	178798	275378	439335	167201	308490	213073	207057	228186	316127	289024	258964	158765	240826	229474	312962	281266	276389	265204	285371	279268	324996	248367	334168	263096	444416	322773	232934	368485	225211	315193	289428	270724	341448	210644	574210	217188	215204	218770
LacCer d43:3_31.07	LacCer d43:3	31.07	C55 H101 N O13	5.33	983.733	984.74	[M+H]+1	64459	98611.5	136166	204768	69283	51607.8	114724	67646.8	100190	101825	65832.4	98244.1	77782.5	72270	67467.8	78554.3	102089	104893	99564.5	77197.5	69932.9	97055.4	72278.5	73022.8	91453	137104	65513	91890.2	92374.5	75792.8	129197	71782	72939.7	99991.5	70677.3	99624.9	111965	88157.6	67436.8	109264	92466.5	91262.4
LacCer d43:4_33.32	LacCer d43:4	33.32	C55 H99 N O13	-4.99	981.707	980.699	[M-H]-1	366799	597510	677760	617709	486772	439726	542048	392934	550607	432235	357608	549520	672309	696877	416542	426632	611447	428844	568383	594504	566867	529341	496653	339655	484272	501633	568259	537497	664587	437933	519311	434936	631544	621464	433721	543448	437081	499525	708731	556940	755614	646430
LacCer d43:4_4.39	LacCer d43:4	4.39	C55 H99 N O13	-2.82	981.709	982.716	[M+H]+1	3.75399e+07	4.51224e+07	6.73711e+07	5.35859e+07	6.08524e+07	5.68938e+07	4.98107e+07	5.71452e+07	6.95684e+07	4.15037e+07	7.05691e+07	5.56351e+07	4.70286e+07	5.79663e+07	4.97294e+07	7.02469e+07	5.36434e+07	4.70385e+07	724582	1.51258e+06	725494	5.67492e+07	479683	786207	571285	4.4869e+07	5.5965e+07	6.78314e+07	8.56722e+07	6.31635e+07	7.21079e+07	4.28072e+07	7.17919e+07	783521	574038	589881	567848	538324	4.18447e+07	6.15651e+07	5.54648e+07	6.36315e+07
LacCer d43:4_32.47	LacCer d43:4	32.47	C55 H99 N O13	-2.16	981.71	982.717	[M+H]+1	160837	175154	282864	217174	252584	214049	175576	130048	205851	280282	273018	175718	150080	139254	166174	252259	149831	173031	141640	268798	140914	163031	125665	154043	225764	215024	143922	345085	260649	127447	264933	138354	165224	182525	140764	147268	166346	172098	162869	318456	159419	199907
LacCer d43:6_4.53	LacCer d43:6	4.53	C55 H95 N O13	7.62	977.688	978.695	[M+H]+1	4.09277e+06	3.98288e+06	4.80284e+06	3.8636e+06	4.0422e+06	3.87258e+06	2.23491e+06	3.12368e+06	3.49228e+06	3.32942e+06	2.72965e+06	4.42128e+06	4.80571e+06	3.45173e+06	3.22314e+06	4.22733e+06	1.68577e+06	2.38823e+06	965515	2.01553e+06	966730	3.5788e+06	639185	1.04763e+06	761246	1.89805e+06	3.00476e+06	3.60682e+06	2.70638e+06	5.94476e+06	4.58771e+06	2.01661e+06	3.12306e+06	1.04405e+06	764914	786024	756665	717324	2.95784e+06	3.92494e+06	2.70844e+06	3.95054e+06
LacCer d44:2_28.93	LacCer d44:2	28.93	C56 H105 N O13	0.13	999.759	1000.77	[M+H]+1	532630	518405	1.10297e+06	767915	603950	504855	1.13651e+06	486599	854685	909204	711007	484410	647122	384810	555239	722281	815504	552110	454763	629191	454406	873410	390433	444305	461883	1.05933e+06	368639	978796	898687	391448	715823	307625	356842	436972	548463	880630	757115	540370	440045	740033	644643	650374
LacCer d44:4_5.37	LacCer d44:4	5.37	C56 H101 N O13	-2.18	995.725	996.732	[M+H]+1	2.14525e+07	2.31814e+07	2.71877e+07	2.78377e+07	2.03203e+07	2.71586e+07	2.05582e+07	2.11885e+07	3.357e+07	3.30742e+07	3.11305e+07	2.46461e+07	2.72506e+07	3.26494e+07	2.11441e+07	2.84898e+07	3.2912e+07	2.18265e+07	383223	663484	354254	3.09356e+07	424374	382919	437225	2.1834e+07	2.4746e+07	2.65643e+07	2.81184e+07	3.17274e+07	2.77887e+07	1.88003e+07	3.05066e+07	476573	720215	453738	435566	421471	2.18846e+07	1.75712e+07	2.64646e+07	2.50661e+07
LacCer d44:6_29.64	LacCer d44:6	29.64	C56 H97 N O13	-1.6	991.694	992.702	[M+H]+1	4.72858e+06	1.09881e+06	1.53177e+06	2.13155e+06	8.32582e+06	5.14727e+06	1.1674e+06	2.55895e+06	2.93421e+06	2.55093e+06	5.34032e+06	730809	990815	2.86684e+06	1.43315e+06	5.70651e+06	2.01449e+06	1.61114e+06	801177	6.08833e+06	3.98832e+06	1.79009e+06	688394	4.95059e+06	3.06427e+06	3.64824e+06	4.27367e+06	1.33836e+07	5.43677e+06	1.37331e+06	6.67135e+06	1.72608e+06	1.81429e+06	5.05882e+06	2.66103e+06	2.74898e+06	2.94602e+06	5.53604e+06	1.46758e+06	2.93511e+06	1.2269e+06	2.2418e+06
LacCer d44:6_11.76	LacCer d44:6	11.76	C56 H97 N O13	7.12	991.703	992.71	[M+H]+1	126559	179231	126460	80197.6	172731	155472	119190	133033	142284	151326	166090	128776	174431	182857	126661	136798	145165	122930	105013	81367.9	112690	146419	100684	96146.1	118391	123959	154089	142366	143305	155654	177037	124438	134095	105894	97583.5	96693.9	111411	89467	146097	159635	143920	146916
LacCer d45:1_34.94	LacCer d45:1	34.94	C57 H109 N O13	-1.76	1015.79	1014.78	[M-H]-1	665668	620983	1.02719e+06	717840	376335	423798	528846	506667	716364	441372	744163	536146	650299	652709	589756	533437	852161	824067	656834	821050	682232	643342	679323	576134	477400	649101	566799	604257	709872	769676	515188	695957	583889	682252	779708	688632	845992	546038	939355	608522	598666	624988
LacCer d45:3_5.35	LacCer d45:3	5.35	C57 H105 N O13	-9.76	1011.75	506.882	[M+2H]+2	3.7632e+07	5.46236e+07	6.4677e+07	5.12094e+07	4.70437e+07	5.2412e+07	4.79409e+07	5.41117e+07	7.81377e+07	4.51166e+07	6.24118e+07	3.63326e+07	3.82519e+07	4.58922e+07	6.23164e+07	5.97098e+07	4.16318e+07	4.75608e+07	247272	469628	230279	5.91556e+07	224235	253731	246709	3.74294e+07	4.82346e+07	6.06764e+07	7.18002e+07	6.10743e+07	5.76258e+07	4.91838e+07	5.64519e+07	214398	195531	204547	200222	198457	4.56044e+07	4.77253e+07	6.27579e+07	7.25699e+07
LacCer d45:3_36.29	LacCer d45:3	36.29	C57 H105 N O13	6.83	1011.77	1012.77	[M+H]+1	1.0102e+06	612771	1.11192e+06	968930	1.29779e+06	801723	1.12226e+06	633976	949138	765034	1.52447e+06	769291	446182	626794	520338	923309	718318	864226	425770	1.00405e+06	364600	696430	390885	574707	648484	818818	374291	1.05648e+06	1.36152e+06	567466	1.04808e+06	397761	868397	1.801e+06	388746	987579	1.04194e+06	925878	320624	1.11841e+06	430745	594764
LacCer d45:3_33.81	LacCer d45:3	33.81	C57 H105 N O13	7.91	1011.77	1010.76	[M-H]-1	187749	141068	204984	104654	242140	217156	115006	181626	394547	145649	282319	181672	192875	199029	168576	295181	182553	299313	340702	258438	146831	159166	148634	304347	179261	213329	145011	455544	273041	185455	217781	163078	181638	240747	201326	178557	225553	228663	190057	125339	175124	174979
LacCer d45:5_33.8	LacCer d45:5	33.8	C57 H101 N O13	6.83	1007.73	1008.74	[M+H]+1	190342	193642	318438	242192	136706	149135	205252	160096	211449	221790	187866	207224	225630	192327	154055	179826	210893	209016	191957	189963	194426	315827	176159	211529	280453	304772	166177	258199	281296	199253	431351	183844	196697	203528	177806	239358	255974	297219	189531	231079	214189	464347
LacCer d45:5_12.58	LacCer d45:5	12.58	C57 H101 N O13	7.14	1007.73	1008.74	[M+H]+1	365532	502824	349333	529243	642660	745508	515847	290345	1.17197e+06	791590	185566	389785	232132	299921	772778	645901	468958	230714	645803	522710	297057	1.94199e+06	589046	1.38408e+06	819352	409431	507112	1.7339e+06	2.19877e+06	1.23276e+06	428309	487983	398939	465612	365200	275912	563240	488562	1.12524e+06	912401	203720	944380
LacCer d46:1_36.57	LacCer d46:1	36.57	C58 H111 N O13	-0.08	1029.81	1030.81	[M+H]+1	503807	1.49185e+06	911845	1.06495e+06	236670	578486	1.69731e+06	1.51691e+06	942875	505314	436051	984797	975977	578419	1.0939e+06	484368	1.86584e+06	1.27595e+06	805378	389444	689334	1.29321e+06	717180	944909	1.19442e+06	1.83992e+06	786790	1.35327e+06	547665	457410	1.19499e+06	394933	633410	936816	408272	693445	1.14434e+06	914246	481889	1.58735e+06	971931	1.08334e+06
LacCer d46:3_6.49	LacCer d46:3	6.49	C58 H107 N O13	-9.2	1025.76	513.89	[M+2H]+2	1.13554e+07	1.26466e+07	1.74707e+07	1.57445e+07	1.76834e+07	1.72408e+07	9.54998e+06	1.62674e+07	1.77664e+07	1.68157e+07	1.91891e+07	1.36151e+07	1.156e+07	1.69024e+07	1.51827e+07	1.77872e+07	1.40888e+07	1.06863e+07	555766	533675	596000	1.5175e+07	614767	2.30509e+06	475050	1.25935e+07	1.29005e+07	1.69463e+07	2.23375e+07	1.91274e+07	1.83136e+07	1.18552e+07	1.58523e+07	647187	612695	493664	465456	493055	1.52633e+07	1.63524e+07	1.21629e+07	1.9372e+07
LacCer d47:2_31.38	LacCer d47:2	31.38	C59 H111 N O13	1.45	1041.81	1042.81	[M+H]+1	390265	525361	701581	614879	1.75858e+06	1.07925e+06	594403	461370	787715	1.12537e+06	1.52633e+06	439746	370701	556393	534006	1.08506e+06	515603	570476	366514	997554	481186	396520	352281	479143	822974	783393	629077	1.68333e+06	1.40887e+06	340444	1.32652e+06	329951	540063	756988	504297	433153	447835	736349	529968	1.26905e+06	491547	522895
LacCer d47:3_7.79	LacCer d47:3	7.79	C59 H109 N O13	-8.45	1039.78	520.898	[M+2H]+2	2.20958e+06	2.47574e+06	4.70235e+06	4.44246e+06	1.87492e+06	2.36474e+06	2.33544e+06	2.94856e+06	3.81785e+06	2.77305e+06	3.04614e+06	2.15123e+06	2.45448e+06	2.42334e+06	2.10278e+06	3.07838e+06	2.03831e+06	2.34715e+06	216327	233246	195637	2.98088e+06	217917	160639	205352	1.29596e+06	2.1769e+06	3.12687e+06	3.24296e+06	3.61278e+06	2.89746e+06	1.51926e+06	2.93385e+06	172178	154593	182249	180786	220536	2.66996e+06	2.18309e+06	3.13767e+06	2.72365e+06
LacCer d47:3_37.62	LacCer d47:3	37.62	C59 H109 N O13	6.28	1039.8	1040.8	[M+H]+1	943682	1.92722e+06	2.11592e+06	2.36006e+06	344747	1.05601e+06	2.0928e+06	2.12048e+06	2.24131e+06	1.64501e+06	803755	1.46175e+06	1.74435e+06	972608	3.1412e+06	1.74941e+06	2.7139e+06	2.27495e+06	1.64083e+06	1.02849e+06	1.9326e+06	1.49239e+06	2.48929e+06	2.92155e+06	2.3171e+06	2.62387e+06	1.92054e+06	2.46366e+06	1.79274e+06	1.10847e+06	1.8557e+06	1.59705e+06	1.8293e+06	1.80816e+06	1.12938e+06	1.5843e+06	1.70465e+06	1.74291e+06	1.16748e+06	3.05504e+06	1.79473e+06	1.93265e+06
LacCer d48:3_15.55	LacCer d48:3	15.55	C60 H111 N O13	-8.83	1053.8	527.905	[M+2H]+2	804345	1.45069e+06	426891	866311	1.44553e+06	1.46909e+06	1.11067e+06	431161	2.31324e+06	1.28405e+06	478849	859816	601877	518522	1.39437e+06	1.40392e+06	981828	546035	651264	820107	550176	1.70593e+06	659443	1.63641e+06	1.86224e+06	481558	1.06219e+06	3.25078e+06	3.65777e+06	2.17183e+06	921731	1.25246e+06	696574	615318	942223	197941	653528	936256	1.55719e+06	2.27745e+06	583008	997021
LacCer d50:2_28.96	LacCer d50:2	28.96	C62 H117 N O13	1.78	1083.85	1084.86	[M+H]+1	646103	928760	1.82966e+06	1.19759e+06	796110	617321	1.58455e+06	651459	1.30313e+06	1.10291e+06	975438	668208	1.01814e+06	602599	690830	995576	989242	713416	686512	898542	614965	1.08858e+06	593759	562298	868813	1.61993e+06	556605	1.18732e+06	1.09015e+06	593128	1.05244e+06	381760	470807	659596	1.71038e+06	1.13465e+06	918414	778510	547968	1.30271e+06	810211	915789
LacCer t31:1_12.91	LacCer t31:1	12.91	C43 H81 N O14	-8.02	835.559	836.566	[M+H]+1	123035	178124	163365	132979	247067	296479	153121	203928	172275	191919	228038	166914	166271	168103	182644	161840	359650	131818	136057	125818	164572	156311	239003	195584	116787	135994	128720	139516	216716	178328	142635	116619	161306	158624	126015	114077	131115	130008	221753	105817	277843	174808
LacCer t31:4_30.04	LacCer t31:4	30.04	C43 H75 N O14	3.65	829.522	828.518	[M-H]-1	206497	187201	229782	281654	270429	184955	206284	186202	275019	198998	211730	231630	245292	219271	295071	190803	268104	266016	222719	265391	213220	241984	264346	174752	298315	356943	206133	239144	263569	192845	217482	244768	242211	195050	193395	230372	217128	270025	248321	290930	261286	216582
LacCer t32:0_33.25	LacCer t32:0	33.25	C44 H85 N O14	8.45	851.604	850.597	[M-H]-1	244604	437698	458898	470625	387523	321108	395293	327248	417530	351961	217001	396721	353469	513690	272270	290290	370994	278302	351724	449564	402912	370475	358412	237415	394284	460957	377990	321023	538075	323826	498553	342719	396796	409265	303734	313178	317445	329655	494675	436473	535171	409493
LacCer t32:4_27.18	LacCer t32:4	27.18	C44 H77 N O14	-2.69	843.532	844.538	[M+H]+1	251274	457139	656086	663294	621079	352379	370165	289302	705714	796190	743671	300713	333986	453362	553012	586853	510983	530068	320278	641382	317292	369671	309439	309856	312160	681427	297778	1.12471e+06	517767	313247	605659	359508	314612	432602	333566	347566	353047	368510	249155	607781	396466	375601
LacCer t32:5_25.5	LacCer t32:5	25.5	C44 H75 N O14	-5.54	841.514	842.521	[M+H]+1	1.26452e+07	8.92156e+06	8.84601e+06	1.68861e+07	1.45221e+07	1.07243e+07	8.60767e+06	1.072e+07	1.26451e+07	1.2819e+07	1.14491e+07	1.28872e+07	1.43538e+07	1.20192e+07	1.42448e+07	1.05811e+07	1.24695e+07	8.96943e+06	1.34373e+07	1.14539e+07	1.51958e+07	1.69641e+07	1.70276e+07	1.39242e+07	1.7457e+07	1.18406e+07	1.78849e+07	1.40578e+07	9.45333e+06	1.35292e+07	1.09871e+07	1.56003e+07	1.42091e+07	1.69634e+07	1.70206e+07	9.16639e+06	1.10861e+07	8.56459e+06	1.17127e+07	1.14635e+07	1.18366e+07	8.79703e+06
LacCer t33:0_30.35	LacCer t33:0	30.35	C45 H87 N O14	-3.85	865.609	864.602	[M-H]-1	91544.3	82289.6	107703	118242	117436	127213	99889.5	90317.5	149892	154682	149841	93030.8	101900	128586	89303.6	106090	138876	89954.7	89936.1	157953	104663	91873.7	100528	88028.5	158108	112691	90385.1	138739	173615	83020.6	146015	93900.4	114888	118351	91763.8	111582	103707	129060	108718	129002	130274	97728.9
LacCer t33:1_27.7	LacCer t33:1	27.7	C45 H85 N O14	6.63	863.603	862.595	[M-H]-1	9.73589e+06	9.3938e+06	9.48566e+06	9.2569e+06	9.47368e+06	1.03474e+07	9.16934e+06	9.53014e+06	9.70694e+06	9.50299e+06	9.42556e+06	9.41589e+06	9.44328e+06	1.03927e+07	9.415e+06	9.44126e+06	9.86281e+06	9.35572e+06	9.44937e+06	9.62195e+06	9.28748e+06	9.74013e+06	9.60307e+06	9.495e+06	9.4715e+06	9.05603e+06	9.57058e+06	9.84756e+06	9.26082e+06	1.01691e+07	9.18236e+06	9.22881e+06	9.92991e+06	9.69235e+06	9.68135e+06	9.20468e+06	9.39101e+06	9.4506e+06	9.64686e+06	9.66276e+06	9.48699e+06	9.27761e+06
LacCer t33:2_24.02	LacCer t33:2	24.02	C45 H83 N O14	7.74	861.588	860.581	[M-H]-1	281123	254729	311219	493925	644387	359330	294611	284196	762629	546697	666074	300591	327981	297127	297991	612892	328969	386398	219076	397217	308814	250258	217333	288940	319573	301779	236544	1.34259e+06	258520	281321	335028	443546	259875	244086	274153	253130	243086	263836	252442	904594	257208	234206
LacCer t33:4_27.24	LacCer t33:4	27.24	C45 H79 N O14	-5.41	857.545	856.538	[M-H]-1	1.11762e+07	2.16881e+07	1.51871e+07	2.79927e+07	2.65386e+07	1.12548e+07	1.20199e+07	1.06539e+07	2.039e+07	2.20138e+07	1.48969e+07	7.34868e+06	9.04517e+06	8.70305e+06	1.27722e+07	1.26003e+07	1.46645e+07	1.83145e+07	1.25232e+07	1.26765e+07	1.1453e+07	6.18312e+06	1.178e+07	5.18433e+06	1.27277e+07	2.04249e+07	1.00323e+07	1.60716e+07	8.87861e+06	1.56637e+07	1.46977e+07	1.70089e+07	9.40609e+06	1.99839e+07	1.37298e+07	1.11121e+07	1.13021e+07	8.98616e+06	9.22891e+06	1.96908e+07	8.15906e+06	9.32033e+06
LacCer t34:1_22.78	LacCer t34:1	22.78	C46 H87 N O14	0.38	877.613	860.609	[M+H-H2O]+1	6.31509e+06	4.35785e+06	5.58368e+06	2.8496e+06	1.41824e+07	7.73713e+06	3.84922e+06	4.7457e+06	1.17458e+07	1.21486e+07	1.30412e+07	2.26143e+06	2.68023e+06	6.07453e+06	3.74084e+06	1.00085e+07	6.03657e+06	5.12509e+06	3.50569e+06	1.23287e+07	8.64208e+06	4.38422e+06	3.80532e+06	5.63518e+06	4.9721e+06	9.31701e+06	9.55038e+06	2.45512e+07	9.90521e+06	3.6125e+06	1.8134e+07	2.05704e+06	2.4957e+06	6.98433e+06	3.86578e+06	4.47807e+06	6.36322e+06	5.85222e+06	6.24054e+06	8.64826e+06	3.18619e+06	5.15474e+06
LacCer t34:3_30.85	LacCer t34:3	30.85	C46 H83 N O14	6.96	873.587	872.58	[M-H]-1	147559	155153	165252	179161	144494	179439	163006	128488	211231	263951	195479	125913	122182	147754	140535	155610	144090	121769	130758	222631	131864	251673	135298	129628	212655	164162	258026	199184	277908	126445	186000	121384	267566	161211	150393	125016	122629	144618	137333	206978	137138	186347
LacCer t35:1_28.01	LacCer t35:1	28.01	C47 H89 N O14	9.22	891.637	890.629	[M-H]-1	993224	711039	831577	1.31526e+06	1.13563e+06	1.81297e+06	1.02295e+06	732898	1.90114e+06	1.52943e+06	1.41237e+06	1.21262e+06	911511	1.32508e+06	773673	1.03407e+06	1.5043e+06	1.09983e+06	943632	1.83222e+06	1.07478e+06	1.16486e+06	1.36983e+06	819436	1.25134e+06	768789	881353	2.19187e+06	1.01988e+06	716418	1.06917e+06	1.22514e+06	827445	763830	799506	1.09436e+06	1.31683e+06	1.49017e+06	1.29586e+06	1.50585e+06	1.21184e+06	1.21006e+06
LacCer t35:2_31.46	LacCer t35:2	31.46	C47 H87 N O14	-4.8	889.608	890.616	[M+H]+1	489145	647768	759877	792265	1.85979e+06	1.39785e+06	1.35584e+06	599565	1.09404e+06	1.19791e+06	3.16909e+06	436280	484580	1.40153e+06	754273	1.45995e+06	697166	1.0702e+06	387608	2.91422e+06	508879	821127	390081	589058	870338	828479	1.13742e+06	1.81547e+06	1.44877e+06	381941	1.6162e+06	945545	664503	800555	496112	613078	985159	875028	749148	1.50404e+06	640581	1.0048e+06
LacCer t35:2_30.04	LacCer t35:2	30.04	C47 H87 N O14	4.24	889.616	888.609	[M-H]-1	137128	142847	147850	202076	158459	130851	140303	142084	194939	131006	139389	159131	133700	167318	138205	125843	172603	149965	155465	197392	154846	161538	188253	129662	177112	168332	133805	137630	196845	135547	159061	160898	173485	148836	132857	172128	165683	177809	189485	173020	176486	147925
LacCer t35:2_26.94	LacCer t35:2	26.94	C47 H87 N O14	8.33	889.62	888.613	[M-H]-1	420011	239959	476908	459696	466310	575708	306373	308383	883845	657761	631252	335572	325222	447534	351121	443927	577029	316542	284628	777078	402029	501118	348601	278490	580424	314172	337684	657350	374795	251567	604086	300578	398403	267611	288978	495480	470585	691961	462758	774614	403682	393455
LacCer t35:2_26.52	LacCer t35:2	26.52	C47 H87 N O14	9.64	889.621	888.614	[M-H]-1	374916	197044	352815	379053	617443	545959	259689	208700	667466	696867	806761	291228	204851	473050	354391	463188	403032	277690	279799	851521	370885	308926	331013	224330	380465	249139	300399	828713	343864	211490	499300	313108	262112	299359	231802	372907	431446	623606	372126	567358	373807	326969
LacCer t35:3_31.61	LacCer t35:3	31.61	C47 H85 N O14	7.85	887.604	888.61	[M+H]+1	3.92913e+06	2.33802e+06	4.70768e+06	4.57423e+06	6.75071e+06	5.61308e+06	1.99617e+06	1.98181e+06	7.19039e+06	6.6551e+06	8.94767e+06	1.25786e+06	1.92891e+06	2.57396e+06	3.43579e+06	4.5687e+06	5.16908e+06	6.89012e+06	4.1472e+06	7.27398e+06	3.79548e+06	4.00569e+06	1.7384e+06	3.9996e+06	4.48393e+06	2.02922e+06	3.11913e+06	6.58834e+06	4.15747e+06	2.30152e+06	5.4307e+06	1.8385e+06	1.85487e+06	3.60342e+06	4.96059e+06	4.42634e+06	5.63661e+06	3.58948e+06	4.87552e+06	7.62719e+06	2.50384e+06	3.60799e+06
LacCer t35:3_20.14	LacCer t35:3	20.14	C47 H85 N O14	8.83	887.605	888.612	[M+H]+1	51161.6	44567.3	46860.5	58443.5	53207.2	48650.9	52456.3	62872.8	34976.2	45631	45978.4	48774.7	50219.3	190765	50040.3	50764.4	49150.3	48854.1	59626.7	55569.8	62009	68570.6	59837.3	70394.6	81308.3	61188.2	65792.9	90090.2	47466.7	68168	50279.4	60372.9	45064	234863	57459.5	133339	84334.6	68784.2	36219.3	51077.1	58797.1	47308.3
LacCer t36:2_19.38	LacCer t36:2	19.38	C48 H89 N O14	-0.99	903.627	452.821	[M+2H]+2	78635.8	63946.6	426730	64113.6	84282.4	54506.5	63921.1	64614.5	59910.5	75626.6	84812.9	53048.6	64898.8	551497	66209.6	83874	71588.6	61930.7	92807.1	92722.9	76642.7	58761.1	76003.5	100050	88447.3	65542.6	52277	427383	85951.8	71060.5	78087.2	86331.2	72958.9	465012	117660	108514	103041	89446.5	99400.4	72349.1	54689.6	50530.5
LacCer t36:4_30.76	LacCer t36:4	30.76	C48 H85 N O14	7.41	899.604	900.611	[M+H]+1	501867	922119	1.59151e+06	1.73268e+06	1.42195e+06	969725	1.13658e+06	589411	1.5624e+06	1.0187e+06	959153	712708	711370	549410	1.19366e+06	887765	1.71595e+06	1.10418e+06	785291	948327	522055	1.03357e+06	676625	1.01264e+06	849747	1.72192e+06	449145	2.54611e+06	995236	741805	1.10284e+06	577260	844814	611894	695041	1.08905e+06	927157	784422	602092	1.26529e+06	775157	1.14558e+06
LacCer t37:1_30.5	LacCer t37:1	30.5	C49 H93 N O14	8.66	919.668	918.66	[M-H]-1	2.01883e+06	493574	1.78806e+06	1.26989e+06	2.74279e+06	1.36308e+06	617956	651158	1.16417e+06	1.98882e+06	4.18072e+06	756988	230945	1.40006e+06	2.13302e+06	3.26394e+06	625973	699417	665169	1.46626e+06	1.50757e+06	613555	724769	2.49457e+06	909092	2.95934e+06	1.40337e+06	4.77159e+06	1.14024e+06	528104	3.16254e+06	1.02846e+06	293318	1.93467e+06	968978	1.14434e+06	1.12863e+06	1.21258e+06	909618	1.46255e+06	557348	1.0346e+06
LacCer t37:2_31.56	LacCer t37:2	31.56	C49 H91 N O14	-1.89	917.642	916.636	[M-H]-1	8.44677e+06	1.07148e+07	1.7821e+07	1.35191e+07	3.00261e+07	1.96778e+07	1.3111e+07	1.0083e+07	1.77939e+07	2.01162e+07	2.71579e+07	7.232e+06	8.17228e+06	1.28254e+07	1.22649e+07	2.28902e+07	1.29483e+07	1.11693e+07	7.78742e+06	1.47581e+07	1.06938e+07	8.81915e+06	7.89492e+06	8.40202e+06	1.38101e+07	1.17256e+07	9.11602e+06	2.57225e+07	1.95333e+07	8.44773e+06	2.09024e+07	6.49921e+06	1.02836e+07	1.67006e+07	7.41286e+06	1.26898e+07	1.03972e+07	1.5873e+07	1.30723e+07	2.01878e+07	1.03306e+07	8.66749e+06
LacCer t37:2_31.63	LacCer t37:2	31.63	C49 H91 N O14	-0.21	917.644	916.636	[M-H]-1	8.44661e+06	7.36252e+06	5.69173e+06	5.50745e+06	1.63462e+07	5.90661e+06	6.9829e+06	4.76656e+06	9.83708e+06	1.15504e+07	1.739e+07	2.12443e+06	6.32212e+06	1.27828e+07	7.81777e+06	2.28902e+07	8.3301e+06	1.10492e+07	7.57642e+06	1.44865e+07	6.67596e+06	5.23556e+06	4.89936e+06	8.40202e+06	5.34566e+06	4.22186e+06	9.11602e+06	2.10646e+07	6.1509e+06	5.8695e+06	5.56015e+06	2.4304e+06	3.05937e+06	1.74592e+07	1.6829e+06	1.26898e+07	1.03294e+07	7.9477e+06	8.68266e+06	1.29248e+07	4.44102e+06	1.99319e+06
LacCer t37:2_33.72	LacCer t37:2	33.72	C49 H91 N O14	2.27	917.646	918.653	[M+H]+1	930766	916654	2.13543e+06	1.15247e+06	650969	789926	979496	880808	1.26871e+06	1.02386e+06	1.39968e+06	876959	1.72061e+06	1.12684e+06	994013	996415	1.13614e+06	1.58588e+06	984442	1.52891e+06	1.58679e+06	1.12415e+06	1.29491e+06	1.31504e+06	1.96214e+06	1.32657e+06	811069	1.35327e+06	1.67906e+06	1.47069e+06	1.24703e+06	985573	1.1538e+06	1.13058e+06	933755	1.60102e+06	1.14312e+06	1.21944e+06	972313	1.24755e+06	1.14345e+06	1.66187e+06
LacCer t37:3_33.46	LacCer t37:3	33.46	C49 H89 N O14	8.1	915.636	916.642	[M+H]+1	2.65489e+06	1.5789e+06	3.31992e+06	2.62731e+06	6.45714e+06	4.9206e+06	2.06526e+06	2.42335e+06	5.42511e+06	5.35004e+06	6.91811e+06	1.24801e+06	1.92591e+06	1.96933e+06	1.823e+06	6.75007e+06	1.99992e+06	4.75108e+06	1.93029e+06	5.96193e+06	1.48897e+06	2.04634e+06	1.17824e+06	2.41999e+06	2.53537e+06	1.99866e+06	1.93146e+06	3.51589e+06	2.128e+06	1.84998e+06	1.61114e+06	2.7815e+06	1.49383e+06	1.3938e+06	3.55945e+06	2.42166e+06	5.67693e+06	4.55747e+06	2.0069e+06	4.94922e+06	1.63144e+06	1.30099e+06
LacCer t37:4_31.41	LacCer t37:4	31.41	C49 H87 N O14	8.69	913.621	914.626	[M+H]+1	2.18681e+06	1.49761e+06	4.51974e+06	5.52894e+06	1.10686e+07	7.30977e+06	2.79626e+06	5.88505e+06	8.46937e+06	1.24211e+07	7.04133e+06	5.22555e+06	3.55961e+06	6.84173e+06	6.02552e+06	8.42844e+06	4.9197e+06	3.17278e+06	2.69826e+06	5.30973e+06	3.92251e+06	3.33274e+06	3.75023e+06	2.9918e+06	7.97694e+06	6.63503e+06	6.13102e+06	6.27791e+06	7.91445e+06	3.04541e+06	1.09622e+07	3.47487e+06	6.11081e+06	5.86429e+06	4.38299e+06	4.2834e+06	6.20447e+06	7.01475e+06	5.85842e+06	8.11032e+06	4.69663e+06	4.01332e+06
LacCer t37:4_22.31	LacCer t37:4	22.31	C49 H87 N O14	9.09	913.621	914.628	[M+H]+1	92232.6	106079	460700	119078	230302	113321	115448	121781	133398	164033	220837	101928	132142	166629	123023	118106	106872	105306	262515	145289	101511	105552	108923	121203	123357	117959	99255.3	1.02919e+06	110218	88984.6	124963	91465	111901	896977	110106	103705	111657	115492	154820	149334	114571	125074
LacCer t37:5_28.86	LacCer t37:5	28.86	C49 H85 N O14	-5.7	911.592	910.585	[M-H]-1	212039	144726	226003	222165	224777	256294	201012	165102	321084	209211	283551	173599	173381	258179	169300	200334	261362	142743	185813	346652	335484	258088	206109	145328	210240	160222	166323	227380	252929	122560	198429	153971	188128	178110	146086	289267	287378	303824	269187	275079	253653	211876
LacCer t37:5_29.73	LacCer t37:5	29.73	C49 H85 N O14	-5.23	911.592	910.585	[M-H]-1	447951	224274	689019	1.21857e+06	450620	708669	526557	415171	649444	929273	580601	188175	359193	366864	624912	375922	472118	872773	189796	760290	312340	498331	300430	395844	503688	685542	259113	761458	412558	965478	368346	462248	314861	463286	286359	281237	564454	371226	324937	1.25616e+06	265464	258006
LacCer t37:5_29.59	LacCer t37:5	29.59	C49 H85 N O14	6.25	911.603	912.61	[M+H]+1	1.65629e+06	965899	1.36052e+06	2.20628e+06	2.81499e+06	1.96425e+06	1.44545e+06	2.39437e+06	1.80845e+06	2.7547e+06	2.35617e+06	780878	718780	1.97338e+06	2.20384e+06	3.2157e+06	1.19902e+06	1.38211e+06	706195	1.76974e+06	1.57032e+06	1.39445e+06	1.17743e+06	1.06823e+06	3.06864e+06	2.76781e+06	2.76667e+06	2.89416e+06	3.13206e+06	911346	4.82157e+06	929130	1.69642e+06	2.23909e+06	1.57817e+06	1.16062e+06	905837	1.87164e+06	1.37231e+06	2.03577e+06	984249	865852
LacCer t38:0_30.81	LacCer t38:0	30.81	C50 H97 N O14	6.12	935.697	934.692	[M-H]-1	127210	118641	129075	137026	192160	161619	120868	97130.3	156627	147430	209540	93363.8	90596.9	111745	176034	138245	125944	101616	87968.7	180358	97814	107428	107504	185537	130567	129981	145225	341574	150538	100756	159265	93566.7	125559	128036	111515	93518.5	95500.6	130393	101741	184962	101687	138175
LacCer t38:1_33.04	LacCer t38:1	33.04	C50 H95 N O14	-9.23	933.667	932.659	[M-H]-1	163352	184806	541380	166039	97798.9	165513	188992	171414	194518	178482	128886	137446	331214	284998	129954	136897	174427	150844	175140	223824	153701	166966	166088	250745	187094	293379	174597	463016	216127	218940	223092	172967	181044	137143	169760	188207	319094	587886	179201	168256	292814	197527
LacCer t38:1_34.01	LacCer t38:1	34.01	C50 H95 N O14	1.62	933.677	932.669	[M-H]-1	378723	225744	276888	188270	150444	190897	249379	270973	359869	202831	255969	226386	381284	337077	232295	242434	345010	262905	270844	366923	232705	313190	234239	256580	284855	321855	238656	372936	446291	351048	343924	261948	326461	166943	372369	322607	359047	371167	316128	242467	309825	268427
LacCer t38:3_30.75	LacCer t38:3	30.75	C50 H91 N O14	0.92	929.645	928.638	[M-H]-1	937562	640389	719643	465933	1.39926e+06	1.30517e+06	393648	458122	758293	2.23966e+06	1.74111e+06	353246	486452	353034	761874	1.24791e+06	777085	692317	322557	1.28969e+06	536492	349342	198951	822375	1.06988e+06	345218	357642	2.22762e+06	1.19703e+06	189589	954046	229036	472826	1.02906e+06	788563	409066	347518	1.24004e+06	295911	1.75938e+06	327042	339721
LacCer t38:5_34.52	LacCer t38:5	34.52	C50 H87 N O14	0.36	925.613	924.606	[M-H]-1	138052	127384	151136	104425	47788.5	79973.2	134472	87169.2	118069	117500	54978.2	82245.4	145356	96191.9	88806.8	126756	95323.6	110256	130494	114132	111788	96244.3	97568.1	119838	153929	91764.9	89477.1	154589	182793	107033	107074	104498	146442	103842	107956	116135	95333.2	102517	145651	123393	100267	139851
LacCer t39:0_30.88	LacCer t39:0	30.88	C51 H99 N O14	2.99	949.709	950.717	[M+H]+1	299461	756067	1.06212e+06	1.37402e+06	389382	257171	936283	358997	859765	781159	384741	556101	427503	446716	445061	386834	749855	786160	562750	587057	289001	733528	551180	320043	597965	1.03167e+06	363279	742029	645047	538153	710799	382399	517870	348892	452520	771708	658183	491834	415730	891907	542538	630598
LacCer t39:0_33.81	LacCer t39:0	33.81	C51 H99 N O14	9.54	949.716	948.708	[M-H]-1	316033	153807	460878	151719	322703	265973	222619	189871	235407	257162	781910	218307	210292	297332	364349	437700	224644	180811	196745	465071	160091	340515	164538	157407	253978	266546	186389	613169	297697	263700	2.4827e+06	177805	198041	227263	219506	194681	320775	278650	207220	342984	211238	1.03293e+06
LacCer t39:1_34.15	LacCer t39:1	34.15	C51 H97 N O14	1.57	947.692	946.685	[M-H]-1	102447	120260	158710	134007	58199.9	70185.6	133440	103222	144835	92658.8	64796.4	122248	146970	102973	88478.9	100922	131340	117316	144017	104983	102998	123606	99744.5	101564	114201	134776	92593.6	176377	176998	107246	122996	95033.4	153060	97578	102127	107866	118041	120605	135321	136474	118064	131399
LacCer t39:2_33.46	LacCer t39:2	33.46	C51 H95 N O14	-1.37	945.674	944.667	[M-H]-1	4.59648e+06	2.62667e+06	9.02213e+06	5.32069e+06	9.52111e+06	6.38156e+06	4.30776e+06	2.99354e+06	9.17035e+06	7.73872e+06	1.02411e+07	862343	1.57265e+06	3.75896e+06	3.67279e+06	1.03719e+07	4.0124e+06	8.1571e+06	2.73001e+06	1.3935e+07	2.8968e+06	4.8868e+06	1.23503e+06	5.13869e+06	5.11658e+06	4.68757e+06	3.26196e+06	1.25416e+07	5.66741e+06	3.23192e+06	4.89451e+06	2.01862e+06	2.35673e+06	4.30929e+06	5.56231e+06	4.50543e+06	7.99219e+06	7.23336e+06	1.9513e+06	7.87728e+06	1.76209e+06	2.06075e+06
LacCer t39:2_29.45	LacCer t39:2	29.45	C51 H95 N O14	2.66	945.678	946.683	[M+H]+1	787510	973320	1.16489e+06	1.68776e+06	1.78505e+06	1.0857e+06	931831	692959	2.24468e+06	2.1359e+06	1.63768e+06	629919	827408	776333	1.18375e+06	1.19882e+06	1.18871e+06	987166	616775	1.44153e+06	743742	592434	659665	842574	1.18112e+06	1.57234e+06	613567	1.98691e+06	1.25194e+06	670760	1.49124e+06	597245	738405	1.7396e+06	799732	880595	919821	933849	1.07852e+06	2.0394e+06	1.05758e+06	789797
LacCer t39:3_29.21	LacCer t39:3	29.21	C51 H93 N O14	6.55	943.666	942.659	[M-H]-1	74839	70647.8	90727.3	99712.9	82837.6	75158.2	80545.4	66740.7	119016	126693	114882	88549.1	89874.2	93708	62841.6	81800.3	112418	75213.9	66199.1	125199	71484	265909	81676.9	55245.9	95928.9	94283	65952.8	120489	109393	67065.1	98118.7	63277.3	82983.5	64902.8	62279.8	79602	82564.2	105652	103827	148581	102221	93171.3
LacCer t39:4_29.59	LacCer t39:4	29.59	C51 H91 N O14	0.83	941.645	940.637	[M-H]-1	2.51436e+06	1.79245e+06	2.11273e+06	1.49915e+06	1.03523e+07	5.02423e+06	1.77665e+06	2.91167e+06	1.87882e+06	4.38976e+06	5.32043e+06	2.06266e+06	1.46765e+06	2.4427e+06	3.99963e+06	4.69968e+06	1.82808e+06	984225	716867	3.62041e+06	1.73906e+06	1.22277e+06	1.67404e+06	697586	3.86406e+06	4.21242e+06	2.99614e+06	8.33484e+06	3.70946e+06	1.2232e+06	8.71895e+06	1.09688e+06	1.9437e+06	6.46898e+06	2.49617e+06	1.59993e+06	1.72356e+06	3.25407e+06	1.69619e+06	3.79694e+06	1.12507e+06	2.26215e+06
LacCer t40:2_32.73	LacCer t40:2	32.73	C52 H97 N O14	-1.18	959.69	958.683	[M-H]-1	149956	194519	156209	142504	64092	104953	134300	124945	175871	162008	81278.7	81291	254387	117878	114988	129211	152478	189046	150413	178354	195593	203155	117322	253531	152714	122262	90025.2	182212	172583	116547	170693	179773	202654	125380	138232	116322	124109	248520	158260	230665	148425	178331
LacCer t40:2_33.97	LacCer t40:2	33.97	C52 H97 N O14	-0.45	959.69	958.683	[M-H]-1	418772	249616	314233	217821	177410	211084	275751	299628	397925	237498	283037	255295	421605	375393	262013	294335	381494	290706	299485	405725	274238	346309	267381	283713	359267	355890	318306	412373	493485	397523	380294	289863	360984	189219	411746	356723	397016	430012	370471	268108	342589	308100
LacCer t40:2_29.25	LacCer t40:2	29.25	C52 H97 N O14	2.29	959.693	960.699	[M+H]+1	381692	972560	1.45271e+06	877855	489804	339078	1.36926e+06	742433	899309	906956	420999	946952	715088	820823	662584	742656	975166	771713	727405	749260	491839	1.19811e+06	732304	605201	723082	1.7371e+06	607473	877896	1.08018e+06	724671	949923	336704	399854	560237	567953	1.02137e+06	676785	654963	718053	1.39373e+06	900575	1.29351e+06
LacCer t40:3_30.72	LacCer t40:3	30.72	C52 H95 N O14	-0.26	957.675	956.668	[M-H]-1	144368	142214	154480	374937	150502	160504	129787	120369	292870	776565	189094	114370	179351	126731	124215	197208	142834	123856	108109	337920	122834	131294	121921	160637	367596	302115	160156	1.06553e+06	605141	114268	468895	106236	141938	156268	135110	116946	108308	434662	247620	301559	119803	140909
LacCer t40:3_31.99	LacCer t40:3	31.99	C52 H95 N O14	0.53	957.676	956.668	[M-H]-1	219987	153264	139501	143484	352485	141235	162946	240730	185032	802720	188885	252322	194830	316382	175940	192668	213964	119993	166622	287497	226676	210561	211724	171295	229841	180953	265657	221842	305827	239519	285032	202030	251476	140717	232718	216051	220958	286936	230402	172417	320085	233729
LacCer t41:0_42.21	LacCer t41:0	42.21	C53 H103 N O14	-7.8	977.73	978.738	[M+H]+1	4.0867e+06	6.00114e+06	5.47491e+06	1.81447e+06	775268	1.18395e+06	3.60329e+06	4.98893e+06	1.63909e+06	7.2817e+06	2.79395e+06	8.85891e+06	3.74647e+06	6.02884e+06	4.7786e+06	3.31099e+06	2.87573e+06	3.31043e+06	6.76296e+06	3.45603e+06	3.16068e+06	6.23071e+06	2.7586e+06	2.87802e+06	5.67837e+06	3.55045e+06	4.52198e+06	7.34719e+06	2.14011e+06	4.38799e+06	4.85272e+06	4.17114e+06	1.65491e+06	1.62386e+06	1.26742e+06	2.62754e+06	7.1506e+06	9.48832e+06	6.10981e+06	4.97889e+06	9.27091e+06	6.71416e+06
LacCer t41:0_33.82	LacCer t41:0	33.82	C53 H103 N O14	5.8	977.744	976.736	[M-H]-1	156708	117745	145570	115399	86468.1	93880.8	95991.8	123163	147762	121568	117480	167122	160986	166123	119461	117980	152371	138417	150615	136624	122555	159051	124060	120501	149623	178059	121036	150024	227898	154793	176275	136116	151607	85992.3	168040	149035	188262	189295	158634	104616	161710	146049
LacCer t41:1_32.61	LacCer t41:1	32.61	C53 H101 N O14	7.67	975.73	974.722	[M-H]-1	117541	156086	125556	126966	109004	143560	102728	129885	142401	164102	116701	74935.6	123651	106462	101598	151468	105096	98941.1	127877	195880	103437	112717	92736.7	121041	148204	98959.9	94126.1	168225	121762	88498.6	111947	98390.5	153416	87000.9	108711	120426	92180.2	138623	123118	199068	125119	135692
LacCer t41:1_33.59	LacCer t41:1	33.59	C53 H101 N O14	9.23	975.731	974.724	[M-H]-1	565512	570306	765407	615286	342949	378315	557618	427083	553564	432748	474081	419026	610100	469624	403089	404831	509593	793136	661333	715886	452372	481083	445092	515617	379466	368689	447262	663586	573124	519669	791885	486683	396986	465524	534066	428199	582116	428044	866632	532371	526125	690879
LacCer t41:2_29.96	LacCer t41:2	29.96	C53 H99 N O14	-0.04	973.707	974.714	[M+H]+1	645440	533835	686293	841449	561876	512185	617605	602993	630426	636835	687838	749426	766777	583640	561634	644086	517369	638390	710842	776402	771615	740932	715517	839025	924433	679551	574763	713598	737856	627919	820967	652278	711527	799011	741238	849635	909302	782354	619637	744575	748304	629613
LacCer t41:2_27.62	LacCer t41:2	27.62	C53 H99 N O14	8.69	973.715	974.722	[M+H]+1	3.85483e+06	3.83143e+06	3.33652e+06	3.40611e+06	3.72673e+06	4.384e+06	3.94903e+06	3.76548e+06	3.93454e+06	4.17075e+06	4.14219e+06	3.52658e+06	4.21489e+06	3.79346e+06	3.83975e+06	3.91506e+06	3.72296e+06	3.31175e+06	3.56792e+06	3.7215e+06	3.52885e+06	3.86234e+06	4.04531e+06	3.73892e+06	3.5343e+06	3.53737e+06	3.56827e+06	3.8938e+06	4.00103e+06	3.53493e+06	3.24908e+06	3.54168e+06	4.44831e+06	3.60702e+06	3.68452e+06	3.3514e+06	3.68489e+06	4.75002e+06	3.90901e+06	3.76152e+06	3.99989e+06	3.75452e+06
LacCer t41:4_28.57	LacCer t41:4	28.57	C53 H95 N O14	-3.54	969.672	968.665	[M-H]-1	137599	118501	152624	231355	215008	210411	134813	125617	297771	251638	295705	286601	109183	221283	153627	213743	242415	129698	132359	311010	151723	142389	186502	105886	225676	128693	147791	268431	165480	150944	260323	282125	151256	158093	111370	169116	186866	236564	175744	234775	177702	180254
LacCer t41:5_32.47	LacCer t41:5	32.47	C53 H93 N O14	2.95	967.662	968.67	[M+H]+1	197345	186677	301473	231461	239306	228131	187127	138603	219393	298721	290016	187278	159954	148416	177107	268855	159688	184414	150959	286481	157140	173757	133933	164177	240616	229170	153391	367788	277796	135832	282362	147456	176094	194533	150024	156957	177289	224525	173583	339406	169907	213058
LacCer t41:5_2.1	LacCer t41:5	2.1	C53 H93 N O14	5.78	967.665	968.672	[M+H]+1	3.24069e+06	2.85986e+06	4.43646e+06	1.28947e+06	7.1924e+06	2.10482e+06	3.16998e+06	1.39165e+06	4.90359e+06	3.2344e+06	6.01814e+06	2.0103e+06	3.62287e+06	2.90839e+06	2.28458e+06	3.87921e+06	2.18542e+06	3.33746e+06	1.13967e+06	1.22877e+06	1.07683e+06	4.64124e+06	1.20035e+06	801748	1.47275e+06	2.68962e+06	3.551e+06	4.27979e+06	1.29777e+06	4.24674e+06	6.27954e+06	1.97356e+06	4.39374e+06	1.01358e+06	971522	885726	1.07352e+06	1.2688e+06	3.14295e+06	3.53246e+06	2.64087e+06	3.72478e+06
LacCer t42:4_37.98	LacCer t42:4	37.98	C54 H97 N O14	-9.12	983.682	984.689	[M+H]+1	5.25304e+06	1.03917e+07	1.33013e+07	6.72482e+06	2.29402e+06	5.09527e+06	1.06032e+07	9.90826e+06	7.67393e+06	8.71216e+06	7.01642e+06	9.50415e+06	8.77133e+06	7.6773e+06	7.21993e+06	1.13102e+07	1.01476e+07	8.87946e+06	7.06801e+06	8.7589e+06	8.71874e+06	8.69757e+06	1.13313e+07	1.19847e+07	1.80243e+07	1.25344e+07	8.73023e+06	1.18977e+07	6.72177e+06	6.48526e+06	1.1642e+07	4.7989e+06	4.49682e+06	1.27125e+07	8.82979e+06	5.45687e+06	7.07708e+06	8.75683e+06	7.40145e+06	1.36259e+07	8.63848e+06	1.20861e+07
LacCer t42:4_27.69	LacCer t42:4	27.69	C54 H97 N O14	-1.3	983.69	984.697	[M+H]+1	4.60728e+06	4.422e+06	3.66466e+06	3.09407e+06	4.38021e+06	4.83217e+06	4.37541e+06	4.32524e+06	5.13188e+06	4.59712e+06	4.56563e+06	3.8871e+06	4.82058e+06	4.72638e+06	4.23229e+06	3.97676e+06	4.10356e+06	3.65031e+06	3.91206e+06	4.11599e+06	4.48484e+06	4.5249e+06	3.79472e+06	4.26938e+06	3.8956e+06	3.78019e+06	4.21525e+06	4.90725e+06	4.41004e+06	3.8963e+06	4.62515e+06	4.78774e+06	5.09749e+06	4.40488e+06	4.06119e+06	3.84511e+06	5.18331e+06	5.23561e+06	4.28948e+06	5.05762e+06	4.37729e+06	4.21109e+06
LacCer t42:5_30.01	LacCer t42:5	30.01	C54 H95 N O14	6.7	981.682	980.675	[M-H]-1	109725	108979	133598	173597	101515	122024	119074	112209	155508	121096	131178	136907	127449	149493	103414	118364	164763	134735	132545	156378	122410	150846	152020	122512	174755	160128	132024	101805	142580	132558	156944	134347	136600	130624	109444	131489	122311	144618	150701	162205	148875	125723
LacCer t43:0_34.84	LacCer t43:0	34.84	C55 H107 N O14	8.49	1005.78	1004.77	[M-H]-1	84054.3	105456	147618	137026	75998.8	71119.9	84736.8	78613.5	114095	110654	90952.2	125025	120652	103188	95163.9	99408.3	141163	149948	156367	102875	90745.7	101644	107817	76719	125795	122704	76531.5	152397	129429	106148	133438	113257	132362	82301.8	89797.7	154591	110541	107076	137083	101649	112176	109957
LacCer t44:4_3.4	LacCer t44:4	3.4	C56 H101 N O14	-2.75	1011.72	1012.73	[M+H]+1	5.1747e+07	5.20355e+07	7.49011e+07	5.4688e+07	5.08569e+07	5.97916e+07	4.77929e+07	6.25133e+07	9.9376e+07	5.80996e+07	5.9513e+07	5.07247e+07	5.42499e+07	3.58155e+07	5.65007e+07	6.22553e+07	3.81891e+07	4.78785e+07	210050	208310	188873	5.68664e+07	236700	212255	189403	4.67282e+07	5.18212e+07	7.26855e+07	8.2729e+07	6.82796e+07	9.54132e+07	5.49414e+07	6.31919e+07	186133	174338	134720	226539	172091	5.62404e+07	7.26633e+07	7.42532e+07	7.51037e+07
LacCer t44:5_24.66	LacCer t44:5	24.66	C56 H99 N O14	-2.14	1009.7	1010.71	[M+H]+1	549941	671986	1.10331e+06	535565	1.71527e+06	827256	546690	820714	1.24051e+06	2.42136e+06	2.23726e+06	468641	699608	742443	1.00268e+06	1.1794e+06	768473	737331	453072	1.93711e+06	457268	683406	471774	439798	1.39616e+06	989717	492847	2.61008e+06	697715	536168	1.64474e+06	312334	461983	751289	895302	698531	597492	1.01933e+06	573899	1.53351e+06	845205	567519
LacCer t45:0_35.59	LacCer t45:0	35.59	C57 H111 N O14	6.03	1033.81	1034.81	[M+H]+1	299952	446777	557010	467602	302218	325144	617412	409328	406122	481463	376062	564204	502403	322006	321381	1.11678e+06	484448	517096	364656	722419	361966	742450	421495	455632	460154	675700	406296	614609	369088	315802	629507	335390	420145	417492	272902	431569	562802	479016	328731	641109	425483	543599
LacCer t45:0_34.59	LacCer t45:0	34.59	C57 H111 N O14	9.45	1033.81	1034.82	[M+H]+1	156003	119180	195076	162445	66829	111344	252373	104400	110377	170270	122425	136656	200355	96450.8	116698	158502	156398	157397	122267	166101	113735	210088	115057	139635	174781	184680	89009	156964	131515	99445.7	196144	97547.1	174065	116864	81857.7	119008	146335	106626	110317	189721	120876	173940
LacCer t45:4_4.11	LacCer t45:4	4.11	C57 H103 N O14	-2.75	1025.74	1026.74	[M+H]+1	5.49231e+07	4.78037e+07	7.26943e+07	4.81809e+07	5.94138e+07	6.13068e+07	4.99559e+07	3.95485e+07	6.94598e+07	5.21348e+07	7.39894e+07	6.14804e+07	5.98095e+07	4.01484e+07	4.76839e+07	5.48162e+07	3.93854e+07	4.07804e+07	1.10135e+06	2.29908e+06	1.10273e+06	7.28761e+07	729109	1.15543e+06	868342	5.65607e+07	7.16118e+07	7.16656e+07	4.52346e+07	6.64024e+07	7.03301e+07	5.08378e+07	5.72948e+07	1.19094e+06	872526	896606	863117	818241	5.16246e+07	3.75964e+07	6.77767e+07	5.88348e+07
LacCer t45:6_35.57	LacCer t45:6	35.57	C57 H99 N O14	-6.03	1021.7	1020.69	[M-H]-1	65297.1	89681.1	138319	70979	85596.3	79058.1	68896.3	69272.8	77673.4	122439	68121.1	129237	71224.8	109341	92077.5	88491.2	101122	139826	135206	72110.4	80546.7	63163.5	65840.1	42901.4	108371	64286.9	88913.3	113763	123639	79344	104990	79831.3	107103	43156.5	87297.5	130717	97011.1	81410.9	109205	70621.1	75279.7	81214.1
LacCer t45:6_34.37	LacCer t45:6	34.37	C57 H99 N O14	-4.18	1021.7	1020.7	[M-H]-1	337381	378719	352945	333369	127816	235707	296768	267943	303555	295999	162299	257145	423469	304478	254236	256641	300624	266054	354079	313216	293006	262754	291544	258365	318719	242879	240978	384376	492162	266325	310120	276677	374834	263876	271986	288818	232942	297550	410777	340767	353141	377440
LacCer t45:6_24.69	LacCer t45:6	24.69	C57 H99 N O14	-0.68	1021.71	1022.71	[M+H]+1	192275	197125	277649	197723	813896	232987	119958	227388	417962	672175	827589	125312	154227	222313	295788	559624	197928	199093	128038	919159	171513	147068	149006	205183	307771	237629	186478	685332	331066	149511	424240	138400	153389	224710	185261	174610	179521	231570	153563	342299	199792	190706
LacCer t46:0_36.27	LacCer t46:0	36.27	C58 H113 N O14	6.97	1047.82	1048.83	[M+H]+1	311859	743859	561673	1.05109e+06	261215	261465	1.36234e+06	769600	655783	270635	221792	933863	541632	226586	628846	428864	871985	1.04911e+06	428176	206011	442598	845415	474506	697652	787212	993984	454362	1.18721e+06	371888	246887	515344	267941	521122	687559	195041	327690	582969	603009	271574	1.35767e+06	522893	618078
LacCer t46:0_37.12	LacCer t46:0	37.12	C58 H113 N O14	8.95	1047.83	1048.83	[M+H]+1	1.50741e+06	3.57655e+06	2.17147e+06	1.62538e+06	457797	1.66366e+06	6.21263e+06	3.77492e+06	2.03407e+06	1.97498e+06	1.69903e+06	4.29845e+06	4.24258e+06	1.57855e+06	2.73989e+06	3.58052e+06	2.36166e+06	1.41644e+06	1.37694e+06	2.28294e+06	3.71103e+06	4.43772e+06	2.97164e+06	3.97421e+06	3.2288e+06	3.74674e+06	3.66562e+06	4.25863e+06	2.12751e+06	1.49801e+06	2.82755e+06	1.22141e+06	1.45146e+06	1.46044e+06	1.70468e+06	2.47415e+06	1.26478e+06	2.18953e+06	3.00442e+06	6.52929e+06	3.39794e+06	4.30236e+06
LacCer t46:3_4.21	LacCer t46:3	4.21	C58 H107 N O14	-9.92	1041.76	521.887	[M+2H]+2	1.61112e+08	1.70009e+08	1.94514e+08	2.10759e+08	2.00331e+08	2.00019e+08	1.56081e+08	1.95144e+08	2.88612e+08	1.85405e+08	2.22187e+08	1.36235e+08	1.5996e+08	1.79714e+08	1.37719e+08	2.09474e+08	1.6313e+08	1.47117e+08	591929	1.23566e+06	592674	2.14336e+08	391865	620996	433965	1.70474e+08	1.78219e+08	1.55015e+08	2.63519e+08	3.28147e+08	2.41507e+08	1.90604e+08	2.32893e+08	640078	468946	481888	463889	439770	1.83087e+08	1.37834e+08	2.21422e+08	2.94832e+08
LacCer t46:4_5.16	LacCer t46:4	5.16	C58 H105 N O14	-2.15	1039.75	1040.76	[M+H]+1	2.4874e+07	2.83404e+07	6.44075e+07	3.15139e+07	3.16947e+07	3.16209e+07	2.65168e+07	2.42753e+07	3.2307e+07	2.84443e+07	3.52265e+07	3.17268e+07	2.80796e+07	3.75431e+07	3.12538e+07	3.69536e+07	3.1281e+07	2.52219e+07	185016	351391	174641	2.79481e+07	184897	189850	192777	2.71758e+07	2.90584e+07	3.76148e+07	3.09936e+07	4.09705e+07	4.21495e+07	2.6153e+07	3.15103e+07	152897	147052	153048	158276	148492	3.00443e+07	3.57704e+07	3.99335e+07	3.86133e+07
LacCer t46:5_7.55	LacCer t46:5	7.55	C58 H103 N O14	9.04	1037.75	1038.75	[M+H]+1	183152	220680	256819	238099	320312	325243	351908	202816	206356	276375	271277	181977	208804	818605	232034	251945	177454	176790	252566	272320	228410	225939	254422	186594	239753	201470	203317	266856	230266	191009	244642	217726	228876	201021	189264	212779	211071	257480	205279	230680	249202	219922
LacCer t47:1_35.33	LacCer t47:1	35.33	C59 H113 N O14	9.43	1059.83	1060.83	[M+H]+1	236361	380186	514050	571953	206769	271267	689623	267025	406661	362392	200679	336954	419419	235697	254173	277987	479922	450366	302884	478280	311496	454778	377107	378109	456809	453022	242647	599857	480372	430558	500144	343464	305191	445782	379069	439979	534864	339903	374066	524492	335606	371518
LacCer t47:3_5.08	LacCer t47:3	5.08	C59 H109 N O14	-9.85	1055.77	528.894	[M+2H]+2	1.09766e+08	7.10166e+07	1.37666e+08	1.30615e+08	1.16477e+08	1.12327e+08	8.70689e+07	1.16862e+08	1.57451e+08	1.13848e+08	1.34543e+08	9.99499e+07	1.20179e+08	1.12515e+08	7.16837e+07	1.34471e+08	1.06937e+08	9.76793e+07	215886	410020	203780	1.27175e+08	215746	221526	224942	1.01637e+08	9.58739e+07	1.21992e+08	1.46999e+08	1.34128e+08	1.40289e+08	7.36244e+07	1.08232e+08	178408	171588	178584	184684	173268	9.86263e+07	1.06072e+08	1.39575e+08	1.30032e+08
LacCer t47:4_6.12	LacCer t47:4	6.12	C59 H107 N O14	-1.37	1053.77	1054.77	[M+H]+1	1.00742e+07	9.70786e+06	1.35194e+07	1.14118e+07	8.696e+06	1.18587e+07	9.27207e+06	1.2862e+07	1.50288e+07	1.13933e+07	1.41029e+07	9.6003e+06	1.11691e+07	1.19983e+07	1.04427e+07	1.46308e+07	7.20563e+06	1.04298e+07	760777	3.20182e+06	917373	6.73215e+06	685285	625977	944821	7.40894e+06	8.00129e+06	1.31513e+07	2.05169e+07	1.26849e+07	9.93043e+06	1.00201e+07	1.11944e+07	948857	841690	945549	714655	807580	1.01498e+07	7.35095e+06	1.21077e+07	1.37094e+07
LacCer t48:3_6.14	LacCer t48:3	6.14	C60 H111 N O14	-9.1	1069.79	535.903	[M+2H]+2	3.67655e+07	4.17953e+07	4.87288e+07	4.65134e+07	3.91369e+07	4.28176e+07	3.68605e+07	3.76046e+07	5.59169e+07	2.98269e+07	3.43904e+07	3.6436e+07	4.07921e+07	4.17353e+07	4.10404e+07	4.30752e+07	4.28421e+07	3.70325e+07	627717	2.03026e+06	657874	4.20891e+07	525431	515472	775043	3.2983e+07	3.73648e+07	4.85441e+07	6.8498e+07	4.21862e+07	5.35435e+07	2.41532e+07	4.50708e+07	716043	620422	742067	593996	686887	3.71594e+07	4.7997e+07	5.73913e+07	5.27074e+07
LacCer t49:3_7.33	LacCer t49:3	7.33	C61 H113 N O14	-8	1083.81	542.911	[M+2H]+2	5.51941e+06	8.09831e+06	8.58379e+06	9.68529e+06	6.23695e+06	8.45002e+06	5.77779e+06	8.35074e+06	1.26021e+07	9.18896e+06	1.14831e+07	8.50431e+06	8.45899e+06	7.58318e+06	9.06957e+06	7.55229e+06	8.56453e+06	7.61108e+06	542423	322385	388114	7.11124e+06	524648	345725	448476	6.82438e+06	5.45702e+06	8.69718e+06	1.07028e+07	1.18624e+07	7.90771e+06	8.19334e+06	7.1908e+06	400553	413672	466447	427266	427460	8.84616e+06	6.98869e+06	1.20735e+07	1.18617e+07
LacCer t50:0_39.17	LacCer t50:0	39.17	C62 H121 N O14	-6.57	1103.87	1104.88	[M+H]+1	4.20089e+06	5.23817e+06	5.94951e+06	5.96464e+06	5.86353e+06	2.08071e+06	4.12763e+06	4.19926e+06	5.60875e+06	4.84992e+06	3.4237e+06	4.44001e+06	4.2113e+06	3.6398e+06	3.54278e+06	3.74247e+06	6.19656e+06	5.87796e+06	4.94137e+06	8.3584e+06	3.10835e+06	4.2257e+06	4.76009e+06	7.50152e+06	4.59039e+06	6.937e+06	3.79093e+06	4.27484e+06	4.90476e+06	5.80761e+06	5.74081e+06	3.71241e+06	3.65145e+06	5.55959e+06	7.53522e+06	4.80291e+06	5.11515e+06	4.96714e+06	3.32051e+06	5.28531e+06	4.95046e+06	5.30034e+06
LacCer t50:3_15.42	LacCer t50:3	15.42	C62 H115 N O14	-8.84	1097.82	549.918	[M+2H]+2	1.23931e+06	1.48546e+06	701769	1.05707e+06	2.18131e+06	1.69926e+06	1.35867e+06	819204	2.80896e+06	1.85284e+06	901481	1.2598e+06	802820	811279	1.86743e+06	1.62558e+06	1.10344e+06	834406	1.28796e+06	1.06758e+06	947097	1.75779e+06	1.07361e+06	2.26917e+06	1.76604e+06	709826	1.3396e+06	4.02605e+06	4.52173e+06	2.61547e+06	1.06855e+06	1.31569e+06	1.08164e+06	975621	1.12333e+06	683631	1.53177e+06	1.21466e+06	2.19094e+06	2.85195e+06	833368	1.1697e+06
LacCer t50:3_8.57	LacCer t50:3	8.57	C62 H115 N O14	-7.67	1097.82	549.919	[M+2H]+2	824628	797531	1.17417e+06	1.36371e+06	1.53806e+06	1.04525e+06	697481	1.10146e+06	1.6333e+06	1.32404e+06	1.11251e+06	773585	1.10889e+06	1.17792e+06	1.00977e+06	1.36102e+06	778661	861602	289796	276044	385682	744527	354427	331538	479825	1.15171e+06	1.05838e+06	1.04223e+06	1.5428e+06	1.04129e+06	1.47306e+06	841298	1.05639e+06	333416	387022	421089	454924	401467	1.22002e+06	1.20691e+06	1.60511e+06	1.08046e+06
Lyso GM1 d15:0_17.89	Lyso GM1 d15:0	17.89	C52 H93 N3 O30	7.49	1239.59	1240.6	[M+H]+1	76197.7	60536.6	80927.1	98260.2	98307.5	122018	113694	61636.4	79767.6	54767.8	78812.9	58583.8	76946.2	63299.2	68508.1	67164.7	84871.8	98123.2	178824	109796	89723.3	53871.3	140560	82937.2	92346	69036.6	53074.6	63104.7	75563.3	69829.5	72552.3	69239.4	79548.8	597418	123565	115331	252435	136087	67516.2	95032.7	82577.1	69238
Lyso GM1 d23:2_21.68	Lyso GM1 d23:2	21.68	C60 H105 N3 O30	-0.52	1347.68	674.846	[M+2H]+2	387301	279611	397163	433436	328054	353635	428616	306592	428743	419070	462709	481861	360478	391895	257759	293501	340281	306084	4.71522e+06	2.68994e+06	1.86752e+06	418476	3.32519e+06	5.76141e+06	4.27627e+06	327165	351459	408774	336980	378171	643996	1.12028e+06	264872	7.6323e+06	5.32243e+06	4.15576e+06	6.74675e+06	3.72751e+06	456294	486021	632999	409806
Lyso GM1 d24:2_9.41	Lyso GM1 d24:2	9.41	C61 H107 N3 O30	-0.27	1361.69	681.854	[M+2H]+2	25780.4	35734.2	33142.1	33260.8	44586.3	29220.4	33457.5	29107.9	48126.4	51925.4	38064	30503.4	34983.8	31593.1	33211.4	36878.6	32121	26665	148861	84131.8	88136.6	34752.4	185865	128618	154185	42093.1	31506.6	39120.5	26934.8	26729.7	31056.3	28777	30967.1	102444	92188.9	136120	98409.9	148126	32273.2	53847.4	33783.9	37936.7
Lyso GM1 d25:2_15.54	Lyso GM1 d25:2	15.54	C62 H109 N3 O30	-5.96	1375.7	688.858	[M+2H]+2	173447	190666	218646	212430	312503	235423	254319	236860	181238	166281	310104	194176	218260	171125	254357	272804	160990	165342	199539	219930	220084	208180	219589	367986	245092	253302	220472	203355	237222	207085	191487	175578	198766	265339	242829	246646	294094	278680	174690	159113	185233	197372
N-Acetyl-psychosine d22:5_8.72	N-Acetyl-psychosine d22:5	8.72	C30 H49 N O8	-3.33	551.344	552.351	[M+H]+1	701010	971575	991305	528530	841961	907858	3.90444e+06	546163	831987	1.06279e+06	949840	1.01486e+06	759506	703164	842592	767696	500407	369723	518978	620028	655839	1.09596e+06	702381	759402	709929	1.32916e+06	1.17398e+06	1.1364e+06	693122	674077	884897	1.0584e+06	342672	850704	483608	473954	461498	781573	708383	739097	665123	863126
N-Acetyl-psychosine d23:3_7.6	N-Acetyl-psychosine d23:3	7.6	C31 H55 N O8	-7.83	569.388	570.396	[M+H]+1	106381	252765	144276	133759	179944	518644	1.22915e+06	452355	1.22244e+06	824926	503754	102231	133452	814229	4.02614e+06	1.99891e+06	98481.6	2.46098e+06	2.00985e+06	596823	128316	174742	897873	104825	695559	2.0407e+06	1.26804e+06	1.67195e+06	986568	855263	2.32343e+06	239528	1.73121e+06	345819	555571	119535	118575	154106	115321	129591	118294	119502
N-Acetyl-psychosine d28:5_15.34	N-Acetyl-psychosine d28:5	15.34	C36 H61 N O8	1.1	635.44	636.448	[M+H]+1	80575.6	70244.5	96581.7	107236	116809	100500	114015	93787.7	76666.3	72475.1	95529.9	73256.5	96182.6	75780.7	90902.2	84011.6	72560.6	83821	152333	97236.8	101552	86125	105845	105674	114054	111590	90611.5	90693.2	91961.8	93322.8	86418.2	72658.3	68979.5	122329	125035	121722	169130	110624	77846.9	71402.5	73175.4	96354.4
N-Acetyl-psychosine d28:5_22.2	N-Acetyl-psychosine d28:5	22.2	C36 H61 N O8	6.42	635.444	636.451	[M+H]+1	110114	139659	122804	171260	238625	159147	137635	127646	238427	256753	299020	120403	158715	143410	155028	163337	130179	137543	121028	144394	120199	105358	115149	130319	222958	137674	124503	365291	133126	103895	160686	121841	137754	123550	118861	121305	121065	131714	120722	205220	145282	116365
N-Acetyl-psychosine m15:0_2.45	N-Acetyl-psychosine m15:0	2.45	C23 H45 N O7	0.43	447.32	448.327	[M+H]+1	980323	1.66541e+06	785797	1.96812e+06	1.42821e+06	1.53599e+06	1.40817e+06	1.22105e+06	1.97112e+06	1.76971e+06	945559	1.42324e+06	1.78943e+06	1.03818e+06	681374	1.15696e+06	837312	832491	134775	138780	125667	1.79383e+06	171139	148825	142853	1.00801e+06	1.02505e+06	575926	1.43295e+06	1.19619e+06	882269	1.04943e+06	3.2889e+06	169889	136185	146606	170327	111976	1.01325e+06	1.20571e+06	1.56352e+06	2.94365e+06
N-Acetyl-psychosine m17:0_4.27	N-Acetyl-psychosine m17:0	4.27	C25 H49 N O7	0.77	475.351	476.359	[M+H]+1	515893	496828	455633	518347	626372	575612	522412	452978	946488	873492	608357	461998	471385	500082	441286	564403	502000	403642	222622	440278	229618	517724	159142	269110	186024	432489	327853	735896	602601	387561	444449	528220	484202	282963	207310	199058	205074	179138	412205	516077	605617	664311
N-Acetyl-psychosine m17:1_2.87	N-Acetyl-psychosine m17:1	2.87	C25 H47 N O7	1.74	473.336	474.343	[M+H]+1	1.89276e+06	1.74187e+06	718320	1.95194e+06	1.02316e+06	1.48816e+06	1.77173e+06	1.3484e+06	2.03538e+06	1.53395e+06	893644	1.59031e+06	1.71278e+06	1.24399e+06	703988	1.0537e+06	1.23312e+06	717543	69340.2	84899.1	75406.9	1.93192e+06	89036.7	57775	71067.3	713618	975741	696498	1.82291e+06	998207	958173	1.10432e+06	2.33442e+06	64198.3	58336.3	50705.7	66080.9	55672.1	1.02804e+06	1.03295e+06	1.60982e+06	1.69861e+06
N-Acetyl-psychosine m17:2_7.48	N-Acetyl-psychosine m17:2	7.48	C25 H45 N O7	2	471.321	472.328	[M+H]+1	474857	284080	96981	319751	407299	470393	415723	446418	364169	431964	529756	432691	429218	404034	480154	437330	369379	284542	349074	396160	466464	287092	380231	536139	393454	381470	470214	495947	145430	560180	545303	318429	364636	617051	343589	500530	372393	554938	533589	365467	425437	406398
N-Acetyl-psychosine m18:2_2.01	N-Acetyl-psychosine m18:2	2.01	C26 H47 N O7	1.32	485.336	486.343	[M+H]+1	3.35232e+06	3.77831e+06	1.97388e+08	3.93891e+06	3.26586e+06	4.05107e+06	4.77315e+06	3.8386e+06	4.30676e+06	4.00495e+06	3.77907e+06	4.51593e+06	4.38732e+06	3.78092e+06	2.46981e+06	3.8754e+06	2.64819e+06	2.61826e+06	3.79622e+06	3.49939e+06	2.82427e+06	5.60351e+06	4.26733e+06	3.9937e+06	4.38871e+06	2.65893e+06	2.40673e+06	2.29245e+06	4.43463e+07	2.75161e+06	2.81181e+06	2.50957e+06	4.08911e+06	4.45609e+06	3.50211e+06	3.30462e+06	5.4181e+06	4.32135e+06	3.37101e+06	4.34485e+06	4.32454e+06	3.39358e+06
N-Acetyl-psychosine m21:4_6.42	N-Acetyl-psychosine m21:4	6.42	C29 H49 N O7	6.6	523.354	524.362	[M+H]+1	6.94184e+06	1.04444e+07	1.88267e+07	9.80805e+06	7.36776e+07	3.3478e+07	9.14206e+06	7.31531e+06	3.56457e+07	6.62232e+07	5.89481e+07	8.04163e+06	5.42316e+06	9.35735e+06	2.53231e+07	4.23705e+07	1.08224e+07	8.5799e+06	5.94631e+06	3.0633e+07	9.89996e+06	6.70179e+06	5.43776e+06	9.11684e+06	7.2146e+06	1.45045e+07	3.34713e+06	5.56475e+07	7.99029e+06	7.70431e+06	1.67725e+07	1.14287e+07	5.61925e+06	1.83517e+07	8.38389e+06	9.67959e+06	7.95504e+06	7.28195e+06	5.73547e+06	2.98376e+07	8.99589e+06	9.32313e+06
N-Acetyl-psychosine m23:4_25.99	N-Acetyl-psychosine m23:4	25.99	C31 H53 N O7	-1.08	551.382	550.374	[M-H]-1	134743	149409	205966	425855	255265	215774	126275	122460	390362	419795	300404	148985	144264	262732	187983	235724	262738	162529	169653	357846	154646	135975	186756	98003.9	285888	144518	149842	366634	156389	114148	228004	154407	186324	117110	126046	177985	185214	284086	185591	373951	224244	139120
N-Acetyl-psychosine m24:1_8.38	N-Acetyl-psychosine m24:1	8.38	C32 H61 N O7	0.72	571.445	572.452	[M+H]+1	81757.4	103005	107952	84305	103925	141768	190683	99163.2	100092	84334.5	94093	120598	121748	88654.7	78747.2	167221	88392.1	75421.9	721899	211260	161829	130106	147308	139111	201331	117258	127137	107137	604591	102850	102908	108936	102448	139899	599874	176686	190883	168453	103668	112962	100927	101330
N-Acetyl-psychosine m24:2_19.46	N-Acetyl-psychosine m24:2	19.46	C32 H59 N O7	-2.62	569.428	570.435	[M+H]+1	8.94653e+06	4.37225e+06	5.72621e+06	8.06023e+06	1.24306e+06	2.76417e+06	6.76122e+06	4.32445e+06	5.49852e+06	5.36647e+06	4.54495e+06	1.41386e+06	9.80701e+06	6.33178e+06	3.24848e+06	1.04813e+07	9.74312e+06	5.27542e+06	2.98322e+06	5.07222e+06	4.23219e+06	5.91097e+06	2.95323e+06	4.76531e+06	3.32984e+06	7.6279e+06	2.75063e+06	1.07731e+07	1.16649e+07	4.27296e+06	6.55727e+06	8.55173e+06	1.18663e+07	3.95448e+06	9.32621e+06	7.59524e+06	5.90618e+06	5.53852e+06	5.32843e+06	1.12226e+07	3.94394e+06	2.20249e+06
N-Acetyl-psychosine m24:2_23.38	N-Acetyl-psychosine m24:2	23.38	C32 H59 N O7	9.76	569.435	570.442	[M+H]+1	5.73819e+06	5.68619e+06	1.70947e+06	2.5204e+06	933930	2.51205e+06	3.63294e+06	912443	1.30912e+06	4.25317e+06	895711	425397	2.74937e+06	598117	667277	4.09881e+06	935568	2.12224e+06	802360	987112	1.07439e+06	2.45645e+06	493366	723641	3.05935e+06	1.66035e+06	504201	2.25042e+06	1.45632e+06	582822	6.68945e+06	582233	2.34126e+06	3.12621e+06	540071	1.12867e+06	831455	1.32942e+06	594653	4.48454e+06	1.08372e+06	4.95332e+06
N-Acetyl-psychosine m24:3_29.08	N-Acetyl-psychosine m24:3	29.08	C32 H57 N O7	0.69	567.414	566.407	[M-H]-1	333452	175538	306556	230632	236748	333192	227515	167588	423646	237772	321282	150891	220442	253436	208658	214285	272673	187160	178092	322542	284669	341363	177696	152614	187177	143508	170005	286435	292881	129823	172047	160519	221070	214599	179314	302314	324679	272237	303890	289980	310101	171787
N-Acetyl-psychosine m25:2_22.36	N-Acetyl-psychosine m25:2	22.36	C33 H61 N O7	-1.18	583.444	584.451	[M+H]+1	325456	345645	351613	277202	845738	409875	255789	395793	454098	712868	1.39435e+06	268355	272973	289258	478125	483016	366538	317941	312193	655749	356768	263349	321878	344855	695523	334194	335217	616448	362766	257700	429128	284896	343764	480189	344036	341248	295100	313623	269823	385502	302622	281095
N-Acetyl-psychosine t25:3_16.76	N-Acetyl-psychosine t25:3	16.76	C33 H59 N O9	1.55	613.42	614.427	[M+H]+1	4.19384e+06	4.37649e+06	1.81104e+06	1.27115e+06	3.09983e+06	2.9008e+06	2.73776e+06	1.98483e+06	738891	1.77699e+06	4.82535e+06	1.86558e+06	2.65296e+06	802912	4.20002e+06	1.62006e+06	656648	2.806e+06	1.83142e+06	922010	1.98587e+06	3.09572e+06	194849	3.63133e+06	437573	5.44131e+06	1.77636e+06	3.06923e+06	2.23713e+06	2.78082e+06	1.244e+06	1.04783e+06	218322	4.80113e+06	3.2337e+06	1.68956e+06	1.66477e+06	946422	1.21833e+06	617679	3.75093e+06	996807
N-Acetyl-psychosine t26:5_10.77	N-Acetyl-psychosine t26:5	10.77	C34 H57 N O9	7.3	623.408	624.415	[M+H]+1	131283	175953	160781	212723	195972	121675	351260	184708	140231	158780	155151	134192	240295	125747	144822	143073	103473	265947	200928	210255	179741	197342	225979	245464	197410	151727	195302	123470	117580	135880	193729	626224	142222	212892	224012	167553	224180	180275	151782	145153	165787	171902
Psychosine d18:0_3.81	Psychosine d18:0	3.81	C24 H49 N O7	4.62	463.353	464.36	[M+H]+1	258145	343566	326813	376594	323447	321144	330128	301981	845327	460518	327482	370504	334022	325439	231672	312867	350857	216145	25501.4	39952.2	28640.1	359156	24910.7	24183.8	25533.5	320822	248485	315378	366979	264188	313628	322515	380769	35267.2	24191.7	20848.9	23277.1	22437.1	291693	376801	337788	417043
Sulfatide d32:0_8.79	Sulfatide d32:0	8.79	C38 H75 N O11 S	-8	753.5	754.507	[M+H]+1	109680	442187	799920	61085.9	146524	82242.5	1.8251e+07	160416	396370	334938	114724	470998	325385	264710	203839	132922	130788	59478.2	599598	407729	83960	1.51747e+06	685457	189438	132098	2.5101e+06	879182	102151	627612	74632.3	69495.8	1.29491e+06	58253.9	100569	213244	100755	104798	500722	62917.2	77430.6	174437	427593
Sulfatide d34:2_8.42	Sulfatide d34:2	8.42	C40 H75 N O11 S	-6.11	777.501	778.509	[M+H]+1	68872.4	96615.3	90938.9	71018.5	87546.4	119425	1.55785e+06	83535.1	84317.1	72801.9	79263.9	101591	102560	77637.1	74281.3	70661.6	75251.7	72081.8	102433	97572.1	136325	109601	125278	117187	169602	100608	107101	90252.6	79091	86641.2	86690	91767.4	85669	117851	136799	148840	160800	141905	87330	96823.9	85020.6	85360.8
Sulfatide d34:3_8.59	Sulfatide d34:3	8.59	C40 H73 N O11 S	-9.86	775.483	776.49	[M+H]+1	38357.9	47893.3	40295.3	35274	47766.4	46626	1.69999e+06	45452.7	46006.1	40499.2	44241.5	50088.2	44968.9	41221.1	43448.6	41305.5	41626.5	43920.2	64139.4	45162.8	54767.1	40211.9	59767.6	50370	60392.4	53030.8	44407.3	48603.1	40676.4	37802.8	40712	48871.2	43673.9	55858.7	67046.7	59185.4	61213.1	51457.4	38495.4	49846.8	38626.4	43650
Sulfatide d35:1_24.44	Sulfatide d35:1	24.44	C41 H79 N O11 S	-0.02	793.537	792.53	[M-H]-1	1.13322e+06	910042	1.61394e+06	1.32132e+06	1.89908e+06	1.70181e+06	1.1286e+06	1.17501e+06	2.87415e+06	2.83597e+06	2.78777e+06	1.37279e+06	1.16979e+06	1.84194e+06	1.66139e+06	1.66819e+06	1.65339e+06	999801	1.20123e+06	3.35454e+06	950917	1.60916e+06	1.41672e+06	656218	2.05207e+06	1.09798e+06	1.04639e+06	2.70296e+06	1.22825e+06	986887	2.08513e+06	621491	1.04045e+06	1.31908e+06	1.06461e+06	1.29079e+06	1.13675e+06	2.43795e+06	1.35216e+06	2.83968e+06	1.83789e+06	1.32956e+06
Sulfatide d36:1_25.56	Sulfatide d36:1	25.56	C42 H81 N O11 S	-0.74	807.552	806.545	[M-H]-1	7.45509e+06	6.47881e+06	8.57956e+06	1.30471e+07	1.17029e+07	9.80411e+06	7.64461e+06	5.25433e+06	1.35059e+07	1.14642e+07	1.14267e+07	8.73279e+06	6.6562e+06	1.35895e+07	7.79823e+06	9.18911e+06	1.28173e+07	7.05762e+06	8.42847e+06	1.36633e+07	1.00062e+07	7.81668e+06	1.06106e+07	5.31743e+06	9.99689e+06	6.25173e+06	8.10491e+06	1.37939e+07	8.23712e+06	6.13073e+06	9.32015e+06	8.22367e+06	6.67689e+06	6.22707e+06	7.58485e+06	7.39455e+06	9.82606e+06	1.17973e+07	1.23126e+07	1.36428e+07	9.67301e+06	7.4238e+06
Sulfatide d37:1_26.69	Sulfatide d37:1	26.69	C43 H83 N O11 S	-0.01	821.569	820.561	[M-H]-1	668838	383425	787188	771458	811351	868613	663510	417062	1.26335e+06	1.06892e+06	1.02185e+06	476923	543046	688219	627942	706528	915806	483130	482163	1.40436e+06	553019	754420	583751	397144	741670	467283	468417	1.14044e+06	552513	362374	706868	469091	424736	457347	381756	627724	665392	1.19473e+06	750415	1.06276e+06	681540	498702
Sulfatide d38:0_28.46	Sulfatide d38:0	28.46	C44 H87 N O11 S	-0.5	837.6	836.592	[M-H]-1	538420	503508	735872	1.41462e+06	617843	691177	453732	474529	1.41847e+06	1.11033e+06	820549	580297	494414	977760	687099	654829	1.35701e+06	545298	611878	1.05867e+06	466178	641519	994582	457313	1.00594e+06	604811	463487	927001	474856	542985	765975	531770	695564	336337	428446	441165	833220	934045	917986	1.56266e+06	658929	529141
Sulfatide d38:1_27.72	Sulfatide d38:1	27.72	C44 H85 N O11 S	0.43	835.585	834.578	[M-H]-1	1.30915e+07	1.26315e+07	1.2755e+07	1.24474e+07	1.27389e+07	1.39137e+07	1.23296e+07	1.28148e+07	1.30525e+07	1.27783e+07	1.26742e+07	1.26612e+07	1.2698e+07	1.39747e+07	1.266e+07	1.26953e+07	1.32621e+07	1.25803e+07	1.27062e+07	1.29383e+07	1.24885e+07	1.30972e+07	1.29129e+07	1.27675e+07	1.27359e+07	1.21773e+07	1.28692e+07	1.32416e+07	1.24526e+07	1.3674e+07	1.23472e+07	1.24096e+07	1.33523e+07	1.30329e+07	1.30181e+07	1.23772e+07	1.26277e+07	1.27078e+07	1.29717e+07	1.29931e+07	1.27568e+07	1.24752e+07
Sulfatide d38:1_36.91	Sulfatide d38:1	36.91	C44 H85 N O11 S	9.97	835.593	834.585	[M-H]-1	72411.2	48710.5	74289.7	74610.2	43084.6	87637.1	75996.3	41200.2	50575.6	65476.5	59485.8	50942.1	61699.3	58219.3	57022	51709.1	54458.2	48867.8	42466.7	63156.6	49615.7	58880.7	48483.7	51760.6	52229.6	50618.9	58983.9	44651.2	75275.5	64059.6	54297.2	46449.3	52099.8	48786.2	74667.1	59523.8	58826.5	43268.9	86506.1	52139.9	47838.9	52018.4
Sulfatide d39:0_2.68	Sulfatide d39:0	2.68	C45 H89 N O11 S	-7.76	851.609	852.616	[M+H]+1	4.50134e+07	3.95632e+07	6.41621e+07	5.36375e+07	5.90488e+07	5.22815e+07	3.54317e+07	4.56008e+07	6.99502e+07	4.00823e+07	5.31414e+07	6.02087e+07	5.29394e+07	5.85597e+07	4.70773e+07	5.49907e+07	4.50702e+07	3.85584e+07	265606	229768	198096	6.78004e+07	212395	174499	279981	3.95411e+07	4.17778e+07	5.29646e+07	6.98117e+07	5.40821e+07	5.9967e+07	3.52013e+07	4.87147e+07	248242	158484	154040	209890	176314	3.63892e+07	5.45642e+07	5.9389e+07	5.76772e+07
Sulfatide d39:1_27.91	Sulfatide d39:1	27.91	C45 H87 N O11 S	-8.54	849.593	848.585	[M-H]-1	2.06395e+07	2.8288e+07	3.40244e+07	2.53791e+07	3.569e+07	1.91428e+07	2.27986e+07	2.18087e+07	2.10541e+07	3.39323e+07	3.18709e+07	1.27689e+07	1.91731e+07	1.58778e+07	2.96457e+07	3.0828e+07	2.45249e+07	2.80286e+07	2.29313e+07	1.56198e+07	1.65777e+07	1.8266e+07	1.15707e+07	2.55826e+07	2.37564e+07	3.07066e+07	1.99589e+07	3.8643e+07	2.23729e+07	2.04634e+07	2.54229e+07	1.83504e+07	1.26578e+07	1.65589e+07	2.22259e+07	1.76121e+07	1.93388e+07	2.51849e+07	1.77381e+07	3.07474e+07	1.35524e+07	1.74582e+07
Sulfatide d39:1_29.72	Sulfatide d39:1	29.72	C45 H87 N O11 S	1.23	849.601	848.594	[M-H]-1	1.09061e+06	1.09234e+06	2.22907e+06	2.76525e+06	1.28236e+06	1.12302e+06	1.26428e+06	1.39179e+06	2.60443e+06	4.38913e+06	2.39526e+06	613003	1.16038e+06	638433	2.24723e+06	1.81916e+06	2.29192e+06	1.71764e+06	696233	1.30684e+06	841088	730662	575167	1.38202e+06	2.0049e+06	2.10934e+06	1.17631e+06	2.42104e+06	630418	1.71507e+06	968078	1.27971e+06	847773	491124	903411	426864	1.24229e+06	1.21518e+06	830332	4.21074e+06	936063	597799
Sulfatide d40:0_30.4	Sulfatide d40:0	30.4	C46 H91 N O11 S	0.06	865.631	864.624	[M-H]-1	100598	88098.2	121101	126518	154556	147419	112316	106208	150346	173924	168481	104604	106395	142311	100413	119287	148759	101145	100290	177259	117683	99807.2	108614	98979.1	177777	112567	101044	155998	195213	88240.7	164179	105581	129180	133074	103179	125462	99457.6	142473	119274	147178	146480	109886
Sulfatide d40:2_27.59	Sulfatide d40:2	27.59	C46 H87 N O11 S	-0.51	861.6	860.592	[M-H]-1	1.11096e+07	1.07453e+07	1.05961e+07	1.07019e+07	1.06928e+07	1.08474e+07	1.01179e+07	1.08786e+07	1.10456e+07	1.09996e+07	1.08539e+07	1.07173e+07	1.08853e+07	1.06451e+07	1.15776e+07	1.06186e+07	1.1271e+07	1.05905e+07	1.08771e+07	1.06364e+07	1.06325e+07	1.08463e+07	1.1401e+07	1.09449e+07	1.08545e+07	1.04389e+07	1.0679e+07	1.04226e+07	1.07968e+07	1.1722e+07	1.09398e+07	1.04098e+07	1.04368e+07	1.08627e+07	1.11598e+07	1.10337e+07	1.06369e+07	1.05848e+07	1.09348e+07	1.11383e+07	1.16972e+07	1.10899e+07
Sulfatide d40:3_28.87	Sulfatide d40:3	28.87	C46 H85 N O11 S	-7.35	859.578	858.571	[M-H]-1	137855	87327.6	146933	144438	119881	160272	130686	89805.6	208749	136016	177518	100572	102075	167852	94785.2	130245	162900	92802.9	95841.3	179730	218111	167793	107760	85859.7	106794	90648	94967.7	141619	164439	75723.4	106621	98392.3	108044	103144	94868.1	188064	184713	170535	144053	150852	158160	108594
Sulfatide d40:3_30.19	Sulfatide d40:3	30.19	C46 H85 N O11 S	6.83	859.59	858.583	[M-H]-1	108976	99821.1	109535	160023	88707.5	123157	115141	122562	153944	111175	127567	121860	120293	159296	95943.8	131201	184822	116672	108806	158369	142851	126391	135551	115392	162799	121017	188350	267994	229773	107942	162026	123058	130956	123179	112627	123981	151494	184530	132115	158068	160414	121402
Sulfatide d40:4_21.99	Sulfatide d40:4	21.99	C46 H83 N O11 S	8.79	857.576	858.583	[M+H]+1	147919	159498	150057	190845	193905	150712	148914	224855	204091	238370	257349	169598	141324	175791	152880	162583	164311	165763	166125	204714	170091	144249	179640	202372	218838	189478	136760	441713	165516	138051	182552	146796	177788	178101	168830	175757	174389	162568	157410	187116	172074	179937
Sulfatide d41:0_3.93	Sulfatide d41:0	3.93	C47 H93 N O11 S	-8.1	879.64	880.647	[M+H]+1	6.51202e+07	5.92648e+07	9.40727e+07	8.40488e+07	7.73821e+07	7.80035e+07	5.66874e+07	5.01616e+07	8.34191e+07	6.00938e+07	8.61274e+07	7.99278e+07	7.73096e+07	7.01642e+07	6.75112e+07	5.82629e+07	5.09584e+07	5.71132e+07	114587	288190	155445	8.92899e+07	97250.2	128493	126963	6.42385e+07	6.63539e+07	8.58504e+07	9.29233e+07	7.15789e+07	9.64678e+07	5.17486e+07	8.87156e+07	171385	139884	146498	110165	130148	5.26051e+07	6.99356e+07	7.71212e+07	9.26443e+07
Sulfatide d41:0_31.28	Sulfatide d41:0	31.28	C47 H93 N O11 S	0.01	879.647	878.64	[M-H]-1	309995	419513	314653	365916	633715	468623	326581	434305	559677	531390	550445	397342	291406	449463	311788	511472	392132	255290	249172	622642	428259	307736	292467	319624	496630	452173	450672	488194	708536	299652	550839	295512	466247	564035	421931	326272	240163	424435	562492	576354	565313	383311
Sulfatide d41:0_34.41	Sulfatide d41:0	34.41	C47 H93 N O11 S	9.19	879.655	880.662	[M+H]+1	278895	427572	466590	358742	158169	233178	515281	256266	388864	410270	214568	275268	434909	281599	264849	449116	413048	324506	337916	388640	345461	386063	260294	307351	467275	419061	230374	650079	635269	245459	468051	300834	426486	341587	212028	342084	310806	300243	315682	539813	365564	525016
Sulfatide d41:1_29.72	Sulfatide d41:1	29.72	C47 H91 N O11 S	-0.4	877.631	876.616	[M-H]-1	399043	430841	950641	1.41166e+06	1.22363e+06	652413	669808	652057	1.1195e+06	1.31376e+06	871792	265399	463118	1.08218e+06	973684	500728	788041	626096	256906	1.01271e+06	416036	348075	405558	555196	1.09427e+06	760147	374188	874341	568271	729343	854842	377523	317022	617097	381430	396632	600432	536202	439638	1.61896e+06	376189	343664
Sulfatide d41:1_29.26	Sulfatide d41:1	29.26	C47 H91 N O11 S	0.09	877.631	876.624	[M-H]-1	208425	204202	251028	318513	290122	296334	210787	209335	395579	411423	411349	216154	200681	295627	193050	268281	355499	194631	191290	391375	221487	467915	247312	176774	329331	224924	210055	447352	321128	196054	352305	200292	266805	211207	188166	274512	241197	330902	358477	539328	309693	235883
Sulfatide d41:2_9.19	Sulfatide d41:2	9.19	C47 H89 N O11 S	4.13	875.619	876.627	[M+H]+1	72381.5	74873.3	96311.1	88038.8	93505.1	94020.7	92922	56730.9	84547.9	79772.9	79851.3	60004.6	80059.4	67401.1	84692.9	91752.1	70020.5	73976.6	112405	80456.5	84812.7	57487.1	97236.9	77098.1	116000	84178.2	83877.1	109646	114995	74020.2	99237.6	84995.4	68489.9	128751	95696.3	110689	100546	101149	70307.6	72829.6	71978.7	78512.1
Sulfatide d41:3_26.31	Sulfatide d41:3	26.31	C47 H87 N O11 S	-7.13	873.594	872.586	[M-H]-1	488292	346613	840440	1.44385e+06	979412	950600	391934	364376	1.61139e+06	1.19693e+06	1.09955e+06	534096	328303	782204	772010	911039	934214	587152	734760	1.26469e+06	576247	452220	741214	923755	799690	530792	463433	2.27314e+06	346354	683916	871725	647091	678899	326454	510088	452162	744387	919699	578356	2.3332e+06	551076	952938
Sulfatide d42:0_30.24	Sulfatide d42:0	30.24	C48 H95 N O11 S	-8.32	893.655	892.648	[M-H]-1	1.47865e+06	736888	1.3496e+06	505919	2.33545e+06	1.11154e+06	248335	223906	926918	1.30309e+06	2.57082e+06	1.05444e+06	197016	1.17783e+06	1.28704e+06	2.57004e+06	286507	227979	378010	674694	1.02117e+06	990705	378519	925049	1.21133e+06	1.50705e+06	884498	4.12429e+06	492794	212576	4.87914e+06	957296	241113	1.54298e+06	269916	494373	883458	490165	408735	779508	295350	385257
Sulfatide d42:0_34.61	Sulfatide d42:0	34.61	C48 H95 N O11 S	-1.14	893.662	892.654	[M-H]-1	133356	339706	127149	779699	40532.6	79731.2	197321	366087	104606	467146	54343.4	82894.3	256476	148742	80885	121858	322541	460608	120525	139987	90796.7	98547.8	100668	587263	194827	1.22321e+06	74476	113312	860086	124937	242166	219178	573357	75593.9	163984	326535	131591	103096	125310	237640	208963	230793
Sulfatide d42:0_32.16	Sulfatide d42:0	32.16	C48 H95 N O11 S	0.28	893.663	892.656	[M-H]-1	287910	195473	245391	168574	122799	142904	177562	234686	272474	135153	190554	140055	251798	351873	158218	185232	282891	222984	259331	451750	256937	269145	202245	209328	248073	165620	219703	259511	224695	306042	190846	255813	227075	164830	278049	312551	305019	304724	292213	202405	330104	244774
Sulfatide d42:2_4.95	Sulfatide d42:2	4.95	C48 H91 N O11 S	5.01	889.636	890.642	[M+H]+1	3.99284e+06	2.72269e+06	2.53468e+06	3.26181e+06	2.29674e+06	2.41828e+06	2.82375e+06	2.03468e+06	3.04367e+06	1.34095e+06	2.78856e+06	3.93816e+06	3.0306e+06	3.16142e+06	3.08853e+06	3.55601e+06	2.04467e+06	2.37995e+06	216440	390239	177496	3.77667e+06	248985	217625	234085	2.30886e+06	2.01107e+06	2.8968e+06	2.51984e+06	4.00468e+06	4.41915e+06	1.20195e+06	4.10295e+06	185660	172558	173072	192191	164764	2.46303e+06	2.9199e+06	2.65219e+06	4.19745e+06
Sulfatide d42:3_27.82	Sulfatide d42:3	27.82	C48 H89 N O11 S	0.21	887.616	886.608	[M-H]-1	1.15455e+07	6.9183e+06	8.42403e+06	1.07277e+07	1.19322e+07	1.1673e+07	9.62981e+06	9.07931e+06	1.20515e+07	8.22149e+06	1.16515e+07	1.17933e+07	1.16979e+07	1.16123e+07	8.14079e+06	1.1131e+07	1.13735e+07	9.40399e+06	8.77086e+06	1.24813e+07	1.20823e+07	1.04915e+07	1.20656e+07	9.60928e+06	1.16764e+07	5.89678e+06	1.01032e+07	8.34061e+06	8.21321e+06	1.23741e+07	7.94824e+06	1.13661e+07	1.15014e+07	1.01926e+07	8.61971e+06	8.99812e+06	1.21024e+07	1.14333e+07	1.08983e+07	1.21198e+07	1.16109e+07	1.11412e+07
Sulfatide d42:4_26.98	Sulfatide d42:4	26.98	C48 H87 N O11 S	-0.27	885.6	884.592	[M-H]-1	117234	64509.6	112867	132069	131939	159314	71973.8	69417.9	201681	180623	160320	73597.9	78082.3	116644	88413.1	120424	128507	72554.5	76738.9	224067	109904	103694	84870.6	67831.7	129235	86001	82810.6	269857	93006.4	58754.2	124418	106765	75341.7	78619.6	68595.7	128348	132946	146379	104072	162448	95213.8	82884.1
Sulfatide d42:4_25.97	Sulfatide d42:4	25.97	C48 H87 N O11 S	4.86	885.604	866.592	[M-H-H2O]-1	1.67642e+06	2.54402e+06	3.03553e+06	6.18352e+06	3.39653e+06	2.55507e+06	1.40686e+06	1.47872e+06	4.92278e+06	4.80185e+06	4.35422e+06	1.92557e+06	1.55861e+06	3.44876e+06	2.2976e+06	2.80435e+06	3.4552e+06	2.12449e+06	2.24492e+06	6.21489e+06	2.18504e+06	1.7866e+06	3.36662e+06	1.24681e+06	2.58772e+06	1.95e+06	2.88498e+06	4.36579e+06	1.93729e+06	1.50566e+06	2.90516e+06	1.86464e+06	4.75815e+06	1.5908e+06	1.49719e+06	2.09483e+06	2.71986e+06	3.66201e+06	2.58105e+06	1.00421e+07	2.4928e+06	2.03454e+06
Sulfatide d43:0_33.4	Sulfatide d43:0	33.4	C49 H97 N O11 S	-4.6	907.674	908.681	[M+H]+1	1.14028e+06	1.7065e+06	6.99649e+06	2.11715e+06	1.53032e+06	1.51273e+06	4.52971e+06	1.1242e+06	1.76821e+06	1.69372e+06	1.52526e+06	1.56054e+06	1.20444e+06	1.01394e+06	1.07697e+06	1.36629e+06	1.28962e+06	1.82452e+06	1.71988e+06	1.9151e+06	1.13033e+06	4.48147e+06	1.17197e+06	1.72117e+06	2.25551e+06	3.34535e+06	1.21931e+06	2.24516e+06	1.97919e+06	1.12444e+06	3.6234e+06	1.10762e+06	1.43935e+06	1.22933e+06	1.14997e+06	1.54438e+06	1.93342e+06	1.55502e+06	1.44127e+06	7.33995e+06	1.08379e+06	8.05196e+06
Sulfatide d43:1_32.42	Sulfatide d43:1	32.42	C49 H95 N O11 S	-0.17	905.662	904.655	[M-H]-1	163654	182968	230013	165754	132782	202900	185954	168848	214487	206531	193557	139957	191761	183360	162147	199670	158568	179095	221738	290027	175642	186059	155551	184399	205317	153373	170407	294235	229361	166844	181723	198829	216651	161899	168228	166344	154863	189136	229328	264455	167453	207686
Sulfatide d43:1_31.12	Sulfatide d43:1	31.12	C49 H95 N O11 S	0.84	905.663	904.656	[M-H]-1	136652	133818	132039	156403	235521	157471	131678	135188	191494	193344	194915	144396	133336	176445	109682	176476	168033	137169	111717	229296	138833	122224	129917	133268	186224	156361	151404	198016	218179	123194	209149	123318	154682	159330	153617	150357	139485	154747	161925	195404	170065	139204
Sulfatide d43:2_33.73	Sulfatide d43:2	33.73	C49 H93 N O11 S	8.97	903.655	902.648	[M-H]-1	325453	341468	561460	222636	118403	148799	299060	221159	246484	243760	144455	242999	381524	271109	226600	198491	335175	344389	369168	349058	252665	326575	232524	282282	238819	241836	218010	337585	323960	318841	248515	318772	209251	325617	268931	337634	250738	201086	346401	289863	327644	355689
Sulfatide d43:3_9.97	Sulfatide d43:3	9.97	C49 H91 N O11 S	3.71	901.635	902.642	[M+H]+1	68150.2	77801.3	71864.5	62460.6	121669	87801.9	122106	72541.7	87062.2	107148	102249	66915	72315.7	66243.5	77425.1	87074.1	71749.1	68305.2	356966	163602	175198	93910.6	327516	265398	247229	93538.5	86438.3	82717.2	82942.5	68483.4	84681.3	81762.8	82151	294709	311976	248273	326980	240012	92256.5	84061.4	71783.2	79213.6
Sulfatide d43:3_12.53	Sulfatide d43:3	12.53	C49 H91 N O11 S	7.64	901.638	902.645	[M+H]+1	2.04734e+06	2.94191e+06	3.98551e+06	1.09204e+06	2.89401e+06	3.48162e+06	2.41176e+06	3.00531e+06	4.93277e+06	3.42502e+06	3.60414e+06	2.84779e+06	3.06841e+06	2.96794e+06	3.14102e+06	4.39692e+06	3.07187e+06	3.05634e+06	259275	214857	283440	3.58808e+06	289872	234689	296868	2.2452e+06	2.99286e+06	4.09011e+06	6.30354e+06	3.55336e+06	4.07627e+06	3.16045e+06	2.61602e+06	253995	275515	240755	320452	207276	3.40985e+06	3.45882e+06	4.06691e+06	3.85854e+06
Sulfatide d43:4_28.28	Sulfatide d43:4	28.28	C49 H89 N O11 S	-0.5	899.615	898.608	[M-H]-1	440836	403757	657930	1.02073e+06	427296	535640	300322	382125	1.00642e+06	677436	748947	444272	383750	753020	1.14173e+06	569020	916361	461982	459013	835842	438219	484469	614453	317749	637677	430521	353090	611033	425573	414102	499987	298986	487405	267309	321921	383508	560250	806322	645863	1.02724e+06	517159	487587
Sulfatide d43:4_29.14	Sulfatide d43:4	29.14	C49 H89 N O11 S	9.85	899.624	880.608	[M-H-H2O]-1	435964	126669	206446	117155	735762	179539	216534	84003.9	335350	387246	422876	100031	211774	123582	296760	491489	197616	256804	108210	401369	138246	243604	99285	99138.8	209690	104910	95019.6	1.28874e+06	172040	129292	154938	181547	111105	108240	104971	338641	228433	328923	166481	209908	124269	241915
Sulfatide d44:0_7.3	Sulfatide d44:0	7.3	C50 H99 N O11 S	-5.95	921.688	922.696	[M+H]+1	918242	908107	1.89958e+06	1.69141e+06	1.33225e+06	1.57038e+06	630997	1.55306e+06	1.87794e+06	1.08775e+06	1.76087e+06	1.47327e+06	1.16095e+06	1.70517e+06	1.39833e+06	1.58287e+06	1.25227e+06	1.07957e+06	574042	376026	394474	1.46379e+06	630895	358379	464066	812426	1.46888e+06	1.64467e+06	2.72821e+06	1.87386e+06	1.69024e+06	1.05236e+06	1.71326e+06	457352	452048	498386	433446	433643	1.30699e+06	1.31486e+06	1.46466e+06	1.20535e+06
Sulfatide d44:1_34.67	Sulfatide d44:1	34.67	C50 H97 N O11 S	1.38	919.679	918.67	[M-H]-1	50511.4	88457.9	93865.5	135215	23054.7	37141.1	75993.5	216157	68655.3	216416	34577.2	43008.6	63195.5	59037.2	66191	52690	117777	242224	91446.2	58548.8	45527.4	54362.4	63577	261028	80086.7	661698	44987.6	59763.5	299339	53980.1	75983	78593.2	193886	46123.9	46942.5	170929	67948.3	54402.4	68130.7	120526	109200	101816
Sulfatide d44:2_32.09	Sulfatide d44:2	32.09	C50 H95 N O11 S	-0.04	917.663	916.655	[M-H]-1	365250	247982	287574	204480	137459	180597	225260	287766	345668	164767	241742	172981	319439	413347	200720	234991	358884	266490	290450	551994	325957	323424	256573	265560	308704	210110	278721	327590	278024	388021	245177	324531	288074	209108	352741	357819	386955	386582	370709	256776	418779	310527
Sulfatide d44:3_31.48	Sulfatide d44:3	31.48	C50 H93 N O11 S	-9.1	915.639	916.646	[M+H]+1	504259	469196	646268	622281	1.76197e+06	1.44104e+06	723844	505389	1.1264e+06	994374	1.8103e+06	449760	427066	656676	766048	1.07074e+06	518502	620442	348538	1.05228e+06	476396	392612	402134	549239	738849	792511	629268	1.87157e+06	1.32023e+06	395257	1.61313e+06	400359	685035	812552	499235	536627	568339	696214	703622	1.55051e+06	563633	418878
Sulfatide d45:0_35.08	Sulfatide d45:0	35.08	C51 H101 N O11 S	-4.91	935.705	936.712	[M+H]+1	3.59889e+06	4.51816e+06	1.80914e+07	7.54785e+06	754285	2.78052e+06	1.75968e+07	1.4678e+06	8.3844e+06	1.86473e+06	1.29547e+06	1.74144e+07	4.99903e+06	3.11744e+06	3.23952e+06	1.6036e+06	6.72077e+06	6.59843e+06	2.54387e+06	2.85639e+06	2.01288e+06	5.52964e+06	4.61259e+06	2.36165e+06	5.80286e+06	8.83434e+06	1.70063e+06	4.82738e+06	2.43336e+06	4.24786e+06	6.1119e+06	2.02491e+06	2.02287e+06	3.32467e+06	1.45422e+06	3.09692e+06	2.61242e+06	3.31404e+06	3.06848e+06	3.03284e+07	2.93407e+06	1.05975e+07
Sulfatide d46:0_37.39	Sulfatide d46:0	37.39	C52 H103 N O11 S	-4.22	949.721	950.728	[M+H]+1	1.73035e+08	1.26001e+08	4.25128e+08	9.2819e+07	4.69887e+07	1.61049e+08	2.92737e+08	3.11575e+08	1.76767e+08	1.22213e+08	1.27532e+08	2.40984e+08	2.99634e+08	1.82133e+08	2.24389e+08	8.27749e+07	1.55702e+08	1.60086e+08	1.44643e+08	1.07814e+08	1.06147e+08	3.30019e+08	1.9426e+08	2.52088e+08	2.59552e+08	2.19077e+08	1.94304e+08	1.47359e+08	2.3859e+08	9.62744e+07	1.97337e+08	6.72953e+07	8.63326e+07	5.2208e+08	1.50557e+08	1.53106e+08	1.39359e+08	3.41444e+08	1.55574e+08	1.56293e+08	2.29012e+08	1.65009e+08
Sulfatide d46:0_36.71	Sulfatide d46:0	36.71	C52 H103 N O11 S	-3.25	949.722	950.729	[M+H]+1	4.35824e+06	2.21409e+07	5.46442e+06	2.95807e+06	1.00301e+06	3.53532e+06	2.43011e+07	1.69765e+07	5.91294e+06	4.06915e+06	1.31486e+06	2.01063e+07	1.90574e+07	4.17981e+06	5.77803e+06	9.91172e+06	7.4303e+06	7.40792e+06	3.50956e+06	3.99834e+06	7.45521e+06	1.39089e+07	1.32622e+07	1.15181e+07	1.99816e+07	1.33166e+07	7.45106e+06	2.30256e+07	4.49228e+06	2.00928e+06	1.09995e+07	1.91852e+06	4.73627e+06	1.04396e+07	5.26005e+06	4.23842e+06	3.61898e+06	7.75003e+06	4.91899e+06	3.70911e+07	1.10535e+07	1.04769e+07
Sulfatide d46:0_29.02	Sulfatide d46:0	29.02	C52 H103 N O11 S	-0.27	949.725	948.718	[M-H]-1	463936	295573	793757	351984	327089	549303	400391	265863	654199	449283	539396	254887	413843	435009	330928	412665	510015	315561	371797	625225	474487	730133	287188	278593	315863	298709	302926	447605	531250	224065	1.17159e+06	276122	339469	349231	287573	718372	552517	583963	493214	430923	499240	888503
Sulfatide d46:2_31.24	Sulfatide d46:2	31.24	C52 H99 N O11 S	-3.25	945.691	944.684	[M-H]-1	112336	135718	141494	175356	291775	220675	139841	166260	224739	266888	307679	172849	130375	196140	143422	213995	150900	126528	111455	251978	137923	117466	133255	110354	213534	159609	174400	207098	292098	115111	247381	134049	184971	189006	135000	113570	114840	182588	186646	254845	158549	155164
Sulfatide d46:2_35.22	Sulfatide d46:2	35.22	C52 H99 N O11 S	-3.21	945.691	946.698	[M+H]+1	2.05048e+06	7.20592e+06	4.4589e+06	3.13432e+06	986156	1.91311e+06	1.45262e+07	7.02261e+06	3.13519e+06	2.13703e+06	1.85844e+06	4.38142e+06	4.89266e+06	2.30917e+06	1.88836e+06	2.00444e+06	2.92407e+06	5.67764e+06	2.50403e+06	2.95554e+06	2.38542e+06	6.28786e+06	1.9064e+06	6.25714e+06	1.44918e+07	3.81911e+06	7.66756e+06	1.54475e+07	3.19082e+06	2.73395e+06	2.60694e+06	2.68694e+06	2.33893e+06	4.7296e+06	2.02919e+06	3.53593e+06	3.23603e+06	9.32372e+06	3.53303e+06	1.66047e+07	4.11277e+06	2.53068e+06
Sulfatide d46:4_32.59	Sulfatide d46:4	32.59	C52 H95 N O11 S	5.9	941.668	942.675	[M+H]+1	282752	261864	387618	458245	381146	422300	359602	259799	340442	524859	465328	218421	218807	199507	232080	406774	254074	277424	208925	472537	204775	264448	181696	248757	327058	304145	195813	761833	428540	188174	455434	230852	279148	236586	227529	296047	273122	322151	228837	633244	225190	284069
Sulfatide d47:0_35.76	Sulfatide d47:0	35.76	C53 H105 N O11 S	9.43	963.75	964.757	[M+H]+1	1.6612e+07	4.24658e+07	5.17092e+07	9.63919e+06	3.84986e+06	2.43547e+07	1.74384e+08	5.63706e+07	2.4792e+07	1.22415e+07	7.73233e+06	4.14936e+07	7.76455e+07	1.24295e+07	2.8557e+07	2.13889e+07	1.7392e+07	7.02081e+07	8.8528e+06	5.66287e+06	1.60644e+07	1.00472e+08	2.12386e+07	6.09528e+07	1.33624e+08	5.56249e+07	6.17524e+07	5.96037e+07	2.46496e+07	6.2775e+06	3.52009e+07	1.2126e+07	2.28323e+07	1.23568e+08	1.0483e+07	1.56491e+07	8.86841e+06	1.52518e+08	1.68381e+07	6.18344e+07	6.18766e+07	8.93108e+06
Sulfatide d47:4_33.64	Sulfatide d47:4	33.64	C53 H97 N O11 S	-7.12	955.671	954.664	[M-H]-1	544148	301608	505030	260904	123113	168023	480134	208999	246674	353866	146598	958830	379620	276783	401518	157910	284650	301731	318493	319471	248197	313102	240469	248399	499385	222608	212518	315227	318644	285824	223554	404054	218624	297931	280171	277850	257051	185896	699797	247458	376681	328843
Sulfatide d47:4_2.52	Sulfatide d47:4	2.52	C53 H97 N O11 S	7.24	955.685	478.85	[M+2H]+2	3.16938e+07	4.11229e+07	3.95752e+07	3.08201e+07	3.17091e+07	2.60729e+07	3.07102e+07	2.85875e+07	4.69921e+07	2.74641e+07	3.7461e+07	2.92744e+07	3.49647e+07	2.1412e+07	2.46833e+07	2.97196e+07	4.03058e+07	3.24277e+07	196763	185027	167544	3.56216e+07	228170	198420	190458	2.7806e+07	3.21115e+07	3.03442e+07	4.35435e+07	3.66084e+07	3.95209e+07	3.30264e+07	3.46207e+07	214365	159386	136860	227087	144640	2.66913e+07	4.01995e+07	4.01117e+07	4.40096e+07
Sulfatide d47:4_29.48	Sulfatide d47:4	29.48	C53 H97 N O11 S	8.09	955.686	956.693	[M+H]+1	456144	662901	674734	977592	1.03394e+06	628861	539738	401378	1.30017e+06	1.23716e+06	948581	364864	479254	449670	685654	694382	688530	571790	421948	834966	430793	343152	382093	488039	684133	910738	355392	1.34324e+06	725150	388520	863764	345939	427701	1.00762e+06	463224	510061	532782	540907	524586	1.18127e+06	612573	457469
Sulfatide d48:0_33.42	Sulfatide d48:0	33.42	C54 H107 N O11 S	-0.03	977.756	978.764	[M+H]+1	1.03444e+06	1.20001e+06	2.28766e+06	1.92064e+06	1.42409e+06	1.37232e+06	1.88352e+06	1.19874e+06	1.99615e+06	1.53651e+06	1.40798e+06	961530	1.75644e+06	1.10484e+06	1.00249e+06	1.54912e+06	1.21768e+06	1.80333e+06	964215	1.73734e+06	1.09709e+06	1.65262e+06	1.01591e+06	1.56142e+06	1.49515e+06	1.24632e+06	1.10613e+06	2.65299e+06	1.79548e+06	1.21469e+06	1.25063e+06	1.22612e+06	1.30575e+06	1.11523e+06	1.04323e+06	1.40103e+06	1.75396e+06	1.24003e+06	1.40114e+06	2.62946e+06	1.48788e+06	1.11996e+06
Sulfatide d48:3_35.73	Sulfatide d48:3	35.73	C54 H101 N O11 S	-3.15	971.706	972.714	[M+H]+1	1.29389e+06	5.26779e+06	6.75277e+06	1.1739e+06	916563	3.81224e+06	2.5461e+07	8.70917e+06	2.26597e+06	1.04735e+06	1.55375e+06	4.30239e+06	1.17092e+07	1.87576e+06	4.95993e+06	2.5627e+06	2.50228e+06	1.04855e+07	2.13028e+06	1.10445e+06	1.24864e+06	1.35221e+07	1.30367e+06	9.48832e+06	1.82559e+07	7.3146e+06	9.3554e+06	8.60887e+06	1.84052e+06	994700	4.07043e+06	1.18214e+06	2.34216e+06	6.42642e+06	980517	1.17075e+06	2.21032e+06	1.95325e+07	1.93018e+06	7.00556e+06	7.03124e+06	2.92063e+06
Sulfatide d48:4_34.77	Sulfatide d48:4	34.77	C54 H99 N O11 S	-2.69	969.691	970.699	[M+H]+1	293757	319989	514498	798644	209197	260406	768997	291708	422398	340461	267496	480183	400482	248795	317902	332111	444600	685875	315571	316764	317003	489964	318827	356746	453821	738748	298719	454401	344183	262798	400845	321892	366379	415609	247072	333278	445233	315816	325504	519946	348064	442032
Sulfatide d48:4_2.92	Sulfatide d48:4	2.92	C54 H99 N O11 S	7.29	969.701	485.858	[M+2H]+2	7.82322e+07	1.13189e+08	1.32877e+08	1.59919e+08	1.33845e+08	7.7238e+07	7.95762e+07	8.32781e+07	1.1799e+08	1.06476e+08	1.1919e+08	1.18851e+08	1.04783e+08	1.16247e+08	1.01592e+08	1.15085e+08	9.86459e+07	8.69761e+07	112318	137520	122145	1.00193e+08	144223	124106	115116	8.42509e+07	1.03938e+08	1.10474e+08	1.2709e+08	1.04035e+08	1.39165e+08	9.53612e+07	1.12641e+08	103989	94493.8	82133.5	107039	90178.2	9.93358e+07	8.89969e+07	1.56167e+08	2.09246e+08
Sulfatide d50:0_35.55	Sulfatide d50:0	35.55	C56 H111 N O11 S	-8.79	1005.78	1004.77	[M-H]-1	61326.4	94387.9	121223	171486	96132	122856	64352.6	115651	117728	160703	110403	133027	73313.7	93814	93073.5	107112	84432.2	213470	112541	56961	88287.9	76956.6	67771.1	44159.6	138949	123530	82528.8	170349	116335	65609.7	107980	71553.5	95477.1	41771.5	77143.9	133297	156411	118043	97546.5	98770.8	77487.5	70031.1
Sulfatide d50:3_37.49	Sulfatide d50:3	37.49	C56 H105 N O11 S	-1.71	999.739	1000.75	[M+H]+1	1.12978e+06	1.60005e+06	1.45331e+06	1.33501e+06	585035	2.18711e+06	4.26469e+06	4.92696e+06	1.66614e+06	1.22632e+06	641865	1.7776e+06	6.58492e+06	1.31192e+06	2.3729e+06	1.4349e+06	1.94971e+06	3.75957e+06	1.59019e+06	1.58671e+06	1.86256e+06	1.15251e+07	2.05184e+06	1.92097e+06	1.019e+07	2.51492e+06	3.11054e+06	2.27826e+06	1.77271e+06	1.89632e+06	2.34562e+06	930115	1.06355e+06	8.76085e+06	1.56238e+06	1.19743e+06	1.28314e+06	9.16781e+06	3.47427e+06	2.77577e+06	4.55566e+06	1.78868e+06
Sulfatide d50:4_33.43	Sulfatide d50:4	33.43	C56 H103 N O11 S	6.39	997.732	998.739	[M+H]+1	1.06235e+06	1.23239e+06	2.34938e+06	2.46076e+06	1.46251e+06	1.40934e+06	1.93434e+06	1.23109e+06	2.05001e+06	1.57796e+06	1.44597e+06	1.1689e+06	1.80383e+06	1.13465e+06	1.02954e+06	1.59091e+06	1.25054e+06	1.85199e+06	990230	1.89466e+06	1.12669e+06	1.69721e+06	1.04332e+06	1.60354e+06	1.53549e+06	1.6668e+06	1.13598e+06	2.72457e+06	1.84392e+06	1.24747e+06	1.28438e+06	1.2592e+06	1.34098e+06	1.14532e+06	1.07138e+06	1.43883e+06	1.80128e+06	1.90362e+06	1.43895e+06	2.7004e+06	1.52802e+06	1.15017e+06
Sulfatide d50:4_4.33	Sulfatide d50:4	4.33	C56 H103 N O11 S	7.28	997.732	499.873	[M+2H]+2	1.01215e+08	7.67829e+07	1.42974e+08	1.2378e+08	1.14033e+08	1.16498e+08	8.63324e+07	1.10894e+08	1.53823e+08	1.04871e+08	1.39037e+08	1.0855e+08	1.32529e+08	1.27017e+08	9.87614e+07	1.17762e+08	5.81583e+07	9.50587e+07	899786	1.87832e+06	900918	1.21941e+08	595671	976311	709422	9.01984e+07	1.05005e+08	1.24029e+08	1.48096e+08	1.27639e+08	1.27151e+08	1.01799e+08	9.51524e+07	972977	712841	732514	705153	668491	1.00158e+08	1.2177e+08	1.38089e+08	1.39547e+08
Sulfatide d50:4_9.66	Sulfatide d50:4	9.66	C56 H103 N O11 S	7.96	997.733	499.874	[M+2H]+2	193985	212008	406261	284008	1.00755e+06	674129	558820	232785	400419	993812	795210	183744	245504	313953	395414	669981	387724	192517	386980	702701	391113	3.14919e+06	843582	228287	352174	376209	271946	946263	617266	221002	337206	156448	135252	389064	203670	237305	235013	321815	434257	432521	209041	191791
Sulfatide t34:1_24.82	Sulfatide t34:1	24.82	C40 H77 N O12 S	-1.12	795.516	796.523	[M+H]+1	658720	952833	1.57259e+06	996676	2.33318e+06	1.22618e+06	401451	1.63543e+06	2.98285e+06	2.00273e+06	2.10477e+06	598730	667351	822500	941220	1.63709e+06	748079	912877	477378	1.73203e+06	725884	617029	461395	1.05021e+06	2.28331e+06	1.72573e+06	770600	1.97687e+06	1.28088e+06	522676	1.43645e+06	940177	620613	1.07281e+06	646377	825562	650291	867555	951818	1.03132e+06	1.15308e+06	698134
Sulfatide t34:2_20.43	Sulfatide t34:2	20.43	C40 H75 N O12 S	0.93	793.502	792.494	[M-H]-1	222321	288637	111438	69875.9	595917	305036	139531	184248	214936	409249	791651	59342	99182.6	229624	112055	416187	180114	182070	38629.1	384942	225259	67330.4	91413.6	229275	206357	151131	162301	718694	381103	174999	199079	267044	92939.9	1.18958e+06	102562	222865	135979	156860	159405	360206	168308	65518.1
Sulfatide t36:1_28.85	Sulfatide t36:1	28.85	C42 H81 N O12 S	-2.18	823.546	822.539	[M-H]-1	203263	152057	201103	212694	215474	274642	192693	158269	311628	253753	271816	166415	185631	250863	162294	192043	250546	146298	187711	332305	321599	235956	197579	139313	201539	153591	168676	245577	221007	135161	190217	147599	195405	170739	140041	263836	275485	291250	263683	263695	243156	203107
Sulfatide t36:1_25.08	Sulfatide t36:1	25.08	C42 H81 N O12 S	-0.77	823.547	822.54	[M-H]-1	4.40696e+06	3.72014e+06	5.70741e+06	7.19281e+06	6.54352e+06	6.72654e+06	2.64062e+06	3.17268e+06	1.03739e+07	7.96659e+06	8.9342e+06	7.70541e+06	3.56021e+06	7.44889e+06	6.18399e+06	5.13023e+06	7.20886e+06	4.34341e+06	5.82554e+06	9.24923e+06	5.40267e+06	5.05655e+06	7.53721e+06	4.19943e+06	5.19118e+06	4.60015e+06	4.31584e+06	8.56795e+06	5.17642e+06	2.32723e+06	6.51232e+06	2.91459e+06	5.28995e+06	6.57132e+06	3.46892e+06	6.49027e+06	5.41846e+06	8.00811e+06	5.91534e+06	7.50037e+06	4.97111e+06	6.83979e+06
Sulfatide t36:2_28.98	Sulfatide t36:2	28.98	C42 H79 N O12 S	-1.22	821.531	822.539	[M+H]+1	1.16246e+06	1.01874e+06	1.2388e+06	810845	539018	1.27588e+06	933425	441080	882302	1.7786e+06	660435	452420	689344	486337	467737	674069	675614	1.34173e+06	486865	608372	1.49666e+06	737040	402013	442741	588243	877504	830365	930575	738100	401586	712572	694959	710032	1.16206e+06	1.15804e+06	804502	1.04405e+06	710992	794326	882019	1.31325e+06	690267
Sulfatide t36:2_26.15	Sulfatide t36:2	26.15	C42 H79 N O12 S	1.42	821.533	822.541	[M+H]+1	4.10131e+07	1.06395e+08	1.93845e+08	3.4397e+08	1.81423e+08	8.84866e+07	4.1188e+07	7.06732e+07	2.4557e+08	2.77079e+08	2.2817e+08	2.94325e+07	5.40641e+07	9.67628e+07	2.15581e+08	1.84633e+08	1.64857e+08	1.50733e+08	9.19208e+07	1.20893e+08	5.25307e+07	2.64075e+07	7.33846e+07	6.88677e+07	9.18281e+07	1.6424e+08	4.34511e+07	2.89992e+08	5.53719e+07	9.21592e+07	1.44024e+08	7.51155e+07	8.76121e+07	2.47946e+07	5.05049e+07	3.88385e+07	9.75858e+07	9.83076e+07	5.89162e+07	2.27104e+08	5.74995e+07	4.60706e+07
Sulfatide t37:0_27.05	Sulfatide t37:0	27.05	C43 H85 N O12 S	0.28	839.579	838.572	[M-H]-1	231977	271079	409564	683616	435823	290267	234722	201381	683850	569690	555695	281861	276154	527847	340919	375133	581480	274911	303299	779157	290996	282649	368974	214524	329576	414868	248802	640611	370155	247096	568583	272229	300549	330944	246309	369319	353167	464675	396140	620887	403341	352259
Sulfatide t37:1_21.36	Sulfatide t37:1	21.36	C43 H83 N O12 S	1.47	837.565	836.558	[M-H]-1	122019	155597	92500.6	126225	117518	77591.1	101268	131161	97840.8	102234	99255.2	90630.7	138835	53118.3	129541	143506	95222.1	129084	124605	87223	112075	197482	69859.7	175377	168283	195089	103617	128541	155845	125492	99904.5	102658	67302.7	160101	162861	135905	123573	94605.9	37578.9	97011	115624	108307
Sulfatide t38:0_31.12	Sulfatide t38:0	31.12	C44 H87 N O12 S	0.28	853.595	854.602	[M+H]+1	280089	428489	625361	889763	455317	417655	562766	293941	435349	524115	463926	446293	337983	314029	293163	386629	443600	455784	432630	380268	303874	409920	314067	317301	469052	595746	294801	587785	470690	358874	561391	320291	316939	434486	337689	432893	486515	383065	311329	649750	401788	425033
Sulfatide t38:1_27.22	Sulfatide t38:1	27.22	C44 H85 N O12 S	-0.66	851.579	850.571	[M-H]-1	986976	1.20109e+06	1.50245e+06	3.29585e+06	1.78e+06	1.75419e+06	984137	809940	2.89344e+06	2.32759e+06	2.24431e+06	1.44949e+06	1.0871e+06	2.2844e+06	1.48616e+06	1.45178e+06	2.5048e+06	1.12112e+06	1.30347e+06	3.3567e+06	1.40425e+06	1.06836e+06	1.69272e+06	943747	1.67145e+06	1.47135e+06	1.05164e+06	2.21271e+06	1.48288e+06	981487	1.92292e+06	1.27291e+06	1.46238e+06	1.55495e+06	1.12011e+06	1.16723e+06	1.43014e+06	2.35779e+06	1.65423e+06	2.84408e+06	1.6647e+06	1.52618e+06
Sulfatide t38:2_25.21	Sulfatide t38:2	25.21	C44 H83 N O12 S	-1.64	849.562	848.555	[M-H]-1	3.54206e+06	3.42161e+06	4.72344e+06	5.5995e+06	4.86476e+06	6.35722e+06	2.69325e+06	3.14022e+06	8.5933e+06	6.9507e+06	8.22139e+06	6.9553e+06	3.07073e+06	6.81599e+06	5.1889e+06	4.68177e+06	5.70686e+06	3.4021e+06	4.89826e+06	8.76177e+06	4.65248e+06	3.75123e+06	6.31689e+06	3.38035e+06	5.05048e+06	3.92482e+06	3.87491e+06	6.80016e+06	4.56019e+06	2.48568e+06	5.87134e+06	3.17571e+06	4.47489e+06	5.606e+06	3.51575e+06	5.65708e+06	4.57525e+06	6.76648e+06	4.89375e+06	8.32193e+06	4.96631e+06	5.05077e+06
Sulfatide t38:3_26.29	Sulfatide t38:3	26.29	C44 H81 N O12 S	1.29	847.549	848.556	[M+H]+1	1.44751e+06	6.118e+06	9.64804e+06	9.96118e+06	1.13984e+07	4.26881e+06	2.46371e+06	4.20106e+06	1.19316e+07	2.24423e+07	9.40999e+06	1.53553e+06	2.53829e+06	4.49007e+06	2.9326e+06	1.74653e+07	1.34165e+07	5.57845e+06	1.81175e+06	7.04248e+06	2.96764e+06	738133	4.54448e+06	5.29768e+06	6.65816e+06	7.99548e+06	2.71196e+06	1.97947e+07	997636	6.20336e+06	8.43633e+06	4.61419e+06	2.38788e+06	1.29455e+06	2.81636e+06	1.19024e+06	5.17878e+06	3.14407e+06	2.98635e+06	2.33986e+07	2.4046e+06	3.04067e+06
Sulfatide t39:0_30.32	Sulfatide t39:0	30.32	C45 H89 N O12 S	-5.87	867.605	868.613	[M+H]+1	666064	662289	675421	662576	852062	905454	976938	748537	1.28426e+06	883226	735431	724930	658439	778089	598272	647102	568879	570600	600853	717192	717391	782010	720830	853877	893948	848122	665576	875538	874404	796794	828475	712786	738501	762712	636098	775460	839181	810762	750402	825484	627588	594371
Sulfatide t39:0_32.16	Sulfatide t39:0	32.16	C45 H89 N O12 S	0.04	867.611	868.618	[M+H]+1	1.56353e+06	794535	3.14092e+06	834842	636399	1.18381e+06	895734	1.13826e+06	2.95144e+06	1.18072e+06	1.51089e+06	1.1067e+06	1.01679e+06	2.6728e+06	1.02309e+06	1.7855e+06	2.81977e+06	2.43165e+06	1.12741e+06	4.88889e+06	1.91588e+06	1.89455e+06	763528	1.32507e+06	2.09547e+06	1.82572e+06	1.39836e+06	4.49026e+06	3.31388e+06	2.14422e+06	2.44163e+06	1.28441e+06	811491	1.54549e+06	1.85629e+06	1.85273e+06	3.69886e+06	2.62471e+06	1.77943e+06	1.49018e+06	3.15334e+06	1.01046e+06
Sulfatide t40:0_30.01	Sulfatide t40:0	30.01	C46 H91 N O12 S	0.19	881.626	880.619	[M-H]-1	152849	149605	175070	208330	121826	146438	166133	168242	207944	146754	165051	188427	158315	198122	127451	149010	204379	177574	184087	194593	169463	181027	222911	147024	209719	195257	158439	146910	210042	160502	188345	190520	184184	176127	145400	192116	168665	200959	203305	204873	185570	175158
Sulfatide t40:0_32.16	Sulfatide t40:0	32.16	C46 H91 N O12 S	1.03	881.627	880.62	[M-H]-1	3.06388e+06	1.7132e+06	3.9561e+06	1.89509e+06	972583	1.59541e+06	1.77504e+06	2.20287e+06	4.25017e+06	1.80812e+06	2.63594e+06	778536	2.65398e+06	3.14593e+06	1.37385e+06	2.26747e+06	3.20734e+06	3.53578e+06	2.13367e+06	6.94319e+06	3.12164e+06	2.7246e+06	1.80661e+06	2.3937e+06	3.05165e+06	1.91964e+06	1.76288e+06	5.46948e+06	4.0428e+06	3.17462e+06	3.46791e+06	2.31201e+06	1.46207e+06	1.97626e+06	2.7081e+06	3.85014e+06	4.71304e+06	3.94182e+06	2.54792e+06	2.18598e+06	3.30655e+06	2.17982e+06
[truncated: 837 more rows]
[truncated: 98 more columns]
