# Supplementary material for: Comprehensive profiling of serum glycosphingolipids to discover the diagnostic biomarkers of lung cancer and uncover the variation of glycosphingolipid networks in different lung cancer subtypes
Source: Royal Society of Chemistry journal article supplement (doi:10.1039/d4ay01685h), 2024-01-01
Supplement: d4ay01685h5.xlsx [file d4ay01685h5.xlsx]

## Sheet: Lung cancer vs HCs
567 differential glycosphingolipids（FDR<0.5; FC>2）between lung cancer patients and HCs								134 differential glycosphingolipids with AUC>0.85
Name	VIP	p.value	FDR	Fold Change	log2(FC)			Name	AUC
Cer d22:1_2.43	1.81754	4.3926e-39	7.5069e-36	6.9214	2.7911			Cer d22:1_2.43	0.99158
GD1 d42:3_15.16	1.81832	3.0465e-32	2.6032e-29	0.05765	-4.1165			Gg4 d31:2_9.8	0.98948
GM1 t46:4_8.48	1.80709	6.6704e-32	3.7999e-29	0.032085	-4.962			GA2 d31:3_6.65	0.98668
GM1 t42:4_11.21	1.79656	3.5899e-31	1.5338e-28	0.076462	-3.7091			GD2 t41:3_13.07	0.98597
GT1 d39:0_15.57	1.75454	2.2627e-30	7.7339e-28	0.14383	-2.7976			GM1 d40:4_11.17	0.98492
GM1 d37:5_7.11	1.76762	3.5785e-30	1.0193e-27	0.12199	-3.0352			GD1 d43:3_10.04	0.98317
GM1 t31:3_22.38	1.72201	1.1954e-29	2.9184e-27	0.15117	-2.7257			GM1 t42:4_11.21	0.98264
Cer t36:3_22.36	1.71875	1.771e-29	3.7832e-27	0.15175	-2.7203			GD1 d42:3_15.16	0.98247
GD1 t32:6_22.39	1.71699	3.6161e-29	6.8666e-27	0.15022	-2.7349			GD1 t42:2_12.11	0.98142
GD2 t41:3_13.07	1.76206	1.3299e-28	2.2728e-26	0.062307	-4.0045			Gg4 d30:3_9.84	0.98142
GD1 t42:2_12.11	1.70875	7.5211e-28	1.1685e-25	0.18836	-2.4085			GM1 d37:5_7.11	0.98142
GM1 d40:4_11.17	1.74909	1.743e-27	2.4824e-25	0.086446	-3.5321			GM3 d31:5_12.89	0.98001
FGM1 t44:4_10.86	1.72381	1.1903e-26	1.5647e-24	0.057045	-4.1318			GM1 t32:0_11.34	0.97896
FGM1 d42:3_10.95	1.71833	3.089e-26	3.7708e-24	0.075255	-3.7321			FGM1 t32:1_13.33	0.97861
GD3 t38:4_11.34	1.69513	4.0466e-26	4.6105e-24	0.23115	-2.1131			GT2 t39:2_20.18	0.97791
NAP d28:5_22.2	1.63171	5.6172e-26	5.9999e-24	0.17807	-2.4895			HexCer d45:6_13.14	0.97703
GT3 d38:2_15.26	1.7233	1.329e-25	1.336e-23	0.084655	-3.5623			GT3 d38:2_15.26	0.97546
GD1 d43:3_10.04	1.70174	1.5858e-25	1.5056e-23	0.089529	-3.4815			Sulfatide d43:3_9.97	0.97528
GA2 d31:3_6.65	1.70572	3.7115e-25	3.3384e-23	0.10447	-3.2588			GM1 t46:4_8.48	0.97283
HexCer d32:2_22.43	1.65383	5.7283e-25	4.8949e-23	0.17212	-2.5385			GM3 t30:4_9.44	0.97177
Cer d32:1_22.44	1.64075	1.4899e-24	1.1574e-22	0.17726	-2.496			FGM1 d42:3_10.95	0.97037
GD2 d45:1_8.3	1.69079	1.4333e-24	1.1574e-22	0.097255	-3.3621			LacCer d37:0_17.77	0.96897
FGM1 t48:3_8.16	1.68652	2.5271e-24	1.8777e-22	0.065517	-3.932			FGM1 t44:4_10.86	0.96809
GD3 t41:4_11.45	1.69543	3.5169e-24	2.3117e-22	0.093194	-3.4236			GD3 t41:4_11.45	0.96774
Gg4 d30:3_9.84	1.68099	3.3897e-24	2.3117e-22	0.16188	-2.627			GT2 d37:2_20.67	0.96651
Sulfatide d43:3_9.97	1.65843	3.3348e-24	2.3117e-22	0.25598	-1.9659			GD1 d47:2_10.6	0.96529
GT2 t39:2_20.18	1.68741	5.2052e-24	3.2947e-22	0.11637	-3.1032			GM2 d36:5_11.79	0.96178
Cer1P t33:0_22.43	1.61582	1.3961e-23	8.521e-22	0.20031	-2.3197			GM1 t38:5_13.53	0.96108
FGM1 t32:1_13.33	1.67751	2.0608e-23	1.2144e-21	0.12213	-3.0335			GT1 d39:0_15.57	0.95898
GM1 t32:0_11.34	1.676	4.2768e-23	2.4363e-21	0.12202	-3.0348			FGM1 t48:3_8.16	0.95827
GT2 d37:2_20.67	1.65526	5.3542e-23	2.9517e-21	0.10922	-3.1947			GM1 d36:5_13.57	0.9574
GD1 d50:6_11.96	1.64885	6.2575e-23	3.3419e-21	0.093052	-3.4258			GM1 t31:3_22.38	0.95722
GD2 t47:1_8.18	1.66789	8.1578e-23	4.2247e-21	0.094217	-3.4079			NAP d28:5_15.34	0.95722
GM1 d36:5_13.57	1.65065	7.7729e-22	3.907e-20	0.17512	-2.5135			Cer t36:3_22.36	0.95617
GD1 d47:2_10.6	1.60892	1.0451e-21	5.1031e-20	0.15791	-2.6628			GD1 t32:6_22.39	0.95477
GT2 d43:0_11.86	1.62336	1.1434e-21	5.4278e-20	0.11454	-3.1261			GD2 d45:1_8.3	0.95284
Gg4 d31:2_9.8	1.63381	1.6865e-21	7.7896e-20	0.15442	-2.6951			GD3 t38:4_11.34	0.95179
HexCer d45:6_13.14	1.57274	2.2755e-21	1.0234e-19	0.28464	-1.8128			GD2 d34:5_16.1	0.94951
GM1 t38:5_13.53	1.64154	2.9563e-21	1.2955e-19	0.16866	-2.5678			NAP d28:5_22.2	0.94793
GD1 t36:4_15.29	1.61404	9.9857e-21	4.2664e-19	0.29595	-1.7566			GT3 d30:0_15.45	0.94741
NAP d28:5_15.34	1.62784	1.1265e-20	4.6954e-19	0.38696	-1.3698			Cer t33:0_16.46	0.94267
GM3 t30:4_9.44	1.62526	1.361e-20	5.538e-19	0.13834	-2.8537			HexCer d32:2_22.43	0.9425
GD2 d34:5_16.1	1.57617	1.6102e-20	6.3997e-19	0.27026	-1.8876			GD1 t36:4_15.29	0.94144
GD1 d33:4_22.72	1.61835	1.9828e-20	7.7014e-19	0.18041	-2.4706			GD2 t47:1_8.18	0.93864
HexCer d36:1_22.7	1.54528	3.2187e-20	1.2224e-18	0.30601	-1.7084			Cer d32:1_22.44	0.93846
GT1 d44:0_11.58	1.60369	4.0881e-20	1.5188e-18	0.069053	-3.8562			Cer1P t33:0_22.43	0.93759
GT2 t45:0_11.8	1.586	6.2911e-20	2.2875e-18	0.086247	-3.5354			GT3 t41:2_12.29	0.93689
GM3 d31:5_12.89	1.60684	6.4888e-20	2.3103e-18	0.13542	-2.8844			GD1 d33:4_22.72	0.93478
GD1 t36:4_20.73	1.59345	9.0691e-20	3.1631e-18	0.17211	-2.5386			GD1 t36:4_20.73	0.93338
LacCer d37:0_17.77	1.55603	1.8185e-19	6.2158e-18	0.38924	-1.3613			GM1 t30:3_8.19	0.93285
GM2 d36:5_11.79	1.59725	2.1307e-19	7.1398e-18	0.14185	-2.8175			Cer t34:3_19.89	0.92847
GT1 t46:0_11.49	1.57728	3.0679e-19	1.0083e-17	0.06829	-3.8722			HexCer d36:1_22.7	0.92777
GD2 d35:4_16.06	1.59957	3.2475e-19	1.0472e-17	0.14648	-2.7712			LacCer t37:4_22.31	0.92759
GT3 t41:2_12.29	1.51216	4.3767e-19	1.3851e-17	0.33416	-1.5814			Cer d36:2_22.37	0.92619
LacCer t37:4_22.31	1.5129	4.7325e-19	1.4705e-17	0.25309	-1.9823			GD1 t38:3_15.27	0.92602
Cer t33:0_16.46	1.56031	1.0379e-18	3.1673e-17	0.409	-1.2898			Cer t35:0_19.62	0.92479
Lyso GM1 d23:2_21.68	1.56577	1.1772e-18	3.5297e-17	0.22025	-2.1828			GD2 d42:4_10.92	0.92391
GT3 d30:0_15.45	1.53243	2.6851e-18	7.9119e-17	0.40725	-1.296			Cer d31:0_19.89	0.92304
Cer t34:3_19.89	1.57203	2.8756e-18	8.3294e-17	0.38416	-1.3802			GM4 d32:2_22.93	0.92251
Cer d31:0_19.89	1.55833	1.1418e-17	3.1988e-16	0.3922	-1.3503			LacCer t41:5_2.1	0.92216
HexCer t33:0_31.27	1.52247	1.1391e-17	3.1988e-16	0.075461	-3.7281			NAP t26:5_10.77	0.92076
GM1 t30:3_8.19	1.52227	1.4848e-17	4.0927e-16	0.31483	-1.6674			Cer t32:4_10.02	0.91883
HexCer d35:5_2.45	1.51787	1.6956e-17	4.5998e-16	114.96	6.845			Cer d21:1_15.38	0.9183
HexCer d23:1_24.34	1.55389	2.1512e-17	5.7443e-16	0.14075	-2.8288			Lyso GM1 d23:2_21.68	0.91725
Cer t36:2_18.97	1.5194	5.5762e-17	1.4606e-15	0.42825	-1.2235			GD2 d35:4_16.06	0.9169
GD2 d36:4_9.44	1.51962	5.6408e-17	1.4606e-15	0.24608	-2.0228			HexCer d39:5_16.3	0.9169
Sulfatide d47:4_2.52	1.50831	7.8457e-17	2.0013e-15	119.55	6.9015			Cer t36:2_18.97	0.91602
Cer d21:1_15.38	1.49019	2.0842e-16	5.1623e-15	0.16082	-2.6364			Cer t33:3_19.92	0.91287
Gb3 t50:2_3.39	1.44829	2.3905e-16	5.8362e-15	343.38	8.4237			GD1 d48:6_9.34	0.91182
GD1 d43:2_12.8	1.46624	2.5433e-16	6.1217e-15	0.1199	-3.0601			GD1 d50:6_11.96	0.90989
LacCer t44:4_3.4	1.49485	2.8584e-16	6.7848e-15	151.92	7.2471			HexCer d23:1_24.34	0.90901
Cer d27:1_9.69	1.5071	3.5482e-16	8.3067e-15	0.17094	-2.5484			GD1 d36:1_15.16	0.90638
Lyso GM1 d24:2_9.41	1.49976	3.889e-16	8.9815e-15	0.31385	-1.6718			HexCer t38:7_2.42	0.9048
Cer t33:3_19.92	1.51527	4.2181e-16	9.6117e-15	0.4144	-1.2709			Lyso GM1 d24:2_9.41	0.90375
Sulfatide d39:0_2.68	1.51431	4.5254e-16	1.0176e-14	155.5	7.2808			GT2 d43:0_11.86	0.90217
HexCer t38:7_2.42	1.5097	5.2757e-16	1.159e-14	16.78	4.0687			Cer1P d26:0_9.22	0.90217
Sulfatide d48:4_2.92	1.48558	5.2897e-16	1.159e-14	466.37	8.8653			NAP m15:0_2.45	0.90147
Cer d36:2_22.37	1.42847	6.2744e-16	1.3573e-14	0.27238	-1.8763			HexCer d35:5_2.45	0.90007
LacCer d45:3_33.81	1.46655	6.9261e-16	1.4796e-14	0.244	-2.035			Gb3 t42:1_30.14	0.89744
Cer1P m40:6_3.11	1.52022	7.3078e-16	1.5419e-14	111.15	6.7963			Sulfatide d41:2_9.19	0.89639
Gb3 d39:5_9.69	1.49763	8.0911e-16	1.6863e-14	0.080415	-3.6364			Cer d27:1_9.69	0.89358
HexCer d35:2_34.49	1.38859	9.49e-16	1.954e-14	0.13858	-2.8512			GM1 d43:1_6.56	0.89323
HexCer d36:5_28.23	1.43828	1.1091e-15	2.2566e-14	0.25337	-1.9807			Gb3 d39:5_9.69	0.89236
Gb3 d47:2_2.93	1.43542	1.1881e-15	2.3888e-14	254.83	7.9934			Gb3 t36:0_8.89	0.89218
GM4 t45:1_3.13	1.45049	1.259e-15	2.5019e-14	67.268	6.0718			Sulfatide d34:3_8.59	0.89078
GM1 d43:1_6.56	1.46719	2.4389e-15	4.7908e-14	0.10538	-3.2464			GD2 d36:4_9.44	0.89025
GT1 d37:1_22.74	1.42925	3.0427e-15	5.909e-14	0.4036	-1.309			Lyso GM1 d15:0_17.89	0.8899
Cer t35:0_19.62	1.43388	3.9771e-15	7.6369e-14	0.36287	-1.4625			HexCer d47:1_19.98	0.88885
HexCer d39:5_16.3	1.44452	4.7027e-15	8.9299e-14	0.46314	-1.1105			HexCer d37:2_14.24	0.88727
NAP m15:0_2.45	1.48056	4.8246e-15	9.0607e-14	5.8298	2.5434			GA2 t33:2_6.55	0.8871
GD1 d36:1_15.16	1.4294	6.4605e-15	1.2001e-13	0.22977	-2.1217			Cer d32:3_21.24	0.88657
Gb3 t49:2_2.91	1.373	7.745e-15	1.4233e-13	94.366	6.5602			Cer d34:5_22.43	0.8864
GA2 d44:1_2.98	1.43971	8.7889e-15	1.5979e-13	52.685	5.7193			GT1 d37:1_22.74	0.88569
NAP t26:5_10.77	1.37413	1.1941e-14	2.1481e-13	0.45024	-1.1512			Cer m28:2_18.91	0.88569
GM4 t44:2_5.75	1.47304	1.2201e-14	2.172e-13	0.17364	-2.5258			LacCer t36:2_19.38	0.88412
Sulfatide d50:4_9.66	1.43782	1.388e-14	2.4454e-13	0.20452	-2.2897			Cer t24:1_2.4	0.88324
FGM1 t33:0_15.71	1.42711	1.4585e-14	2.5434e-13	0.26626	-1.9091			Gb3 t38:2_32.58	0.88149
Gb3 t38:2_32.58	1.42998	1.6102e-14	2.7795e-13	0.32722	-1.6117			HexCer d36:5_28.23	0.88061
Gb3 d34:4_5.83	1.46136	1.961e-14	3.3514e-13	0.14042	-2.8322			Cer m34:2_21.26	0.88061
Cer1P d28:1_8.58	1.45872	2.3659e-14	4.0033e-13	0.067025	-3.8992			Cer1P d36:4_19.88	0.88043
GT2 d38:1_14.67	1.41003	2.5606e-14	4.2903e-13	0.32596	-1.6172			NAP m25:2_22.36	0.87938
GD2 d42:4_10.92	1.33957	2.8796e-14	4.7779e-13	0.49948	-1.0015			Cer d34:3_16.53	0.87763
Gb3 d48:2_3.57	1.47991	3.2857e-14	5.2974e-13	413.22	8.6908			Cer d47:6_13.45	0.87728
Gb3 t42:1_30.14	1.34752	3.2323e-14	5.2974e-13	0.29743	-1.7494			GM2 t49:0_6.54	0.8771
GM4 d38:5_5.75	1.45781	3.2826e-14	5.2974e-13	0.078433	-3.6724			GD2 d36:2_9.09	0.8757
Cer1P d30:1_12.18	1.43725	5.7642e-14	9.1212e-13	0.096491	-3.3735			FGM1 t33:0_15.71	0.87553
LacCer t41:5_2.1	1.36422	5.7541e-14	9.1212e-13	3.6725	1.8768			GM4 t45:1_3.13	0.8743
HexCer t38:7_4.85	1.46565	6.8127e-14	1.0584e-12	59.509	5.895			LacCer t44:4_3.4	0.87412
Cer d34:5_22.43	1.35583	6.9433e-14	1.069e-12	0.28395	-1.8163			Gb3 t50:2_3.39	0.87342
GA2 d45:1_3.55	1.47014	7.7198e-14	1.178e-12	191.92	7.5844			Cer1P m40:6_3.11	0.87307
GD3 d47:3_6.47	1.44168	8.8155e-14	1.3332e-12	0.1413	-2.8232			Sulfatide d50:4_9.66	0.87219
Cer1P t28:1_9.37	1.43657	1.0109e-13	1.5155e-12	0.077323	-3.693			Sulfatide d47:4_2.52	0.87184
LacCer t49:3_7.33	1.47467	1.165e-13	1.7313e-12	11.481	3.5212			LacCer t31:1_12.91	0.87167
GD1 d34:1_21.26	1.41129	1.2851e-13	1.8933e-12	0.11173	-3.162			GT2 t43:1_7.93	0.87044
GA2 t33:2_6.55	1.39592	1.4355e-13	2.0968e-12	0.12461	-3.0045			Sulfatide t44:1_7.06	0.86921
Cer1P t28:2_7.33	1.43547	1.4574e-13	2.1108e-12	0.058077	-4.1059			HexCer t36:4_25.02	0.86553
Cer1P m44:2_31.32	1.4086	1.6865e-13	2.4221e-12	0.13769	-2.8605			GT1 d44:0_11.58	0.86518
Cer1P t26:0_9.67	1.43594	2.1261e-13	3.0279e-12	0.11567	-3.1119			HexCer d35:2_34.49	0.86431
NAP m25:2_22.36	1.3162	2.1524e-13	3.0401e-12	0.32329	-1.6291			GM4 t48:0_3.39	0.86203
HexCer t36:4_25.02	1.35557	2.2238e-13	3.1151e-12	2.6781	1.4212			GT2 t45:0_11.8	0.86097
Gb3 d47:6_30.02	1.31569	3.0772e-13	4.2756e-12	0.41652	-1.2635			Cer1P t44:1_30.41	0.86062
GM4 d40:5_7.33	1.42767	3.7536e-13	5.1733e-12	0.044158	-4.5012			Cer d36:3_24.29	0.85957
Cer d32:3_21.24	1.32437	3.9313e-13	5.3749e-12	0.30765	-1.7006			Cer1P d30:1_12.18	0.8594
GM2 t49:0_6.54	1.40709	4.0663e-13	5.5153e-12	0.04179	-4.5807			Gb3 d47:6_30.02	0.85922
Gb3 d50:6_22.78	1.3719	4.1148e-13	5.5371e-12	0.44754	-1.1599			GD1 d43:2_12.8	0.85817
Cer1P t26:0_8.85	1.42665	4.8428e-13	6.4659e-12	0.062801	-3.9931			Gb3 t36:2_6.51	0.85747
GA2 d32:1_5.2	1.39657	5.0379e-13	6.6743e-12	0.048426	-4.3681			GM1 d33:5_14.13	0.85747
Gb3 t36:0_8.89	1.39653	5.8099e-13	7.5795e-12	0.035171	-4.8295			Cer d38:4_29.52	0.85624
GM4 d36:2_6.48	1.40807	5.796e-13	7.5795e-12	0.061618	-4.0205			HexCer t33:0_31.27	0.85379
HexCer d37:2_14.24	1.29007	6.832e-13	8.8454e-12	0.44233	-1.1768			FGM1 d39:4_8.38	0.85361
Cer1P t26:1_5.87	1.40578	9.6856e-13	1.2446e-11	0.10553	-3.2442			GT1 t46:0_11.49	0.85344
Cer1P t24:0_5.2	1.41562	1.1068e-12	1.4116e-11	0.074377	-3.749			GA2 d44:1_2.98	0.85238
Cer m34:2_21.26	1.30283	1.1295e-12	1.4298e-11	0.30457	-1.7151			LacCer t35:3_20.14	0.85221
GD1 t38:3_15.27	1.26537	1.1925e-12	1.4985e-11	0.4147	-1.2699			GD1 d34:1_21.26	0.85203
GM4 t48:0_3.39	1.40246	1.2307e-12	1.5352e-11	6.1849	2.6287
Cer1P t23:0_5.2	1.40435	1.5947e-12	1.9749e-11	0.095855	-3.383
Cer1P t28:0_13.31	1.39281	1.6278e-12	2.0014e-11	0.14181	-2.818
Gb3 d42:1_32.45	1.38549	2.2661e-12	2.7663e-11	0.32855	-1.6058
GD1 t34:4_14.53	1.34912	2.971e-12	3.601e-11	0.20832	-2.2631
Cer1P d36:4_19.88	1.37234	3.0314e-12	3.6483e-11	0.297	-1.7515
Cer t24:1_2.4	1.29253	3.328e-12	3.9773e-11	7.2522	2.8584
NAP m17:1_2.87	1.3987	3.5522e-12	4.2157e-11	8.1444	3.0258
Cer1P d32:1_15.74	1.37128	3.7489e-12	4.4186e-11	0.11531	-3.1164
GD1 t38:5_29.81	1.3911	4.0158e-12	4.7007e-11	0.39429	-1.3427
GD1 d48:6_9.34	1.33344	4.3128e-12	5.014e-11	0.35906	-1.4777
Cer1P t26:2_3.99	1.35868	4.5187e-12	5.2178e-11	0.07916	-3.6591
Cer m28:2_18.91	1.33408	4.6001e-12	5.241e-11	0.48195	-1.0531
Gb3 t36:2_6.51	1.3573	4.5753e-12	5.241e-11	0.010883	-6.5218
Cer t39:5_20.4	1.32584	4.9028e-12	5.5489e-11	0.41188	-1.2797
Cer d36:3_24.29	1.34998	5.0788e-12	5.7103e-11	0.40696	-1.297
GT2 t43:1_7.93	1.3272	5.1185e-12	5.7173e-11	0.41807	-1.2582
GD1 t30:6_29.73	1.36064	5.8318e-12	6.4717e-11	0.38447	-1.3791
Cer1P d23:0_6.89	1.38227	6.2876e-12	6.9326e-11	0.058174	-4.1035
GA2 t32:3_30.75	1.35848	6.7834e-12	7.4313e-11	0.25509	-1.9709
Gb3 t45:6_29.82	1.38041	6.9311e-12	7.5447e-11	0.38339	-1.3831
GD1 d43:3_7.51	1.34907	7.2178e-12	7.8071e-11	0.3803	-1.3948
GA2 d40:3_29.82	1.38497	9.2091e-12	9.8983e-11	0.37633	-1.4099
Cer1P t26:1_6.53	1.38442	9.3721e-12	1.0011e-10	0.083615	-3.5801
HexCer t44:6_9.58	1.35571	9.5205e-12	1.0106e-10	0.2269	-2.1399
Cer1P t24:0_7.69	1.38069	9.7487e-12	1.0284e-10	0.087459	-3.5152
GM4 t50:1_7.44	1.4287	1.0151e-11	1.0643e-10	5.435	2.4423
GM4 t46:1_3.67	1.50043	1.1232e-11	1.1705e-10	84.816	6.4063
Cer1P d32:1_18.79	1.35833	1.1448e-11	1.1797e-10	0.11451	-3.1265
Cer1P t24:0_5.85	1.37783	1.1459e-11	1.1797e-10	0.14342	-2.8017
Cer t37:1_29.81	1.38902	1.189e-11	1.2168e-10	0.35384	-1.4988
Cer1P d26:1_7.57	1.37866	1.1998e-11	1.2205e-10	0.061673	-4.0192
GD2 d36:2_9.09	1.26081	1.2656e-11	1.2798e-10	0.46954	-1.0907
Cer1P t25:0_7.69	1.37016	1.683e-11	1.682e-10	0.11725	-3.0924
Cer d38:4_29.52	1.30859	1.7898e-11	1.768e-10	2.5363	1.3428
HexCer t38:4_21.03	1.33959	1.9027e-11	1.8688e-10	0.174	-2.5228
Cer1P t44:1_30.41	1.27342	1.9589e-11	1.913e-10	0.15376	-2.7013
HexCer d47:1_19.98	1.30188	2.0007e-11	1.9427e-10	0.42076	-1.2489
Cer m36:3_20.4	1.29708	2.0436e-11	1.9731e-10	0.41663	-1.2632
Cer1P d26:0_9.22	1.22675	2.0804e-11	1.9974e-10	0.33786	-1.5655
NAP m21:4_6.42	1.37435	2.1001e-11	2.005e-10	0.080345	-3.6376
Cer t39:4_29.83	1.37078	2.1377e-11	2.0073e-10	0.39147	-1.353
LacCer t38:3_30.75	1.34341	2.1236e-11	2.0073e-10	0.2734	-1.8709
Lyso GM1 d15:0_17.89	1.26579	2.1365e-11	2.0073e-10	0.43597	-1.1977
HexCer d48:5_33.58	1.31079	2.1754e-11	2.0315e-10	0.3793	-1.3986
GD3 t30:1_20.8	1.28767	2.3321e-11	2.1544e-10	0.35409	-1.4978
Gb3 d42:4_31.17	1.35147	2.523e-11	2.3182e-10	0.1606	-2.6385
GT2 d38:2_17.9	1.3101	2.7637e-11	2.5258e-10	0.37258	-1.4244
HexCer d45:4_31.61	1.34307	2.8682e-11	2.6073e-10	0.22722	-2.1379
GA2 d30:2_3.19	1.369	2.8885e-11	2.6119e-10	4.2176	2.0764
Cer1P t22:0_7.96	1.34262	2.9706e-11	2.672e-10	0.15366	-2.7022
Cer1P d30:0_14.98	1.3503	3.0482e-11	2.7261e-10	0.14675	-2.7686
FGM1 t30:3_29.67	1.34215	3.0627e-11	2.7261e-10	0.24467	-2.0311
Sulfatide t41:0_31.42	1.33878	3.4648e-11	3.068e-10	0.4268	-1.2284
LacCer d47:3_7.79	1.34233	3.5921e-11	3.1644e-10	5.7032	2.5118
Cer1P t24:0_7.42	1.33173	3.7594e-11	3.2948e-10	0.19189	-2.3817
LacCer t36:2_19.38	1.29745	4.2484e-11	3.7044e-10	0.45881	-1.124
Gb3 d44:4_32.95	1.35554	4.2971e-11	3.7278e-10	0.16522	-2.5976
GA2 d29:2_3.4	1.36085	4.4503e-11	3.8412e-10	4.4557	2.1556
Cer d33:2_21.96	1.2997	4.7535e-11	4.0822e-10	0.41386	-1.2728
Gb3 d33:3_31.77	1.2852	5.0149e-11	4.2852e-10	0.42961	-1.2189
LacCer t31:1_12.91	1.20895	5.0835e-11	4.3222e-10	0.45701	-1.1297
LacCer d37:2_29.68	1.33601	6.2557e-11	5.2665e-10	0.38772	-1.3669
Cer d33:3_20.99	1.24169	6.7843e-11	5.6836e-10	0.4928	-1.0209
Cer1P t30:0_17.31	1.30432	7.8052e-11	6.5069e-10	0.1559	-2.6813
Cer1P d26:0_10.85	1.34851	8.0132e-11	6.6479e-10	0.082088	-3.6067
Cer1P t27:1_8.22	1.34617	1.0313e-10	8.4732e-10	0.084552	-3.564
Gb3 t32:2_2.5	1.34238	1.0519e-10	8.6018e-10	4.2956	2.1028
HexCer t46:6_31.84	1.31824	1.1373e-10	9.2552e-10	0.36987	-1.4349
HexCer d44:5_32.66	1.31688	1.1678e-10	9.4587e-10	0.25274	-1.9843
HexCer d47:5_32.67	1.31587	1.1755e-10	9.4759e-10	0.19785	-2.3375
GA2 t32:2_32.55	1.31797	1.1953e-10	9.5902e-10	0.32086	-1.64
Cer1P t48:6_26.83	1.29273	1.2013e-10	9.5937e-10	0.22085	-2.1789
Gb3 t36:3_4.36	1.31589	1.2242e-10	9.7311e-10	0.019125	-5.7084
Sulfatide d44:3_31.48	1.32345	1.2457e-10	9.8259e-10	0.42737	-1.2265
Sulfatide t44:2_4.75	1.29082	1.3368e-10	1.048e-09	9.1701	3.1969
GT1 t49:0_9.34	1.29552	1.4544e-10	1.135e-09	0.22596	-2.1459
GD2 t31:1_32.57	1.32712	1.5984e-10	1.2305e-09	0.19297	-2.3736
Cer d23:0_8.83	1.22901	1.6107e-10	1.2344e-09	0.24304	-2.0407
Cer1P t29:1_22.75	1.20972	1.6999e-10	1.2969e-09	0.45342	-1.1411
Cer m37:3_29.8	1.34343	1.8332e-10	1.3924e-09	0.37463	-1.4165
LacCer t38:0_30.81	1.29361	1.878e-10	1.4201e-09	0.31332	-1.6743
Cer1P t26:2_4.43	1.3228	2.1439e-10	1.607e-09	0.10239	-3.2879
Cer1P t46:0_32.48	1.33054	2.3265e-10	1.7363e-09	0.40639	-1.2991
HexCer d37:5_3.71	1.51113	2.3483e-10	1.7449e-09	39.538	5.3052
Cer t42:0_29.75	1.32303	2.504e-10	1.8525e-09	0.38704	-1.3694
Gb3 d50:2_5.13	1.51138	3.1309e-10	2.2866e-09	71.003	6.1498
GM4 t50:0_4.22	1.24359	3.4307e-10	2.4949e-09	0.34288	-1.5442
Cer t34:0_24.85	1.30869	3.4899e-10	2.5272e-09	0.48605	-1.0408
GD1 d34:4_21.81	1.24765	3.6106e-10	2.6036e-09	0.35279	-1.5031
Cer1P t41:0_32.59	1.30266	3.7456e-10	2.6896e-09	0.40737	-1.2956
HexCer t48:0_31.16	1.26269	4.0429e-10	2.8909e-09	0.4294	-1.2196
Cer1P t42:3_26.58	1.31343	4.3455e-10	3.0944e-09	0.21468	-2.2198
FGM1 d39:4_8.38	1.25622	4.3769e-10	3.1038e-09	0.44048	-1.1829
Cer1P t44:3_26.99	1.30447	4.4206e-10	3.1218e-09	0.2296	-2.1228
Cer1P m45:2_21.65	1.26419	4.6505e-10	3.2707e-09	0.31711	-1.6569
Sulfatide d40:4_21.99	1.26508	5.2332e-10	3.6356e-09	0.37822	-1.4027
GM3 d40:5_24.2	1.28914	5.5099e-10	3.8123e-09	0.31606	-1.6617
Cer1P d35:1_24.01	1.2949	5.5389e-10	3.817e-09	0.17697	-2.4984
Sulfatide t46:0_6.91	1.35703	5.6415e-10	3.872e-09	4.0973	2.0347
FGM1 t30:3_29.66	1.29036	5.7533e-10	3.9329e-09	0.28015	-1.8357
Cer1P t48:0_32.51	1.31518	6.1373e-10	4.1465e-09	0.2015	-2.3111
HexCer d43:1_9.44	1.2979	6.1385e-10	4.1465e-09	0.29297	-1.7712
GD1 t36:2_21.27	1.21983	6.3747e-10	4.2891e-09	0.22387	-2.1593
GM4 t48:1_5.38	1.47723	6.6873e-10	4.4818e-09	15.78	3.98
LacCer d45:3_36.29	1.24628	6.8335e-10	4.5619e-09	0.30525	-1.712
Sulfatide t42:2_29.14	1.25668	6.9715e-10	4.6359e-09	0.2164	-2.2082
LacCer t37:1_30.5	1.26064	7.4978e-10	4.9665e-09	0.20788	-2.2662
GM4 d34:6_32.57	1.2504	7.5958e-10	5.012e-09	0.3721	-1.4262
Cer1P t24:1_3.75	1.30397	7.9493e-10	5.2251e-09	0.12851	-2.96
GM3 d36:5_22.99	1.31805	8.3334e-10	5.4358e-09	0.3609	-1.4703
HexCer d43:1_32.41	1.22466	8.5201e-10	5.5364e-09	0.20202	-2.3074
GM4 t47:6_29.14	1.30545	8.6664e-10	5.6102e-09	0.18453	-2.4381
Sulfatide d46:4_32.59	1.30479	8.8449e-10	5.7042e-09	0.39843	-1.3276
Gb3 t35:2_29.79	1.31761	9.6746e-10	6.2158e-09	0.3892	-1.3614
Sulfatide t46:1_5.68	1.26895	9.7775e-10	6.2584e-09	0.23686	-2.0779
Cer1P t29:3_10.78	1.25008	1.0213e-09	6.5125e-09	0.20316	-2.2993
Cer1P t25:1_4.94	1.2975	1.0346e-09	6.5728e-09	0.1067	-3.2284
LacCer d43:4_32.47	1.29215	1.05e-09	6.646e-09	0.38602	-1.3733
Sulfatide t43:3_29.85	1.26159	1.0604e-09	6.6869e-09	0.28945	-1.7886
LacCer t47:3_5.08	1.50134	1.1042e-09	6.9124e-09	43.898	5.4561
Cer m34:2_25.01	1.2737	1.1244e-09	6.9878e-09	0.36281	-1.4627
Cer1P t48:4_29.26	1.24228	1.3225e-09	8.1595e-09	0.17202	-2.5393
Cer1P t30:3_13.32	1.27534	1.3496e-09	8.2969e-09	0.16243	-2.6221
Sulfatide t42:0_30.76	1.2958	1.3651e-09	8.3618e-09	0.29553	-1.7586
Gb3 t39:1_29.75	1.31027	1.4132e-09	8.5978e-09	0.38811	-1.3655
HexCer t41:1_29.56	1.29427	1.4137e-09	8.5978e-09	0.22459	-2.1546
Cer1P d23:0_11.31	1.2982	1.4742e-09	8.934e-09	0.077258	-3.6942
Sulfatide t44:3_31.31	1.27846	1.4996e-09	9.056e-09	0.41215	-1.2788
LacCer d33:1_12.1	1.25861	1.5392e-09	9.2624e-09	11.788	3.5593
Cer1P t44:5_24.89	1.29086	1.6317e-09	9.7846e-09	0.44716	-1.1611
Sulfatide d43:4_29.14	1.25928	1.6748e-09	1.0008e-08	0.31207	-1.68
Cer t25:1_9.68	1.29267	1.8145e-09	1.0805e-08	0.21992	-2.185
LacCer d30:0_23.41	1.27914	1.9249e-09	1.1423e-08	0.28905	-1.7906
Cer1P t28:3_5.36	1.29124	2.0785e-09	1.2291e-08	0.043292	-4.5298
Gg4 d34:4_23.03	1.23016	2.1784e-09	1.2838e-08	0.41368	-1.2734
GM4 d44:1_3.83	1.46741	2.2829e-09	1.3407e-08	39.284	5.2959
Cer t37:0_22.18	1.26481	2.2979e-09	1.3449e-08	0.33575	-1.5745
Cer d33:3_22.18	1.26481	2.3209e-09	1.3537e-08	0.33574	-1.5746
Gb3 t30:2_32.55	1.23028	2.3354e-09	1.3576e-08	0.38522	-1.3763
Cer1P t42:2_26.95	1.26707	2.3584e-09	1.3663e-08	0.24852	-2.0086
HexCer d43:3_31.18	1.26725	2.4144e-09	1.394e-08	0.44823	-1.1577
Cer1P t21:0_6.02	1.28436	2.4607e-09	1.4159e-08	0.14238	-2.8122
GM3 d36:3_23.04	1.28126	2.5259e-09	1.4486e-08	0.3488	-1.5195
Cer1P t42:3_28.65	1.28528	2.597e-09	1.4844e-08	0.20769	-2.2675
Cer1P t40:0_28.61	1.29018	2.6395e-09	1.5036e-08	0.22366	-2.1607
LacCer d42:6_3.65	1.297	2.8105e-09	1.5957e-08	10.751	3.4265
GM4 t47:5_31.27	1.25823	2.9541e-09	1.6701e-08	0.32841	-1.6064
HexCer t46:4_34.06	1.2117	2.961e-09	1.6701e-08	0.21145	-2.2416
Cer1P t28:3_4.86	1.24079	2.9994e-09	1.6862e-08	0.090584	-3.4646
Cer m32:0_34.28	1.20001	3.0471e-09	1.7074e-08	2.6795	1.422
Cer1P d32:0_19.17	1.27419	3.1039e-09	1.7335e-08	0.20423	-2.2917
Cer m41:2_32.54	1.22784	3.1318e-09	1.7424e-08	0.35217	-1.5057
Gb3 t41:1_31.25	1.27517	3.1401e-09	1.7424e-08	0.43146	-1.2127
Cer1P d48:2_31.78	1.25176	3.1712e-09	1.7539e-08	0.26525	-1.9146
GD3 d34:2_19.94	1.18457	3.4164e-09	1.8774e-08	0.33541	-1.576
LacCer t46:3_4.21	1.47115	3.4283e-09	1.8779e-08	28.234	4.8194
Cer m34:3_22.78	1.26153	3.7928e-09	2.0577e-08	0.29141	-1.7789
HexCer d46:5_30.45	1.23197	3.8719e-09	2.094e-08	0.25764	-1.9565
Cer1P t28:3_6.17	1.26625	4.1536e-09	2.2253e-08	0.061209	-4.0301
GD3 t39:2_24.96	1.27993	4.2323e-09	2.2603e-08	0.43401	-1.2042
Gb3 d34:2_22.28	1.24731	4.3111e-09	2.2952e-08	0.28425	-1.8148
Cer d34:3_22.15	1.25092	4.4362e-09	2.3545e-08	0.34065	-1.5536
Gb3 d49:2_4.21	1.47439	4.4759e-09	2.3682e-08	27.537	4.7833
Cer1P t44:3_28.8	1.26937	4.5181e-09	2.3831e-08	0.18459	-2.4376
HexCer d47:4_31.29	1.2472	4.9827e-09	2.6202e-08	0.43831	-1.19
Gb3 d37:5_30.82	1.24056	5.0553e-09	2.6502e-08	0.35647	-1.4882
GM4 d35:3_4.39	1.26834	5.1561e-09	2.6947e-08	0.056103	-4.1558
GA2 d47:1_5.06	1.49123	5.6723e-09	2.9465e-08	25.942	4.6972
GM4 d34:1_33.46	1.25526	5.7564e-09	2.9811e-08	0.3529	-1.5027
GM4 t47:5_30.98	1.2578	6.4108e-09	3.2901e-08	0.21765	-2.1999
GM3 t34:0_6.75	1.24616	6.4645e-09	3.3077e-08	0.2394	-2.0625
Gb3 d32:2_32.56	1.24185	6.6958e-09	3.4159e-08	0.31022	-1.6886
Sulfatide t34:2_20.43	1.23314	6.7552e-09	3.4359e-08	0.17701	-2.4981
Cer1P t48:5_28.14	1.26343	6.9365e-09	3.5176e-08	0.25005	-1.9997
Cer1P t21:0_3.28	1.25815	7.5503e-09	3.8063e-08	0.12658	-2.9819
Gb3 d37:4_25.84	1.25666	7.9752e-09	3.9853e-08	0.43463	-1.2021
LacCer d34:1_25.02	1.22537	8.0929e-09	4.0323e-08	0.39349	-1.3456
Cer1P m36:7_8.78	1.21004	8.2707e-09	4.1089e-08	0.25836	-1.9525
Cer m40:2_29.68	1.27527	8.6435e-09	4.2816e-08	0.41494	-1.269
HexCer t38:1_28.6	1.26031	8.673e-09	4.2838e-08	0.44902	-1.1551
Cer1P t42:0_30.7	1.27193	9.0686e-09	4.4663e-08	0.22544	-2.1492
GM4 d35:4_32.55	1.2432	9.2577e-09	4.5464e-08	0.39706	-1.3326
Sulfatide d41:0_3.93	1.48151	1.0279e-08	5.0332e-08	22.849	4.5141
Cer t40:0_28.91	1.19798	1.1158e-08	5.4022e-08	0.49419	-1.0169
GM3 d42:2_28.04	1.24076	1.1693e-08	5.6449e-08	0.48133	-1.0549
HexCer t41:0_31.75	1.26253	1.2062e-08	5.8066e-08	0.27077	-1.8848
Cer m41:3_28.61	1.25525	1.2144e-08	5.83e-08	0.44432	-1.1703
Cer d41:0_31.3	1.25205	1.2547e-08	6.0065e-08	0.42406	-1.2377
GM4 d34:4_32.56	1.22275	1.3601e-08	6.4929e-08	0.3608	-1.4707
Cer1P d34:1_19.84	1.21786	1.3958e-08	6.6262e-08	0.18113	-2.4649
HexCer d41:1_30.66	1.24574	1.4056e-08	6.6542e-08	0.38239	-1.3869
GD1 d40:3_9.46	1.2378	1.4596e-08	6.8535e-08	0.37246	-1.4248
HexCer t41:0_31.42	1.24676	1.4597e-08	6.8535e-08	0.27283	-1.8739
LacCer d38:0_28.63	1.2507	1.5694e-08	7.3082e-08	0.45493	-1.1363
LacCer t41:5_32.47	1.21141	1.5638e-08	7.3082e-08	0.42392	-1.2381
LacCer t39:2_33.46	1.21831	1.6061e-08	7.4588e-08	0.4185	-1.2567
GM1 t40:0_4.33	1.2272	1.6896e-08	7.8252e-08	0.12173	-3.0382
Cer1P t46:1_34.11	1.15455	2.0329e-08	9.3144e-08	0.49416	-1.017
LacCer d45:3_5.35	1.47911	2.0903e-08	9.5516e-08	17.316	4.114
Sulfatide t38:0_31.12	1.23568	2.1422e-08	9.7369e-08	0.43046	-1.2161
FGM1 t32:1_33.46	1.23581	2.1654e-08	9.816e-08	0.16259	-2.6207
GD1 t38:3_21.64	1.14678	2.2335e-08	1.0098e-07	0.36833	-1.4409
GM1 t42:2_29	1.2332	2.2872e-08	1.0287e-07	0.46941	-1.0911
Cer1P t46:5_26.58	1.25001	2.3137e-08	1.0351e-07	0.32048	-1.6417
HexCer t42:2_33.45	1.2255	2.3122e-08	1.0351e-07	0.30067	-1.7338
LacCer d40:5_30.19	1.13722	2.3743e-08	1.0567e-07	0.45861	-1.1246
Cer1P t42:1_28.64	1.23964	2.3953e-08	1.0633e-07	0.25099	-1.9943
GM3 t37:0_33.96	1.11795	2.4268e-08	1.0717e-07	0.4739	-1.0773
GM1 d37:4_23.8	1.20511	2.4702e-08	1.0852e-07	0.40545	-1.3024
HexCer d43:6_28.11	1.24592	2.4641e-08	1.0852e-07	0.26324	-1.9255
GT2 t41:1_17.97	1.16438	2.5666e-08	1.1247e-07	0.41102	-1.2827
LacCer d40:4_31.75	1.17329	2.5895e-08	1.1318e-07	0.4661	-1.1013
LacCer d36:0_33.57	1.19677	2.6644e-08	1.1587e-07	0.4338	-1.2049
Sulfatide t44:2_32.37	1.18189	2.7267e-08	1.1797e-07	0.46845	-1.094
Cer1P t46:6_24.71	1.22528	2.7552e-08	1.189e-07	0.26292	-1.9273
Cer d34:4_24.73	1.16222	2.7933e-08	1.1994e-07	2.3534	1.2347
GD1 t45:3_7.47	1.16603	2.7884e-08	1.1994e-07	0.39134	-1.3535
Cer1P t40:1_28.3	1.24092	3.0263e-08	1.293e-07	0.21976	-2.186
FGM1 t44:4_28.05	1.23343	3.1712e-08	1.3515e-07	0.49001	-1.0291
Cer t23:1_6.2	1.23738	3.2845e-08	1.3894e-07	0.2068	-2.2737
Cer1P d48:5_29.76	1.24677	3.5486e-08	1.4901e-07	0.26994	-1.8893
HexCer t43:6_28.99	1.22429	3.568e-08	1.4945e-07	0.47426	-1.0762
GM4 t49:1_6.34	1.40401	3.6409e-08	1.5213e-07	6.4736	2.6946
Cer d36:0_28.84	1.23137	3.7681e-08	1.5668e-07	0.48881	-1.0326
HexCer d44:2_31.36	1.23102	3.7842e-08	1.5697e-07	0.46703	-1.0984
Cer1P t40:2_26.28	1.15493	4.0379e-08	1.6628e-07	0.19588	-2.352
NAP m17:0_4.27	1.21238	4.1098e-08	1.6884e-07	0.23376	-2.0969
HexCer t46:5_28.15	1.23165	4.1837e-08	1.7146e-07	0.43487	-1.2013
GM4 d37:5_4.32	1.23684	4.2021e-08	1.7178e-07	0.10814	-3.209
Sulfatide d42:0_30.24	1.16974	4.2115e-08	1.7178e-07	0.24576	-2.0247
Cer1P t44:2_29.14	1.21761	4.2457e-08	1.7276e-07	0.29401	-1.7661
GD1 d34:2_18.45	1.13263	4.4167e-08	1.7844e-07	0.39833	-1.328
GT1 d40:1_28.15	1.22484	4.4103e-08	1.7844e-07	0.43208	-1.2106
GM4 t47:1_4.47	1.47094	4.4521e-08	1.7945e-07	14.409	3.8489
Cer d41:1_30.65	1.21185	4.5815e-08	1.8423e-07	0.49795	-1.0059
HexCer t41:3_29.76	1.2445	4.6781e-08	1.8767e-07	0.26933	-1.8925
Cer1P t48:3_32.71	1.18822	4.7257e-08	1.8914e-07	0.19627	-2.3491
HexCer d42:1_31.42	1.20053	4.9937e-08	1.9847e-07	0.25088	-1.9949
GM1 d31:0_4.51	1.2219	5.0918e-08	2.019e-07	0.20245	-2.3044
GA2 d46:3_3.62	1.24166	5.3633e-08	2.1217e-07	4.6453	2.2158
HexCer d43:6_29.72	1.2204	5.5436e-08	2.183e-07	0.26065	-1.9398
Sulfatide d43:3_12.53	1.18117	5.7864e-08	2.2733e-07	5.1223	2.3568
LacCer d50:2_28.96	1.17748	5.8114e-08	2.2779e-07	0.48205	-1.0528
Cer1P t48:4_31.69	1.22875	5.9451e-08	2.325e-07	0.46306	-1.1107
Cer t44:6_31.41	1.19444	5.962e-08	2.3263e-07	0.49005	-1.029
Gb3 d43:5_30.31	1.19261	6.0376e-08	2.3451e-07	0.47198	-1.0832
HexCer t39:5_30.42	1.18418	6.037e-08	2.3451e-07	0.3139	-1.6716
Cer1P t42:2_28.38	1.22515	6.1512e-08	2.38e-07	0.24102	-2.0528
Gg4 d33:1_24.06	1.02598	6.1671e-08	2.38e-07	0.49956	-1.0013
GM1 d36:1_23.76	1.18876	6.1693e-08	2.38e-07	0.41531	-1.2678
HexCer t42:1_28.71	1.22095	7.0482e-08	2.7007e-07	0.48061	-1.0571
HexCer t41:5_5.45	1.3905	7.1096e-08	2.7182e-07	5.0172	2.3269
Cer d44:5_30.67	1.20784	7.3883e-08	2.8059e-07	0.48268	-1.0509
Sulfatide d43:0_33.4	1.16139	7.3863e-08	2.8059e-07	0.46007	-1.1201
Cer m40:6_28.97	1.19715	7.4732e-08	2.8319e-07	0.48242	-1.0516
LacCer t46:4_5.16	1.43296	7.6666e-08	2.8987e-07	13.985	3.8058
Cer m45:7_34.12	1.11819	8.4191e-08	3.1692e-07	0.23791	-2.0715
HexCer t42:4_30.19	1.19898	8.6584e-08	3.2506e-07	0.2934	-1.769
FGM1 t32:2_33.48	1.20419	9.2624e-08	3.4487e-07	0.28147	-1.829
Cer t21:1_3.61	1.19676	9.7763e-08	3.6164e-07	0.21631	-2.2088
GD1 d38:4_23.76	1.17972	1.0745e-07	3.9661e-07	0.41199	-1.2793
GM4 d38:4_31.3	1.20324	1.1459e-07	4.2116e-07	0.45705	-1.1296
HexCer t42:7_26.54	1.21034	1.1669e-07	4.2795e-07	0.36874	-1.4393
Cer1P t48:4_30.77	1.21048	1.291e-07	4.6942e-07	0.27791	-1.8473
LacCer d44:4_5.37	1.4131	1.4141e-07	5.1201e-07	6.1561	2.622
Cer d33:1_23.79	1.17729	1.4929e-07	5.394e-07	0.41266	-1.277
LacCer t39:4_29.59	1.06206	1.5233e-07	5.4921e-07	0.48643	-1.0397
HexCer d31:2_29.19	1.16259	1.5562e-07	5.5991e-07	0.1733	-2.5286
Cer d36:1_23.73	1.16833	1.649e-07	5.9081e-07	0.40123	-1.3175
HexCer d36:1_23.84	1.15668	1.694e-07	6.0564e-07	0.42504	-1.2343
Cer m44:3_31.35	1.20236	1.7791e-07	6.3475e-07	0.47746	-1.0665
HexCer d42:6_28.9	1.18833	1.968e-07	6.9903e-07	0.2293	-2.1247
GM3 d49:0_3.87	1.38803	2.0255e-07	7.1669e-07	11.279	3.4956
Cer1P d32:2_13.22	1.09991	2.1186e-07	7.4809e-07	0.36027	-1.4728
Sulfatide d50:4_4.33	1.44415	2.3653e-07	8.3174e-07	9.7365	3.2834
HexCer d47:6_30.56	1.17048	2.4134e-07	8.4693e-07	0.25094	-1.9946
LacCer d36:0_30.62	1.17185	2.6468e-07	9.2314e-07	0.37617	-1.4105
Gg4 d36:3_24.87	1.20836	2.7636e-07	9.5608e-07	0.48559	-1.0422
LacCer d32:1_22.43	1.12672	3.1751e-07	1.0874e-06	0.36545	-1.4523
Cer t43:4_25.84	1.20441	3.288e-07	1.1238e-06	0.45003	-1.1519
Cer1P t48:2_33	1.16295	3.472e-07	1.182e-06	0.31732	-1.656
Cer1P t46:7_23.03	1.0829	3.5602e-07	1.2096e-06	0.30522	-1.7121
Cer d40:1_29.78	1.13094	3.6348e-07	1.2325e-06	0.4599	-1.1206
LacCer d36:1_24.82	1.20192	3.6434e-07	1.233e-06	0.48873	-1.0329
GA2 d39:1_30.97	1.19789	3.7181e-07	1.2558e-06	0.20022	-2.3203
HexCer t46:4_32.83	1.09473	3.8929e-07	1.3096e-06	0.32868	-1.6053
GD1 t35:0_23.74	1.15924	3.979e-07	1.3334e-06	0.40811	-1.293
LacCer d32:0_23.39	1.12124	4.1251e-07	1.3769e-06	0.46275	-1.1117
Cer1P t48:5_28.66	1.18778	4.4028e-07	1.4639e-06	0.3048	-1.714
Gg4 d36:1_23.75	1.14902	4.4205e-07	1.4641e-06	0.41497	-1.2689
GD1 t38:2_23.8	1.14029	4.5811e-07	1.5114e-06	0.46969	-1.0902
LacCer t39:2_29.45	1.17144	4.9082e-07	1.6162e-06	0.48294	-1.0501
GT3 t33:2_4.23	1.06221	5.0068e-07	1.6392e-06	0.40647	-1.2988
Cer1P t22:0_2.95	1.16646	5.3084e-07	1.7346e-06	0.16627	-2.5884
LacCer d47:2_31.38	1.16264	5.3919e-07	1.7586e-06	0.49707	-1.0085
HexCer d46:3_34.14	1.12879	5.8064e-07	1.8829e-06	0.33852	-1.5627
GM3 d50:0_4.46	1.39951	5.8845e-07	1.9047e-06	8.1186	3.0212
HexCer t38:5_26.11	1.169	5.9396e-07	1.9189e-06	0.31113	-1.6844
Cer1P t46:7_24.41	1.12677	6.094e-07	1.9576e-06	0.27543	-1.8603
Cer d35:2_26.29	1.15693	6.7854e-07	2.1675e-06	0.48513	-1.0436
LacCer d33:1_23.78	1.15246	7.0047e-07	2.2292e-06	0.40812	-1.293
HexCer d44:3_32.36	1.14365	7.2984e-07	2.3141e-06	0.32603	-1.6169
Cer t37:0_28.18	1.16184	9.2117e-07	2.8833e-06	0.4496	-1.1533
Cer1P t47:6_28.11	1.14059	9.3e-07	2.9056e-06	0.38055	-1.3938
GD1 t39:3_11.2	1.09933	1.1818e-06	3.6131e-06	0.37669	-1.4086
Gb3 d35:4_23.32	1.10742	1.1894e-06	3.6298e-06	0.44788	-1.1588
HexCer t31:1_30.77	1.078	1.246e-06	3.7878e-06	0.4039	-1.3079
LacCer t34:1_22.78	1.129	1.2873e-06	3.9007e-06	0.38481	-1.3778
Cer1P t22:0_3.29	1.1519	1.3316e-06	4.0277e-06	0.16424	-2.6061
Cer1P t48:4_30.2	1.11339	1.4318e-06	4.3006e-06	0.2862	-1.8049
Sulfatide t41:4_26.76	1.13791	1.4362e-06	4.3061e-06	0.25792	-1.955
LacCer d46:3_6.49	1.31372	1.508e-06	4.4978e-06	3.7145	1.8932
Sulfatide t42:2_30.75	1.07978	1.6413e-06	4.8713e-06	0.4282	-1.2237
LacCer d38:2_31.19	1.12121	1.6457e-06	4.8743e-06	0.34975	-1.5156
FGM1 t39:4_26.28	1.15273	1.6564e-06	4.8977e-06	0.46267	-1.1119
GT2 t34:1_28.2	1.15466	1.6648e-06	4.9139e-06	0.45777	-1.1273
Cer1P t46:3_29.65	1.14416	1.769e-06	5.2035e-06	0.33908	-1.5603
Gb3 d32:4_29.9	1.07872	1.8605e-06	5.4353e-06	0.46697	-1.0986
GM1 t40:3_26.28	1.14887	1.8683e-06	5.4487e-06	0.451	-1.1488
LacCer d43:4_4.39	1.39546	1.9682e-06	5.7303e-06	6.2052	2.6335
Cer m42:4_30.2	1.06519	1.9736e-06	5.7363e-06	0.41035	-1.2851
Cer1P m41:1_30.59	1.14923	2.019e-06	5.8583e-06	0.33752	-1.567
LacCer t41:0_33.82	1.00124	2.2095e-06	6.3677e-06	0.44486	-1.1686
Sulfatide d41:1_29.72	1.10946	2.2364e-06	6.4343e-06	0.499	-1.0029
LacCer d42:6_28.19	1.14333	2.536e-06	7.2354e-06	0.46503	-1.1046
Sulfatide t40:0_28.92	1.13628	2.6639e-06	7.5751e-06	0.40836	-1.2921
HexCer d43:7_25.92	1.13991	2.7107e-06	7.6954e-06	0.33022	-1.5985
Gg4 d40:2_29.42	1.15639	2.8492e-06	8.0483e-06	0.4844	-1.0457
GD1 d37:0_24.66	1.14331	2.9067e-06	8.1974e-06	0.42363	-1.2391
GM4 d47:1_6.65	1.27108	2.9146e-06	8.206e-06	3.5409	1.8241
Sulfatide d50:0_35.55	1.0396	3.1913e-06	8.8827e-06	0.46509	-1.1044
GD1 d33:6_26.29	1.13482	3.3294e-06	9.2344e-06	0.46186	-1.1145
HexCer d41:7_23.88	1.1054	3.4699e-06	9.5493e-06	0.24327	-2.0394
GA2 d39:3_4.65	1.14731	3.6046e-06	9.8881e-06	2.3558	1.2362
Cer d34:0_25.96	1.13649	3.642e-06	9.9746e-06	0.47666	-1.069
LacCer t39:0_33.81	1.09715	3.9186e-06	1.0698e-05	0.38677	-1.3704
Cer1P t44:5_24.56	1.11711	3.9781e-06	1.0843e-05	0.32896	-1.604
Cer1P t46:3_29.63	1.1277	4.2799e-06	1.161e-05	0.37471	-1.4162
HexCer d40:2_31.7	0.997543	4.3911e-06	1.1874e-05	2.0511	1.0364
Gb3 d42:1_30.97	1.12477	4.4161e-06	1.1923e-05	0.28113	-1.8307
GD1 d42:4_28.22	1.11422	4.9607e-06	1.3267e-05	0.48278	-1.0506
GM3 t43:4_24.68	1.13118	5.1173e-06	1.3644e-05	0.43316	-1.207
GM2 d48:5_5.17	1.14197	5.1756e-06	1.3756e-05	0.18459	-2.4376
Cer1P t45:6_27.26	1.11727	5.2798e-06	1.4011e-05	0.47455	-1.0754
LacCer t45:6_24.69	1.14317	5.8234e-06	1.5358e-05	0.41958	-1.253
GD1 t34:5_24.68	1.12456	5.9613e-06	1.5682e-05	0.42425	-1.237
HexCer d40:5_28.49	1.11967	6.0039e-06	1.574e-05	0.31077	-1.6861
HexCer d42:2_29.48	1.08901	6.3813e-06	1.6625e-05	0.46877	-1.093
GM2 d36:0_25.99	1.13966	6.5631e-06	1.7072e-05	0.46724	-1.0978
HexCer t44:3_28.24	1.10832	6.7755e-06	1.7598e-05	0.49012	-1.0288
Cer1P m39:0_30.52	1.11565	6.8973e-06	1.7887e-05	0.39112	-1.3543
Cer1P t48:7_25.9	1.11958	7.4984e-06	1.9358e-05	0.35394	-1.4984
Cer1P d34:1_13.32	0.93591	7.7156e-06	1.9888e-05	0.40909	-1.2895
GD1 t36:0_23.69	1.07476	7.7834e-06	2.0033e-05	0.4505	-1.1504
Cer1P t25:0_13.73	1.04259	7.9886e-06	2.053e-05	0.34319	-1.5429
GT3 d33:0_24.66	1.1137	8.0966e-06	2.0777e-05	0.44917	-1.1547
Cer1P t46:6_25.85	1.10243	8.3891e-06	2.1463e-05	0.34479	-1.5362
HexCer d41:7_26.91	1.06251	8.7657e-06	2.2392e-05	0.36507	-1.4537
Sulfatide t42:4_25.94	1.12291	9.2483e-06	2.3485e-05	0.48585	-1.0414
GD1 d40:6_24.7	1.1264	9.6279e-06	2.4304e-05	0.44421	-1.1707
GD1 d31:2_26.27	1.11396	1e-05	2.5207e-05	0.48936	-1.031
GM4 t49:3_5.54	0.997105	1.03e-05	2.5885e-05	2.0911	1.0642
Cer1P t48:6_28.07	1.09195	1.0543e-05	2.6419e-05	0.37589	-1.4116
HexCer d48:7_33.73	0.972699	1.0899e-05	2.7231e-05	0.19795	-2.3368
Cer1P t46:7_25.44	1.06652	1.0954e-05	2.7328e-05	0.43325	-1.2067
Cer d33:0_24.7	1.11981	1.2532e-05	3.1129e-05	0.45075	-1.1496
HexCer d46:4_32.18	1.0346	1.2575e-05	3.1185e-05	0.30829	-1.6977
Gb3 d49:3_5.15	1.34747	1.4951e-05	3.6711e-05	4.4594	2.1569
LacCer t45:4_4.11	1.33542	1.5599e-05	3.8194e-05	4.2552	2.0892
GM3 d43:2_30.37	1.05665	1.5637e-05	3.8232e-05	0.49002	-1.0291
Cer m40:4_28.22	1.1083	1.6588e-05	4.044e-05	0.47255	-1.0815
Cer d39:2_23.63	1.05183	2.0286e-05	4.876e-05	0.45378	-1.1399
Cer1P t45:3_29.54	1.09436	2.1393e-05	5.1163e-05	0.38719	-1.3689
Cer m45:7_33.62	0.98186	2.1613e-05	5.1588e-05	0.49038	-1.028
Cer1P t21:1_3.45	0.927257	2.4413e-05	5.8026e-05	0.45636	-1.1317
LacCer t44:5_24.66	1.0708	2.5741e-05	6.0911e-05	0.4831	-1.0496
GD1 d38:3_24.7	1.09392	3.0094e-05	7.0743e-05	0.46291	-1.1112
Cer1P t42:1_50.78	0.903673	3.0709e-05	7.1893e-05	0.24928	-2.0042
Cer t31:1_20.34	1.05269	3.1283e-05	7.3136e-05	0.34101	-1.5521
Sulfatide d42:0_34.61	0.984845	3.6377e-05	8.4583e-05	2.0418	1.0299
Sulfatide d39:1_29.72	1.00379	3.8124e-05	8.8525e-05	0.47209	-1.0829
Cer t33:1_23.22	1.07135	4.5494e-05	0.00010521	0.39025	-1.3575
HexCer d45:3_33.27	0.997864	5.2906e-05	0.0001212	0.42824	-1.2235
Cer t45:4_13.96	0.993184	5.7826e-05	0.00013212	0.44133	-1.1801
HexCer d39:5_29.42	0.99294	6.281e-05	0.00014274	0.011394	-6.4556
Cer1P t44:6_24	1.0566	7.1969e-05	0.00016205	0.36429	-1.4569
HexCer t45:5_33.02	0.927774	7.2139e-05	0.00016222	0.4999	-1.0003
HexCer d38:6_24.39	1.05305	7.9757e-05	0.00017864	0.41201	-1.2793
HexCer d44:4_31.43	0.996358	8.3941e-05	0.00018777	0.46921	-1.0917
HexCer d33:2_23.71	0.991529	8.8874e-05	0.00019854	0.49062	-1.0273
GM2 d36:0_24.72	1.06974	9.891e-05	0.00021905	0.4677	-1.0963
HexCer t41:2_31.59	1.01528	9.8872e-05	0.00021905	0.43339	-1.2062
GM1 t33:0_5.32	1.06037	0.00013217	0.00028737	0.26806	-1.8994
Cer1P t48:1_34.15	0.866163	0.00020105	0.00043111	0.45406	-1.139
Cer1P t38:3_4.06	1.07579	0.00023536	0.00049781	2.5891	1.3724
Cer m34:1_34.3	0.863146	0.00025427	0.00053515	2.8929	1.5325
GD3 t32:0_5.4	1.03153	0.00028287	0.00059242	0.33042	-1.5976
Cer1P t44:2_50.78	0.805488	0.00030177	0.00062816	0.37903	-1.3996
GD3 d43:2_5.09	1.03179	0.00030293	0.00062981	0.19429	-2.3637
GM3 d48:2_4.47	1.00306	0.0003415	0.00070147	0.28818	-1.795
Cer m43:4_35.62	0.864968	0.0005285	0.0010638	4.8923	2.2905
Sulfatide t38:3_26.29	0.937303	0.00054647	0.0010962	0.41135	-1.2816
Cer1P m38:2_30.19	0.957896	0.00070565	0.0013942	0.38411	-1.3804
HexCer d34:1_23.27	0.933953	0.00084736	0.001655	0.45114	-1.1484
Cer m35:0_31.94	0.887803	0.0009314	0.0018015	20.532	4.3598
HexCer d39:7_24.31	0.919689	0.0010487	0.0020122	0.49215	-1.0228
Cer t36:2_18.22	0.575936	0.0010671	0.0020444	0.30538	-1.7113
HexCer d38:5_26.26	0.956901	0.0011743	0.0022349	0.39828	-1.3281
HexCer d44:4_30.16	0.884189	0.001232	0.002325	0.43443	-1.2028
Cer1P m41:1_30.36	0.943078	0.0013043	0.0024522	0.46342	-1.1096
Cer t21:1_5.06	1.00855	0.0016359	0.0030455	0.33551	-1.5756
LacCer t48:3_6.14	1.2938	0.0018664	0.0034445	3.1889	1.673
Cer1P t44:5_26.14	0.763536	0.002116	0.0038635	0.27282	-1.874
FGM1 t34:0_5.01	0.992373	0.0021199	0.0038665	0.22081	-2.1791
Cer1P d41:0_30.93	0.947931	0.0022418	0.0040714	0.43784	-1.1915
GM4 d46:1_5.67	1.18549	0.0024615	0.0044328	2.3448	1.2295
Cer t20:1_2.5	0.930435	0.002466	0.0044362	0.30871	-1.6957
Cer1P t48:4_50.8	0.702427	0.0024974	0.004487	0.42429	-1.2369
Cer1P m40:0_32.46	0.899756	0.0026371	0.004693	0.45727	-1.1289
Cer m33:0_29.8	0.864145	0.0027103	0.0048099	20.66	4.3687
Cer m37:0_33.9	0.837542	0.0030783	0.0054348	15.129	3.9192
LacCer d43:6_4.53	0.945565	0.0042071	0.0073069	0.32776	-1.6093
GM3 d31:1_5.36	0.933698	0.0042317	0.0073421	0.035896	-4.8001
Cer m34:0_30.9	0.863465	0.0055541	0.0094632	5.5534	2.4734
Cer t45:6_33.81	0.787635	0.0055594	0.0094632	0.084157	-3.5708
GM4 d45:2_5.57	0.917177	0.0065957	0.011138	0.44859	-1.1565
Cer m42:4_21.21	0.606214	0.0093213	0.015436	0.49084	-1.0267
Cer1P d37:6_4.23	0.91598	0.011284	0.018597	0.37178	-1.4275
GM4 d36:4_3.94	0.935883	0.012019	0.019675	0.096185	-3.378
Cer1P t43:2_29.42	0.694024	0.017491	0.027819	2.0377	1.027
Cer d44:5_34.76	0.741953	0.021145	0.033275	2.0765	1.0541
NAP m18:2_2.01	0.486116	0.023766	0.036992	2.5097	1.3275

## Sheet:  Aden vs Squa vs SCLC
985 differential glycosphingolipids (FDR<0.05) among Aden, Squa and SCLC in one-way ANOVA analysis
Name	Average value (Z-scored)			Class	Cluster (C-means clustering )
	Aden	Squa	SCLC
Cer d32:1_22.44	-0.168284	-0.32421	0.7339	Cer	1
Cer d33:0_24.7	-0.16519	-0.271374	0.660748	Cer	1
Cer d33:1_23.79	-0.165095	-0.236638	0.616357	Cer	1
Cer d33:3_22.18	-0.167947	-0.202794	0.578728	Cer	1
Cer d34:3_22.15	-0.179771	-0.182907	0.575989	Cer	1
Cer d41:0_31.3	-0.158509	-0.273773	0.651048	Cer	1
Cer d42:2_29.48	-0.187928	-0.269109	0.701274	Cer	1
Cer m27:0_28.95	-0.179549	-0.307516	0.734161	Cer	1
Cer m40:2_29.68	-0.221231	-0.242718	0.731265	Cer	1
Cer m40:4_28.22	-0.22153	-0.225175	0.709507	Cer	1
Cer m44:3_31.35	-0.160938	-0.264966	0.644475	Cer	1
Cer t31:1_20.34	-0.164173	-0.225867	0.600888	Cer	1
Cer t33:1_23.22	-0.166224	-0.188289	0.556977	Cer	1
Cer t34:0_24.85	-0.155204	-0.323041	0.70744	Cer	1
Cer t37:0_22.18	-0.167662	-0.203198	0.578699	Cer	1
Cer t37:1_29.81	-0.153717	-0.275949	0.644666	Cer	1
Cer t42:0_29.75	-0.161256	-0.26993	0.6514	Cer	1
Cer t43:4_25.84	-0.167501	-0.261072	0.652048	Cer	1
Cer t44:6_31.41	-0.197082	-0.183658	0.609994	Cer	1
Cer1P d24:0_5.41	-0.158594	-0.215328	0.576824	Cer	1
Cer1P d29:1_24.31	-0.183268	-0.319299	0.756257	Cer	1
Cer1P d30:0_14.98	-0.168486	-0.329512	0.741034	Cer	1
Cer1P d32:0_19.17	-0.178477	-0.329298	0.759835	Cer	1
Cer1P d34:1_19.84	-0.203212	-0.324137	0.800488	Cer	1
Cer1P d35:1_24.01	-0.160136	-0.211833	0.575321	Cer	1
Cer1P d48:2_31.78	-0.170531	-0.275174	0.675781	Cer	1
Cer1P d48:5_29.76	-0.23735	-0.259868	0.783865	Cer	1
Cer1P t21:0_3.28	-0.206638	-0.299414	0.775563	Cer	1
Cer1P t21:0_6.02	-0.17097	-0.330014	0.746416	Cer	1
Cer1P t22:0_2.95	-0.214944	-0.318337	0.815505	Cer	1
Cer1P t22:0_3.29	-0.190274	-0.323775	0.775328	Cer	1
Cer1P t22:0_7.96	-0.177409	-0.324344	0.751491	Cer	1
Cer1P t24:0_5.2	-0.160881	-0.289873	0.676065	Cer	1
Cer1P t24:0_7.69	-0.148915	-0.293244	0.657512	Cer	1
Cer1P t26:0_8.85	-0.16183	-0.260215	0.640131	Cer	1
Cer1P t26:0_9.67	-0.160139	-0.276275	0.657343	Cer	1
Cer1P t26:1_5.87	-0.218324	-0.293017	0.789731	Cer	1
Cer1P t26:2_3.99	-0.253136	-0.239533	0.78812	Cer	1
Cer1P t28:0_13.31	-0.167937	-0.261991	0.654051	Cer	1
Cer1P t28:1_9.37	-0.196357	-0.266147	0.713596	Cer	1
Cer1P t28:3_5.36	-0.146669	-0.29886	0.660371	Cer	1
Cer1P t28:3_6.17	-0.168118	-0.26795	0.661981	Cer	1
Cer1P t30:0_17.31	-0.172047	-0.239543	0.633325	Cer	1
Cer1P t40:0_28.61	-0.194744	-0.329971	0.791746	Cer	1
Cer1P t40:2_24.56	-0.121478	-0.165241	0.442219	Cer	1
Cer1P t40:2_26.13	-0.169174	-0.30909	0.716354	Cer	1
Cer1P t40:3_27.95	-0.126324	-0.244291	0.552079	Cer	1
Cer1P t41:0_27.93	-0.168438	-0.305593	0.7105	Cer	1
Cer1P t42:0_30.7	-0.23132	-0.252113	0.762481	Cer	1
Cer1P t42:1_28.64	-0.168813	-0.32873	0.740663	Cer	1
Cer1P t42:2_26.95	-0.141115	-0.281192	0.627282	Cer	1
Cer1P t42:3_28.65	-0.201742	-0.271796	0.731065	Cer	1
Cer1P t44:5_24.29	-0.156668	-0.240194	0.604794	Cer	1
Cer1P t44:6_24	-0.168705	-0.247512	0.637089	Cer	1
Cer1P t45:3_29.54	-0.245488	-0.256336	0.794904	Cer	1
Cer1P t46:0_32.48	-0.176361	-0.276359	0.688418	Cer	1
Cer1P t46:3_29.63	-0.20211	-0.3053	0.77441	Cer	1
Cer1P t46:3_29.65	-0.206087	-0.292274	0.765424	Cer	1
Cer1P t46:3_30.4	-0.208051	-0.186542	0.634605	Cer	1
Cer1P t46:6_25.01	-0.205807	-0.25028	0.711443	Cer	1
Cer1P t46:6_25.85	-0.177069	-0.281112	0.69582	Cer	1
Cer1P t46:7_23.03	-0.176024	-0.230781	0.629768	Cer	1
Cer1P t47:6_28.11	-0.18769	-0.19931	0.611985	Cer	1
Cer1P t48:0_32.51	-0.21189	-0.189037	0.645111	Cer	1
Cer1P t48:1_34.15	-0.19961	-0.369745	0.851658	Cer	1
Cer1P t48:2_33	-0.192521	-0.309721	0.76173	Cer	1
Cer1P t48:4_30.2	-0.204388	-0.2817	0.748723	Cer	1
Cer1P t48:4_30.77	-0.1785	-0.298711	0.72095	Cer	1
Cer1P t48:5_28.14	-0.193526	-0.284144	0.731097	Cer	1
Cer1P t48:5_28.66	-0.189052	-0.307083	0.75175	Cer	1
Cer1P t48:6_28.07	-0.232631	-0.234201	0.742188	Cer	1
Cer1P t48:7_25.9	-0.169334	-0.303395	0.709413	Cer	1
FGM1 t30:3_29.67	-0.150734	-0.158213	0.489128	FGM1	1
FGM1 t44:4_28.05	-0.199468	-0.227413	0.670238	FGM1	1
GA2 d32:1_5.2	-0.126113	-0.199135	0.494207	GA2	1
GA2 d39:1_30.97	-0.157375	-0.245671	0.613116	GA2	1
GA2 t30:0_30.7	-0.234728	-0.25688	0.775056	GA2	1
GA2 t33:2_6.55	-0.127677	-0.194426	0.491198	GA2	1
GA2 t34:3_32.47	-0.260601	-0.311968	0.894561	GA2	1
Gb3 d30:3_29.51	-0.190506	-0.272418	0.710409	Gb3	1
Gb3 d30:4_29.53	-0.27057	-0.247902	0.832054	Gb3	1
Gb3 d32:2_32.56	-0.229972	-0.203098	0.697526	Gb3	1
Gb3 d34:4_5.83	-0.140756	-0.264745	0.605665	Gb3	1
Gb3 d37:4_25.84	-0.196733	-0.283685	0.736634	Gb3	1
Gb3 d37:5_30.82	-0.26261	-0.233547	0.798588	Gb3	1
Gb3 d42:1_32.45	-0.20307	-0.268879	0.729888	Gb3	1
Gb3 t35:3_32.46	-0.281175	-0.300616	0.919392	Gb3	1
Gb3 t35:5_31.3	-0.174479	-0.186465	0.570416	Gb3	1
Gb3 t36:2_6.51	-0.107565	-0.155485	0.403241	Gb3	1
Gb3 t36:3_4.36	-0.12908	-0.139153	0.423529	Gb3	1
Gb3 t41:1_31.25	-0.133967	-0.249814	0.5737	Gb3	1
GD1 d38:3_24.7	-0.171362	-0.28816	0.693896	GD1	1
GD1 d38:4_23.76	-0.162473	-0.226418	0.598345	GD1	1
GD1 d40:6_24.7	-0.147768	-0.254131	0.605542	GD1	1
GD1 d42:1_28.02	-0.172725	-0.325015	0.743404	GD1	1
GD1 d42:4_28.22	-0.227431	-0.254517	0.758117	GD1	1
GD1 t32:6_22.39	-0.115091	-0.243191	0.529236	GD1	1
GD1 t38:2_23.8	-0.234519	-0.356594	0.901566	GD1	1
GD2 d36:0_23.9	-0.232193	-0.34826	0.886517	GD2	1
GD2 t31:1_32.57	-0.180976	-0.206591	0.608434	GD2	1
GD2 t39:0_24.74	-0.156404	-0.253146	0.620775	GD2	1
GD3 d38:4_24.84	-0.169323	-0.334883	0.749468	GD3	1
GD3 t39:2_24.96	-0.18692	-0.241592	0.664327	GD3	1
Gg4 d36:3_24.87	-0.183739	-0.317944	0.755431	Gg4	1
Gg4 d40:2_29.42	-0.158455	-0.294631	0.677491	Gg4	1
GM1 d36:1_23.76	-0.174392	-0.225679	0.620157	GM1	1
GM1 d36:4_27.8	-0.190709	-0.207365	0.628001	GM1	1
GM1 d37:4_23.8	-0.16906	-0.238327	0.626075	GM1	1
GM1 t35:2_27.81	-0.12968	-0.255423	0.572655	GM1	1
GM1 t40:0_4.33	-0.115552	-0.211651	0.489974	GM1	1
GM2 d36:0_25.99	-0.17397	-0.303585	0.718505	GM2	1
GM2 d50:0_23.93	-0.143411	-0.229265	0.565575	GM2	1
GM3 d43:2_30.37	-0.170737	-0.322255	0.736096	GM3	1
GM4 d35:3_4.39	-0.132255	-0.24805	0.568187	GM4	1
GM4 d36:0_30.46	-0.193164	-0.307757	0.760458	GM4	1
GM4 d36:0_30.8	-0.300396	-0.299905	0.955181	GM4	1
GM4 d38:5_5.75	-0.132721	-0.250525	0.572227	GM4	1
GM4 d45:2_5.57	-0.16881	-0.241855	0.630089	GM4	1
GM4 t47:5_31.27	-0.166549	-0.194915	0.566032	GM4	1
GT1 d40:1_28.15	-0.225409	-0.236538	0.731374	GT1	1
GT2 t34:1_28.2	-0.226404	-0.20449	0.692485	GT2	1
GT3 t41:1_26.1	-0.14513	-0.301458	0.660741	GT3	1
HexCer d36:1_23.84	-0.214306	-0.220046	0.689189	HexCer	1
HexCer d36:5_28.23	-0.193128	-0.284286	0.730519	HexCer	1
HexCer d38:5_26.26	-0.183476	-0.334951	0.776574	HexCer	1
HexCer d39:7_23.94	-0.133766	-0.139023	0.43231	HexCer	1
HexCer d39:7_24.31	-0.146245	-0.256178	0.605239	HexCer	1
HexCer d40:5_28.49	-0.226414	-0.316354	0.834877	HexCer	1
HexCer d41:7_23.88	-0.145296	-0.257822	0.60552	HexCer	1
HexCer d41:7_26.91	-0.214473	-0.279835	0.765602	HexCer	1
HexCer d42:1_31.42	-0.180461	-0.212198	0.614586	HexCer	1
HexCer d42:6_28.9	-0.195906	-0.219252	0.653051	HexCer	1
HexCer d43:6_28.11	-0.194645	-0.277339	0.724572	HexCer	1
HexCer d43:7_25.92	-0.167604	-0.30035	0.702235	HexCer	1
HexCer d44:2_31.36	-0.156518	-0.294304	0.673376	HexCer	1
HexCer d44:5_32.66	-0.18318	-0.183685	0.583488	HexCer	1
HexCer d45:4_31.61	-0.1731	-0.292319	0.702506	HexCer	1
HexCer d47:6_30.56	-0.187072	-0.260792	0.689053	HexCer	1
HexCer t37:4_23.94	-0.13268	-0.150364	0.444671	HexCer	1
HexCer t38:4_28.88	-0.150304	-0.24035	0.592843	HexCer	1
HexCer t41:0_31.42	-0.209031	-0.232822	0.695377	HexCer	1
HexCer t41:0_31.75	-0.17798	-0.313047	0.738204	HexCer	1
HexCer t41:3_29.76	-0.237819	-0.259668	0.784505	HexCer	1
HexCer t42:2_33.45	-0.196968	-0.273246	0.723797	HexCer	1
HexCer t42:4_30.19	-0.181201	-0.306252	0.735704	HexCer	1
HexCer t44:3_28.24	-0.225589	-0.255657	0.756051	HexCer	1
HexCer t44:5_30.79	-0.2881	-0.308885	0.943136	HexCer	1
HexCer t46:5_28.15	-0.212279	-0.259421	0.735432	HexCer	1
LacCer d32:1_22.43	-0.177775	-0.353772	0.789643	LacCer	1
LacCer d36:0_30.62	-0.270831	-0.288099	0.883713	LacCer	1
LacCer d36:1_24.82	-0.170665	-0.330168	0.746029	LacCer	1
LacCer d41:6_31.15	-0.165373	-0.336645	0.74417	LacCer	1
LacCer d42:6_28.19	-0.222902	-0.213125	0.69679	LacCer	1
LacCer d43:4_32.47	-0.19939	-0.252738	0.70232	LacCer	1
LacCer d47:2_31.38	-0.216561	-0.317218	0.817167	LacCer	1
LacCer t33:2_24.02	-0.239853	-0.352662	0.906743	LacCer	1
LacCer t35:2_31.46	-0.110592	-0.198185	0.463365	LacCer	1
LacCer t38:0_30.81	-0.220573	-0.273024	0.768579	LacCer	1
LacCer t39:0_33.81	-0.188104	-0.243941	0.669578	LacCer	1
NAP d28:5_22.2	-0.180024	-0.207477	0.607745	NAP	1
Sulfatide d40:0_30.4	-0.247253	-0.260544	0.80363	Sulfatide	1
Sulfatide d43:1_31.12	-0.160896	-0.268882	0.649378	Sulfatide	1
Sulfatide d43:1_32.42	-0.128619	-0.253976	0.568789	Sulfatide	1
Sulfatide d44:3_31.48	-0.170975	-0.28775	0.692635	Sulfatide	1
Sulfatide d46:2_31.24	-0.19016	-0.217137	0.639389	Sulfatide	1
Sulfatide d46:4_32.59	-0.196447	-0.21461	0.648175	Sulfatide	1
Sulfatide d50:0_35.55	-0.144922	-0.184463	0.51144	Sulfatide	1
Sulfatide t40:0_28.92	-0.257035	-0.243592	0.80073	Sulfatide	1
Sulfatide t41:0_31.42	-0.172486	-0.290366	0.698848	Sulfatide	1
Sulfatide t41:4_26.76	-0.19493	-0.233618	0.66947	Sulfatide	1
Sulfatide t42:4_25.94	-0.148345	-0.288988	0.651007	Sulfatide	1
Sulfatide t43:3_29.85	-0.128936	-0.259128	0.57595	Sulfatide	1
Sulfatide t44:1_31.21	-0.165107	-0.306164	0.704868	Sulfatide	1
Sulfatide t44:3_31.31	-0.157629	-0.264716	0.637839	Sulfatide	1
Sulfatide t45:4_30.8	-0.315311	-0.277076	0.954599	Sulfatide	1
Cer d22:1_2.43	0.457692	-0.460462	-0.287734	Cer	2
Cer d26:1_23.29	0.711068	-0.705745	-0.459272	Cer	2
Cer d36:1_34.18	0.757196	-0.817038	-0.40569	Cer	2
Cer d36:1_34.98	0.182645	-0.25379	-0.0256801	Cer	2
Cer d37:0_29.94	0.729567	-0.765514	-0.418519	Cer	2
Cer d37:0_35.39	0.572888	-0.622433	-0.301508	Cer	2
Cer d41:3_31.92	0.492353	-0.626786	-0.142219	Cer	2
Cer d44:1_34.35	0.252863	-0.314529	-0.08243	Cer	2
Cer d46:2_36.58	0.29292	-0.346202	-0.118591	Cer	2
Cer m23:1_20.88	0.809364	-0.815086	-0.507766	Cer	2
Cer m24:0_20.21	0.642248	-0.773214	-0.242019	Cer	2
Cer m31:0_30.31	0.742638	-0.807257	-0.390345	Cer	2
Cer m32:0_35.49	0.697396	-0.685286	-0.459212	Cer	2
Cer m33:0_30.47	0.572425	-0.75372	-0.133532	Cer	2
Cer m33:0_32.47	0.756637	-0.733553	-0.510877	Cer	2
Cer m33:1_30.89	0.381894	-0.401673	-0.21785	Cer	2
Cer m34:1_35.38	0.552336	-0.559565	-0.342287	Cer	2
Cer m35:0_29	0.351785	-0.506667	-0.0267404	Cer	2
Cer m35:0_34.41	0.658201	-0.648123	-0.431681	Cer	2
Cer m36:0_30.11	0.364448	-0.464876	-0.104103	Cer	2
Cer m36:0_33.51	0.700122	-0.722123	-0.417531	Cer	2
Cer m36:1_33.15	0.405291	-0.445434	-0.206823	Cer	2
Cer m36:1_37.14	0.443255	-0.477249	-0.238806	Cer	2
Cer m36:3_28.69	0.382464	-0.469739	-0.132309	Cer	2
Cer m37:0_29.75	0.801804	-0.822469	-0.483937	Cer	2
Cer m37:1_36.59	0.528208	-0.641723	-0.191658	Cer	2
Cer m38:0_33.29	0.744125	-0.809897	-0.389825	Cer	2
Cer m38:3_30.88	0.315205	-0.314319	-0.201712	Cer	2
Cer m39:0_35.58	0.477782	-0.554375	-0.206562	Cer	2
Cer m39:1_35.05	0.353379	-0.392559	-0.175011	Cer	2
Cer m39:3_30.45	0.525267	-0.667097	-0.153751	Cer	2
Cer m39:3_33.34	0.392103	-0.49689	-0.116154	Cer	2
Cer m40:0_35.11	0.837638	-0.815374	-0.561378	Cer	2
Cer m40:0_40.21	0.18628	-0.248569	-0.0392658	Cer	2
Cer m40:1_35.87	0.407812	-0.41636	-0.248637	Cer	2
Cer m42:1_29.88	0.613251	-0.706443	-0.271643	Cer	2
Cer m42:2_37.15	0.266963	-0.259196	-0.179771	Cer	2
Cer m42:3_31.95	0.342725	-0.376515	-0.175091	Cer	2
Cer m43:0_37.06	0.261143	-0.334455	-0.0728743	Cer	2
Cer m44:2_35.57	0.173331	-0.194568	-0.0832727	Cer	2
Cer m46:3_37.63	0.233823	-0.264225	-0.110103	Cer	2
Cer t34:4_12.91	0.193171	-0.196035	-0.119282	Cer	2
Cer t35:0_33.26	0.612344	-0.710513	-0.26473	Cer	2
Cer t37:0_35.08	0.625651	-0.615205	-0.411437	Cer	2
Cer t42:0_31.85	0.620521	-0.876432	-0.0691725	Cer	2
Cer t42:2_29.13	0.171115	-0.213713	-0.0546748	Cer	2
Cer t44:1_35.64	0.141095	-0.166566	-0.0573696	Cer	2
Cer t44:2_35.03	0.232613	-0.285454	-0.0807749	Cer	2
Cer t44:6_30.85	0.268687	-0.337191	-0.0837959	Cer	2
Cer t45:3_33.99	0.582653	-0.561443	-0.397773	Cer	2
Cer t45:3_36.77	0.369094	-0.397474	-0.198759	Cer	2
Cer t46:1_37.13	0.279817	-0.275561	-0.183481	Cer	2
Cer t47:2_35.96	0.29727	-0.332415	-0.144442	Cer	2
Cer t47:2_37.3	0.260571	-0.255301	-0.172525	Cer	2
Cer t47:6_31.9	0.587453	-0.684834	-0.249894	Cer	2
Cer1P d48:4_35.86	0.26325	-0.342325	-0.0668825	Cer	2
Cer1P m20:1_12.06	0.123484	-0.140039	-0.0575112	Cer	2
Cer1P m45:1_29.91	0.733725	-0.803816	-0.37771	Cer	2
Cer1P m46:2_31.86	0.678719	-0.669648	-0.443457	Cer	2
Cer1P m48:3_31.95	0.337302	-0.345112	-0.204707	Cer	2
Cer1P t34:1_29.02	0.444488	-0.477494	-0.240848	Cer	2
Cer1P t44:1_29.16	0.162772	-0.164135	-0.101848	Cer	2
Cer1P t44:1_30.41	0.224866	-0.230391	-0.136064	Cer	2
Cer1P t46:1_34.11	0.481968	-0.584066	-0.176764	Cer	2
Cer1P t47:2_31.85	0.713989	-0.685779	-0.49026	Cer	2
Cer1P t48:3_34.33	0.206189	-0.266946	-0.0538834	Cer	2
GA2 t42:0_25.66	0.450991	-0.577505	-0.125977	GA2	2
Gb3 d31:2_17.95	0.739558	-0.712967	-0.504471	Gb3	2
Gb3 d40:3_30.02	0.653871	-0.657672	-0.411261	Gb3	2
Gb3 d43:5_30.06	0.422588	-0.581328	-0.0668874	Gb3	2
Gb3 d43:5_30.31	0.446491	-0.622359	-0.0602987	Gb3	2
Gb3 d47:6_30.02	0.463445	-0.556787	-0.176122	Gb3	2
Gb3 d48:6_24.09	0.297286	-0.408213	-0.0480024	Gb3	2
Gb3 t43:1_34.33	0.206166	-0.29056	-0.0237855	Gb3	2
GD1 d48:6_9.34	0.547255	-0.575884	-0.311817	GD1	2
GD2 d45:1_8.3	0.441557	-0.47216	-0.24204	GD2	2
GD2 t45:1_27.87	0.496623	-0.635886	-0.138789	GD2	2
GD2 t47:1_8.18	0.348383	-0.463691	-0.0749425	GD2	2
GD3 t38:4_11.34	0.349175	-0.350332	-0.220729	GD3	2
Gg4 d35:3_10.8	0.14419	-0.137836	-0.0998449	Gg4	2
Gg4 d35:3_33.03	0.236513	-0.262742	-0.117125	Gg4	2
Gg4 d40:2_29.17	0.175357	-0.218248	-0.0570012	Gg4	2
GM1 t30:3_8.19	0.294075	-0.337974	-0.131267	GM1	2
GM1 t42:4_11.21	0.278548	-0.299207	-0.150964	GM1	2
GM3 d45:1_2.1	0.428188	-0.532561	-0.139644	GM3	2
GM4 d40:6_30.47	0.693547	-0.838265	-0.257161	GM4	2
GM4 d41:4_34.05	0.618111	-0.612678	-0.400258	GM4	2
GM4 t50:3_5.35	0.301471	-0.292414	-0.203371	GM4	2
GT3 t33:2_4.23	0.371136	-0.473709	-0.105631	GT3	2
GT3 t41:2_12.29	0.393849	-0.532943	-0.0736028	GT3	2
HexCer d35:3_30.92	0.168273	-0.19818	-0.0690191	HexCer	2
HexCer d44:5_35.58	0.221794	-0.249834	-0.105454	HexCer	2
HexCer d46:2_35.36	0.24269	-0.259559	-0.132969	HexCer	2
HexCer d46:2_36.73	0.498155	-0.519087	-0.290366	HexCer	2
HexCer t43:0_35.05	0.280142	-0.318204	-0.129831	HexCer	2
HexCer t45:2_34.18	0.29396	-0.348763	-0.117315	HexCer	2
HexCer t45:5_30.1	0.451774	-0.631096	-0.0592635	HexCer	2
HexCer t46:4_33.86	0.358733	-0.373736	-0.20919	HexCer	2
HexCer t46:4_34.06	0.516398	-0.563311	-0.268909	HexCer	2
HexCer t47:5_34.2	0.23554	-0.303597	-0.0632714	HexCer	2
HexCer t48:4_36.73	0.461813	-0.514655	-0.226628	HexCer	2
LacCer d38:0_26.95	0.225857	-0.318993	-0.0251906	LacCer	2
LacCer d40:1_30.07	0.62887	-0.684052	-0.329959	LacCer	2
LacCer d47:3_37.62	0.213965	-0.273609	-0.060249	LacCer	2
LacCer t32:5_25.5	0.432348	-0.45823	-0.242189	LacCer	2
LacCer t33:4_27.24	0.316633	-0.328397	-0.186522	LacCer	2
LacCer t41:2_29.96	0.762984	-0.77225	-0.473743	LacCer	2
NAP t26:5_10.77	0.360427	-0.440265	-0.12775	NAP	2
Sulfatide d41:0_34.41	0.236893	-0.323764	-0.0401867	Sulfatide	2
Sulfatide d43:0_33.4	0.191929	-0.235928	-0.0661386	Sulfatide	2
Cer d21:1_15.38	0.0263965	-0.283259	0.310119	Cer	3
Cer d27:1_9.69	-0.125921	-0.302522	0.625423	Cer	3
Cer d34:0_25.96	-0.140135	-0.308322	0.659939	Cer	3
Cer d35:2_26.29	-0.0996997	-0.339053	0.621858	Cer	3
Cer d37:3_25.36	-0.0792726	-0.301053	0.534497	Cer	3
Cer d38:1_26.09	-0.128321	-0.332835	0.668584	Cer	3
Cer d40:1_28.35	-0.121893	-0.292901	0.605488	Cer	3
Cer d40:1_29.78	-0.0384306	-0.257887	0.401587	Cer	3
Cer d42:1_31.54	-0.0616026	-0.378816	0.599734	Cer	3
Cer d42:2_26.08	-0.118817	-0.335543	0.653888	Cer	3
Cer m34:2_25.01	-0.0941674	-0.352445	0.62834	Cer	3
Cer m34:3_22.78	-0.120864	-0.294344	0.605359	Cer	3
Cer m36:2_25.42	-0.0367368	-0.417507	0.601506	Cer	3
Cer m37:3_29.8	-0.135262	-0.294093	0.632528	Cer	3
Cer m41:3_28.61	-0.102084	-0.32972	0.614532	Cer	3
Cer t20:1_2.5	-0.0321	-0.307006	0.452016	Cer	3
Cer t21:1_3.61	-0.0650955	-0.32882	0.542771	Cer	3
Cer t21:1_5.06	-0.0106604	-0.436756	0.576223	Cer	3
Cer t23:1_6.2	-0.0759323	-0.325657	0.559434	Cer	3
Cer t25:1_9.68	-0.0859794	-0.343982	0.601937	Cer	3
Cer t39:1_31.84	-0.13472	-0.299012	0.637754	Cer	3
Cer t39:4_29.83	-0.0860577	-0.344424	0.60265	Cer	3
Cer t41:2_31.63	0.016283	-0.47056	0.567809	Cer	3
Cer t43:3_25.45	0.0550542	-0.443445	0.459281	Cer	3
Cer t44:3_31.62	-0.0269368	-0.443607	0.616016	Cer	3
Cer1P d23:0_11.31	-0.120224	-0.273812	0.578006	Cer	3
Cer1P d23:0_6.89	-0.0743854	-0.296889	0.519867	Cer	3
Cer1P d26:0_10.85	-0.0326492	-0.362341	0.523491	Cer	3
Cer1P d26:1_7.57	-0.0686891	-0.325029	0.544807	Cer	3
Cer1P d28:1_8.58	-0.125445	-0.279829	0.595633	Cer	3
Cer1P d30:1_12.18	-0.139446	-0.334855	0.692393	Cer	3
Cer1P d32:1_15.74	-0.153524	-0.344262	0.731243	Cer	3
Cer1P d32:1_18.79	-0.0941748	-0.313663	0.578996	Cer	3
Cer1P d43:1_27.97	-0.134417	-0.316242	0.659104	Cer	3
Cer1P m36:7_8.78	0.0281106	-0.41959	0.480358	Cer	3
Cer1P m44:2_31.32	0.011587	-0.37048	0.449399	Cer	3
Cer1P t23:0_5.2	-0.154124	-0.305182	0.682651	Cer	3
Cer1P t24:0_5.85	-0.142976	-0.345152	0.712238	Cer	3
Cer1P t24:0_7.42	-0.0365826	-0.397389	0.575607	Cer	3
Cer1P t24:1_3.75	-0.161562	-0.357434	0.763353	Cer	3
Cer1P t25:0_7.69	-0.135366	-0.322852	0.669328	Cer	3
Cer1P t25:1_4.94	-0.134762	-0.352198	0.705525	Cer	3
Cer1P t26:1_6.53	-0.133603	-0.289322	0.623288	Cer	3
Cer1P t26:2_4.43	-0.117773	-0.296555	0.602274	Cer	3
Cer1P t27:1_8.22	-0.106907	-0.338864	0.635378	Cer	3
Cer1P t28:2_7.33	-0.112077	-0.300653	0.596615	Cer	3
Cer1P t40:1_28.3	-0.0761752	-0.281402	0.503573	Cer	3
Cer1P t42:1_50.78	0.0634603	-0.341362	0.313309	Cer	3
Cer1P t42:3_26.58	-0.00432093	-0.337111	0.4373	Cer	3
Cer1P t44:2_29.14	-0.133881	-0.269596	0.598713	Cer	3
Cer1P t44:3_26.99	-0.134117	-0.296534	0.633448	Cer	3
Cer1P t44:3_28.8	0.0130282	-0.335744	0.402439	Cer	3
Cer1P t44:5_24.56	-0.155539	-0.330424	0.717478	Cer	3
Cer1P t45:6_27.26	-0.135575	-0.365542	0.72406	Cer	3
Cer1P t46:5_26.58	-0.138633	-0.325691	0.679179	Cer	3
Cer1P t46:6_24.71	-0.11769	-0.308689	0.617559	Cer	3
Cer1P t48:3_32.71	-0.0741954	-0.320289	0.549287	Cer	3
Cer1P t48:4_29.26	-0.0706168	-0.381065	0.619806	Cer	3
Cer1P t48:6_26.83	-0.121513	-0.315025	0.63292	Cer	3
FGM1 d42:3_10.95	0.0359098	-0.381409	0.416874	FGM1	3
FGM1 d42:3_27.19	-0.0504369	-0.397371	0.602034	FGM1	3
FGM1 t30:3_29.66	-0.0779866	-0.211818	0.41847	FGM1	3
FGM1 t32:2_33.48	-0.0243565	-0.310754	0.442004	FGM1	3
FGM1 t39:4_26.28	-0.100516	-0.407471	0.710494	FGM1	3
FGM1 t44:4_10.86	0.0513437	-0.315072	0.302981	FGM1	3
GA2 d40:3_29.82	-0.113375	-0.308448	0.609013	GA2	3
GA2 d47:2_11.74	0.0489436	-0.292707	0.279098	GA2	3
Gb3 d34:2_22.28	-0.125633	-0.281275	0.597832	Gb3	3
Gb3 d39:5_9.69	-0.130724	-0.276706	0.601736	Gb3	3
Gb3 d42:4_28.34	-0.121875	-0.292929	0.60549	Gb3	3
Gb3 t35:1_25.3	-0.0658414	-0.359992	0.583869	Gb3	3
Gb3 t35:2_29.79	-0.142462	-0.291048	0.642398	Gb3	3
Gb3 t36:0_8.89	-0.0529674	-0.282363	0.460491	Gb3	3
Gb3 t39:1_29.75	-0.144863	-0.289487	0.644994	Gb3	3
Gb3 t40:5_31.31	-0.117225	-0.268573	0.565614	Gb3	3
Gb3 t44:5_25.48	-0.0785614	-0.310051	0.544591	Gb3	3
Gb3 t45:6_29.82	-0.0765429	-0.297451	0.524702	Gb3	3
Gb3 t49:6_26.07	0.00347668	-0.355509	0.445828	Gb3	3
GD1 d31:2_26.27	-0.123688	-0.307692	0.62774	GD1	3
GD1 d33:6_26.29	-0.07461	-0.456504	0.723442	GD1	3
GD1 d36:2_22.05	0.00597192	-0.353431	0.43842	GD1	3
GD1 d36:4_25.44	-0.0384577	-0.330668	0.494269	GD1	3
GD1 d37:0_24.66	-0.0927175	-0.313633	0.576175	GD1	3
GD1 d40:3_9.46	0.0516252	-0.407195	0.419691	GD1	3
GD1 d40:4_26.06	-0.121287	-0.326786	0.647456	GD1	3
GD1 d43:2_12.8	0.0553054	-0.340727	0.32807	GD1	3
GD1 t38:5_29.81	-0.0695103	-0.29714	0.510879	GD1	3
GD2 d40:4_26.22	-0.111458	-0.331291	0.634426	GD2	3
GD3 d40:4_25.55	0.0620592	-0.441396	0.4433	GD3	3
GD3 d43:2_5.09	-0.0424314	-0.38705	0.573615	GD3	3
GD3 d47:3_6.47	-0.0874373	-0.340963	0.600878	GD3	3
GD3 t40:2_26.1	-0.140044	-0.289357	0.63563	GD3	3
GD3 t41:3_27.97	-0.104921	-0.330791	0.621311	GD3	3
Gg4 d38:1_26.04	-0.132578	-0.339575	0.685291	Gg4	3
GM1 d31:0_4.51	-0.089973	-0.336961	0.600627	GM1	3
GM1 d35:5_25.72	0.00206118	-0.453401	0.573121	GM1	3
GM1 d43:1_6.56	-0.0571392	-0.318204	0.51407	GM1	3
GM1 t33:2_25.62	0.0786212	-0.487622	0.470515	GM1	3
GM1 t40:3_26.28	-0.0616588	-0.440214	0.677985	GM1	3
GM1 t46:4_8.48	0.0352562	-0.209937	0.199885	GM1	3
GM2 d36:0_24.72	-0.133424	-0.280985	0.612336	GM2	3
GM2 d48:5_5.17	-0.0581043	-0.364514	0.574854	GM2	3
GM2 t49:0_6.54	-0.0599681	-0.320594	0.522513	GM2	3
GM3 d38:0_28	-0.123517	-0.289634	0.604431	GM3	3
GM3 d40:5_24.2	-0.103416	-0.362384	0.658646	GM3	3
GM3 d48:2_4.47	-0.113197	-0.414946	0.744217	GM3	3
GM3 t34:0_6.75	-0.0440521	-0.279086	0.4393	GM3	3
GM3 t43:4_24.68	-0.0789256	-0.309527	0.544619	GM3	3
GM4 d36:2_6.48	-0.0791133	-0.308347	0.543476	GM4	3
GM4 d37:5_4.32	-0.0563484	-0.3423	0.543229	GM4	3
GM4 d38:4_31.3	-0.0941161	-0.330545	0.600369	GM4	3
GM4 d39:6_29.4	-0.0795246	-0.304081	0.538832	GM4	3
GM4 d40:5_7.33	-0.124465	-0.274047	0.586402	GM4	3
GM4 t32:6_31.13	-0.116913	-0.263981	0.559174	GM4	3
GM4 t39:1_31.12	-0.0294274	-0.390599	0.553305	GM4	3
GM4 t44:2_5.75	-0.104769	-0.367611	0.667883	GM4	3
GT1 d44:0_11.58	-0.0601311	-0.27557	0.465521	GT1	3
GT1 t46:0_11.49	-0.0770639	-0.258808	0.476515	GT1	3
GT2 t45:0_11.8	0.0209603	-0.376446	0.439097	GT2	3
GT3 d33:0_24.66	-0.0813604	-0.306232	0.545074	GT3	3
GT3 t35:2_26.25	-0.125235	-0.305002	0.62727	GT3	3
GT3 t41:2_26.03	-0.128548	-0.350518	0.691523	GT3	3
HexCer d36:1_25.54	0.0638713	-0.439061	0.436869	HexCer	3
HexCer d38:6_24.39	-0.128882	-0.314931	0.64687	HexCer	3
HexCer d39:5_29.42	-0.130278	-0.283215	0.609167	HexCer	3
HexCer d43:1_31.13	-0.0568727	-0.26299	0.44329	HexCer	3
HexCer d43:1_9.44	0.0536419	-0.40046	0.407269	HexCer	3
HexCer d43:3_31.18	-0.105853	-0.228399	0.492774	HexCer	3
HexCer d45:2_31.16	-0.114612	-0.240395	0.524762	HexCer	3
HexCer d46:5_30.45	-0.135437	-0.289958	0.6276	HexCer	3
HexCer d47:5_31.84	-0.0990731	-0.266811	0.528717	HexCer	3
HexCer t34:0_26.04	-0.108071	-0.311855	0.603223	HexCer	3
HexCer t36:2_25.36	-0.00559079	-0.468342	0.606745	HexCer	3
HexCer t38:1_28.6	-0.12294	-0.292915	0.607506	HexCer	3
HexCer t38:4_21.03	-0.0649359	-0.308758	0.516934	HexCer	3
HexCer t41:1_29.56	-0.133883	-0.270913	0.600393	HexCer	3
HexCer t42:7_26.54	-0.149837	-0.309882	0.680446	HexCer	3
HexCer t43:7_27.85	-0.112594	-0.286757	0.579915	HexCer	3
HexCer t44:6_9.58	-0.150578	-0.387384	0.780502	HexCer	3
HexCer t45:7_27.1	0.0727114	-0.38521	0.351455	HexCer	3
HexCer t48:0_31.16	-0.116458	-0.326311	0.637634	HexCer	3
LacCer d34:1_25.02	-0.088751	-0.29029	0.538894	LacCer	3
LacCer d35:1_26.26	-0.130098	-0.32947	0.667693	LacCer	3
LacCer d36:1_25.42	-0.0758092	-0.382475	0.631514	LacCer	3
LacCer d38:0_28.63	-0.108688	-0.293761	0.581373	LacCer	3
LacCer t33:0_30.35	-0.143428	-0.287222	0.639372	LacCer	3
LacCer t34:1_22.78	-0.10725	-0.259305	0.534774	LacCer	3
LacCer t36:4_30.76	-0.125971	-0.268112	0.581724	LacCer	3
LacCer t39:2_29.45	-0.139853	-0.31076	0.662504	LacCer	3
LacCer t44:5_24.66	-0.134464	-0.282212	0.615882	LacCer	3
LacCer t45:6_24.69	-0.129732	-0.277785	0.601216	LacCer	3
NAP m17:0_4.27	-0.0169969	-0.399181	0.540498	NAP	3
NAP m21:4_6.42	-0.132281	-0.298973	0.633047	NAP	3
Sulfatide d41:0_31.28	-0.083531	-0.250914	0.478814	Sulfatide	3
Sulfatide d42:0_30.24	-0.113099	-0.265547	0.553886	Sulfatide	3
Sulfatide d47:4_29.48	-0.140177	-0.298233	0.647179	Sulfatide	3
Sulfatide d50:4_9.66	-0.0809708	-0.313545	0.553638	Sulfatide	3
Sulfatide t36:2_26.15	-0.0764041	-0.307061	0.536667	Sulfatide	3
Sulfatide t38:3_26.29	-0.149402	-0.325684	0.69973	Sulfatide	3
Sulfatide t40:4_27.3	-0.0808012	-0.359715	0.612076	Sulfatide	3
Sulfatide t46:1_5.68	-0.170813	-0.379223	0.808745	Sulfatide	3
Cer d25:1_15.74	0.158205	0.0257011	-0.334738	Cer	4
Cer d30:0_18.54	0.491906	-0.0264164	-0.905472	Cer	4
Cer d30:1_14.95	0.344119	-0.183706	-0.423148	Cer	4
Cer d32:0_21.49	0.576154	-0.317325	-0.696061	Cer	4
Cer d32:1_18.45	0.271105	-0.121501	-0.362926	Cer	4
Cer d34:0_24.33	0.529801	-0.241457	-0.70413	Cer	4
Cer d34:1_21.77	0.259931	-0.115558	-0.349158	Cer	4
Cer d34:1_27.22	0.215069	-0.0118475	-0.395508	Cer	4
Cer d34:2_25.01	0.28412	0.0121038	-0.557816	Cer	4
Cer d34:4_24.73	0.372301	-0.151031	-0.518534	Cer	4
Cer d35:3_29.6	0.0913602	0.259401	-0.504561	Cer	4
Cer d36:0_27.01	-0.0671692	0.374979	-0.349013	Cer	4
Cer d36:1_29.53	0.227843	-0.0363967	-0.388651	Cer	4
Cer d36:4_27.17	0.526306	-0.161094	-0.799738	Cer	4
Cer d37:5_13.65	0.621008	-0.356033	-0.732428	Cer	4
Cer d38:0_29.53	0.157114	0.289914	-0.668927	Cer	4
Cer d38:1_27.19	0.4814	-0.0657353	-0.835373	Cer	4
Cer d38:2_29.69	0.105731	0.156373	-0.40087	Cer	4
Cer d38:4_29.52	0.450716	-0.181605	-0.629324	Cer	4
Cer d40:1_29.54	0.385455	-0.096716	-0.612776	Cer	4
Cer d40:1_32.16	0.341185	-0.175948	-0.42742	Cer	4
Cer d41:2_31	0.157602	-0.0311892	-0.261182	Cer	4
Cer d42:1_33.95	0.151042	0.0070454	-0.297321	Cer	4
Cer d42:1_35.21	0.205225	-0.078151	-0.292328	Cer	4
Cer d42:2_33.91	0.362426	-0.191981	-0.447564	Cer	4
Cer d44:1_35.6	0.277299	-0.165177	-0.319165	Cer	4
Cer d44:1_36.78	0.290573	-0.125734	-0.394705	Cer	4
Cer d44:5_33.61	0.357266	-0.186379	-0.444844	Cer	4
Cer m34:2_27.22	0.200907	-0.00402919	-0.378422	Cer	4
Cer m34:3_25.01	0.265329	0.034604	-0.550578	Cer	4
Cer m36:3_21.59	0.355393	-0.102601	-0.547894	Cer	4
Cer m38:1_33.2	0.595058	-0.375392	-0.658247	Cer	4
Cer m40:2_32.16	0.280988	-0.135509	-0.363965	Cer	4
Cer m41:3_31	0.175161	-0.0656487	-0.250846	Cer	4
Cer m42:1_35.77	0.169489	-0.0154317	-0.303929	Cer	4
Cer m42:2_33.94	0.349937	-0.198487	-0.415442	Cer	4
Cer m42:2_35.19	0.267303	-0.117427	-0.360853	Cer	4
Cer m44:2_36.77	0.291046	-0.179035	-0.327771	Cer	4
Cer m44:3_35.31	0.260278	-0.156145	-0.298165	Cer	4
Cer m47:6_35.21	0.28609	-0.130066	-0.380632	Cer	4
Cer m48:7_37.2	0.272983	-0.174729	-0.298767	Cer	4
Cer t33:0_16.46	0.300413	-0.12238	-0.41776	Cer	4
Cer t35:1_18.41	0.483688	-0.225874	-0.635928	Cer	4
Cer t41:1_35.01	0.419765	-0.198361	-0.548911	Cer	4
Cer t45:4_13.96	0.291489	-0.0839355	-0.449652	Cer	4
Cer t45:7_30.86	0.704712	-0.442235	-0.782515	Cer	4
Cer t46:5_26.73	0.494689	-0.180439	-0.714758	Cer	4
Cer t46:5_35.21	0.292999	-0.0907437	-0.443869	Cer	4
Cer t47:5_36	0.300662	-0.12695	-0.412418	Cer	4
Cer t48:5_34.97	0.146008	-0.0296968	-0.240947	Cer	4
Cer t48:6_35.33	0.297717	-0.156634	-0.369017	Cer	4
Cer1P m46:2_32.15	0.305138	-0.137985	-0.406919	Cer	4
Cer1P m47:1_35.18	0.0460837	0.211271	-0.356869	Cer	4
Cer1P t48:0_33.05	0.267915	-0.0427703	-0.45704	Cer	4
FGM1 d33:1_20.99	0.309012	-0.0512983	-0.524644	FGM1	4
GA2 d37:1_34.01	0.267628	-0.0071174	-0.501867	GA2	4
GA2 t34:2_34.34	0.283288	-0.143722	-0.357904	GA2	4
Gb3 d30:3_33.94	0.233919	-0.0401547	-0.395467	Gb3	4
Gb3 d31:0_24.3	0.186118	-0.105689	-0.220803	Gb3	4
Gb3 t42:6_26.79	0.503507	-0.209965	-0.694012	Gb3	4
Gb3 t45:6_35.08	0.356634	-0.0817201	-0.576838	Gb3	4
GD1 t36:0_22.84	0.325579	-0.149781	-0.430929	GD1	4
GD1 t36:1_19.94	0.201701	0.083641	-0.491517	GD1	4
GD1 t36:2_21.27	0.257757	-0.0186016	-0.468408	GD1	4
GD1 t37:3_13.76	0.409961	-0.0215795	-0.755188	GD1	4
GD1 t38:3_21.64	0.263354	-0.0988323	-0.376981	GD1	4
GD1 t42:2_20.13	0.250433	-0.0600565	-0.401664	GD1	4
GD3 d34:2_19.94	0.152963	0.0811182	-0.395261	GD3	4
GM1 d34:2_20.05	0.211419	0.0221582	-0.43182	GM1	4
GM2 d34:3_33.03	0.472508	-0.19625	-0.652288	GM2	4
GM4 t33:4_33.05	0.423577	-0.209311	-0.54225	GM4	4
GT1 d39:0_15.57	0.183418	0.0870381	-0.460938	GT1	4
GT1 t34:1_19.89	0.263372	0.0574021	-0.575858	GT1	4
GT2 t37:1_14.03	0.355371	-0.186906	-0.440555	GT2	4
GT3 d30:0_15.45	0.267531	-0.0867864	-0.400286	GT3	4
HexCer d34:1_25.68	0.275874	-0.0320682	-0.485853	HexCer	4
HexCer d35:2_34.49	0.29178	-0.167237	-0.344189	HexCer	4
HexCer d35:4_29.24	0.22491	-0.110214	-0.289102	HexCer	4
HexCer d36:4_25.72	0.37023	0.0492864	-0.769531	HexCer	4
HexCer d40:2_30.33	0.246706	-0.0821191	-0.366469	HexCer	4
HexCer d46:6_32.12	0.270994	-0.161479	-0.311833	HexCer	4
HexCer d47:1_19.98	-0.00413805	0.165047	-0.20216	HexCer	4
HexCer t36:4_25.02	0.296302	0.0782541	-0.665264	HexCer	4
HexCer t46:5_32.98	0.406069	-0.183903	-0.541165	HexCer	4
LacCer d33:0_33.01	0.496405	-0.204274	-0.687698	LacCer	4
LacCer d42:3_34.02	0.285979	-0.00654082	-0.537636	LacCer	4
LacCer d45:1_34.94	0.489118	-0.145779	-0.748233	LacCer	4
LacCer t45:6_34.37	0.29227	-0.133003	-0.388694	LacCer	4
Lyso GM1 d25:2_15.54	0.0687849	0.182521	-0.363616	Lyso GM1	4
Sulfatide d34:2_8.42	0.166457	-0.101046	-0.189178	Sulfatide	4
Sulfatide d42:0_34.61	0.294033	-0.154823	-0.364287	Sulfatide	4
Sulfatide t37:1_21.36	0.270672	0.0439057	-0.572618	Sulfatide	4
Sulfatide t41:0_33.94	0.368603	-0.136858	-0.529513	Sulfatide	4
Cer d30:2_12.55	0.444009	-0.657754	-0.0105122	Cer	5
Cer d32:3_21.24	0.0784505	-0.16392	0.0588568	Cer	5
Cer d38:5_11.84	0.256268	-0.611541	0.289085	Cer	5
Cer d39:1_30.59	0.188817	-0.527499	0.310893	Cer	5
Cer d40:1_35.6	0.270105	-0.394074	-0.0141057	Cer	5
Cer d41:1_31.75	0.501988	-0.858757	0.134623	Cer	5
Cer d41:2_30.28	0.344478	-0.54374	0.0343933	Cer	5
Cer d42:1_30.21	0.287083	-0.496188	0.0834439	Cer	5
Cer d42:1_33.43	0.161765	-0.355353	0.143443	Cer	5
Cer d43:1_31.1	0.0743642	-0.272027	0.204248	Cer	5
Cer d43:1_33.51	0.197267	-0.415666	0.152429	Cer	5
Cer d44:5_35.59	0.249883	-0.390624	0.0201094	Cer	5
Cer d45:2_35.82	0.269815	-0.444075	0.0500854	Cer	5
Cer d47:7_36.53	0.163062	-0.402319	0.200742	Cer	5
Cer d48:7_35.86	0.0960599	-0.234862	0.115528	Cer	5
Cer m34:4_30.81	0.167206	-0.321797	0.090348	Cer	5
Cer m35:1_36.31	0.243496	-0.535783	0.21705	Cer	5
Cer m36:0_37.58	0.268691	-0.386517	-0.021025	Cer	5
Cer m38:3_31.33	0.484048	-0.712333	-0.0174865	Cer	5
Cer m39:1_36.53	0.267207	-0.395401	-0.00688451	Cer	5
Cer m39:2_30.59	0.238678	-0.561209	0.258608	Cer	5
Cer m41:0_35.55	0.109158	-0.174883	0.0141861	Cer	5
Cer m41:1_37.85	0.203501	-0.302084	-0.00403059	Cer	5
Cer m42:2_33.43	0.184932	-0.364406	0.110737	Cer	5
Cer m42:4_30.59	0.279179	-0.57179	0.194754	Cer	5
Cer m43:6_26.96	0.221925	-0.404364	0.090969	Cer	5
Cer m45:7_36.52	0.135838	-0.340947	0.174604	Cer	5
Cer t24:0_10.78	0.123203	-0.283739	0.125917	Cer	5
Cer t38:0_26.46	0.298932	-0.431913	-0.0209818	Cer	5
Cer t45:0_12.14	0.450646	-0.882252	0.262543	Cer	5
Cer t45:2_35.82	0.2797	-0.465439	0.0584051	Cer	5
Cer t46:1_36.59	0.205524	-0.379582	0.0907401	Cer	5
Cer t46:2_35.94	0.403655	-0.593556	-0.0151794	Cer	5
Cer t46:3_34.81	0.139821	-0.331678	0.155205	Cer	5
Cer t47:3_35.6	0.281018	-0.45747	0.0457455	Cer	5
Cer t48:4_35.54	0.268692	-0.411668	0.0109823	Cer	5
Cer t48:5_32.34	0.298944	-0.612148	0.208387	Cer	5
Cer1P d30:1_12.6	0.305683	-0.514811	0.0716382	Cer	5
Cer1P t29:3_10.78	0.116484	-0.347875	0.220372	Cer	5
Cer1P t36:4_12.55	0.155062	-0.430153	0.25144	Cer	5
Cer1P t48:4_50.8	0.110886	-0.381495	0.273847	Cer	5
FGM1 t48:3_8.16	0.258621	-0.430208	0.053807	FGM1	5
GA2 d35:3_33.42	0.160416	-0.353253	0.143345	GA2	5
GA2 t41:2_30	0.0745056	-0.228725	0.148866	GA2	5
Gb3 d34:2_30.59	0.287718	-0.593689	0.206324	Gb3	5
Gb3 d37:2_33.42	0.160973	-0.353645	0.142781	Gb3	5
Gb3 d39:1_30.21	0.283411	-0.544706	0.152204	Gb3	5
Gb3 d45:1_35.47	0.11291	-0.297756	0.163407	Gb3	5
Gb3 t40:6_12.21	0.249963	-0.654968	0.356394	Gb3	5
Gb3 t42:0_12.91	0.157132	-0.45125	0.27434	Gb3	5
Gb3 t44:4_30.1	0.290614	-0.566059	0.16563	Gb3	5
GD1 d40:3_26.93	0.247797	-0.469961	0.125065	GD1	5
GD1 d42:6_26.93	0.208324	-0.42619	0.144715	GD1	5
GD1 d43:3_7.51	0.310752	-0.570774	0.133186	GD1	5
GD1 d50:6_11.96	0.168887	-0.549546	0.377	GD1	5
GD1 t38:6_29.09	0.138227	-0.221297	0.0177619	GD1	5
GD1 t40:3_26.93	0.226413	-0.390177	0.0643462	GD1	5
GD1 t42:2_12.11	0.433016	-0.670896	0.0272019	GD1	5
GD1 t45:3_7.47	0.362326	-0.576794	0.0423883	GD1	5
GD1 t48:5_11.95	0.434292	-0.909115	0.327953	GD1	5
GD2 d36:4_9.44	0.201906	-0.428531	0.159946	GD2	5
GD2 d40:1_29.09	0.132327	-0.230542	0.0407918	GD2	5
GD2 d42:4_10.92	0.0760554	-0.324869	0.268272	GD2	5
Gg4 d33:1_24.06	0.149808	-0.436032	0.268952	Gg4	5
GM1 d42:5_26.99	0.220196	-0.371352	0.0522554	GM1	5
GM3 d41:5_33.02	0.167308	-0.276081	0.0319696	GM3	5
GM3 t37:0_33.96	0.125464	-0.213509	0.0322176	GM3	5
GM4 d49:2_27.87	0.284681	-0.430224	0.00407585	GM4	5
GT1 d46:0_11.49	0.431992	-0.845191	0.250987	GT1	5
GT1 t49:0_9.34	0.377786	-0.562196	-0.00570495	GT1	5
GT2 d43:0_11.86	0.184279	-0.482051	0.261715	GT2	5
GT2 t43:1_7.93	0.347976	-0.561583	0.0504237	GT2	5
HexCer d43:1_33.51	0.198067	-0.416648	0.152151	HexCer	5
HexCer d44:3_30.11	0.421437	-0.63246	0.000387069	HexCer	5
HexCer t36:5_29.44	0.262022	-0.483673	0.11536	HexCer	5
HexCer t40:5_32.28	0.314822	-0.538235	0.0840032	HexCer	5
HexCer t42:0_35.07	0.086115	-0.270826	0.180287	HexCer	5
HexCer t47:5_30.34	0.374447	-0.708017	0.18626	HexCer	5
HexCer t48:5_34.22	0.160383	-0.317282	0.0976269	HexCer	5
LacCer d33:1_12.1	0.387137	-0.932233	0.447399	LacCer	5
LacCer d36:0_33.57	0.200252	-0.439411	0.176951	LacCer	5
LacCer d39:2_30.1	0.399323	-0.598178	-0.00102699	LacCer	5
LacCer d41:4_30.61	0.187096	-0.519401	0.303873	LacCer	5
LacCer d44:6_11.76	0.170519	-0.502406	0.313889	LacCer	5
LacCer d45:3_36.29	0.118867	-0.304973	0.161219	LacCer	5
LacCer d46:1_36.57	0.179707	-0.351787	0.104653	LacCer	5
LacCer t31:1_12.91	0.0970807	-0.436717	0.370486	LacCer	5
LacCer t41:5_2.1	0.168018	-0.697477	0.566936	LacCer	5
LacCer t45:0_34.59	0.0614514	-0.17834	0.109663	LacCer	5
LacCer t45:0_35.59	0.287405	-0.41533	-0.0200802	LacCer	5
NAP m18:2_2.01	0.112028	-0.180711	0.0161229	NAP	5
Sulfatide d43:3_12.53	0.335065	-0.924915	0.537495	Sulfatide	5
Sulfatide d50:4_33.43	0.163271	-0.35592	0.141291	Sulfatide	5
Sulfatide t39:0_30.32	0.3138	-0.513736	0.0547729	Sulfatide	5
Sulfatide t44:0_35.57	0.23685	-0.38041	0.0319899	Sulfatide	5
Sulfatide t44:1_33.98	0.096499	-0.346429	0.256684	Sulfatide	5
Sulfatide t44:2_31.99	0.387474	-0.605602	0.0310434	Sulfatide	5
Sulfatide t47:3_12.28	0.339955	-0.789157	0.355376	Sulfatide	5
Sulfatide t48:0_35.06	0.199151	-0.290841	-0.0100355	Sulfatide	5
Cer d34:1_25.05	-0.196903	-0.172329	0.595233	Cer	6
Cer d36:1_23.73	-0.269239	-0.096635	0.636991	Cer	6
Cer d39:2_23.63	-0.25979	-0.138193	0.671846	Cer	6
Cer m23:1_11.91	-0.141711	-0.0740996	0.364848	Cer	6
Cer m27:2_22.15	-0.21938	-0.127925	0.58163	Cer	6
Cer m28:2_22.15	-0.214877	-0.10833	0.548095	Cer	6
Cer m40:2_36.72	-0.323467	-0.244112	0.928217	Cer	6
Cer m41:2_32.54	-0.201714	-0.0917884	0.501912	Cer	6
Cer t37:0_28.18	-0.24777	-0.112236	0.615861	Cer	6
Cer t47:1_24.05	-0.173988	-0.0593815	0.407736	Cer	6
Cer1P m41:1_26.99	-0.320621	-0.146421	0.798449	Cer	6
Cer1P m44:5_29.13	-0.265288	-0.0537954	0.574925	Cer	6
Cer1P t21:1_3.45	-0.297992	-0.153318	0.764027	Cer	6
Cer1P t28:3_4.86	-0.366638	-0.214289	0.972676	Cer	6
Cer1P t41:0_32.59	-0.253194	-0.0214787	0.510706	Cer	6
Cer1P t41:1_31.36	-0.213853	-0.12857	0.5719	Cer	6
Cer1P t44:5_24.89	-0.422973	-0.069064	0.895393	Cer	6
Cer1P t44:5_29.47	-0.379474	-0.0508662	0.789189	Cer	6
Cer1P t45:0_23.03	-0.356672	-0.0537091	0.749277	Cer	6
Cer1P t48:4_31.69	-0.277249	-0.124814	0.688147	Cer	6
FGM1 d34:3_27.11	-0.263285	-0.133992	0.673171	FGM1	6
FGM1 d44:2_30.83	-0.30296	-0.248565	0.894734	FGM1	6
FGM1 t38:0_26.11	-0.35015	-0.162367	0.875117	FGM1	6
FGM1 t40:0_28.22	-0.366893	-0.0795174	0.801636	FGM1	6
GA2 d31:3_31.77	-0.406895	-0.0436858	0.8324	GA2	6
GA2 t32:2_32.55	-0.253633	-0.182614	0.716626	GA2	6
GA2 t32:3_30.75	-0.230409	-0.192375	0.684712	GA2	6
Gb3 d30:2_32.56	-0.421987	-0.0384452	0.854542	Gb3	6
Gb3 d30:4_27.89	-0.242063	-0.0992544	0.588443	Gb3	6
Gb3 d32:4_29.9	-0.341812	-0.105157	0.786386	Gb3	6
Gb3 d40:5_29.16	-0.241213	-0.12117	0.614713	Gb3	6
Gb3 d42:4_31.17	-0.201292	-0.152118	0.577889	Gb3	6
Gb3 d44:4_32.95	-0.317891	-0.062843	0.686864	Gb3	6
Gb3 t30:2_32.55	-0.336741	-0.0442323	0.699165	Gb3	6
Gb3 t30:4_28.27	-0.426256	-0.17811	1.04045	Gb3	6
Gb3 t30:4_29.32	-0.26456	-0.169242	0.720469	Gb3	6
Gb3 t31:4_26.32	-0.325367	-0.278501	0.97561	Gb3	6
Gb3 t34:0_25.05	-0.199256	-0.169326	0.595903	Gb3	6
Gb3 t38:2_32.58	-0.197166	-0.119145	0.528047	Gb3	6
GD1 d38:1_26.06	-0.33815	-0.154924	0.842735	GD1	6
GD1 d40:1_28.22	-0.377876	-0.0879235	0.833303	GD1	6
GD1 d40:5_26.07	-0.335493	-0.162482	0.847282	GD1	6
GD1 d41:1_29.2	-0.297983	-0.185167	0.804543	GD1	6
GD1 d42:6_24.39	-0.310911	-0.155778	0.79182	GD1	6
GD1 d44:6_26.65	-0.387528	-0.13938	0.917218	GD1	6
GD1 t35:0_23.74	-0.230989	-0.13465	0.612352	GD1	6
GD1 t36:0_23.69	-0.290526	-0.0875841	0.666112	GD1	6
GD1 t36:1_23.68	-0.300059	-0.232898	0.869256	GD1	6
GD1 t44:5_24.38	-0.322202	-0.150123	0.806178	GD1	6
GD2 d42:2_28.2	-0.387847	-0.0669665	0.825666	GD2	6
GD2 t42:0_29.21	-0.270781	-0.151741	0.71007	GD2	6
GD3 d33:1_28.6	-0.435653	-0.0964369	0.954439	GD3	6
GD3 d36:2_26.49	-0.418179	-0.148709	0.987608	GD3	6
GD3 d37:1_23	-0.398845	-0.0194577	0.786195	GD3	6
GD3 d40:1_29.48	-0.392382	-0.0499193	0.812627	GD3	6
GD3 d40:2_27.79	-0.25766	-0.106471	0.627405	GD3	6
GD3 d42:2_29.24	-0.320416	-0.140568	0.790608	GD3	6
GD3 t36:4_28.62	-0.433258	-0.100835	0.955464	GD3	6
Gg4 d36:1_23.75	-0.243378	-0.126776	0.625982	Gg4	6
Gg4 d37:4_29.27	-0.305118	-0.151488	0.7753	Gg4	6
Gg4 d42:4_29.44	-0.343779	-0.156739	0.855791	Gg4	6
Gg4 t50:0_26.76	-0.408144	-0.0790173	0.879752	Gg4	6
GM1 d36:4_24.81	-0.322477	-0.245964	0.928683	GM1	6
GM1 t40:1_29.15	-0.276375	-0.0261084	0.560853	GM1	6
GM2 t36:0_29.09	-0.267917	-0.0649844	0.594185	GM2	6
GM2 t49:0_29.03	-0.314741	-0.0169265	0.622411	GM2	6
GM3 d36:3_23.04	-0.277989	-0.160837	0.735408	GM3	6
GM3 d36:5_22.99	-0.297296	-0.190993	0.810646	GM3	6
GM3 d42:2_28.04	-0.214106	-0.166603	0.620789	GM3	6
GM3 d43:2_30	-0.275418	-0.141806	0.706279	GM3	6
GM3 t36:0_24.45	-0.303542	-0.126516	0.740509	GM3	6
GM3 t38:1_27.1	-0.355531	-0.118368	0.82939	GM3	6
GM3 t41:2_28.29	-0.416353	-0.0755273	0.890982	GM3	6
GM4 d34:6_32.57	-0.319816	-0.0485943	0.672406	GM4	6
GM4 d35:3_29.59	-0.402576	-0.0838636	0.87529	GM4	6
GM4 d35:4_32.55	-0.393256	-0.0905596	0.866019	GM4	6
GM4 t47:5_30.98	-0.288325	-0.106454	0.685926	GM4	6
GM4 t47:6_29.14	-0.201311	-0.159182	0.586917	GM4	6
GT2 d33:0_26.82	-0.354516	-0.0471899	0.736863	GT2	6
GT3 t41:2_26.93	-0.340463	-0.0556563	0.720809	GT3	6
HexCer d34:1_23.27	-0.246283	-0.205989	0.732345	HexCer	6
HexCer d39:4_29.75	-0.408178	-0.0745184	0.87409	HexCer	6
HexCer d42:2_29.48	-0.218673	-0.0572305	0.490306	HexCer	6
HexCer d43:6_29.72	-0.26597	-0.203225	0.766411	HexCer	6
HexCer d44:4_31.43	-0.246538	-0.182324	0.702712	HexCer	6
HexCer d46:4_32.18	-0.238293	-0.113069	0.598829	HexCer	6
HexCer d47:4_31.29	-0.144919	-0.0486388	0.338568	HexCer	6
HexCer d47:5_32.67	-0.229292	-0.194524	0.685314	HexCer	6
HexCer d48:0_29.87	-0.209851	-0.152523	0.594746	HexCer	6
HexCer t41:2_31.59	-0.230429	-0.155724	0.638104	HexCer	6
HexCer t46:4_32.83	-0.251286	-0.0900465	0.594332	HexCer	6
LacCer d32:4_28.73	-0.321246	-0.170425	0.830191	LacCer	6
LacCer d34:5_22.91	-0.259548	-0.107841	0.632752	LacCer	6
LacCer d37:2_29.68	-0.228802	-0.185342	0.672693	LacCer	6
LacCer d40:5_30.19	-0.321899	-0.157835	0.815415	LacCer	6
LacCer d41:5_29.88	-0.450593	-0.0417397	0.913347	LacCer	6
LacCer d44:6_29.64	-0.201314	-0.0340796	0.427701	LacCer	6
LacCer t31:4_30.04	-0.298732	-0.0178621	0.59304	LacCer	6
LacCer t34:3_30.85	-0.300642	-0.11115	0.715418	LacCer	6
LacCer t35:2_26.52	-0.380717	-0.162326	0.933419	LacCer	6
LacCer t35:2_26.94	-0.349185	-0.106975	0.802776	LacCer	6
LacCer t35:2_30.04	-0.274912	-0.127267	0.686808	LacCer	6
LacCer t37:2_31.56	-0.335389	-0.0407549	0.692157	LacCer	6
LacCer t37:4_31.41	-0.318459	-0.0241723	0.638732	LacCer	6
LacCer t37:5_29.59	-0.31639	-0.146522	0.7905	LacCer	6
LacCer t37:5_29.73	-0.293413	-0.221644	0.842244	LacCer	6
LacCer t38:3_30.75	-0.336242	-0.126277	0.802634	LacCer	6
LacCer t39:3_29.21	-0.293247	-0.197185	0.810798	LacCer	6
LacCer t41:1_32.61	-0.257297	-0.153311	0.686327	LacCer	6
LacCer t41:4_28.57	-0.414579	-0.141358	0.971379	LacCer	6
LacCer t41:5_32.47	-0.284916	-0.207426	0.807928	LacCer	6
LacCer t46:5_7.55	-0.24165	-0.0842306	0.568534	LacCer	6
NAP m23:4_25.99	-0.364829	-0.213218	0.967859	NAP	6
NAP m25:2_22.36	-0.247364	-0.138302	0.648262	NAP	6
Sulfatide d35:1_24.44	-0.320597	-0.110906	0.753201	Sulfatide	6
Sulfatide d36:1_25.56	-0.229528	-0.14303	0.620228	Sulfatide	6
Sulfatide d37:1_26.69	-0.405344	-0.0541648	0.842776	Sulfatide	6
Sulfatide d38:0_28.46	-0.394913	-0.0813811	0.857501	Sulfatide	6
Sulfatide d39:1_29.72	-0.254305	-0.180985	0.715836	Sulfatide	6
Sulfatide d40:4_21.99	-0.222938	-0.175339	0.648767	Sulfatide	6
Sulfatide d41:1_29.26	-0.29777	-0.166409	0.780263	Sulfatide	6
Sulfatide d41:1_29.72	-0.379734	-0.122322	0.880629	Sulfatide	6
Sulfatide d41:3_26.31	-0.367896	-0.144469	0.886217	Sulfatide	6
Sulfatide d42:4_25.97	-0.314401	-0.220344	0.880659	Sulfatide	6
Sulfatide d42:4_26.98	-0.34491	-0.19404	0.905423	Sulfatide	6
Sulfatide d43:4_28.28	-0.424616	-0.0150625	0.8298	Sulfatide	6
Sulfatide d43:4_29.14	-0.218271	-0.18359	0.65036	Sulfatide	6
Sulfatide t34:2_20.43	-0.205176	-0.180935	0.621981	Sulfatide	6
Sulfatide t37:0_27.05	-0.269016	-0.117438	0.663044	Sulfatide	6
Sulfatide t38:1_27.22	-0.323546	-0.0897273	0.731878	Sulfatide	6
Sulfatide t40:0_30.01	-0.292661	-0.0348142	0.603024	Sulfatide	6
Sulfatide t40:2_27.16	-0.315307	-0.0980234	0.726708	Sulfatide	6
Sulfatide t40:3_30.01	-0.257718	-0.078757	0.592243	Sulfatide	6
Sulfatide t42:0_30.76	-0.317963	-0.196729	0.857402	Sulfatide	6
Sulfatide t42:3_27.22	-0.318043	-0.079142	0.707899	Sulfatide	6
Sulfatide t44:1_7.06	-0.219357	-0.141542	0.598916	Sulfatide	6
Sulfatide t44:2_32.37	-0.217869	-0.18932	0.656883	Sulfatide	6
Sulfatide t46:2_39.3	-0.176155	-0.130374	0.502226	Sulfatide	6
Sulfatide t47:4_32.59	-0.256704	-0.183589	0.723731	Sulfatide	6
Cer d27:1_15.06	-0.714194	0.300974	0.980403	Cer	7
Cer d34:1_25.92	-0.565527	0.405262	0.563853	Cer	7
Cer d35:3_23.22	-0.337581	0.144018	0.461177	Cer	7
Cer d36:1_22.89	-0.328483	-0.014276	0.645273	Cer	7
Cer d39:6_28.93	-0.339307	0.19571	0.398683	Cer	7
Cer d42:2_35.59	-0.377326	0.0828881	0.614856	Cer	7
Cer d45:5_35.72	-0.749399	0.628368	0.630929	Cer	7
Cer d46:4_33.97	-0.412315	0.430401	0.239363	Cer	7
Cer d46:4_35.14	-0.6507	0.567899	0.519465	Cer	7
Cer d48:0_33.8	-0.488577	0.175968	0.708777	Cer	7
Cer d48:4_36.72	-0.636461	0.344421	0.776708	Cer	7
Cer m22:1_4.85	-0.327987	0.320185	0.218649	Cer	7
Cer m25:1_15.33	-0.440101	0.277137	0.487473	Cer	7
Cer m26:2_18.91	-0.298063	0.0172012	0.547138	Cer	7
Cer m27:2_20.69	-0.615292	0.464255	0.583778	Cer	7
Cer m36:1_30.35	-0.429395	0.84379	-0.25416	Cer	7
Cer m41:0_44.56	-0.46824	0.107236	0.757431	Cer	7
Cer m42:3_36.55	-0.653213	0.0176802	1.22454	Cer	7
Cer m43:2_33.78	-0.465669	0.187672	0.650148	Cer	7
Cer m43:4_35.62	-0.454682	0.358551	0.411692	Cer	7
Cer m45:5_35.73	-0.701666	0.519522	0.678334	Cer	7
Cer t36:0_23.12	-0.294333	0.0832805	0.455915	Cer	7
Cer t42:0_20.73	-0.337436	0.170833	0.426771	Cer	7
Cer t43:2_32.55	-0.349342	0.387914	0.173218	Cer	7
Cer1P d35:1_27.73	-0.367026	0.0323137	0.65956	Cer	7
Cer1P d39:3_29.12	-0.294244	0.11319	0.417678	Cer	7
Cer1P m35:2_29.78	-0.775837	0.419125	0.947711	Cer	7
Cer1P m45:0_35.89	-0.265083	0.385375	0.0155903	Cer	7
Cer1P m46:0_36.63	-0.263709	0.307361	0.112258	Cer	7
Cer1P m47:0_35.9	-0.322401	0.434487	0.0625092	Cer	7
Cer1P m47:0_37.39	-0.282833	0.388378	0.0456537	Cer	7
Cer1P t26:2_43.82	-0.542597	0.0388048	0.98648	Cer	7
Cer1P t39:3_44.73	-0.566779	0.339393	0.650078	Cer	7
Cer1P t41:4_27.82	-0.40726	0.0594107	0.701883	Cer	7
GA2 t31:3_29.76	-0.491788	0.101315	0.809921	GA2	7
GA2 t33:3_31.36	-0.265902	0.120478	0.354294	GA2	7
GA2 t33:3_31.76	-0.351694	0.00898007	0.659987	GA2	7
Gb3 d30:6_28.77	-0.522428	0.0648727	0.914798	Gb3	7
Gb3 d31:4_28.87	-0.409607	0.0953435	0.66063	Gb3	7
Gb3 d33:3_31.77	-0.30764	0.0875905	0.475833	Gb3	7
Gb3 t30:6_27.93	-0.488655	0.141305	0.753044	Gb3	7
Gb3 t30:6_28.14	-0.524563	0.000133597	1.00127	Gb3	7
Gb3 t30:6_28.72	-0.51718	-0.0185977	1.01101	Gb3	7
GD1 d42:1_30.19	-0.295057	0.0332702	0.520947	GD1	7
GD1 d42:2_28.03	-0.535276	0.161558	0.816271	GD1	7
GD2 d34:5_23.01	-0.39394	0.039932	0.701246	GD2	7
GD2 d37:1_25.12	-0.371756	0.00444309	0.70406	GD2	7
GD2 t45:3_24.53	-0.268339	0.0580365	0.438419	GD2	7
GD3 d44:4_27.99	-0.47884	0.0876971	0.802534	GD3	7
GD3 t35:0_23.31	-0.345232	0.102031	0.529222	GD3	7
Gg4 t41:4_30.07	-0.359522	0.0115387	0.671675	Gg4	7
GM1 d41:2_28.06	-0.500689	0.0776273	0.857063	GM1	7
GM1 t37:1_28.88	-0.405102	0.102701	0.642667	GM1	7
GM3 d42:1_30.07	-0.429601	-0.00731438	0.829457	GM3	7
GM3 t40:1_29.12	-0.25955	-0.00229214	0.498421	GM3	7
GM4 d33:5_29.74	-0.430052	0.193151	0.575181	GM4	7
GM4 d34:4_29.71	-0.53584	0.0616775	0.944469	GM4	7
GM4 t34:4_31.34	-0.374866	0.165677	0.504791	GM4	7
GM4 t34:5_31.32	-0.194878	0.0156998	0.352058	GM4	7
GT1 d38:1_25.12	-0.325332	-0.00280919	0.624665	GT1	7
HexCer t44:5_23.33	-0.332539	0.118555	0.483959	HexCer	7
HexCer t46:6_31.84	-0.402328	-0.0128108	0.784386	HexCer	7
LacCer d32:0_23.39	-0.32343	0.134832	0.445853	LacCer	7
LacCer d40:4_31.75	-0.440245	0.184287	0.605922	LacCer	7
LacCer t35:1_28.01	-0.566524	0.101335	0.952574	LacCer	7
LacCer t35:3_31.61	-0.397806	0.339439	0.327435	LacCer	7
LacCer t37:2_31.63	-0.45145	0.0508819	0.7971	LacCer	7
LacCer t37:3_33.46	-0.460459	0.0146488	0.860414	LacCer	7
LacCer t37:5_28.86	-0.460396	0.113141	0.734941	LacCer	7
LacCer t39:2_33.46	-0.461473	0.097029	0.757502	LacCer	7
LacCer t39:4_29.59	-0.271711	0.00977951	0.506275	LacCer	7
LacCer t41:0_42.21	-0.454074	0.368538	0.397821	LacCer	7
Sulfatide d40:3_28.87	-0.412477	0.102955	0.656422	Sulfatide	7
Sulfatide t34:1_24.82	-0.308372	0.0248756	0.557051	Sulfatide	7
Sulfatide t36:1_25.08	-0.342695	0.0576032	0.580922	Sulfatide	7
Sulfatide t36:1_28.85	-0.461227	0.120122	0.727642	Sulfatide	7
Sulfatide t38:2_25.21	-0.325077	-0.00206791	0.623234	Sulfatide	7
Sulfatide t42:2_29.14	-0.250429	0.0703727	0.388526	Sulfatide	7
Sulfatide t42:2_30.75	-0.430318	0.0449406	0.764318	Sulfatide	7
Sulfatide t43:3_29.59	-0.277909	0.135806	0.357709	Sulfatide	7
Sulfatide t44:2_38	-0.299987	0.444781	0.00661868	Sulfatide	7
Sulfatide t46:0_42.6	-0.3278	0.545386	-0.0683274	Sulfatide	7
Sulfatide t47:0_44.28	-0.401838	0.252411	0.445895	Sulfatide	7
Sulfatide t48:2_41.49	-0.457678	0.294978	0.498322	Sulfatide	7
Cer d24:1_19.03	0.751777	-0.564774	-0.716407	Cer	8
Cer d24:1_20.28	0.75977	-0.705009	-0.553186	Cer	8
Cer d26:0_21.37	0.376871	-0.277878	-0.365819	Cer	8
Cer d28:1_17.95	0.912551	-0.762323	-0.771913	Cer	8
Cer d31:0_19.89	0.484863	-0.339565	-0.493473	Cer	8
Cer d33:0_26.89	0.362141	-0.297931	-0.312176	Cer	8
Cer d35:0_29.2	0.223332	-0.205097	-0.165327	Cer	8
Cer d37:0_29.25	0.16048	-0.150956	-0.114245	Cer	8
Cer d38:1_31.97	0.363912	-0.301424	-0.31111	Cer	8
Cer d38:1_36.69	0.541121	-0.480268	-0.421799	Cer	8
Cer d38:3_21.67	0.623694	-0.506961	-0.545465	Cer	8
Cer d40:2_31.73	0.214628	-0.138445	-0.233541	Cer	8
Cer d41:1_29.26	0.160872	-0.127071	-0.145392	Cer	8
Cer d41:1_34.37	0.202334	-0.194778	-0.138374	Cer	8
Cer d42:0_32.15	0.725642	-0.598553	-0.623523	Cer	8
Cer d42:1_35.74	0.279645	-0.23279	-0.237589	Cer	8
Cer d43:1_36.02	0.24945	-0.227788	-0.186311	Cer	8
Cer d44:1_35.07	0.378631	-0.318212	-0.317844	Cer	8
Cer d44:2_35.02	0.36243	-0.2489	-0.37513	Cer	8
Cer d44:2_35.3	0.279156	-0.194915	-0.284862	Cer	8
Cer d44:5_34.76	0.221408	-0.147743	-0.234652	Cer	8
Cer d45:6_35.93	0.377921	-0.247439	-0.406563	Cer	8
Cer d46:3_35.15	0.4997	-0.397325	-0.448287	Cer	8
Cer d48:2_35.2	0.444051	-0.33555	-0.42067	Cer	8
Cer m23:0_16.73	0.909529	-0.85691	-0.645761	Cer	8
Cer m23:1_18.72	0.781133	-0.674141	-0.633256	Cer	8
Cer m24:1_18.76	0.745464	-0.669798	-0.570688	Cer	8
Cer m26:2_12.61	0.879185	-0.842763	-0.605838	Cer	8
Cer m27:0_14.97	0.162778	-0.15424	-0.114453	Cer	8
Cer m28:2_16.03	0.931265	-0.817039	-0.738003	Cer	8
Cer m29:2_20.72	0.717351	-0.595038	-0.612166	Cer	8
Cer m30:0_32.26	0.586808	-0.521072	-0.457087	Cer	8
Cer m31:2_22.67	0.681888	-0.562627	-0.585715	Cer	8
Cer m32:0_28.67	0.959407	-0.844926	-0.756234	Cer	8
Cer m32:0_34.28	0.659096	-0.503402	-0.61758	Cer	8
Cer m33:0_29.28	0.747856	-0.708222	-0.526352	Cer	8
Cer m33:0_29.8	0.982139	-0.826688	-0.822845	Cer	8
Cer m33:3_12.59	0.872145	-0.669609	-0.812774	Cer	8
Cer m33:3_14.22	0.899765	-0.794623	-0.706394	Cer	8
Cer m34:0_29.21	0.77578	-0.719521	-0.565279	Cer	8
Cer m34:0_30.9	0.917215	-0.775156	-0.764484	Cer	8
Cer m34:0_35.42	0.698397	-0.6576	-0.496357	Cer	8
Cer m34:1_32.89	0.567666	-0.395344	-0.580561	Cer	8
Cer m34:1_34.3	0.44434	-0.307756	-0.456596	Cer	8
Cer m34:2_37.44	0.193683	-0.129883	-0.204454	Cer	8
Cer m34:3_8.44	0.825012	-0.695289	-0.69011	Cer	8
Cer m35:0_31.4	0.862481	-0.746323	-0.696689	Cer	8
Cer m35:0_31.94	0.979256	-0.824255	-0.820438	Cer	8
Cer m35:0_32.57	0.440719	-0.394262	-0.339585	Cer	8
Cer m35:1_22.67	0.811299	-0.760876	-0.580455	Cer	8
Cer m35:2_10.67	0.728961	-0.525457	-0.722889	Cer	8
Cer m35:2_32.09	0.613999	-0.571726	-0.444528	Cer	8
Cer m36:0_29.41	0.699701	-0.517933	-0.676605	Cer	8
Cer m36:0_31.37	0.790716	-0.666487	-0.661292	Cer	8
Cer m36:1_29.43	0.843681	-0.671395	-0.75616	Cer	8
Cer m36:7_15.63	0.361794	-0.31335	-0.29189	Cer	8
Cer m37:0_30.16	0.499638	-0.423833	-0.414431	Cer	8
Cer m37:0_33.9	0.955994	-0.804189	-0.801566	Cer	8
Cer m37:0_36.15	0.490029	-0.459388	-0.350834	Cer	8
Cer m37:2_33.93	0.521448	-0.464072	-0.404854	Cer	8
Cer m37:3_18.27	0.649059	-0.525146	-0.570744	Cer	8
Cer m37:4_16.63	0.866821	-0.77278	-0.671302	Cer	8
Cer m38:0_31.53	0.689821	-0.487395	-0.69661	Cer	8
Cer m38:4_34.73	0.579547	-0.514732	-0.451293	Cer	8
Cer m39:0_32.19	0.666592	-0.620966	-0.482264	Cer	8
Cer m39:0_33.14	0.764317	-0.623168	-0.666028	Cer	8
Cer m39:4_30.1	0.832685	-0.619272	-0.801507	Cer	8
Cer m40:0_33.44	0.714793	-0.556476	-0.656364	Cer	8
Cer m40:1_36.86	0.645768	-0.456826	-0.651415	Cer	8
Cer m41:0_34.08	0.851591	-0.745041	-0.677532	Cer	8
Cer m41:2_33.07	0.223038	-0.212151	-0.155789	Cer	8
Cer m42:0_36.77	0.636802	-0.474024	-0.61241	Cer	8
Cer m42:4_31.59	0.310687	-0.236349	-0.292322	Cer	8
Cer m42:6_18.32	0.800001	-0.681154	-0.660352	Cer	8
Cer m43:2_36.01	0.228053	-0.219306	-0.156257	Cer	8
Cer m44:2_34.57	0.185823	-0.179681	-0.126068	Cer	8
Cer m45:7_33.62	0.249139	-0.198616	-0.222845	Cer	8
Cer m45:7_34.12	0.384216	-0.345862	-0.293316	Cer	8
Cer m46:3_36.61	0.264007	-0.214646	-0.230828	Cer	8
Cer m48:4_41.16	0.59049	-0.432939	-0.576285	Cer	8
Cer t33:3_19.92	0.458738	-0.355555	-0.423248	Cer	8
Cer t34:2_15.73	0.668974	-0.583948	-0.533926	Cer	8
Cer t34:3_19.89	0.43618	-0.304162	-0.445592	Cer	8
Cer t39:0_31.57	0.297067	-0.239743	-0.262001	Cer	8
Cer t40:0_30.03	0.746733	-0.699617	-0.53516	Cer	8
Cer t41:0_33.39	0.22848	-0.148141	-0.247647	Cer	8
Cer t45:6_33.81	0.238147	-0.178295	-0.227723	Cer	8
Cer t47:2_36.69	0.553746	-0.484708	-0.440251	Cer	8
Cer t48:2_36.72	0.414543	-0.345418	-0.351778	Cer	8
Cer1P d45:1_29.16	0.159868	-0.154973	-0.107965	Cer	8
Cer1P d48:2_31.96	0.399879	-0.362564	-0.30196	Cer	8
Cer1P m45:2_21.65	0.620173	-0.567705	-0.461433	Cer	8
Cer1P m48:2_33.96	0.307792	-0.21201	-0.317772	Cer	8
Cer1P t36:6_10.76	0.454305	-0.359085	-0.410292	Cer	8
Cer1P t47:0_35.17	0.446109	-0.33844	-0.42092	Cer	8
Cer1P t48:1_31.16	0.371605	-0.260281	-0.37816	Cer	8
FGM1 d39:4_8.38	0.594597	-0.481164	-0.52275	FGM1	8
FGM1 t33:0_15.71	0.665285	-0.57845	-0.533879	FGM1	8
Gb3 t44:4_29.25	0.165515	-0.133129	-0.146546	Gb3	8
Gg4 t30:1_21.48	0.616172	-0.505639	-0.532788	Gg4	8
Gg4 t43:3_26.67	0.896328	-0.603621	-0.942926	Gg4	8
GM1 d30:1_15.59	0.643206	-0.593886	-0.472083	GM1	8
GM4 d32:2_22.93	0.707733	-0.632142	-0.546583	GM4	8
GM4 d36:4_29.26	0.165167	-0.13283	-0.146263	GM4	8
GM4 d46:6_29.96	0.471201	-0.44	-0.339566	GM4	8
GT1 t41:2_12.52	0.921876	-0.748108	-0.807808	GT1	8
HexCer d38:1_30.18	0.251769	-0.175166	-0.257711	HexCer	8
HexCer d40:2_31.7	0.255151	-0.244845	-0.175486	HexCer	8
HexCer d41:1_29.27	0.164612	-0.135119	-0.142289	HexCer	8
HexCer d42:3_30.2	0.19172	-0.178602	-0.1387	HexCer	8
HexCer d44:1_32	0.726256	-0.605956	-0.615271	HexCer	8
HexCer d47:5_34.61	0.142673	-0.116875	-0.123626	HexCer	8
HexCer t38:4_26.6	0.752514	-0.518476	-0.776739	HexCer	8
HexCer t42:2_29.14	0.164831	-0.119072	-0.163132	HexCer	8
HexCer t48:3_35.9	0.366615	-0.283055	-0.33965	HexCer	8
LacCer d40:1_39.02	0.471975	-0.407931	-0.381859	LacCer	8
LacCer d43:4_33.32	0.41389	-0.275658	-0.439317	LacCer	8
LacCer t35:3_20.14	0.491107	-0.422809	-0.399447	LacCer	8
LacCer t36:2_19.38	0.286985	-0.228662	-0.256857	LacCer	8
LacCer t40:2_29.25	0.15579	-0.118843	-0.146163	LacCer	8
Lyso GM1 d24:2_9.41	0.364271	-0.343153	-0.258686	Lyso GM1	8
NAP d23:3_7.6	0.461278	-0.337151	-0.45152	NAP	8
NAP d28:5_15.34	0.373992	-0.292035	-0.342302	NAP	8
Sulfatide t50:4_34.03	0.595265	-0.573376	-0.406663	Sulfatide	8

## Sheet: Aden vs Squa
67 differential glycosphingolipids (FDR<0.05 and Log2(FC)>1 ) between Aden and Squa
Class	Name	log2(FC), Aden/Squa	FDR
Cer	Cer d27:1_15.06	-1.1339	1.5082e-09
Cer	Cer d28:1_17.95	1.8031	6.2697e-20
Cer	Cer d34:1_25.92	-1.081	0.00061259
Cer	Cer d45:5_35.72	-3.3268	2.8232e-22
Cer	Cer d46:4_33.97	-1.2709	1.5534e-06
Cer	Cer d46:4_35.14	-1.4895	1.0502e-08
Cer	Cer d48:0_33.8	-4.9541	1.904e-15
Cer	Cer d48:4_36.72	-3.2341	1.5082e-09
Cer	Cer d48:7_35.86	1.3014	0.00041228
Cer	Cer m25:1_15.33	-1.2296	3.7145e-07
Cer	Cer m26:2_12.61	1.6852	3.7286e-19
Cer	Cer m26:2_18.91	-2.3112	1.1909e-09
Cer	Cer m27:0_14.97	1.1746	0.048228
Cer	Cer m27:2_20.69	-1.5971	1.5318e-12
Cer	Cer m28:2_16.03	2.1406	2.6655e-24
Cer	Cer m29:2_20.72	2.02	1.3198e-11
Cer	Cer m30:0_32.26	1.0294	1.3772e-08
Cer	Cer m31:2_22.67	2.211	2.1613e-11
Cer	Cer m32:0_28.67	3.7654	1.1971e-35
Cer	Cer m32:0_34.28	1.2223	1.2049e-06
Cer	Cer m33:0_29.28	1.1783	6.6225e-12
Cer	Cer m33:0_29.8	6.6848	1.1265e-47
Cer	Cer m33:1_30.89	1.3829	2.2114e-05
Cer	Cer m33:3_12.59	1.3434	1.0998e-16
Cer	Cer m33:3_14.22	1.1449	8.2469e-17
Cer	Cer m34:0_30.9	4.3504	1.3862e-32
Cer	Cer m34:1_34.3	1.5892	2.0135e-05
Cer	Cer m35:0_31.94	6.5594	7.2516e-48
Cer	Cer m35:0_34.41	1.1166	2.2064e-10
Cer	Cer m36:0_33.51	1.08	5.2945e-10
Cer	Cer m36:1_29.43	1.2954	1.6545e-11
Cer	Cer m36:1_30.35	-1.8356	4.8377e-08
Cer	Cer m37:0_29.75	2.1313	1.0768e-20
Cer	Cer m37:0_30.16	3.4848	0.00071154
Cer	Cer m37:0_33.9	6.1607	1.3603e-41
Cer	Cer m37:0_36.15	1.2699	5.0486e-07
Cer	Cer m38:1_33.2	1.0881	1.4422e-07
Cer	Cer m38:4_34.73	1.1962	1.5091e-07
Cer	Cer m39:0_35.58	1.1376	3.3804e-05
Cer	Cer m42:3_36.55	-1.474	3.1166e-08
Cer	Cer m43:2_33.78	-6.1917	6.9152e-11
Cer	Cer m43:4_35.62	-3.6793	1.29e-09
Cer	Cer m45:5_35.73	-3.2416	9.6854e-20
Cer	Cer t34:4_12.91	2.0566	0.0080835
Cer	Cer t35:0_33.26	1.4164	8.6992e-12
Cer	Cer t37:0_35.08	1.0678	1.551e-08
Cer	Cer t42:0_20.73	-1.149	0.0014961
Cer	Cer t43:2_32.55	-1.0866	9.9119e-05
Cer	Cer1P d23:0_11.31	1.3985	0.00030644
Cer	Cer1P d23:0_6.89	1.9152	0.00014061
Cer	Cer1P d26:0_10.85	1.495	0.0002248
Cer	Cer1P d26:1_7.57	1.5504	0.00034327
Cer	Cer1P m46:2_31.86	1.308	1.5177e-10
Cer	Cer1P t29:3_10.78	1.4813	0.026575
Cer	Cer1P t39:3_44.73	-1.747	1.3321e-09
Cer	Cer1P t44:1_30.41	1.0436	0.0039652
Cer	Cer1P t47:2_31.85	1.4062	9.3719e-11
Gg4	Gg4 d35:3_10.8	1.7412	0.0071164
GM1	GM1 t42:4_11.21	1.24	0.0095397
GM4	GM4 d40:5_7.33	1.0643	0.040748
GT1	GT1 d46:0_11.49	2.8819	1.7354e-07
GT1	GT1 t41:2_12.52	1.0354	6.145e-19
GT3	GT3 t33:2_4.23	1.0233	1.9614e-05
LacCer	LacCer d33:1_12.1	2.8566	8.077e-05
NAP	NAP d23:3_7.6	1.7159	0.00087896
NAP	NAP m18:2_2.01	1.8251	0.0058059
Sulfatide	Sulfatide d43:3_12.53	2.2657	6.6092e-06

## Sheet: Squa vs SCLC
159 differential glycosphingolipids (FDR<0.05 and Log2(FC)>1 ) between Squa and SCLC
Class	Name	log2(FC), Squa/SCLC	FDR
Cer	Cer d27:1_9.69	-1.698	0.042792
Cer	Cer d32:1_22.44	-1.1024	0.0084624
Cer	Cer m27:2_22.15	-1.8368	0.026199
Cer	Cer m28:2_22.15	-2.0215	0.033262
Cer	Cer m34:3_22.78	-1.2679	0.020178
Cer	Cer m36:1_30.35	1.3988	0.0094176
Cer	Cer m40:2_36.72	-1.1635	0.0021551
Cer	Cer m42:3_36.55	-1.1052	0.0009297
Cer	Cer t20:1_2.5	-1.5609	0.045501
Cer	Cer t21:1_3.61	-1.8523	0.0094176
Cer	Cer t23:1_6.2	-1.6297	0.013591
Cer	Cer t25:1_9.68	-1.7608	0.016881
Cer	Cer t31:1_20.34	-1.0582	0.045273
Cer	Cer1P d23:0_11.31	-3.3326	0.017724
Cer	Cer1P d23:0_6.89	-3.4821	0.035695
Cer	Cer1P d26:0_10.85	-2.5574	0.028002
Cer	Cer1P d26:1_7.57	-2.9156	0.033771
Cer	Cer1P d28:1_8.58	-2.5861	0.0049003
Cer	Cer1P d30:0_14.98	-2.0751	0.0029596
Cer	Cer1P d30:1_12.18	-2.5505	0.002549
Cer	Cer1P d32:0_19.17	-1.8625	0.0029673
Cer	Cer1P d32:1_15.74	-2.1998	0.0029904
Cer	Cer1P d32:1_18.79	-2.2882	0.034341
Cer	Cer1P d34:1_19.84	-2.3823	0.0021844
Cer	Cer1P d48:5_29.76	-1.5009	0.0057025
Cer	Cer1P m36:7_8.78	-1.1809	0.033729
Cer	Cer1P t21:0_3.28	-3.316	0.0091087
Cer	Cer1P t21:0_6.02	-2.5624	0.003669
Cer	Cer1P t21:1_3.45	-1.2486	0.0057025
Cer	Cer1P t22:0_2.95	-2.9453	0.001253
Cer	Cer1P t22:0_3.29	-2.7005	0.0088436
Cer	Cer1P t22:0_7.96	-2.3769	0.0024323
Cer	Cer1P t23:0_5.2	-2.9751	0.0059105
Cer	Cer1P t24:0_5.2	-3.1172	0.0051227
Cer	Cer1P t24:0_5.85	-2.376	0.014665
Cer	Cer1P t24:0_7.42	-1.288	0.036987
Cer	Cer1P t24:0_7.69	-2.3812	0.014744
Cer	Cer1P t24:1_3.75	-2.3558	0.0060331
Cer	Cer1P t25:0_7.69	-2.0628	0.0088436
Cer	Cer1P t25:1_4.94	-2.5482	0.012144
Cer	Cer1P t26:0_8.85	-3.1187	0.020088
Cer	Cer1P t26:0_9.67	-2.4889	0.025671
Cer	Cer1P t26:1_5.87	-2.7549	0.0011452
Cer	Cer1P t26:1_6.53	-2.4767	0.02308
Cer	Cer1P t26:2_3.99	-2.5453	0.0011452
Cer	Cer1P t26:2_4.43	-2.862	0.02308
Cer	Cer1P t27:1_8.22	-2.2412	0.0097492
Cer	Cer1P t28:0_13.31	-1.4452	0.033771
Cer	Cer1P t28:1_9.37	-2.324	0.0035296
Cer	Cer1P t28:2_7.33	-2.2641	0.019495
Cer	Cer1P t28:3_4.86	-2.2351	7.4948e-05
Cer	Cer1P t28:3_5.36	-2.6625	0.0094176
Cer	Cer1P t28:3_6.17	-2.7049	0.022596
Cer	Cer1P t29:3_10.78	-1.6749	0.036971
Cer	Cer1P t30:0_17.31	-1.4493	0.034333
Cer	Cer1P t40:0_28.61	-1.548	0.002549
Cer	Cer1P t40:1_28.3	-1.2829	0.044951
Cer	Cer1P t40:2_24.56	-1.8009	0.036493
Cer	Cer1P t40:2_26.13	-1.5552	0.0039875
Cer	Cer1P t42:0_30.7	-1.4175	0.0093344
Cer	Cer1P t42:1_28.64	-1.4699	0.0037906
Cer	Cer1P t42:2_26.95	-1.8858	0.0059105
Cer	Cer1P t42:3_28.65	-1.9049	0.0039511
Cer	Cer1P t44:2_29.14	-1.6281	0.020041
Cer	Cer1P t44:3_26.99	-1.8126	0.0050445
Cer	Cer1P t44:5_24.56	-1.3613	0.011358
Cer	Cer1P t44:6_24	-1.4598	0.016881
Cer	Cer1P t45:3_29.54	-1.2258	0.022857
Cer	Cer1P t46:3_29.63	-1.3218	0.0049003
Cer	Cer1P t46:3_29.65	-1.3248	0.0076781
Cer	Cer1P t46:5_26.58	-1.3349	0.0050445
Cer	Cer1P t46:6_24.71	-1.5597	0.0078007
Cer	Cer1P t46:6_25.01	-1.9819	0.010361
Cer	Cer1P t46:6_25.85	-1.5292	0.012238
Cer	Cer1P t48:1_34.15	-1.5081	0.0060331
Cer	Cer1P t48:2_33	-1.0906	0.009048
Cer	Cer1P t48:4_29.26	-2.0598	0.0076781
Cer	Cer1P t48:4_30.2	-1.213	0.012182
Cer	Cer1P t48:4_30.77	-1.5404	0.016652
Cer	Cer1P t48:5_28.14	-1.3758	0.009048
Cer	Cer1P t48:5_28.66	-1.7619	0.0054633
Cer	Cer1P t48:6_26.83	-1.6906	0.021123
Cer	Cer1P t48:6_28.07	-1.4629	0.013048
Cer	Cer1P t48:7_25.9	-1.5184	0.0060331
FGM1	FGM1 t30:3_29.66	-1.0429	0.043125
FGM1	FGM1 t39:4_26.28	-1.0071	0.010086
GA2	GA2 t32:3_30.75	-1.1654	0.021378
GA2	GA2 t33:2_6.55	-2.1928	0.029601
GA2	GA2 t34:3_32.47	-1.1989	0.0025242
Gb3	Gb3 d30:3_29.51	-1.0651	0.012182
Gb3	Gb3 d32:2_32.56	-1.1113	0.045501
Gb3	Gb3 d34:2_22.28	-1.3731	0.047356
Gb3	Gb3 d34:4_5.83	-2.4025	0.020555
Gb3	Gb3 d37:5_30.82	-1.0664	0.0030264
Gb3	Gb3 d39:5_9.69	-1.8351	0.043557
Gb3	Gb3 t31:4_26.32	-1.0433	0.0011879
Gb3	Gb3 t36:2_6.51	-2.2332	0.040141
Gb3	Gb3 t36:3_4.36	-4.4183	0.035695
Gb3	Gb3 t40:6_12.21	-1.0362	2.8812e-05
GD1	GD1 t36:1_23.68	-1.0874	0.0073858
GM1	GM1 d31:0_4.51	-1.0674	0.020178
GM1	GM1 d43:1_6.56	-1.0952	0.014884
GM1	GM1 t40:0_4.33	-1.8585	0.026757
GM2	GM2 t49:0_6.54	-1.0849	0.016652
GM3	GM3 d48:2_4.47	-1.2832	0.0030264
GM3	GM3 t34:0_6.75	-1.7073	0.034333
GM4	GM4 d35:3_4.39	-1.8726	0.025671
GM4	GM4 d37:5_4.32	-1.0787	0.020555
GM4	GM4 d38:5_5.75	-2.7119	0.019436
GM4	GM4 d40:5_7.33	-2.8632	0.0076781
GM4	GM4 t44:2_5.75	-1.7572	0.020178
GT1	GT1 d46:0_11.49	-2.6934	3.1018e-10
HexCer	HexCer d38:5_26.26	-1.547	0.002549
HexCer	HexCer d38:6_24.39	-1.4809	0.014538
HexCer	HexCer d39:7_24.31	-2.7411	0.012249
HexCer	HexCer d40:5_28.49	-1.496	0.0039875
HexCer	HexCer d41:7_23.88	-1.3964	0.047786
HexCer	HexCer d41:7_26.91	-1.5673	0.025616
HexCer	HexCer d42:1_31.42	-1.0987	0.020178
HexCer	HexCer d42:6_28.9	-1.5194	0.020178
HexCer	HexCer d43:6_28.11	-1.4785	0.017798
HexCer	HexCer d43:6_29.72	-1.3488	0.028016
HexCer	HexCer d43:7_25.92	-1.4968	0.010612
HexCer	HexCer d45:4_31.61	-1.1746	0.018885
HexCer	HexCer d47:5_31.84	-1.6373	0.019186
HexCer	HexCer d47:5_32.67	-1.2356	0.034274
HexCer	HexCer d47:6_30.56	-1.3087	0.0074848
HexCer	HexCer t38:4_21.03	-1.2987	0.045798
HexCer	HexCer t41:0_31.42	-1.242	0.012805
HexCer	HexCer t41:0_31.75	-1.2484	0.012074
HexCer	HexCer t41:1_29.56	-1.1749	0.012182
HexCer	HexCer t41:3_29.76	-1.4871	0.0060331
HexCer	HexCer t42:2_33.45	-1.5557	0.028016
HexCer	HexCer t42:4_30.19	-1.17	0.010126
HexCer	HexCer t42:7_26.54	-1.1424	0.0049003
HexCer	HexCer t44:6_9.58	-1.7002	0.0011452
LacCer	LacCer d32:1_22.43	-1.6229	0.0012716
LacCer	LacCer d32:4_28.73	-1.0961	0.029488
LacCer	LacCer d33:1_12.1	-2.9123	3.5092e-06
LacCer	LacCer d36:0_30.62	-1.3917	0.0024083
LacCer	LacCer t33:2_24.02	-1.2782	0.0024121
LacCer	LacCer t34:1_22.78	-1.1476	0.031257
LacCer	LacCer t38:3_30.75	-1.0945	0.041956
LacCer	LacCer t39:0_33.81	-1.1927	0.012182
LacCer	LacCer t41:5_2.1	-1.2851	0.0021052
NAP	NAP m21:4_6.42	-2.4931	0.02134
NAP	NAP m25:2_22.36	-1.8892	0.025475
Sulfatide	Sulfatide d41:1_29.72	-1.0544	0.020178
Sulfatide	Sulfatide d42:0_30.24	-1.7361	0.041591
Sulfatide	Sulfatide d43:3_12.53	-2.4385	3.5092e-06
Sulfatide	Sulfatide d43:4_29.14	-1.3869	0.030971
Sulfatide	Sulfatide d46:4_32.59	-1.2138	0.028704
Sulfatide	Sulfatide d50:4_9.66	-1.4911	0.031129
Sulfatide	Sulfatide t34:2_20.43	-1.0765	0.04023
Sulfatide	Sulfatide t38:3_26.29	-1.3115	0.01293
Sulfatide	Sulfatide t40:0_28.92	-1.0949	0.025616
Sulfatide	Sulfatide t41:4_26.76	-1.2669	0.041449
Sulfatide	Sulfatide t42:0_30.76	-1.0732	0.0078588
Sulfatide	Sulfatide t46:1_5.68	-1.7735	0.0021551

## Sheet: Aden vs SCLC
188 differential glycosphingolipids (FDR<0.05 and Log2(FC)>1 ) between Aden and SCLC
Class	Name	log2(FC), Aden/SCLC	FDR
Cer	Cer d27:1_15.06	-1.5821	1.0967e-10
Cer	Cer d28:1_17.95	1.8238	1.244e-17
Cer	Cer d30:1_14.95	1.3115	0.00036695
Cer	Cer d32:1_18.45	1.1479	9.9918e-05
Cer	Cer d34:1_21.77	1.5134	0.00021085
Cer	Cer d34:1_25.92	-1.2002	3.7867e-10
Cer	Cer d36:1_23.73	-1.0101	0.014682
Cer	Cer d36:4_27.17	1.0512	2.0495e-08
Cer	Cer d38:4_29.52	1.0925	8.7694e-06
Cer	Cer d39:2_23.63	-1.3617	0.008184
Cer	Cer d40:1_29.54	1.0463	9.2681e-05
Cer	Cer d42:2_33.91	1.1885	2.448e-06
Cer	Cer d42:2_35.59	-1.8121	0.0011448
Cer	Cer d44:5_34.76	1.0308	0.020928
Cer	Cer d45:5_35.72	-3.3292	1.5018e-15
Cer	Cer d46:4_33.97	-1.0655	0.0039541
Cer	Cer d46:4_35.14	-1.4521	4.137e-10
Cer	Cer d48:0_33.8	-5.7826	1.0054e-21
Cer	Cer d48:4_36.72	-3.7132	1.7478e-10
Cer	Cer m25:1_15.33	-1.4539	7.4044e-12
Cer	Cer m26:2_12.61	1.3013	4.9552e-12
Cer	Cer m26:2_18.91	-3.5391	2.0218e-08
Cer	Cer m27:2_20.69	-1.7003	3.8387e-14
Cer	Cer m27:2_22.15	-2.4179	1.995e-05
Cer	Cer m28:2_16.03	1.9338	1.0661e-18
Cer	Cer m28:2_22.15	-3.012	5.3261e-06
Cer	Cer m29:2_20.72	2.0787	4.544e-10
Cer	Cer m31:2_22.67	2.3116	5.9807e-10
Cer	Cer m32:0_28.67	3.07	2.6919e-23
Cer	Cer m32:0_34.28	1.4247	2.0377e-07
Cer	Cer m33:0_29.8	6.4021	3.7132e-41
Cer	Cer m33:3_12.59	1.5657	3.613e-16
Cer	Cer m33:3_14.22	1.0566	3.9524e-13
Cer	Cer m34:0_30.9	4.1839	1.1172e-26
Cer	Cer m34:1_32.89	1.2332	6.2007e-06
Cer	Cer m34:1_34.3	2.3204	1.5241e-07
Cer	Cer m35:0_31.94	6.2994	7.7832e-45
Cer	Cer m36:1_29.43	1.4179	4.8096e-11
Cer	Cer m37:0_29.75	1.3618	1.8594e-09
Cer	Cer m37:0_30.16	3.3423	0.0050858
Cer	Cer m37:0_33.9	6.0165	1.7315e-36
Cer	Cer m37:0_36.15	1.0541	2.8297e-05
Cer	Cer m38:1_33.2	1.662	3.7125e-11
Cer	Cer m38:4_34.73	1.092	7.3612e-06
Cer	Cer m40:2_36.72	-1.29	9.3743e-07
Cer	Cer m41:0_44.56	-1.4644	0.0063069
Cer	Cer m42:3_36.55	-2.5792	5.8179e-20
Cer	Cer m43:2_33.78	-6.9557	6.4684e-13
Cer	Cer m43:4_35.62	-3.7637	4.7549e-06
Cer	Cer m45:5_35.73	-3.4003	2.2032e-17
Cer	Cer t41:1_35.01	1.5737	4.7463e-07
Cer	Cer t42:0_20.73	-1.5012	0.0033097
Cer	Cer1P d28:1_8.58	-1.6734	0.02268
Cer	Cer1P d30:0_14.98	-1.5062	0.0044495
Cer	Cer1P d30:1_12.18	-1.6063	0.012172
Cer	Cer1P d32:0_19.17	-1.4135	0.0038333
Cer	Cer1P d32:1_15.74	-1.4884	0.0054841
Cer	Cer1P d32:2_13.22	-1.068	0.038996
Cer	Cer1P d34:1_19.84	-1.8432	0.0012516
Cer	Cer1P d48:5_29.76	-1.445	0.00031388
Cer	Cer1P t21:0_3.28	-2.4896	0.025746
Cer	Cer1P t21:0_6.02	-1.7758	0.018521
Cer	Cer1P t21:1_3.45	-1.6016	2.0377e-07
Cer	Cer1P t22:0_2.95	-2.2572	0.0021975
Cer	Cer1P t22:0_3.29	-1.9623	0.021695
Cer	Cer1P t22:0_7.96	-1.7235	0.0073529
Cer	Cer1P t23:0_5.2	-1.9398	0.021525
Cer	Cer1P t24:0_5.2	-2.0991	0.019198
Cer	Cer1P t24:0_7.69	-1.6684	0.033507
Cer	Cer1P t24:1_3.75	-1.5736	0.026469
Cer	Cer1P t25:0_7.69	-1.3842	0.029888
Cer	Cer1P t26:1_5.87	-2.2729	2.9901e-05
Cer	Cer1P t26:2_3.99	-2.6407	2.4904e-07
Cer	Cer1P t26:2_43.82	-1.7647	3.3716e-09
Cer	Cer1P t28:0_13.31	-1.2102	0.030079
Cer	Cer1P t28:1_9.37	-1.9617	0.00017842
Cer	Cer1P t28:3_4.86	-3.1673	5.3086e-11
Cer	Cer1P t28:3_5.36	-1.7782	0.04568
Cer	Cer1P t28:3_6.17	-2.0335	0.03125
Cer	Cer1P t30:0_17.31	-1.2681	0.020568
Cer	Cer1P t39:3_44.73	-2.0582	8.0537e-09
Cer	Cer1P t40:0_28.61	-1.2471	0.0015056
Cer	Cer1P t40:2_24.56	-1.5634	0.046504
Cer	Cer1P t40:2_26.13	-1.2166	0.0039593
Cer	Cer1P t42:0_30.7	-1.3689	0.0011844
Cer	Cer1P t42:1_28.64	-1.1311	0.0049706
Cer	Cer1P t42:2_26.95	-1.3843	0.021237
Cer	Cer1P t42:3_28.65	-1.6518	0.00083855
Cer	Cer1P t44:3_26.99	-1.2877	0.018877
Cer	Cer1P t44:5_24.56	-1.0257	0.017483
Cer	Cer1P t44:6_24	-1.2507	0.012418
Cer	Cer1P t45:3_29.54	-1.206	0.0039796
Cer	Cer1P t46:3_29.63	-1.1285	0.0017141
Cer	Cer1P t46:3_29.65	-1.1579	0.003704
Cer	Cer1P t46:6_24.71	-1.0726	0.029888
Cer	Cer1P t46:6_25.01	-1.7974	0.0042498
Cer	Cer1P t46:6_25.85	-1.2651	0.0084977
Cer	Cer1P t47:2_31.85	1.1069	1.7477e-06
Cer	Cer1P t48:0_32.51	-1.1263	0.040888
Cer	Cer1P t48:1_34.15	-1.1782	0.0067944
Cer	Cer1P t48:4_30.2	-1.0769	0.0046717
Cer	Cer1P t48:4_30.77	-1.2476	0.021963
Cer	Cer1P t48:5_28.14	-1.1837	0.0048408
Cer	Cer1P t48:5_28.66	-1.4209	0.0054963
Cer	Cer1P t48:6_28.07	-1.4588	0.001538
Cer	Cer1P t48:7_25.9	-1.2002	0.0062394
FGM1	FGM1 t30:3_29.67	-1.1282	0.014312
GA2	GA2 t32:2_32.55	-1.0905	0.0015404
GA2	GA2 t32:3_30.75	-1.2454	0.001197
GA2	GA2 t34:3_32.47	-1.1214	7.3599e-05
Gb3	Gb3 d30:2_32.56	-1.0513	0.00020752
Gb3	Gb3 d30:4_29.53	-1.0191	0.00028386
Gb3	Gb3 d32:2_32.56	-1.1621	0.0065681
Gb3	Gb3 d37:5_30.82	-1.1116	2.7105e-05
Gb3	Gb3 d42:4_31.17	-1.4152	0.012665
Gb3	Gb3 d44:4_32.95	-1.4412	0.00037337
Gb3	Gb3 t30:2_32.55	-1.1069	0.00031035
Gb3	Gb3 t30:6_28.14	-1.1374	5.9371e-09
Gb3	Gb3 t31:4_26.32	-1.1016	7.6359e-06
Gb3	Gb3 t38:2_32.58	-1.0858	0.018368
GD1	GD1 d42:2_28.03	-1.0309	2.4967e-06
GD1	GD1 t36:0_23.69	-1.3335	0.0060827
GD1	GD1 t36:1_23.68	-1.1898	5.4921e-05
GD3	GD3 d36:2_26.49	-1.0221	5.3952e-07
GM3	GM3 t40:1_29.12	-1.1976	0.0081906
GM4	GM4 d34:4_29.71	-1.1252	3.2456e-07
GM4	GM4 d34:6_32.57	-1.0882	0.00060434
GM4	GM4 d35:4_32.55	-1.498	5.7056e-06
GM4	GM4 t47:5_30.98	-1.0716	0.0010425
GT1	GT1 t41:2_12.52	1.0906	2.3696e-17
HexCer	HexCer d35:2_34.49	1.1408	0.0045544
HexCer	HexCer d36:4_25.72	1.0144	4.4371e-06
HexCer	HexCer d38:5_26.26	-1.2114	0.002312
HexCer	HexCer d38:6_24.39	-1.0517	0.049958
HexCer	HexCer d39:7_23.94	-2.7061	0.028552
HexCer	HexCer d40:5_28.49	-1.3042	0.0015056
HexCer	HexCer d41:7_26.91	-1.4003	0.0098704
HexCer	HexCer d42:1_31.42	-1.0368	0.0057961
HexCer	HexCer d42:6_28.9	-1.4491	0.0086942
HexCer	HexCer d43:6_28.11	-1.2801	0.010196
HexCer	HexCer d43:6_29.72	-1.5009	0.0018644
HexCer	HexCer d43:7_25.92	-1.185	0.012488
HexCer	HexCer d44:4_31.43	-1.0023	0.00076204
HexCer	HexCer d46:3_34.14	-1.0256	0.041485
HexCer	HexCer d46:4_32.18	-1.168	0.0051457
HexCer	HexCer d47:5_31.84	-1.1062	0.042078
HexCer	HexCer d47:5_32.67	-1.315	0.0028829
HexCer	HexCer d47:6_30.56	-1.1521	0.0014436
HexCer	HexCer t41:0_31.42	-1.1924	0.00259
HexCer	HexCer t41:0_31.75	-1.0135	0.0098498
HexCer	HexCer t41:2_31.59	-1.0446	0.0054911
HexCer	HexCer t41:3_29.76	-1.4336	0.00038704
HexCer	HexCer t42:2_33.45	-1.3561	0.032054
HexCer	HexCer t44:6_9.58	-1.1581	0.0053965
HexCer	HexCer t46:4_32.83	-1.3997	0.0056498
HexCer	HexCer t46:6_31.84	-1.0603	0.0001354
LacCer	LacCer d32:1_22.43	-1.2222	0.0011891
LacCer	LacCer d32:4_28.73	-1.3675	0.00038592
LacCer	LacCer d36:0_30.62	-1.3576	9.2681e-05
LacCer	LacCer t33:2_24.02	-1.1049	0.00029666
LacCer	LacCer t35:1_28.01	-1.1227	4.8952e-09
LacCer	LacCer t37:2_31.63	-1.0933	0.0041527
LacCer	LacCer t37:3_33.46	-1.064	6.89e-06
LacCer	LacCer t37:5_29.73	-1.066	0.00017216
LacCer	LacCer t38:3_30.75	-1.5223	0.00013976
LacCer	LacCer t39:0_33.81	-1.0835	0.0017516
LacCer	LacCer t39:2_33.46	-1.1399	7.9147e-05
LacCer	LacCer t41:5_32.47	-1.0183	0.00072226
LacCer	LacCer t46:5_7.55	-1.2245	0.010844
Lyso	Lyso GM1 d23:2_21.68	1.3913	0.024761
NAP	NAP d23:3_7.6	2.288	0.00057466
NAP	NAP m25:2_22.36	-2.5672	1.9849e-05
Sulfatide	Sulfatide d39:1_29.72	-1.0128	0.0063429
Sulfatide	Sulfatide d41:1_29.72	-1.521	6.2989e-06
Sulfatide	Sulfatide d41:3_26.31	-1.1001	1.6351e-05
Sulfatide	Sulfatide d42:0_34.61	1.0897	0.0097807
Sulfatide	Sulfatide d42:4_25.97	-1.0602	1.9849e-05
Sulfatide	Sulfatide d43:4_28.28	-1.0755	4.2844e-06
Sulfatide	Sulfatide d43:4_29.14	-1.4872	0.001365
Sulfatide	Sulfatide d46:4_32.59	-1.1743	0.009359
Sulfatide	Sulfatide t34:2_20.43	-1.1256	0.0054711
Sulfatide	Sulfatide t40:0_28.92	-1.1162	0.0034801
Sulfatide	Sulfatide t41:4_26.76	-1.1825	0.029949
Sulfatide	Sulfatide t42:0_30.76	-1.2691	2.5091e-05
Sulfatide	Sulfatide t42:2_29.14	-1.5484	0.0024349
Sulfatide	Sulfatide t42:2_30.75	-1.1878	1.995e-05
Sulfatide	Sulfatide t44:1_7.06	-1.4334	0.033507
Sulfatide	Sulfatide t46:1_5.68	-1.2632	0.0064936
